# Supplementary material for: FOXO1 Is a Key Mediator of Glucocorticoid-Induced Expression of Tristetraprolin in MDA-MB-231 Breast Cancer Cells
Source: MDPI journal article supplement (doi:10.3390/ijms232213673), 2022-11-08
Supplement: s1 [file s1]

**FOXO1 Is a Key Mediator for Glucocorticoid-Induced Expression of Tristetraprolin in  
MDA-MB-231 Breast Cancer Cells**

**Do Yong Jeon<sup>1,¶</sup>, So Yeon Jeong<sup>1,¶</sup>, Ju Won Lee<sup>1,¶</sup>, Jeonghwan Kim<sup>2</sup>, Jee Hyun Kim<sup>3</sup>, Hun So Chu<sup>3</sup>,  
Won Jin Jeong<sup>3</sup>, Byung Ju Lee<sup>1</sup>, Byungyong Ahn<sup>4</sup>, Junil Kim<sup>2</sup>, Seong Hee Choi<sup>3,\*</sup>, Jeong Woo Park<sup>1,\*</sup>**

<sup>1</sup> Department of Biological Sciences, University of Ulsan, Ulsan 44610, Korea

<sup>2</sup> School of System Biomedical Science, Soongsil University, Seoul 06978, Korea

<sup>3</sup> RopheLBio, B102, Seoul Forest M Tower, Seoul 04778, Korea

<sup>4</sup> Department of Food Science and Nutrition, University of Ulsan, Ulsan 44610, Korea

\* Correspondence: Seong Hee Choi [nacchal@ulsan.ac.kr](mailto:nacchal@ulsan.ac.kr); Jeong Woo Park [jwpark@ulsan.ac.kr](mailto:jwpark@ulsan.ac.kr)

¶These authors contributed equally to this work.

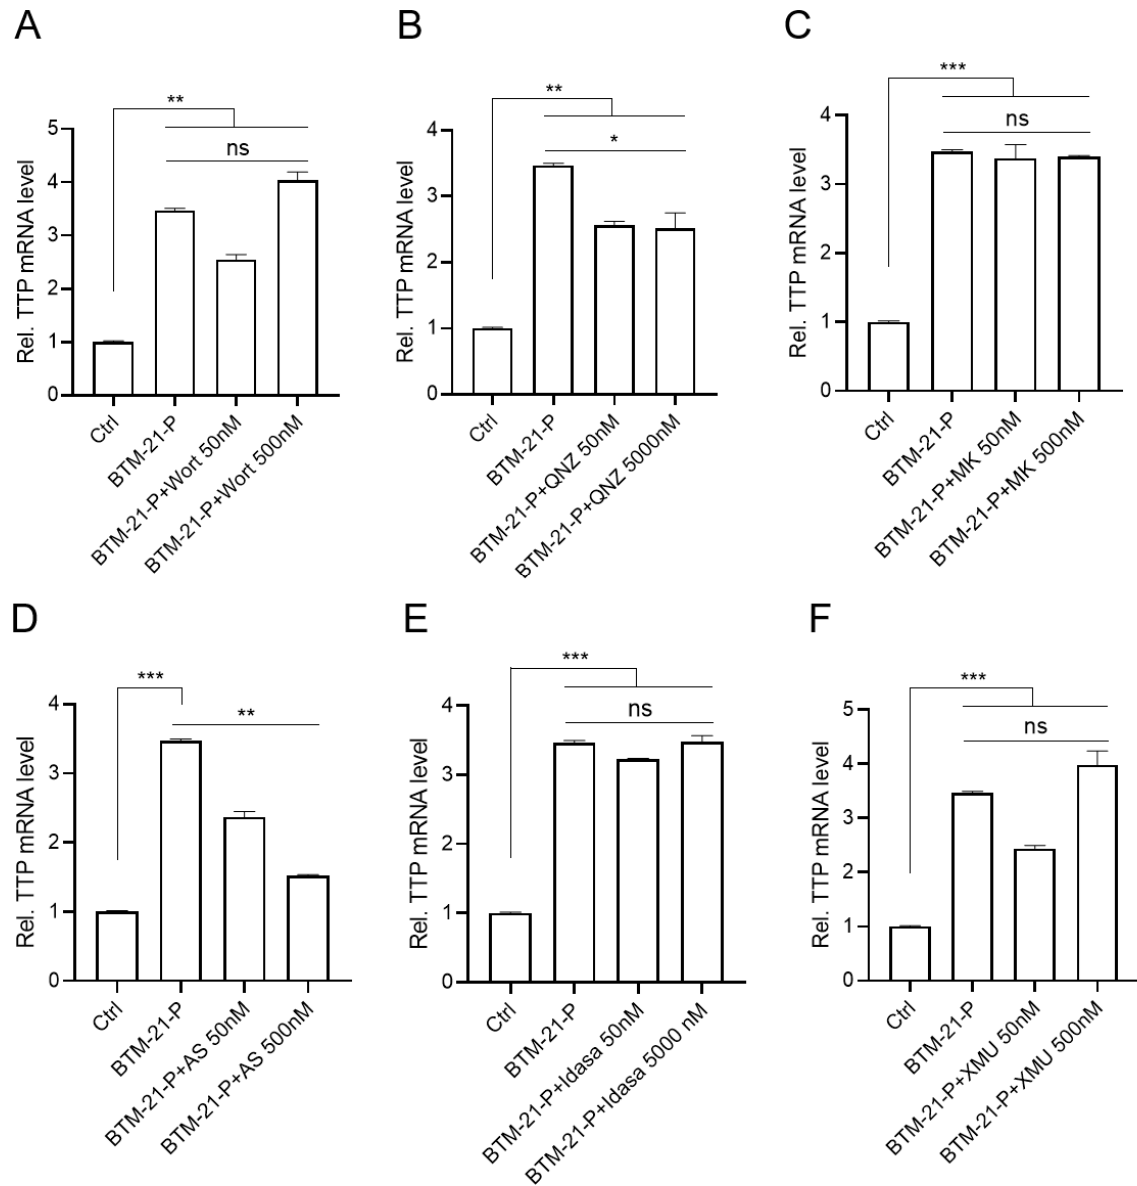

**Supplement Figure S1.** FOXO1 mediates BTM-21-P-induced TTP expression in MDA-MB-231 cells. MDA-MB-231 cells were incubated in the presence of indicated concentration of inhibitors against (A) PI3K (Wortmannin) (B) NF- $\kappa$ B (QNZ), (C) AKT (MK2206), (D) FOXO1 (AS1842856), (E) MDM2 (Idasanutlin), and (F) MST1/2 (XMU-MP-1) for 12 h, followed by stimulation with 500 nM BTM-21-P for 3 h. The expression level of TTP was analyzed by qRT-PCR. Fold change in expression level was calculated relative to that of DMSO control. The graphs are means  $\pm$  SD of 3 independent experiment. (One-way ANOVA, \*,  $p < 0.05$ ; \*\*,  $p < 0.005$ ; \*\*\*,  $p < 0.001$ ). ns, not significant.

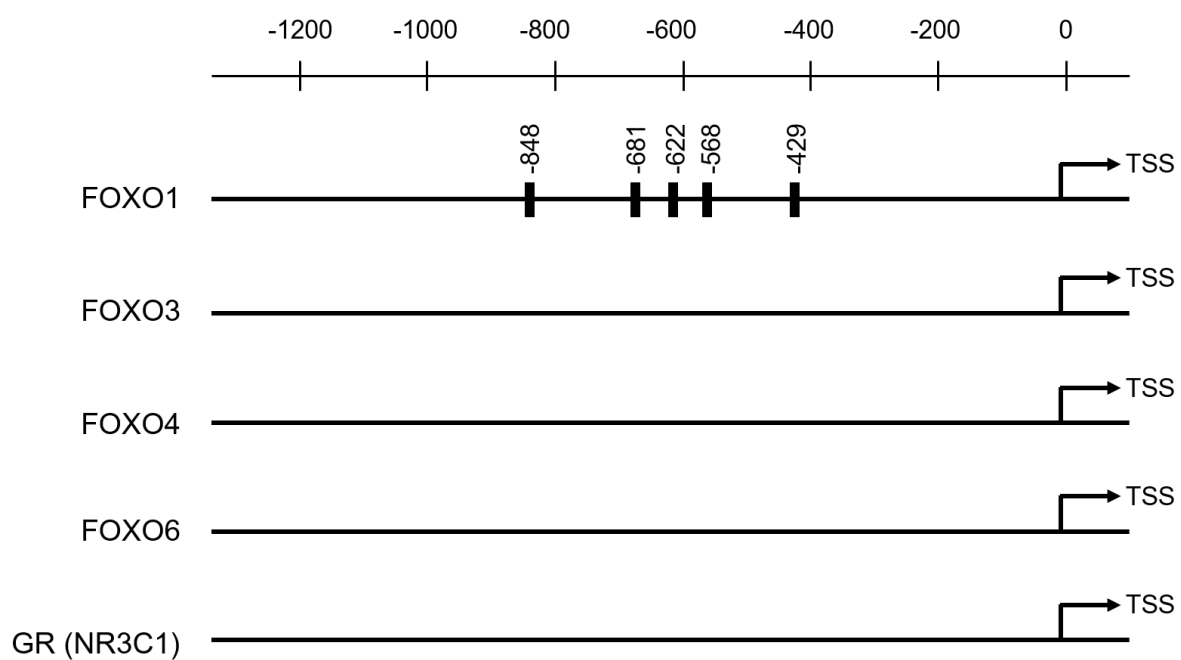

**Supplementary Figure S2.** The JASPAR prediction ( $p$  value = 0.001) for the binding positions of FOXO1, FOXO3, FOXO4, FOXO6, and GR (NR3C1) on the promoter of the TTP gene. TSS, transcription start site.
