# Supplementary material for: FOXO1 Is a Key Mediator of Glucocorticoid-Induced Expression of Tristetraprolin in MDA-MB-231 Breast Cancer Cells
Source: MDPI journal article supplement (doi:10.3390/ijms232213673), 2022-11-08
Supplement: s1 [file s1]

**Table S2.** Fold changes in TTP promoter activity induced in breast cancer cells by 5 selected natural compounds.

| Compound name | Fold changes in TTP-Promoter Luciferase activity |                  |                  |                           |      |      |      |
|---------------|--------------------------------------------------|------------------|------------------|---------------------------|------|------|------|
|               | 1 <sup>st</sup>                                  | 2 <sup>nd</sup>  | 3 <sup>rd</sup>  | 4 <sup>th</sup> screening |      |      |      |
|               | screening (30µl)                                 | screening (30µl) | screening (30µl) | 5µl                       | 10µl | 30µl | 50µl |
| 01-E10        | 5.12                                             | 2.09             | 3.27             | 3.63                      | 4.77 | 6.82 | 6.37 |
| 01-G05        | 5.28                                             | 2.52             | 2.4              | 1.49                      | 2.02 | 4.21 | 5.50 |
| 07-B10        | 3.29                                             | 2.43             | 2.61             | 1.18                      | 1.32 | 1.28 | 1.66 |
| 07-A10        | 2.99                                             | 2.04             | 2.38             | 1.44                      | 1.12 | 1.49 | 1.56 |
| 05-A06        | 2.32                                             | 2.69             | 3.14             | 2.45                      | 3.28 | 5.64 | 5.91 |

1<sup>st</sup>, 2<sup>nd</sup>, and 3<sup>rd</sup> screenings were conducted using MCF-7 cells and 4<sup>th</sup> screening was conducted using MDA-MB-231 cells.
