# Supplementary material for: FOXO1 Is a Key Mediator of Glucocorticoid-Induced Expression of Tristetraprolin in MDA-MB-231 Breast Cancer Cells
Source: Int J Mol Sci. 2022 Nov 8;23(22):13673. doi: 10.3390/ijms232213673 (PMC9693238; doi:10.3390/ijms232213673)
Supplement: Supplementary file 1 [file ijms-23-13673-s001.zip]

Archive with 4 entries (4 files):
- Supplementary Figures.pdf
- Table S1. TTP promoter activities stimulated by 1019 natural compounds.xlsx
- Table S2. Fold changes in TTP promoter activity by 5 selected compounds.pdf
- Table S3. DEGs-no treatment vs DXM 21-P or BTM 21-P 3h.xlsx
