# Supplementary material for: FOXO1 Is a Key Mediator of Glucocorticoid-Induced Expression of Tristetraprolin in MDA-MB-231 Breast Cancer Cells
Source: Int J Mol Sci. 2022 Nov 8;23(22):13673. doi: 10.3390/ijms232213673 (PMC9693238; doi:10.3390/ijms232213673)
Supplement: Supplementary file 1 [file ijms-23-13673-s001.zip › Table S1. TTP promoter activities stimulated by 1019 natural compounds.xlsx]

## Sheet: 농도파일
		DMSO에 녹임.			1. 실험농도 단위를 기재하여 주세요. 2. 항목이 틀리면 변경하여 주세요.
No	ID	Position	농도(mM)	Volume(㎕)	실험농도	%inhibition	IC50(uM)	비고	1차-1	1차-2	2차-1	2차-2
1	96010	NPS-D1-000001-A03	5	5					1.02756
2	226607	NPS-D1-000001-B03	4.9	5					1.39168
3	92326	NPS-D1-000001-C03	5.14	5					1.39044
4	219331	NPS-D1-000001-D03	5.4	5					0.971897
5	206511	NPS-D1-000001-E03	5.2	5					0.918292
6	95923	NPS-D1-000001-F03	5.1	5					1.26787
7	206520	NPS-D1-000001-G03	5.4	5					1.10805
8	206546	NPS-D1-000001-H03	5.4	5					0.98251
9	95925	NPS-D1-000001-A04	5.06	5					1.15432
10	95664	NPS-D1-000001-B04	5.04	5					1.22852
11	206515	NPS-D1-000001-C04	4.9	5					1.01319
12	226623	NPS-D1-000001-D04	5.4	5					1.06148
13	206534	NPS-D1-000001-E04	5.3	5					0.830694
14	220817	NPS-D1-000001-F04	4.8	5					1.30847
15	206547	NPS-D1-000001-G04	5.4	5					0.725937
16	209574	NPS-D1-000001-H04	5	5					1.00527
17	95722	NPS-D1-000001-A05	5.08	5					0.85702
18	96048	NPS-D1-000001-B05	4.98	5					1.15621
19	206517	NPS-D1-000001-C05	5.1	5					1.52954
20	206536	NPS-D1-000001-D05	4.5	5					0.913191
21	219353	NPS-D1-000001-E05	4.9	5					0.981003
22	423170	NPS-D1-000001-F05	4.86	5					No TF
23	416198	NPS-D1-000001-G05	4.71	5					5.28549		2.52	2.4
24	416222	NPS-D1-000001-H05	5.03	5					1.14045
25	416106	NPS-D1-000001-A06	4.95	5					0.871582
26	416601	NPS-D1-000001-B06	4.97	5					0.71325
27	416609	NPS-D1-000001-C06	4.85	5					0.972375
28	416625	NPS-D1-000001-D06	5.25	5					0.821444
29	416633	NPS-D1-000001-E06	4.94	5					1.28274
30	416657	NPS-D1-000001-F06	5.01	5					0.90948
31	416394	NPS-D1-000001-G06	4.87	5					1.47015
32	423162	NPS-D1-000001-H06	4.87	5					No TF
33	416108	NPS-D1-000001-A07	4.7	5					0.988224
34	416419	NPS-D1-000001-B07	5.21	5					1.15481
35	416364	NPS-D1-000001-C07	5.14	5					0.946438
36	416380	NPS-D1-000001-D07	5.17	5					1.10573
37	416388	NPS-D1-000001-E07	5.36	5					0.855473
38	416109	NPS-D1-000001-F07	5.05	5					0.854018
39	416420	NPS-D1-000001-G07	5.14	5					0.838917
40	416421	NPS-D1-000001-H07	5.07	5					1.84263		0.9
41	416112	NPS-D1-000001-A08	5.06	5					1.16357
42	416466	NPS-D1-000001-B08	4.88	5					1.33995
43	416498	NPS-D1-000001-C08	4.92	5					1.21088
44	416435	NPS-D1-000001-D08	4.51	5					0.719414
45	416530	NPS-D1-000001-E08	4.79	5					1.10376
46	416546	NPS-D1-000001-F08	5.45	5					1.00594
47	416562	NPS-D1-000001-G08	4.81	5					1.1206
48	424907	NPS-D1-000001-H08	4.76	5					0.881932
49	416578	NPS-D1-000001-A09	5.13	5					0.860164
50	416515	NPS-D1-000001-B09	5.12	5					0.825549
51	416523	NPS-D1-000001-C09	5.09	5					1.13163
52	416531	NPS-D1-000001-D09	5.26	5					1.00193
53	425144	NPS-D1-000001-E09	4.76	5					1.04453
54	416122	NPS-D1-000001-F09	5.03	5					0.982504
55	416571	NPS-D1-000001-G09	4.68	5					1.00426
56	416579	NPS-D1-000001-H09	4.73	5					0.987762
57	425046	NPS-D1-000001-A10	4.73	5					0.879652
58	416516	NPS-D1-000001-B10	4.81	5					0.932093
59	416524	NPS-D1-000001-C10	5.1	5					0.977966
60	416548	NPS-D1-000001-D10	4.95	5					1.18814
61	423147	NPS-D1-000001-E10	4.62	5					5.1228		2.09	3.27
62	423155	NPS-D1-000001-F10	4.89	5					1.14509
63	423163	NPS-D1-000001-G10	5.07	5					0.783033
64	423171	NPS-D1-000001-H10	4.86	5					0.929881
65	423148	NPS-D1-000001-A11	4.87	5					0.880516
66	423156	NPS-D1-000001-B11	5.03	5					0.791305
67	423164	NPS-D1-000001-C11	4.97	5					1.00937
68	423172	NPS-D1-000001-D11	5.22	5					1.00895
69	416683	NPS-D1-000001-E11	5.17	5					1.04185
70	416723	NPS-D1-000001-F11	4.78	5					1.71085		1.04
71	416133	NPS-D1-000001-G11	5.09	5					0.909749
72	416130	NPS-D1-000001-H11	4.81	5					0.862881
73	416716	NPS-D1-000001-A12	4.78	5					1.1175
74	416732	NPS-D1-000001-B12	5.04	5					0.869063
75	416717	NPS-D1-000001-C12	5.21	5					0.886987
76	416733	NPS-D1-000001-D12	5.04	5					0.869501
77	416762	NPS-D1-000001-E12	5.11	5					0.788282
78	416794	NPS-D1-000001-F12	5.32	5					0.889078
79	416150	NPS-D1-000001-G12	5.07	5					0.769824
80	416763	NPS-D1-000001-H12	5.31	5					1.39854
81	91440	NPS-D1-000002-A03	4.9	5					1.66831		1.09
82	220830	NPS-D1-000002-B03	5.2	5					0.859306
83	91525	NPS-D1-000002-C03	5.05	5					0.61963
84	220901	NPS-D1-000002-D03	5	5					0.816595
85	220707	NPS-D1-000002-E03	5	5					0.53087
86	220800	NPS-D1-000002-F03	5.1	5					No TF
87	226616	NPS-D1-000002-G03	5.1	5					3.10239		0.79	0.93
88	220726	NPS-D1-000002-H03	4.8	5					0.763795
89	91986	NPS-D1-000002-A04	5.04	5					0.784069
90	220875	NPS-D1-000002-B04	5.1	5					0.769914
91	220790	NPS-D1-000002-C04	5.1	5					0.733483
92	220731	NPS-D1-000002-D04	5.1	5					1.04521
93	260311	NPS-D1-000002-E04	5	5					0.644461
94	220898	NPS-D1-000002-F04	4.9	5					0.970293
95	91822	NPS-D1-000002-G04	4.94	5					0.82165
96	260798	NPS-D1-000002-H04	5.1	5					0.625849
97	220722	NPS-D1-000002-A05	5.1	5					0.942962
98	220839	NPS-D1-000002-B05	5.2	5					0.318785		1.05	0.96
99	260777	NPS-D1-000002-C05	5	5					0.88245
100	226620	NPS-D1-000002-D05	4.6	5					0.967834
101	260349	NPS-D1-000002-E05	5.3	5					0.663342
102	220723	NPS-D1-000002-F05	4.9	5					1.14249
103	220797	NPS-D1-000002-G05	5.2	5					0.877468
104	220746	NPS-D1-000002-H05	5.3	5					0.648499
105	91437	NPS-D1-000002-A06	4.97	5					1.06487
106	219367	NPS-D1-000002-B06	5.3	5					0.934589
107	220835	NPS-D1-000002-C06	4.8	5					0.655687
108	220867	NPS-D1-000002-D06	5.1	5					0.845522
109	220879	NPS-D1-000002-E06	5.2	5					0.845442
110	91819	NPS-D1-000002-F06	4.94	5					0.952783
111	220869	NPS-D1-000002-G06	4.9	5					0.773656
112	209564	NPS-D1-000002-H06	5.4	5					0.843803
113	260340	NPS-D1-000002-A07	5.2	5					0.939607
114	220754	NPS-D1-000002-B07	5.2	5					1.55801
115	220832	NPS-D1-000002-C07	5.2	5					1.54226
116	220891	NPS-D1-000002-D07	5.3	5					1.24812
117	260800	NPS-D1-000002-E07	4.9	5					1.07389
118	226635	NPS-D1-000002-F07	5.1	5					0.864156
119	220809	NPS-D1-000002-G07	5	5					1.03053
120	220823	NPS-D1-000002-H07	5.4	5					1.10797
121	220822	NPS-D1-000002-A08	5.3	5					1.53077
122	220712	NPS-D1-000002-B08	5.1	5					1.27807
123	220843	NPS-D1-000002-C08	4.8	5					0.852373
124	219364	NPS-D1-000002-D08	5	5					1.07301
125	220892	NPS-D1-000002-E08	4.8	5					1.10167
126	220870	NPS-D1-000002-F08	4.9	5					No TF
127	226599	NPS-D1-000002-G08	4.8	5					No TF
128	209585	NPS-D1-000002-H08	5.26	5					1.24209
129	220792	NPS-D1-000002-A09	5	5					1.15513
130	220862	NPS-D1-000002-B09	4.9	5					No TF
131	95820	NPS-D1-000002-C09	5	5					2.04356		1.15	0.89
132	220880	NPS-D1-000002-D09	5	5					1.41308
133	220721	NPS-D1-000002-E09	4.9	5					1.56225
134	220810	NPS-D1-000002-F09	5.3	5					1.5291
135	219321	NPS-D1-000002-G09	5.7	5					1.13716
136	220765	NPS-D1-000002-H09	5.1	5					1.63528
137	425318	NPS-D1-000002-A10	4.96	5					1.2489
138	220734	NPS-D1-000002-B10	5.2	5					1.38326
139	260328	NPS-D1-000002-C10	5.3	5					1.54969
140	95838	NPS-D1-000002-D10	5.1	5					1.38552
141	91826	NPS-D1-000002-E10	5.06	5					1.21794
142	220751	NPS-D1-000002-F10	5.2	5					No TF
143	220786	NPS-D1-000002-G10	4.6	5					1.52217
144	219359	NPS-D1-000002-H10	5.3	5					1.25187
145	91995	NPS-D1-000002-A11	5.05	5					1.31964
146	91490	NPS-D1-000002-B11	5.09	5					0.813281
147	220820	NPS-D1-000002-C11	5	5					0.516794
148	220896	NPS-D1-000002-D11	5.3	5					0.552793
149	220863	NPS-D1-000002-E11	4.9	5					0.683145
150	209583	NPS-D1-000002-F11	4.97	5					0.757807
151	91751	NPS-D1-000002-G11	4.85	5					0.710078
152	91459	NPS-D1-000002-H11	4.85	5					0.885568
153	220793	NPS-D1-000002-A12	5	5					0.711298
154	220819	NPS-D1-000002-B12	5.2	5					0.718488
155	220811	NPS-D1-000002-C12	4.9	5					0.623334
156	220806	NPS-D1-000002-D12	5.1	5					1.32303
157	260338	NPS-D1-000002-E12	4.8	5					0.989304
158	219356	NPS-D1-000002-F12	5.2	5					1.1402
159	206519	NPS-D1-000002-G12	5	5					1.07833
160	206521	NPS-D1-000002-H12	5.1	5					0.965517
161	220730	NPS-D1-000003-A03	4.8	5					1.11608
162	220894	NPS-D1-000003-B03	5.3	5					nd
163	226598	NPS-D1-000003-C03	4.9	5					0.893203
164	260804	NPS-D1-000003-D03	5	5					0.75759
165	220877	NPS-D1-000003-E03	5.2	5					0.528292
166	91890	NPS-D1-000003-F03	4.93	5					0.624108
167	91833	NPS-D1-000003-G03	4.97	5					0.859181
168	220814	NPS-D1-000003-H03	5.1	5					0.941975
169	220868	NPS-D1-000003-A04	4.9	5					0.8859
170	91524	NPS-D1-000003-B04	5.07	5					1.74267		0.82	0.83
171	209588	NPS-D1-000003-C04	4.5	5					0.946772
172	91827	NPS-D1-000003-D04	5.15	5					1.01515
173	209587	NPS-D1-000003-E04	5.1	5					0.763432
174	219328	NPS-D1-000003-F04	4.9	5					0.830692
175	206524	NPS-D1-000003-G04	5.5	5					0.826626
176	220724	NPS-D1-000003-H04	5.3	5					1.11041
177	220848	NPS-D1-000003-A05	5	5					0.823861
178	220761	NPS-D1-000003-B05	5.1	5					0.582656
179	260321	NPS-D1-000003-C05	5.2	5					0.655968
180	220871	NPS-D1-000003-D05	5.3	5					0.809538
181	206530	NPS-D1-000003-E05	5.6	5					No TF
182	220791	NPS-D1-000003-F05	5	5					1.04334
183	220903	NPS-D1-000003-G05	5.4	5					1.29278
184	209576	NPS-D1-000003-H05	4.51	5					0.81545
185	209592	NPS-D1-000003-A06	4.9	5					0.66995
186	220816	NPS-D1-000003-B06	5.3	5					0.546484
187	220728	NPS-D1-000003-C06	5	5					0.632072
188	203448	NPS-D1-000003-D06	5.4	5					0.647137
189	209590	NPS-D1-000003-E06	5.2	5					1.1213
190	226625	NPS-D1-000003-F06	5	5					0.999065
191	220775	NPS-D1-000003-G06	5.1	5					0.876475
192	220798	NPS-D1-000003-H06	5	5					0.706352
193	219327	NPS-D1-000003-A07	5.1	5					1.45082
194	95731	NPS-D1-000003-B07	4.99	5					1.63942		No TF	1.9
195	423423	NPS-D1-000003-C07	5.11	5					1.46485
196	423424	NPS-D1-000003-D07	4.92	5					1.36041
197	423410	NPS-D1-000003-E07	5.01	5					0.889328
198	423368	NPS-D1-000003-F07	5.36	5					0.872849
199	423354	NPS-D1-000003-G07	4.64	5					0.699976
200	423277	NPS-D1-000003-H07	4.57	5					0.685795
201	423262	NPS-D1-000003-A08	5.13	5					0.840881
202	206526	NPS-D1-000003-B08	5.4	5					1.13386
203	226609	NPS-D1-000003-C08	4.8	5					1.54318
204	95799	NPS-D1-000003-D08	4.99	5					0.524698
205	209560	NPS-D1-000003-E08	5.32	5					0.566736
206	220752	NPS-D1-000003-F08	4.9	5					0.547232
207	220854	NPS-D1-000003-G08	5.2	5					1.18902
208	91467	NPS-D1-000003-H08	5.1	5					1.00188
209	91875	NPS-D1-000003-A09	5.06	5					1.35428
210	220842	NPS-D1-000003-B09	4.9	5					0.621745
211	220794	NPS-D1-000003-C09	5.1	5					0.478469
212	220883	NPS-D1-000003-D09	5	5					0.605985
213	220876	NPS-D1-000003-E09	5.3	5					0.597231
214	95687	NPS-D1-000003-F09	5.02	5					1.03397
215	220865	NPS-D1-000003-G09	5.4	5					1.29599
216	91637	NPS-D1-000003-H09	4.84	5					0.667728
217	219348	NPS-D1-000003-A10	4.8	5					0.734358
218	220846	NPS-D1-000003-B10	5.1	5					0.591679
219	220855	NPS-D1-000003-C10	5.1	5					0.570743
220	220890	NPS-D1-000003-D10	5.3	5					0.672455
221	91968	NPS-D1-000003-E10	4.94	5					1.09011
222	220840	NPS-D1-000003-F10	4.7	5					0.926264
223	91981	NPS-D1-000003-G10	5.04	5					0.523538
224	220845	NPS-D1-000003-H10	4.9	5					0.431209
225	95706	NPS-D1-000003-A11	4.9	5					0.827615
226	206507	NPS-D1-000003-B11	5.8	5					0.855396
227	220837	NPS-D1-000003-C11	4.8	5					0.93706
228	220801	NPS-D1-000003-D11	4.2	5					1.40395
229	260786	NPS-D1-000003-E11	4.9	5					0.827038
230	226606	NPS-D1-000003-F11	5.1	5					0.987754
231	226617	NPS-D1-000003-G11	5.2	5					0.888448
232	226642	NPS-D1-000003-H11	5.3	5					0.901255
233	220750	NPS-D1-000003-A12	5.2	5					0.83309
234	209562	NPS-D1-000003-B12	5.06	5					0.863322
235	219378	NPS-D1-000003-C12	5.5	5					0.933829
236	220737	NPS-D1-000003-D12	4.7	5					2.34854		0.72	No TF
237	220772	NPS-D1-000003-E12	5.2	5					0.846676
238	91494	NPS-D1-000003-F12	5.14	5					1.05036
239	91515	NPS-D1-000003-G12	4.91	5					1.08845
240	220821	NPS-D1-000003-H12	5.1	5					1.15529
241	91828	NPS-D1-000004-A03	5.04	5					0.942607
242	209561	NPS-D1-000004-B03	4.9	5					0.976875
243	220888	NPS-D1-000004-C03	5.2	5					0.775623
244	206535	NPS-D1-000004-D03	4.9	5					0.868363
245	95752	NPS-D1-000004-E03	5.02	5					0.769002
246	92131	NPS-D1-000004-F03	5.08	5					1.0708
247	206532	NPS-D1-000004-G03	5.3	5					No TF
248	91948	NPS-D1-000004-H03	4.94	5					0.738491
249	260339	NPS-D1-000004-A04	5.2	5					0.929473
250	220788	NPS-D1-000004-B04	5	5					0.782622
251	220858	NPS-D1-000004-C04	5	5					1.09183
252	260329	NPS-D1-000004-D04	4.7	5					0.846628
253	220897	NPS-D1-000004-E04	5.1	5					0.839764
254	220710	NPS-D1-000004-F04	4.8	5					0.916988
255	91881	NPS-D1-000004-G04	5.1	5					1.20655
256	220850	NPS-D1-000004-H04	5.2	5					0.790765
257	260327	NPS-D1-000004-A05	4.9	5					0.848563
258	260799	NPS-D1-000004-B05	5.1	5					0.733229
259	91830	NPS-D1-000004-C05	5.05	5					0.929107
260	219329	NPS-D1-000004-D05	5.1	5					1.02391
261	220774	NPS-D1-000004-E05	5.1	5					0.860027
262	92290	NPS-D1-000004-F05	5.03	5					0.716674
263	220887	NPS-D1-000004-G05	5.3	5					0.752819
264	91939	NPS-D1-000004-H05	5.1	5					0.974613
265	226632	NPS-D1-000004-A06	5	5					0.792858
266	220844	NPS-D1-000004-B06	4.9	5					1.06381
267	206506	NPS-D1-000004-C06	5.2	5					0.906176
268	220805	NPS-D1-000004-D06	5	5					0.896528
269	95618	NPS-D1-000004-E06	4.96	5					1.85694		No TF	1.71
270	260308	NPS-D1-000004-F06	5.3	5					1.34159
271	91891	NPS-D1-000004-G06	5.29	5					0.680393
272	91841	NPS-D1-000004-H06	4.97	5					0.759148
273	220708	NPS-D1-000004-A07	5.1	5					0.625064
274	220776	NPS-D1-000004-B07	5	5					0.950697
275	95745	NPS-D1-000004-C07	4.97	5					0.809379
276	91928	NPS-D1-000004-D07	4.92	5					1.54584
277	220771	NPS-D1-000004-E07	5.1	5					0.560631
278	96035	NPS-D1-000004-F07	5.04	5					0.779964
279	226634	NPS-D1-000004-G07	5.3	5					0.82099
280	91874	NPS-D1-000004-H07	5.02	5					0.942127
281	220808	NPS-D1-000004-A08	5.2	5					0.778638
282	219386	NPS-D1-000004-B08	5.2	5					1.40095
283	95954	NPS-D1-000004-C08	5.04	5					0.993658
284	226638	NPS-D1-000004-D08	5.3	5					0.870668
285	226604	NPS-D1-000004-E08	5.2	5					0.656512
286	220851	NPS-D1-000004-F08	4.8	5					No TF
287	220807	NPS-D1-000004-G08	4.8	5					0.880432
288	219322	NPS-D1-000004-H08	5.3	5					0.734516
289	416195	NPS-D1-000004-A09	5.21	5					0.549542
290	416211	NPS-D1-000004-B09	4.89	5					0.702965
291	416219	NPS-D1-000004-C09	4.84	5					0.841861
292	425326	NPS-D1-000004-D09	4.6	5					1.01434
293	416188	NPS-D1-000004-E09	4.94	5					0.575461
294	416204	NPS-D1-000004-F09	4.8	5					0.336136		1.19	1.02
295	416212	NPS-D1-000004-G09	4.74	5					0.823677
296	209568	NPS-D1-000004-H09	4.85	5					0.866122
297	220763	NPS-D1-000004-A10	4.8	5					1.02246
298	206531	NPS-D1-000004-B10	5	5					No TF
299	92338	NPS-D1-000004-C10	4.93	5					No TF
300	226611	NPS-D1-000004-D10	4.9	5					1.33108
301	206509	NPS-D1-000004-E10	5.4	5					0.484333
302	95930	NPS-D1-000004-F10	4.99	5					1.28077
303	260783	NPS-D1-000004-G10	5.1	5					0.976052
304	220902	NPS-D1-000004-H10	4.7	5					1.32309
305	220735	NPS-D1-000004-A11	5.2	5					No TF
306	260322	NPS-D1-000004-B11	4.7	5					0.610785
307	95774	NPS-D1-000004-C11	5.04	5					0.533561
308	206527	NPS-D1-000004-D11	5.4	5					1.1479
309	91929	NPS-D1-000004-E11	5.09	5					0.848216
310	220733	NPS-D1-000004-F11	5.2	5					1.31386
311	416236	NPS-D1-000004-G11	5.21	5					1.15535
312	416244	NPS-D1-000004-H11	4.64	5					0.628297
313	92270	NPS-D1-000004-A12	5.14	5					0.959148
314	95632	NPS-D1-000004-B12	4.84	5					0.643443
315	206525	NPS-D1-000004-C12	5.6	5					0.773921
316	92366	NPS-D1-000004-D12	5	5					1.26603
317	206514	NPS-D1-000004-E12	5.3	5					0.769705
318	220785	NPS-D1-000004-F12	5.1	5					0.67302
319	226633	NPS-D1-000004-G12	5.4	5					0.782546
320	220753	NPS-D1-000004-H12	5.6	5					0.764533
321	220777	NPS-D1-000005-A03	5.2	5					0.604054
322	219366	NPS-D1-000005-B03	5.5	5					0.989724
323	219345	NPS-D1-000005-C03	4.9	5					No TF
324	226614	NPS-D1-000005-D03	5.1	5					0.897766
325	220717	NPS-D1-000005-E03	5.2	5					0.315184		0.9
326	220834	NPS-D1-000005-F03	4.9	5					0.366394		0.99
327	209566	NPS-D1-000005-G03	5.28	5					0.582165		1.15
328	206542	NPS-D1-000005-H03	4.6	5					0.293934		0.96	1.04
329	260330	NPS-D1-000005-A04	5	5					0.449922		0.84
330	95985	NPS-D1-000005-B04	5.06	5					0.304654		0.76
331	91664	NPS-D1-000005-C04	4.84	5					0.346402		0.81
332	91688	NPS-D1-000005-D04	5.14	5					0.281468		0.88
333	220841	NPS-D1-000005-E04	4.9	5					0.278872		0.77
334	91589	NPS-D1-000005-F04	4.93	5					0.30578		0.93
335	260784	NPS-D1-000005-G04	5.1	5					0.296818		0.88
336	91789	NPS-D1-000005-H04	5.08	5					0.26657		0.88
337	219395	NPS-D1-000005-A05	5.2	5					0.899542
338	260791	NPS-D1-000005-B05	5	5					1.01232
339	91654	NPS-D1-000005-C05	4.89	5					No TF	0.504311
340	91800	NPS-D1-000005-D05	4.99	5					0.723655
341	220878	NPS-D1-000005-E05	4.9	5					1.21137
342	95905	NPS-D1-000005-F05	4.9	5					0.864015
343	91817	NPS-D1-000005-G05	4.97	5					0.910562
344	220782	NPS-D1-000005-H05	5.6	5					0.783996
345	92444	NPS-D1-000005-A06	5.08	5					No TF	2.31595	2.68972	3.14699
346	226621	NPS-D1-000005-B06	4.9	5					0.887151
347	260776	NPS-D1-000005-C06	5.1	5					0.660821
348	220815	NPS-D1-000005-D06	5.1	5					0.830916
349	226628	NPS-D1-000005-E06	5.1	5					0.642794
350	220742	NPS-D1-000005-F06	4.8	5					0.556982
351	92051	NPS-D1-000005-G06	4.97	5					No TF	0.452043
352	209579	NPS-D1-000005-H06	4.95	5					0.667875
353	91582	NPS-D1-000005-A07	5.18	5					0.638111
354	91848	NPS-D1-000005-B07	5.02	5					0.710874
355	220899	NPS-D1-000005-C07	4.7	5					0.77352
356	220714	NPS-D1-000005-D07	5.1	5					0.622982
357	209593	NPS-D1-000005-E07	5	5					No TF	0.29228
358	92064	NPS-D1-000005-F07	4.9	5					0.469498
359	220886	NPS-D1-000005-G07	4.5	5					0.540425
360	226612	NPS-D1-000005-H07	4.7	5					0.708534
361	226627	NPS-D1-000005-A08	4.7	5					0.89511
362	92291	NPS-D1-000005-B08	4.91	5					0.630188
363	91593	NPS-D1-000005-C08	4.98	5					No TF	0.444867
364	226636	NPS-D1-000005-D08	4.9	5					0.457062
365	220795	NPS-D1-000005-E08	5.2	5					0.868112
366	220739	NPS-D1-000005-F08	5.1	5					0.480594
367	220732	NPS-D1-000005-G08	4.8	5					0.548265
368	226600	NPS-D1-000005-H08	5	5					0.837115
369	260312	NPS-D1-000005-A09	5.3	5					No TF	0.342243
370	220849	NPS-D1-000005-B09	5.3	5					0.426605		0.92	1.14
371	209582	NPS-D1-000005-C09	5.44	5					0.485117
372	220884	NPS-D1-000005-D09	5.2	5					0.462336
373	220767	NPS-D1-000005-E09	4.9	5					No TF
374	260347	NPS-D1-000005-F09	5	5					0.560666
375	220727	NPS-D1-000005-G09	5	5					No TF	0.374572			`
376	260309	NPS-D1-000005-H09	5.3	5					0.405611		1.01	0.89
377	260315	NPS-D1-000005-A10	5.4	5					0.424279
378	226603	NPS-D1-000005-B10	4.9	5					0.487986
379	220719	NPS-D1-000005-C10	4.8	5					0.447634
380	220838	NPS-D1-000005-D10	4.5	5					0.567628
381	226626	NPS-D1-000005-E10	4.8	5					0.542647
382	226619	NPS-D1-000005-F10	4.9	5					0.464633
383	91790	NPS-D1-000005-G10	4.96	5					0.495606
384	220768	NPS-D1-000005-H10	4.9	5					0.46448
385	220802	NPS-D1-000005-A11	5	5					0.503298
386	209558	NPS-D1-000005-B11	5.5	5					No TF
387	220718	NPS-D1-000005-C11	4.9	5					0.4571
388	220747	NPS-D1-000005-D11	5.3	5					No TF
389	91798	NPS-D1-000005-E11	5.01	5					0.596988
390	220715	NPS-D1-000005-F11	5.1	5					0.473927
391	260336	NPS-D1-000005-G11	5	5					0.625009
392	260343	NPS-D1-000005-H11	5.2	5					0.48736
393	220713	NPS-D1-000005-A12	5	5					1.06494
394	220756	NPS-D1-000005-B12	5.2	5					1.39898
395	92303	NPS-D1-000005-C12	4.99	5					1.36278
396	96113	NPS-D1-000005-D12	4.71	5					1.01969
397	206500	NPS-D1-000005-E12	4.6	5					1.05341
398	260324	NPS-D1-000005-F12	4.8	5					1.0948
399	206522	NPS-D1-000005-G12	5.3	5					0.981013
400	91857	NPS-D1-000005-H12	4.97	5					1.25468
401	416146	NPS-D1-000006-A03	4.88	5					0.909404
402	416764	NPS-D1-000006-B03	5.06	5					No TF
403	416153	NPS-D1-000006-C03	4.76	5					1.01096
404	416768	NPS-D1-000006-D03	4.77	5					0.965455
405	416776	NPS-D1-000006-E03	5.06	5					No TF
406	416800	NPS-D1-000006-F03	5.03	5					0.945443
407	416152	NPS-D1-000006-G03	4.75	5					1.00649
408	416761	NPS-D1-000006-H03	5.1	5					0.811575
409	416793	NPS-D1-000006-A04	4.96	5					0.877919
410	416529	NPS-D1-000006-B04	4.97	5					0.928408
411	416537	NPS-D1-000006-C04	4.74	5					0.907452
412	416545	NPS-D1-000006-D04	4.89	5					1.10174
413	416561	NPS-D1-000006-E04	5.02	5					0.762706
414	416585	NPS-D1-000006-F04	5.13	5					2.49479		2.62	1.73
415	416183	NPS-D1-000006-G04	5.04	5					0.926795
416	416180	NPS-D1-000006-H04	4.88	5					0.870242
417	416184	NPS-D1-000006-A05	5.07	5					0.774511
418	416185	NPS-D1-000006-B05	5.36	5					0.802239
419	416320	NPS-D1-000006-C05	4.84	5					0.58834
420	416273	NPS-D1-000006-D05	5.11	5					0.555461
421	416289	NPS-D1-000006-E05	5.22	5					0.761362
422	416313	NPS-D1-000006-F05	5.11	5					0.823315
423	416194	NPS-D1-000006-G05	4.9	5					0.772184
424	416202	NPS-D1-000006-H05	5.22	5					0.713881
425	416208	NPS-D1-000006-A06	4.55	5					0.715094
426	416224	NPS-D1-000006-B06	5.08	5					0.77402
427	416256	NPS-D1-000006-C06	5.2	5					0.670737
428	416217	NPS-D1-000006-D06	5.23	5					0.807966
429	416259	NPS-D1-000006-E06	4.73	5					0.757849
430	416501	NPS-D1-000006-F06	4.8	5					0.957719
431	417009	NPS-D1-000006-G06	4.96	5					0.606017
432	416283	NPS-D1-000006-H06	5.16	5					0.807167
433	416291	NPS-D1-000006-A07	4.83	5					0.808247
434	416315	NPS-D1-000006-B07	4.95	5					2.07071		No TF	1.94
435	416323	NPS-D1-000006-C07	5.19	5					0.958832
436	416268	NPS-D1-000006-D07	4.91	5					0.65952
437	416284	NPS-D1-000006-E07	5.01	5					0.791121
438	416300	NPS-D1-000006-F07	5.2	5					1.3447
439	416324	NPS-D1-000006-G07	4.67	5					1.14555
440	416332	NPS-D1-000006-H07	4.91	5					0.733762
441	416277	NPS-D1-000006-A08	5.43	5					0.953606
442	416301	NPS-D1-000006-B08	4.93	5					0.978791
443	416325	NPS-D1-000006-C08	5.12	5					1.13989
444	416278	NPS-D1-000006-D08	4.97	5					0.758764
445	416286	NPS-D1-000006-E08	4.75	5					0.572107		0.89	0.9
446	416302	NPS-D1-000006-F08	4.89	5					0.995694
447	416326	NPS-D1-000006-G08	4.8	5					1.35861
448	416279	NPS-D1-000006-H08	4.78	5					0.870684
449	416287	NPS-D1-000006-A09	4.94	5					1.05803
450	416295	NPS-D1-000006-B09	4.95	5					0.979415
451	416303	NPS-D1-000006-C09	4.96	5					0.937761
452	416319	NPS-D1-000006-D09	4.94	5					0.909123
453	416343	NPS-D1-000006-E09	4.75	5					0.862854
454	416272	NPS-D1-000006-F09	5.11	5					No TF
455	416288	NPS-D1-000006-G09	4.8	5					0.906833
456	416296	NPS-D1-000006-H09	4.9	5					0.882726
457	416377	NPS-D1-000006-A10	4.83	5					0.944173
458	416401	NPS-D1-000006-B10	4.83	5					0.945172
459	416417	NPS-D1-000006-C10	4.96	5					1.29408
460	416274	NPS-D1-000006-D10	5.13	5					0.843526
461	416290	NPS-D1-000006-E10	4.99	5					No TF
462	416322	NPS-D1-000006-F10	5.25	5					0.713915
463	416440	NPS-D1-000006-G10	5.22	5					0.970781
464	416422	NPS-D1-000006-H10	5.05	5					0.72901
465	416459	NPS-D1-000006-A11	5.19	5					1.05669
466	416460	NPS-D1-000006-B11	5.27	5					0.851563
467	416492	NPS-D1-000006-C11	5.1	5					0.888211
468	416503	NPS-D1-000006-D11	4.78	5					0.860242
469	416445	NPS-D1-000006-E11	4.9	5					No TF
470	416477	NPS-D1-000006-F11	5.34	5					1.07462
471	416488	NPS-D1-000006-G11	5.18	5					1.71089
472	416494	NPS-D1-000006-H11	4.89	5					1.40349
473	416431	NPS-D1-000006-A12	4.85	5					0.96926
474	416495	NPS-D1-000006-B12	5.1	5					1.02532
475	425452	NPS-D1-000006-C12	5.27	5					0.859135
476	425352	NPS-D1-000006-D12	4.61	5					0.875094
477	425449	NPS-D1-000006-E12	5.25	5					1.73985
478	425347	NPS-D1-000006-F12	4.78	5					0.993502
479	425351	NPS-D1-000006-G12	5.36	5					0.906771
480	425322	NPS-D1-000006-H12	4.72	5					0.928714
481	260785	NPS-D1-000007-A03	5.3	5					No TF	No TF
482	260326	NPS-D1-000007-B03	5.1	5					0.725751	No TF
483	260314	NPS-D1-000007-C03	4.8	5					0.863329	No TF
484	92423	NPS-D1-000007-D03	4.87	5					0.616309	No TF	0.92	1.15
485	219358	NPS-D1-000007-E03	5.2	5					No TF	No TF
486	91850	NPS-D1-000007-F03	4.99	5					0.65426	No TF
487	220804	NPS-D1-000007-G03	4.7	5					No TF	No TF
488	260781	NPS-D1-000007-H03	5.2	5					0.674961	No TF
489	220864	NPS-D1-000007-A04	4.7	5					0.653877	No TF
490	220859	NPS-D1-000007-B04	4.8	5					0.84571	No TF
491	220825	NPS-D1-000007-C04	4.9	5					0.773251	No TF
492	260805	NPS-D1-000007-D04	5	5					1.05069	No TF
493	220895	NPS-D1-000007-E04	5.3	5					No TF	No TF
494	95963	NPS-D1-000007-F04	5.06	5					0.654919	No TF
495	206518	NPS-D1-000007-G04	4.9	5					0.767796	No TF
496	96054	NPS-D1-000007-H04	4.99	5					0.932593	No TF
497	220773	NPS-D1-000007-A05	5	5					0.618596	No TF
498	220720	NPS-D1-000007-B05	5.2	5					0.750865	No TF
499	220826	NPS-D1-000007-C05	5	5					No TF	No TF
500	220893	NPS-D1-000007-D05	4.8	5					0.721119	No TF
501	226639	NPS-D1-000007-E05	4.9	5					1.35789	No TF	0.69
502	226630	NPS-D1-000007-F05	4.6	5					0.717325	No TF
503	95981	NPS-D1-000007-G05	4.87	5					0.554999	No TF	0.81	0.79
504	220762	NPS-D1-000007-H05	5.1	5					0.592479	No TF
505	219391	NPS-D1-000007-A06	5	5					No TF	No TF
506	220745	NPS-D1-000007-B06	5.1	5					0.606051	No TF
507	91380	NPS-D1-000007-C06	5.02	5					0.65581	No TF
508	220748	NPS-D1-000007-D06	5.2	5					No TF	No TF
509	220889	NPS-D1-000007-E06	4.8	5					0.505724	No TF
510	96011	NPS-D1-000007-F06	4.95	5					0.533797	No TF	0.95	0.99
511	220779	NPS-D1-000007-G06	5.1	5					No TF	No TF
512	220725	NPS-D1-000007-H06	4.7	5					0.837167	No TF
513	417095	NPS-D1-000007-A07	4.75	5					0.648069	No TF
514	417121	NPS-D1-000007-B07	4.85	5					1.18555	No TF
515	417301	NPS-D1-000007-C07	4.62	5					0.801617	No TF
516	417278	NPS-D1-000007-D07	5.25	5					0.828677	No TF
517	417264	NPS-D1-000007-E07	4.73	5					No TF	No TF
518	417296	NPS-D1-000007-F07	4.99	5					No TF	No TF
519	417305	NPS-D1-000007-G07	4.57	5					No TF	No TF
520	424962	NPS-D1-000007-H07	4.86	5					No TF	No TF
521	424978	NPS-D1-000007-A08	5.1	5					No TF	No TF
522	424996	NPS-D1-000007-B08	5.37	5					1.7864	No TF	0.64	0.59
523	226643	NPS-D1-000007-C08	5	5					No TF	No TF
524	91741	NPS-D1-000007-D08	5.1	5					0.572935	No TF
525	91931	NPS-D1-000007-E08	5.09	5					No TF	No TF
526	206533	NPS-D1-000007-F08	5.5	5					No TF	No TF
527	220770	NPS-D1-000007-G08	5.4	5					No TF	No TF
528	226602	NPS-D1-000007-H08	5.1	5					No TF	No TF
529	95724	NPS-D1-000007-A09	4.97	5					No TF	No TF
530	209584	NPS-D1-000007-B09	5.33	5					No TF	No TF
531	260806	NPS-D1-000007-C09	4.8	5					No TF	No TF
532	226615	NPS-D1-000007-D09	4.7	5					No TF	No TF
533	91834	NPS-D1-000007-E09	5.06	5					No TF	No TF
534	91879	NPS-D1-000007-F09	5.11	5					No TF	No TF
535	220787	NPS-D1-000007-G09	4.8	5					No TF	No TF
536	95616	NPS-D1-000007-H09	4.89	5					No TF	No TF
537	220781	NPS-D1-000007-A10	5.4	5					No TF	2.99344
538	209573	NPS-D1-000007-B10	5.2	5					No TF	3.29472
539	95720	NPS-D1-000007-C10	5.14	5					1.03101	2.50445
540	416455	NPS-D1-000007-D10	4.57	5					No TF	2.08965
541	91425	NPS-D1-000007-E10	4.99	5					No TF	1.77194
542	92095	NPS-D1-000007-F10	4.89	5					No TF	2.55659
543	220736	NPS-D1-000007-G10	5.2	5					No TF	0.666523	1.18	1.8
544	226608	NPS-D1-000007-H10	5.4	5					0.738513	3.07943	0.93	0.84
545	226624	NPS-D1-000007-A11	5.4	5					0.858718	2.59979
546	220828	NPS-D1-000007-B11	4.8	5					0.928899	2.3323
547	226613	NPS-D1-000007-C11	4.7	5					0.953363	2.08967
548	220778	NPS-D1-000007-D11	5.1	5					No TF	2.64507
549	95924	NPS-D1-000007-E11	5.06	5					No TF	4.05854	0.95	0.76
550	226610	NPS-D1-000007-F11	4.7	5					0.933531	2.70184
551	220780	NPS-D1-000007-G11	5	5					1.40474	2.96208
552	92341	NPS-D1-000007-H11	5.03	5					No TF	No TF
553	220873	NPS-D1-000007-A12	5	5					1.91733	2.78873	0.61	0.51
554	220818	NPS-D1-000007-B12	4.9	5					No TF	1.53941
555	220706	NPS-D1-000007-C12	5.2	5					No TF	2.69637
556	91944	NPS-D1-000007-D12	4.87	5					No TF	4.25595	0.76	0.65
557	260320	NPS-D1-000007-E12	5.1	5					1.52297	4.36102	0.68	0.5
558	226640	NPS-D1-000007-F12	4.7	5					1.67416	No TF	0.76	0.59
559	220874	NPS-D1-000007-G12	4.7	5					2.1174	2.17753	0.56
560	91428	NPS-D1-000007-H12	5.04	5					No TF	1.53508
561	416496	NPS-D1-000008-A03	5.23	5					No TF	1.60113
562	416504	NPS-D1-000008-B03	5.16	5					No TF	1.11471
563	416441	NPS-D1-000008-C03	4.61	5					No TF	0.998283
564	416481	NPS-D1-000008-D03	5.14	5					No TF	0.737984
565	416574	NPS-D1-000008-E03	4.98	5					No TF	1.12105
566	416582	NPS-D1-000008-F03	5.32	5					No TF	1.32913
567	416487	NPS-D1-000008-G03	5.06	5					No TF	1.29689
568	416519	NPS-D1-000008-H03	4.84	5					No TF	1.37564
569	416527	NPS-D1-000008-A04	4.63	5					No TF	0.9744
570	416543	NPS-D1-000008-B04	5.1	5					No TF	1.58689
571	416575	NPS-D1-000008-C04	5.32	5					No TF	1.67015
572	416512	NPS-D1-000008-D04	4.83	5					No TF	2.07272
573	416528	NPS-D1-000008-E04	5.4	5					No TF	0.885565
574	416536	NPS-D1-000008-F04	4.93	5					No TF	1.09458
575	416552	NPS-D1-000008-G04	4.6	5					No TF	0.914297
576	416576	NPS-D1-000008-H04	5.28	5					No TF	No TF
577	416521	NPS-D1-000008-A05	5.02	5					No TF	1.04651
578	416580	NPS-D1-000008-B05	5.28	5					No TF	1.18448
579	416525	NPS-D1-000008-C05	5.28	5					No TF	0.97511
580	416533	NPS-D1-000008-D05	5.41	5					No TF	0.919841
581	416541	NPS-D1-000008-E05	5.31	5					No TF	0.702381
582	416573	NPS-D1-000008-F05	5.2	5					No TF	1.17017
583	416581	NPS-D1-000008-G05	5.21	5					No TF	1.35723
584	416518	NPS-D1-000008-H05	4.94	5					No TF	1.48467
585	416542	NPS-D1-000008-A06	4.67	5					No TF	0.819302
586	416702	NPS-D1-000008-B06	4.98	5					No TF	1.03681
587	416718	NPS-D1-000008-C06	4.92	5					No TF	1.20293
588	416734	NPS-D1-000008-D06	5.1	5					No TF	1.06419
589	416678	NPS-D1-000008-E06	4.87	5					No TF	1.15951
590	416671	NPS-D1-000008-F06	5.1	5					No TF	1.47837
591	416719	NPS-D1-000008-G06	4.98	5					No TF	1.12183
592	416672	NPS-D1-000008-H06	5.18	5					No TF	1.07025
593	416697	NPS-D1-000008-A07	4.81	5					No TF	1.14346
594	416594	NPS-D1-000008-B07	4.76	5					0.51751	1.23415
595	416602	NPS-D1-000008-C07	4.98	5					No TF	No TF
596	416610	NPS-D1-000008-D07	4.67	5					0.53287	1.20999
597	416599	NPS-D1-000008-E07	4.9	5					No TF	1.14345
598	416623	NPS-D1-000008-F07	5.45	5					No TF	1.08912
599	416655	NPS-D1-000008-G07	5.14	5					No TF	0.645752
600	416600	NPS-D1-000008-H07	4.92	5					No TF	No TF
601	416656	NPS-D1-000008-A08	4.94	5					0.915807	1.36999
602	416642	NPS-D1-000008-B08	5.07	5					No TF	1.1356
603	416658	NPS-D1-000008-C08	5.06	5					0.792968	1.20894
604	416643	NPS-D1-000008-D08	4.98	5					No TF	1.22111
605	416628	NPS-D1-000008-E08	5.02	5					No TF	0.811599
606	416636	NPS-D1-000008-F08	5	5					No TF	1.15913
607	416660	NPS-D1-000008-G08	5.01	5					No TF	No TF
608	416661	NPS-D1-000008-H08	4.89	5					0.392203	0.571828	0.68	0.8
609	416638	NPS-D1-000008-A09	5.32	5					0.708266	0.936804
610	416801	NPS-D1-000008-B09	5.29	5					No TF	0.433626	0.89	0.98
611	416674	NPS-D1-000008-C09	5.1	5					No TF	0.679453
612	416706	NPS-D1-000008-D09	4.99	5					0.258344	0.99504	0.75	0.83
613	416812	NPS-D1-000008-E09	5.09	5					No TF	0.862691
614	416765	NPS-D1-000008-F09	5.16	5					No TF	No TF
615	416758	NPS-D1-000008-G09	5.05	5					No TF	No TF
616	416766	NPS-D1-000008-H09	4.77	5					No TF	0.905035
617	416798	NPS-D1-000008-A10	5.21	5					No TF	1.22671
618	416822	NPS-D1-000008-B10	4.94	5					No TF	0.648215
619	416767	NPS-D1-000008-C10	5.17	5					No TF	0.696602
620	416775	NPS-D1-000008-D10	4.79	5					0.696549	0.83953
621	424347	NPS-D1-000008-E10	4.85	5					No TF	0.8336
622	416853	NPS-D1-000008-F10	4.99	5					0.772542	0.971243
623	416862	NPS-D1-000008-G10	4.94	5					No TF	0.569783	1.18
624	416839	NPS-D1-000008-H10	4.94	5					0.5768	0.643213	0.75	0.87
625	416847	NPS-D1-000008-A11	4.96	5					0.72185	0.737133
626	416871	NPS-D1-000008-B11	4.57	5					No TF	No TF
627	416899	NPS-D1-000008-C11	4.95	5					No TF	No TF
628	416844	NPS-D1-000008-D11	5.09	5					No TF	No TF
629	416852	NPS-D1-000008-E11	4.96	5					No TF	0.884454
630	416924	NPS-D1-000008-F11	5.42	5					No TF	2.38792	2.13148	1.95921
631	416964	NPS-D1-000008-G11	4.82	5					0.902219	1.17673
632	416980	NPS-D1-000008-H11	4.96	5					0.789975	1.05384
633	416937	NPS-D1-000008-A12	4.97	5					No TF	0.913833
634	417026	NPS-D1-000008-B12	5	5					No TF	No TF
635	417028	NPS-D1-000008-C12	5.15	5					No TF	1.18101
636	416989	NPS-D1-000008-D12	4.75	5					No TF	1.70242	No TF
637	417029	NPS-D1-000008-E12	5.3	5					No TF	1.3974
638	416990	NPS-D1-000008-F12	4.84	5					No TF	0.820058
639	417014	NPS-D1-000008-G12	4.98	5					No TF	No TF
640	417030	NPS-D1-000008-H12	5.09	5					No TF	No TF
641	417015	NPS-D1-000009-A03	4.7	5					0.577726
642	417031	NPS-D1-000009-B03	4.81	5					1.06565
643	417067	NPS-D1-000009-C03	5.29	5					0.621189
644	417084	NPS-D1-000009-D03	5.31	5					0.778601
645	417150	NPS-D1-000009-E03	4.87	5					0.56648
646	417182	NPS-D1-000009-F03	4.7	5					0.644688
647	417192	NPS-D1-000009-G03	4.82	5					0.797508
648	417266	NPS-D1-000009-H03	5.23	5					0.475214
649	417267	NPS-D1-000009-A04	5.01	5					0.753339
650	417300	NPS-D1-000009-B04	4.84	5					0.479735
651	417307	NPS-D1-000009-C04	5.21	5					0.476345
652	417319	NPS-D1-000009-D04	4.83	5					0.643832
653	417376	NPS-D1-000009-E04	4.95	5					0.60979
654	417329	NPS-D1-000009-F04	4.85	5					0.737033
655	417386	NPS-D1-000009-G04	5.09	5					0.896798
656	417387	NPS-D1-000009-H04	5.06	5					0.810504
657	417487	NPS-D1-000009-A05	4.82	5					1.14601
658	417490	NPS-D1-000009-B05	5.18	5					0.900618
659	417568	NPS-D1-000009-C05	4.65	5					0.874425
660	417619	NPS-D1-000009-D05	5.24	5					0.847883
661	417625	NPS-D1-000009-E05	4.53	5					0.791945
662	417626	NPS-D1-000009-F05	4.85	5					1.11587
663	417627	NPS-D1-000009-G05	5.18	5					0.948311
664	417628	NPS-D1-000009-H05	5.03	5					0.691505
665	417678	NPS-D1-000009-A06	5.4	5					0.854811
666	417663	NPS-D1-000009-B06	5.01	5					0.880641
667	417695	NPS-D1-000009-C06	4.98	5					1.01372
668	417736	NPS-D1-000009-D06	4.74	5					0.938902
669	417757	NPS-D1-000009-E06	5.27	5					0.754207
670	417807	NPS-D1-000009-F06	4.54	5					0.974159
671	418097	NPS-D1-000009-G06	5.14	5					0.767781
672	423188	NPS-D1-000009-H06	4.85	5					0.916757
673	423149	NPS-D1-000009-A07	5.32	5					0.844236
674	423157	NPS-D1-000009-B07	5.12	5					0.796908
675	423165	NPS-D1-000009-C07	5.24	5					0.827376
676	423173	NPS-D1-000009-D07	4.75	5					0.842293
677	423150	NPS-D1-000009-E07	4.54	5					0.644102
678	425295	NPS-D1-000009-F07	4.74	5					0.775383
679	425296	NPS-D1-000009-G07	4.66	5					0.978949
680	423206	NPS-D1-000009-H07	4.82	5					0.84687
681	423151	NPS-D1-000009-A08	5.05	5					0.768525
682	423159	NPS-D1-000009-B08	4.76	5					0.872651
683	423167	NPS-D1-000009-C08	5.22	5					0.951178
684	423152	NPS-D1-000009-D08	5.27	5					1.48075
685	423160	NPS-D1-000009-E08	5.3	5					0.800973
686	423168	NPS-D1-000009-F08	4.74	5					0.86058
687	423153	NPS-D1-000009-G08	5.14	5					0.707731
688	423161	NPS-D1-000009-H08	5.08	5					0.674493
689	423169	NPS-D1-000009-A09	4.72	5					0.37568
690	423154	NPS-D1-000009-B09	4.94	5					1.22329
691	203874	NPS-D1-000009-C09	10	5					0.95889
692	205376	NPS-D1-000009-D09	10	5					0.738206
693	203867	NPS-D1-000009-E09	10	5					1.91105		0.72	0.8
694	204954	NPS-D1-000009-F09	10	5					0.781439
695	205037	NPS-D1-000009-G09	10	5					0.695319
696	204794	NPS-D1-000009-H09	10	5					1.41899
697	204852	NPS-D1-000009-A10	10	5					0.716257
698	203854	NPS-D1-000009-B10	10	5					0.774424
699	203857	NPS-D1-000009-C10	10	5					0.875832
700	204215	NPS-D1-000009-D10	10	5					1.80125		1.1	0.66
701	204765	NPS-D1-000009-E10	10	5					0.690531
702	205279	NPS-D1-000009-F10	10	5					No TF
703	204102	NPS-D1-000009-G10	10	5					No TF
704	205840	NPS-D1-000009-H10	10	5					0.642586
705	204423	NPS-D1-000009-A11	10	5					0.669242
706	203981	NPS-D1-000009-B11	10	5					0.668127
707	205914	NPS-D1-000009-C11	10	5					0.640849
708	205029	NPS-D1-000009-D11	10	5					0.900903
709	203943	NPS-D1-000009-E11	10	5					0.56885
710	204174	NPS-D1-000009-F11	10	5					No TF
711	204086	NPS-D1-000009-G11	10	5					0.567311
712	204749	NPS-D1-000009-H11	10	5					0.502646
713	205549	NPS-D1-000009-A12	10	5					0.0643777		No TF	No TF
714	204097	NPS-D1-000009-B12	10	5					0.744099
715	204076	NPS-D1-000009-C12	10	5					0.728833
716	203954	NPS-D1-000009-D12	10	5					0.888764
717	204066	NPS-D1-000009-E12	10	5					0.828951
718	205345	NPS-D1-000009-F12	10	5					0.469816
719	205319	NPS-D1-000009-G12	10	5					0.916781
720	204686	NPS-D1-000009-H12	10	5					0.984941
721	204756	NPS-D1-000010-A03	10	5					0.956938
722	203796	NPS-D1-000010-B03	10	5					No TF
723	203956	NPS-D1-000010-C03	10	5					0.745672
724	204214	NPS-D1-000010-D03	10	5					No TF
725	203971	NPS-D1-000010-E03	10	5					No TF
726	203992	NPS-D1-000010-F03	10	5					0.326313
727	204054	NPS-D1-000010-G03	10	5					0.326818
728	203877	NPS-D1-000010-H03	10	5					0.47195
729	203975	NPS-D1-000010-A04	10	5					0.481173
730	205370	NPS-D1-000010-B04	10	5					No TF
731	205394	NPS-D1-000010-C04	10	5					No TF
732	205392	NPS-D1-000010-D04	10	5					0.255603		1.02	0.84
733	204057	NPS-D1-000010-E04	10	5					0.278904
734	205897	NPS-D1-000010-F04	10	5					0.403688
735	205688	NPS-D1-000010-G04	10	5					0.281766
736	203928	NPS-D1-000010-H04	10	5					1.23639
737	205863	NPS-D1-000010-A05	10	5					0.227419		0.72	0.76
738	204053	NPS-D1-000010-B05	10	5					0.510661
739	205894	NPS-D1-000010-C05	10	5					0.473375
740	205450	NPS-D1-000010-D05	10	5					0.58197
741	204754	NPS-D1-000010-E05	10	5					0.447752
742	204074	NPS-D1-000010-F05	10	5					1.09701
743	204957	NPS-D1-000010-G05	10	5					0.859494
744	203896	NPS-D1-000010-H05	10	5					No TF
745	205621	NPS-D1-000010-A06	10	5					0.760579
746	204070	NPS-D1-000010-B06	10	5					0.648304
747	203879	NPS-D1-000010-C06	10	5					1.01392
748	205603	NPS-D1-000010-D06	10	5					0.706297
749	203920	NPS-D1-000010-E06	10	5					0.873548
750	204853	NPS-D1-000010-F06	10	5					0.87268
751	203872	NPS-D1-000010-G06	10	5					0.661402
752	203820	NPS-D1-000010-H06	10	5					1.67763		0.56	0.63
753	205622	NPS-D1-000010-A07	10	5					0.91275
754	205539	NPS-D1-000010-B07	10	5					0.578079
755	203811	NPS-D1-000010-C07	10	5					0.595446
756	203848	NPS-D1-000010-D07	10	5					0.493001
757	205497	NPS-D1-000010-E07	10	5					0.527499
758	203889	NPS-D1-000010-F07	10	5					0.484175
759	203868	NPS-D1-000010-G07	10	5					0.608415
760	204725	NPS-D1-000010-H07	10	5					0.52582
761	204689	NPS-D1-000010-A08	10	5					0.566176
762	204677	NPS-D1-000010-B08	10	5					0.932655
763	203797	NPS-D1-000010-C08	10	5					0.626946
764	204763	NPS-D1-000010-D08	10	5					1.3235
765	204125	NPS-D1-000010-E08	10	5					0.66306
766	204684	NPS-D1-000010-F08	10	5					1.62867		1.67	1.76
767	204799	NPS-D1-000010-G08	10	5					1.43257
768	203953	NPS-D1-000010-H08	10	5					0.64693
769	204122	NPS-D1-000010-A09	10	5					0.519451
770	205335	NPS-D1-000010-B09	10	5					0.49526
771	205158	NPS-D1-000010-C09	10	5					0.748196
772	203841	NPS-D1-000010-D09	10	5					1.21816
773	203999	NPS-D1-000010-E09	10	5					0.881837
774	205348	NPS-D1-000010-F09	10	5					0.723946
775	203853	NPS-D1-000010-G09	10	5					0.9269
776	204063	NPS-D1-000010-H09	10	5					0.722864
777	204090	NPS-D1-000010-A10	10	5					0.859813
778	203962	NPS-D1-000010-B10	10	5					1.18015
779	203895	NPS-D1-000010-C10	10	5					2.86929		No TF	1.39
780	203938	NPS-D1-000010-D10	10	5					0.763065
781	203960	NPS-D1-000010-E10	10	5					0.771626
782	203839	NPS-D1-000010-F10	10	5					No TF
783	204858	NPS-D1-000010-G10	10	5					0.991957
784	205235	NPS-D1-000010-H10	10	5					0.893754
785	203799	NPS-D1-000010-A11	10	5					No TF
786	205608	NPS-D1-000010-B11	10	5					1.02231
787	205658	NPS-D1-000010-C11	10	5					1.37398
788	204678	NPS-D1-000010-D11	10	5					1.03828
789	204762	NPS-D1-000010-E11	10	5					1.05647
790	205689	NPS-D1-000010-F11	10	5					0.728836
791	203849	NPS-D1-000010-G11	10	5					0.752879
792	204966	NPS-D1-000010-H11	10	5					0.627046
793	205548	NPS-D1-000010-A12	10	5					0.504606
794	204027	NPS-D1-000010-B12	10	5					0.574686
795	204133	NPS-D1-000010-C12	10	5					0.569487
796	204069	NPS-D1-000010-D12	10	5					0.522691
797	203844	NPS-D1-000010-E12	10	5					1.55115		0.95	0.87
798	203847	NPS-D1-000010-F12	10	5					0.699967
799	203800	NPS-D1-000010-G12	10	5					0.816759
800	203893	NPS-D1-000010-H12	10	5					No TF
801	205449	NPS-D1-000011-A03	10	5					1.1805
802	203807	NPS-D1-000011-B03	10	5					1.36791
803	204981	NPS-D1-000011-C03	10	5					1.24902
804	204061	NPS-D1-000011-D03	10	5					0.914626
805	206059	NPS-D1-000011-E03	10	5					No TF
806	203801	NPS-D1-000011-F03	10	5					1.01197
807	205686	NPS-D1-000011-G03	10	5					1.50918
808	203901	NPS-D1-000011-H03	10	5					0.820818
809	204001	NPS-D1-000011-A04	10	5					1.18024
810	205619	NPS-D1-000011-B04	10	5					1.09939
811	204051	NPS-D1-000011-C04	10	5					0.753529
812	203979	NPS-D1-000011-D04	10	5					0.734539
813	204011	NPS-D1-000011-E04	10	5					No TF
814	203880	NPS-D1-000011-F04	10	5					1.90123
815	204685	NPS-D1-000011-G04	10	5					0.721261
816	204056	NPS-D1-000011-H04	10	5					1.53419
817	205237	NPS-D1-000011-A05	10	5					0.640649
818	206046	NPS-D1-000011-B05	10	5					0.873449
819	203802	NPS-D1-000011-C05	10	5					1.32054
820	205986	NPS-D1-000011-D05	10	5					0.843166
821	204028	NPS-D1-000011-E05	10	5					0.738835
822	203912	NPS-D1-000011-F05	10	5					0.69993
823	205910	NPS-D1-000011-G05	10	5					1.09757
824	204083	NPS-D1-000011-H05	10	5					0.823746
825	204739	NPS-D1-000011-A06	10	5					0.899805
826	203948	NPS-D1-000011-B06	10	5					0.858
827	206064	NPS-D1-000011-C06	10	5					0.72402
828	203803	NPS-D1-000011-D06	10	5					0.75045
829	203806	NPS-D1-000011-E06	10	5					0.209042		No TF	0.31
830	203810	NPS-D1-000011-F06	10	5					0.871481
831	203809	NPS-D1-000011-G06	10	5					0.906746
832	204121	NPS-D1-000011-H06	10	5					0.899517
833	204058	NPS-D1-000011-A07	10	5					0.586917
834	203823	NPS-D1-000011-B07	10	5					1.02535
835	204132	NPS-D1-000011-C07	10	5					1.8025
836	203851	NPS-D1-000011-D07	10	5					1.25514
837	203804	NPS-D1-000011-E07	10	5					1.76033
838	205331	NPS-D1-000011-F07	10	5					0.730337
839	205841	NPS-D1-000011-G07	10	5					0.691211
840	203864	NPS-D1-000011-H07	10	5					0.690649
841	206060	NPS-D1-000011-A08	10	5					0.611847
842	203825	NPS-D1-000011-B08	10	5					3.85442		0.59	0.7
843	203812	NPS-D1-000011-C08	10	5					0.936149
844	204757	NPS-D1-000011-D08	10	5					0.767042
845	203815	NPS-D1-000011-E08	10	5					0.445453
846	203955	NPS-D1-000011-F08	10	5					0.845548
847	205687	NPS-D1-000011-G08	10	5					0.846817
848	204073	NPS-D1-000011-H08	10	5					0.758287
849	205512	NPS-D1-000011-A09	10	5					0.855976
850	203845	NPS-D1-000011-B09	10	5					1.08116
851	204151	NPS-D1-000011-C09	10	5					0.573298
852	204084	NPS-D1-000011-D09	10	5					0.704247
853	205613	NPS-D1-000011-E09	10	5					0.915092
854	205369	NPS-D1-000011-F09	10	5					0.799902
855	205320	NPS-D1-000011-G09	10	5					1.69213
856	205323	NPS-D1-000011-H09	10	5					0.53854
857	203970	NPS-D1-000011-A10	10	5					No TF
858	204059	NPS-D1-000011-B10	10	5					No TF
859	205218	NPS-D1-000011-C10	10	5					0.648972
860	205200	NPS-D1-000011-D10	10	5					0.839264
861	204676	NPS-D1-000011-E10	10	5					2.77536		2.07	1.89
862	203813	NPS-D1-000011-F10	10	5					0.691657
863	203821	NPS-D1-000011-G10	10	5					No TF
864	205692	NPS-D1-000011-H10	10	5					0.736969
865	203827	NPS-D1-000011-A11	10	5					0.569912
866	204683	NPS-D1-000011-B11	10	5					0.38206
867	203961	NPS-D1-000011-C11	10	5					0.552471
868	205601	NPS-D1-000011-D11	10	5					0.673899
869	203972	NPS-D1-000011-E11	10	5					No TF
870	203817	NPS-D1-000011-F11	10	5					0.404244
871	204044	NPS-D1-000011-G11	10	5					0.463634
872	205670	NPS-D1-000011-H11	10	5					No TF
873	204055	NPS-D1-000011-A12	10	5					0.437377
874	204839	NPS-D1-000011-B12	10	5					0.640087
875	203876	NPS-D1-000011-C12	10	5					0.581012
876	203899	NPS-D1-000011-D12	10	5					0.442427
877	203856	NPS-D1-000011-E12	10	5					0.422572
878	205419	NPS-D1-000011-F12	10	5					0.606824
879	203993	NPS-D1-000011-G12	10	5					0.629229
880	204032	NPS-D1-000011-H12	10	5					0.566968
881	204869	NPS-D1-000012-A03	10	5					1
882	205645	NPS-D1-000012-B03	10	5					0.66
883	203819	NPS-D1-000012-C03	10	5					0.55
884	203858	NPS-D1-000012-D03	10	5					1.08		0.54	1.17
885	203968	NPS-D1-000012-E03	10	5					0.88
886	205609	NPS-D1-000012-F03	10	5					0.94
887	204737	NPS-D1-000012-G03	10	5					0.61
888	205520	NPS-D1-000012-H03	10	5					0.58
889	203946	NPS-D1-000012-A04	10	5					No TF
890	203860	NPS-D1-000012-B04	10	5					0.6
891	206049	NPS-D1-000012-C04	10	5					1.1
892	205614	NPS-D1-000012-D04	10	5					0.45
893	204760	NPS-D1-000012-E04	10	5					0.46
894	204038	NPS-D1-000012-F04	10	5					No TF
895	203937	NPS-D1-000012-G04	10	5					0.71
896	205477	NPS-D1-000012-H04	10	5					0.58		0.72	0.76
897	204134	NPS-D1-000012-A05	10	5					0.54
898	203878	NPS-D1-000012-B05	10	5					0.72
899	205004	NPS-D1-000012-C05	10	5					0.76
900	206056	NPS-D1-000012-D05	10	5					No TF		0.72	0.67
901	205330	NPS-D1-000012-E05	10	5					0.81
902	205329	NPS-D1-000012-F05	10	5					0.57
903	205791	NPS-D1-000012-G05	10	5					0.66
904	204952	NPS-D1-000012-H05	10	5					0.65
905	203884	NPS-D1-000012-A06	10	5					0.94		1.38	0.89
906	204212	NPS-D1-000012-B06	10	5					1.01
907	203974	NPS-D1-000012-C06	10	5					0.83
908	205327	NPS-D1-000012-D06	10	5					0.68
909	204119	NPS-D1-000012-E06	10	5					0.69
910	205365	NPS-D1-000012-F06	10	5					0.81609
911	205363	NPS-D1-000012-G06	10	5					No TF	1.35324
912	203898	NPS-D1-000012-H06	10	5					No TF	No TF
913	205581	NPS-D1-000012-A07	10	5					No TF	0.955328
914	203894	NPS-D1-000012-B07	10	5					No TF	No TF
915	203964	NPS-D1-000012-C07	10	5					No TF	1.12986
916	204085	NPS-D1-000012-D07	10	5					No TF	No TF
917	204081	NPS-D1-000012-E07	10	5					No TF	1.06269
918	205305	NPS-D1-000012-F07	10	5					No TF	0.442974	0.76	0.75
919	204131	NPS-D1-000012-G07	10	5					0.554818
920	204050	NPS-D1-000012-H07	10	5					0.917329
921	205495	NPS-D1-000012-A08	10	5					0.850768
922	205537	NPS-D1-000012-B08	10	5					0.617997
923	180833	NPS-D1-000012-C08	14.69	5					0.687281
924	160384	NPS-D1-000012-D08	35.18	5					0.66711
925	180865	NPS-D1-000012-E08	13.23	5					0.701171
926	180830	NPS-D1-000012-F08	14.17	5					1.11733
927	167342	NPS-D1-000012-G08	22.78	5					0.512472
928	167340	NPS-D1-000012-H08	12.49	5					0.625913
929	180781	NPS-D1-000012-A09	26.17	5					0.998139
930	180788	NPS-D1-000012-B09	3.76	5					0.705638
931	180768	NPS-D1-000012-C09	5.48	5					0.915488
932	167444	NPS-D1-000012-D09	11.56	5					0.72852
933	167365	NPS-D1-000012-E09	15.16	5					No TF
934	180775	NPS-D1-000012-F09	14.47	5					0.637703
935	180798	NPS-D1-000012-G09	15.7	5					0.500671
936	167373	NPS-D1-000012-H09	9.65	5					0.58682
937	167363	NPS-D1-000012-A10	13.07	5					No TF
938	180842	NPS-D1-000012-B10	3.98	5					0.657934
939	180823	NPS-D1-000012-C10	11.98	5					0.646383
940	167339	NPS-D1-000012-D10	17	5					0.483407
941	167333	NPS-D1-000012-E10	17.63	5					1.51099		1.15	1.91
942	167366	NPS-D1-000012-F10	12.09	5					0.538816
943	180769	NPS-D1-000012-G10	3.46	5					0.715946
944	180848	NPS-D1-000012-H10	22.57	5					0.631668
945	167367	NPS-D1-000012-A11	11.5	5					0.324124
946	180826	NPS-D1-000012-B11	16.77	5					0.242046
947	180866	NPS-D1-000012-C11	14.72	5					0.517959
948	180831	NPS-D1-000012-D11	12.01	5					0.617844
949	167370	NPS-D1-000012-E11	12.95	5					1.08658
950	167371	NPS-D1-000012-F11	13.07	5					0.608818
951	167349	NPS-D1-000012-G11	15.32	5					0.505992
952	180773	NPS-D1-000012-H11	7.27	5					0.523861
953	167368	NPS-D1-000012-A12	10.36	5					1.20113
954	167358	NPS-D1-000012-B12	13.4	5					0.600324
955	167445	NPS-D1-000012-C12	9.31	5					0.413925
956	167364	NPS-D1-000012-D12	14.38	5					0.583624
957	160440	NPS-D1-000012-E12	20.14	5					0.394651
958	180816	NPS-D1-000012-F12	16.54	5					0.620424
959	167360	NPS-D1-000012-G12	13.98	5					0.503478
960	167353	NPS-D1-000012-H12	20.19	5					0.574141
961	167337	NPS-D1-000013-A03	14.62	5					0.458951
962	180794	NPS-D1-000013-B03	29.66	5					0.580319
963	180799	NPS-D1-000013-C03	15.22	5					1.37689
964	180806	NPS-D1-000013-D03	29.96	5					No TF
965	167357	NPS-D1-000013-E03	14.98	5					No TF
966	180796	NPS-D1-000013-F03	20.21	5					0.479799
967	167347	NPS-D1-000013-G03	15.13	5					0.577971
968	180793	NPS-D1-000013-H03	4.87	5					0.804774
969	180835	NPS-D1-000013-A04	20.93	5					0.622305
970	180861	NPS-D1-000013-B04	10.48	5					0.559032
971	180857	NPS-D1-000013-C04	6.17	5					0.988605
972	167359	NPS-D1-000013-D04	12.88	5					1.12691
973	180844	NPS-D1-000013-E04	12.1	5					0.915488
974	180770	NPS-D1-000013-F04	4.16	5					0.847372
975	167334	NPS-D1-000013-G04	19.19	5					0.48308
976	180845	NPS-D1-000013-H04	9.3	5					0.841317
977	180822	NPS-D1-000013-A05	12.48	5					1.01815
978	167356	NPS-D1-000013-B05	14.3	5					0.718761
979	126663	NPS-D1-000013-C05	20.14	5					0.790469
980	180853	NPS-D1-000013-D05	23.78	5					0.920607
981	167325	NPS-D1-000013-E05	28.22	5					1.81829		1.52	1.64
982	160398	NPS-D1-000013-F05	21.16	5					1.94806		4.89	3.29
983	167354	NPS-D1-000013-G05	14.44	5					1.01076
984	180795	NPS-D1-000013-H05	23.48	5					No TF		0.67	0.64
985	180766	NPS-D1-000013-A06	14.09	5					No TF
986	167351	NPS-D1-000013-B06	18.72	5					1.2609
987	180838	NPS-D1-000013-C06	11.97	5					0.895843
988	180820	NPS-D1-000013-D06	13.33	5					0.603017
989	167372	NPS-D1-000013-E06	13.07	5					1.10128
990	160331	NPS-D1-000013-F06	27.75	5					0.996241
991	167369	NPS-D1-000013-G06	14.34	5					0.73687
992	180828	NPS-D1-000013-H06	17.59	5					0.784407
993	160413	NPS-D1-000013-A07	14.69	5					0.769823
994	167328	NPS-D1-000013-B07	31.6	5					1.47304
995	180787	NPS-D1-000013-C07	14.98	5					1.12444
996	126693	NPS-D1-000013-D07	28.07	5					0.927054
997	160424	NPS-D1-000013-E07	22.69	5					0.852258
998	180827	NPS-D1-000013-F07	15.37	5					1.17448
999	167345	NPS-D1-000013-G07	18.26	5					0.812919
1000	180779	NPS-D1-000013-H07	19.63	5					0.653667
1001	167350	NPS-D1-000013-A08	13.87	5					0.52154
1002	180804	NPS-D1-000013-B08	3.65	5					0.788313
1003	160407	NPS-D1-000013-C08	17.47	5					0.772207
1004	167338	NPS-D1-000013-D08	14.27	5					0.361615
1005	167344	NPS-D1-000013-E08	13.48	5					0.658495
1006	167348	NPS-D1-000013-F08	12.24	5					0.589209
1007	180778	NPS-D1-000013-G08	30.03	5					No TF
1008	180777	NPS-D1-000013-H08	18.16	5					0.537954
1009	167355	NPS-D1-000013-A09	17.4	5					0.785084
1010	167336	NPS-D1-000013-B09	15.84	5					0.445525
1011	180862	NPS-D1-000013-C09	12	5					1.06716
1012	167341	NPS-D1-000013-D09	13.04	5					0.501194
1013	167362	NPS-D1-000013-E09	14.64	5					0.675652
1014	180843	NPS-D1-000013-F09	4.53	5					0.544978
1015	180836	NPS-D1-000013-G09	17.45	5					0.441405
1016	180863	NPS-D1-000013-H09	31.36	5					No TF
1017	180762	NPS-D1-000013-A10	15.96	5					0.607988
1018	160376	NPS-D1-000013-B10	32.41	5					0.365911
1019	167352	NPS-D1-000013-C10	18.72	5					0.446032

## Sheet: Sheet2
Compound ID	Library Position	Compound Concentration(mM)	Fold changes in TTP promoter activity
			1st screening	2nd sreening	3rd screening
416198	NPS-D1-000001-G05	4.71	5.28549	2.52	2.4
423147	NPS-D1-000001-E10	4.62	5.1228	2.09	3.27
260320	NPS-D1-000007-E12	5.1	4.36102	0.68	0.5
91944	NPS-D1-000007-D12	4.87	4.25595	0.76	0.65
95924	NPS-D1-000007-E11	5.06	4.05854	0.95	0.76
203825	NPS-D1-000011-B08	10	3.85442	0.59	0.7
209573	NPS-D1-000007-B10	5.2	3.29472	2.43	2.61
226616	NPS-D1-000002-G03	5.1	3.10239	0.79	0.93
226608	NPS-D1-000007-H10	5.4	3.07943	0.93	0.84
220781	NPS-D1-000007-A10	5.4	2.99344	2.04	2.38
220780	NPS-D1-000007-G11	5	2.96208	0.62	0.71
203895	NPS-D1-000010-C10	10	2.86929	0.8	1.39
220873	NPS-D1-000007-A12	5	2.78873	0.61	0.51
204676	NPS-D1-000011-E10	10	2.77536	2.07	1.89
226610	NPS-D1-000007-F11	4.7	2.70184	0.92	0.78
220706	NPS-D1-000007-C12	5.2	2.69637	0.57	0.72
220778	NPS-D1-000007-D11	5.1	2.64507	1.22	0.89
226624	NPS-D1-000007-A11	5.4	2.59979	1.52	1.14
92095	NPS-D1-000007-F10	4.89	2.55659	0.94	1.05
95720	NPS-D1-000007-C10	5.14	2.50445	0.84	1.09
416585	NPS-D1-000006-F04	5.13	2.49479	2.62	1.73
416924	NPS-D1-000008-F11	5.42	2.38792	1.13	0.96
220737	NPS-D1-000003-D12	4.7	2.34854	0.72	0.82
220828	NPS-D1-000007-B11	4.8	2.3323	1.31	1.47
92444	NPS-D1-000005-A06	5.08	2.31595	2.69	3.15
220874	NPS-D1-000007-G12	4.7	2.1174	0.56	0.99
226613	NPS-D1-000007-C11	4.7	2.08967	1.28	1.09
416455	NPS-D1-000007-D10	4.57	2.08965	1.78	1.43
416512	NPS-D1-000008-D04	4.83	2.07272	0.81	1.04
416315	NPS-D1-000006-B07	4.95	2.07071	1.35	1.94
95820	NPS-D1-000002-C09	5	2.04356	1.15	0.89
160398	NPS-D1-000013-F05	21.16	1.94806
203867	NPS-D1-000009-E09	10	1.91105
203880	NPS-D1-000011-F04	10	1.90123
95618	NPS-D1-000004-E06	4.96	1.85694
416421	NPS-D1-000001-H07	5.07	1.84263
167325	NPS-D1-000013-E05	28.22	1.81829
204132	NPS-D1-000011-C07	10	1.8025
204215	NPS-D1-000009-D10	10	1.80125
424996	NPS-D1-000007-B08	5.37	1.7864
91425	NPS-D1-000007-E10	4.99	1.77194
203804	NPS-D1-000011-E07	10	1.76033
91524	NPS-D1-000003-B04	5.07	1.74267
425449	NPS-D1-000006-E12	5.25	1.73985
416488	NPS-D1-000006-G11	5.18	1.71089
416723	NPS-D1-000001-F11	4.78	1.71085
416989	NPS-D1-000008-D12	4.75	1.70242
205320	NPS-D1-000011-G09	10	1.69213
203820	NPS-D1-000010-H06	10	1.67763
226640	NPS-D1-000007-F12	4.7	1.67416
416575	NPS-D1-000008-C04	5.32	1.67015
91440	NPS-D1-000002-A03	4.9	1.66831
95731	NPS-D1-000003-B07	4.99	1.63942
220765	NPS-D1-000002-H09	5.1	1.63528
204684	NPS-D1-000010-F08	10	1.62867
416496	NPS-D1-000008-A03	5.23	1.60113
416543	NPS-D1-000008-B04	5.1	1.58689
220721	NPS-D1-000002-E09	4.9	1.56225
220754	NPS-D1-000002-B07	5.2	1.55801
203844	NPS-D1-000010-E12	10	1.55115
260328	NPS-D1-000002-C10	5.3	1.54969
91928	NPS-D1-000004-D07	4.92	1.54584
226609	NPS-D1-000003-C08	4.8	1.54318
220832	NPS-D1-000002-C07	5.2	1.54226
220818	NPS-D1-000007-B12	4.9	1.53941
91428	NPS-D1-000007-H12	5.04	1.53508
204056	NPS-D1-000011-H04	10	1.53419
220822	NPS-D1-000002-A08	5.3	1.53077
206517	NPS-D1-000001-C05	5.1	1.52954
220810	NPS-D1-000002-F09	5.3	1.5291
220786	NPS-D1-000002-G10	4.6	1.52217
167333	NPS-D1-000012-E10	17.63	1.51099
205686	NPS-D1-000011-G03	10	1.50918
416518	NPS-D1-000008-H05	4.94	1.48467
423152	NPS-D1-000009-D08	5.27	1.48075
416671	NPS-D1-000008-F06	5.1	1.47837
167328	NPS-D1-000013-B07	31.6	1.47304
416394	NPS-D1-000001-G06	4.87	1.47015
423423	NPS-D1-000003-C07	5.11	1.46485
219327	NPS-D1-000003-A07	5.1	1.45082
204799	NPS-D1-000010-G08	10	1.43257
204794	NPS-D1-000009-H09	10	1.41899
220880	NPS-D1-000002-D09	5	1.41308
220801	NPS-D1-000003-D11	4.2	1.40395
416494	NPS-D1-000006-H11	4.89	1.40349
219386	NPS-D1-000004-B08	5.2	1.40095
220756	NPS-D1-000005-B12	5.2	1.39898
416763	NPS-D1-000001-H12	5.31	1.39854
417029	NPS-D1-000008-E12	5.3	1.3974
226607	NPS-D1-000001-B03	4.9	1.39168
92326	NPS-D1-000001-C03	5.14	1.39044
95838	NPS-D1-000002-D10	5.1	1.38552
220734	NPS-D1-000002-B10	5.2	1.38326
180799	NPS-D1-000013-C03	15.22	1.37689
416519	NPS-D1-000008-H03	4.84	1.37564
205658	NPS-D1-000010-C11	10	1.37398
416656	NPS-D1-000008-A08	4.94	1.36999
203807	NPS-D1-000011-B03	10	1.36791
92303	NPS-D1-000005-C12	4.99	1.36278
423424	NPS-D1-000003-D07	4.92	1.36041
416326	NPS-D1-000006-G08	4.8	1.35861
226639	NPS-D1-000007-E05	4.9	1.35789
416581	NPS-D1-000008-G05	5.21	1.35723
91875	NPS-D1-000003-A09	5.06	1.35428
205363	NPS-D1-000012-G06	10	1.35324
416300	NPS-D1-000006-F07	5.2	1.3447
260308	NPS-D1-000004-F06	5.3	1.34159
416466	NPS-D1-000001-B08	4.88	1.33995
226611	NPS-D1-000004-D10	4.9	1.33108
416582	NPS-D1-000008-F03	5.32	1.32913
204763	NPS-D1-000010-D08	10	1.3235
220902	NPS-D1-000004-H10	4.7	1.32309
220806	NPS-D1-000002-D12	5.1	1.32303
203802	NPS-D1-000011-C05	10	1.32054
91995	NPS-D1-000002-A11	5.05	1.31964
220733	NPS-D1-000004-F11	5.2	1.31386
220817	NPS-D1-000001-F04	4.8	1.30847
416487	NPS-D1-000008-G03	5.06	1.29689
220865	NPS-D1-000003-G09	5.4	1.29599
416417	NPS-D1-000006-C10	4.96	1.29408
220903	NPS-D1-000003-G05	5.4	1.29278
416633	NPS-D1-000001-E06	4.94	1.28274
95930	NPS-D1-000004-F10	4.99	1.28077
220712	NPS-D1-000002-B08	5.1	1.27807
95923	NPS-D1-000001-F03	5.1	1.26787
92366	NPS-D1-000004-D12	5	1.26603
167351	NPS-D1-000013-B06	18.72	1.2609
203851	NPS-D1-000011-D07	10	1.25514
91857	NPS-D1-000005-H12	4.97	1.25468
219359	NPS-D1-000002-H10	5.3	1.25187
204981	NPS-D1-000011-C03	10	1.24902
425318	NPS-D1-000002-A10	4.96	1.2489
220891	NPS-D1-000002-D07	5.3	1.24812
209585	NPS-D1-000002-H08	5.26	1.24209
203928	NPS-D1-000010-H04	10	1.23639
95664	NPS-D1-000001-B04	5.04	1.22852
416798	NPS-D1-000008-A10	5.21	1.22671
423154	NPS-D1-000009-B09	4.94	1.22329
416643	NPS-D1-000008-D08	4.98	1.22111
203841	NPS-D1-000010-D09	10	1.21816
91826	NPS-D1-000002-E10	5.06	1.21794
220878	NPS-D1-000005-E05	4.9	1.21137
416498	NPS-D1-000001-C08	4.92	1.21088
91881	NPS-D1-000004-G04	5.1	1.20655
416718	NPS-D1-000008-C06	4.92	1.20293
167368	NPS-D1-000012-A12	10.36	1.20113
220854	NPS-D1-000003-G08	5.2	1.18902
416548	NPS-D1-000001-D10	4.95	1.18814
417121	NPS-D1-000007-B07	4.85	1.18555
416580	NPS-D1-000008-B05	5.28	1.18448
417028	NPS-D1-000008-C12	5.15	1.18101
205449	NPS-D1-000011-A03	10	1.1805
204001	NPS-D1-000011-A04	10	1.18024
203962	NPS-D1-000010-B10	10	1.18015
416964	NPS-D1-000008-G11	4.82	1.17673
180827	NPS-D1-000013-F07	15.37	1.17448
416573	NPS-D1-000008-F05	5.2	1.17017
416112	NPS-D1-000001-A08	5.06	1.16357
416678	NPS-D1-000008-E06	4.87	1.15951
416636	NPS-D1-000008-F08	5	1.15913
96048	NPS-D1-000001-B05	4.98	1.15621
416236	NPS-D1-000004-G11	5.21	1.15535
220821	NPS-D1-000003-H12	5.1	1.15529
220792	NPS-D1-000002-A09	5	1.15513
416419	NPS-D1-000001-B07	5.21	1.15481
95925	NPS-D1-000001-A04	5.06	1.15432
206527	NPS-D1-000004-D11	5.4	1.1479
417487	NPS-D1-000009-A05	4.82	1.14601
416324	NPS-D1-000006-G07	4.67	1.14555
423155	NPS-D1-000001-F10	4.89	1.14509
416697	NPS-D1-000008-A07	4.81	1.14346
416599	NPS-D1-000008-E07	4.9	1.14345
220723	NPS-D1-000002-F05	4.9	1.14249
416222	NPS-D1-000001-H05	5.03	1.14045
219356	NPS-D1-000002-F12	5.2	1.1402
416325	NPS-D1-000006-C08	5.12	1.13989
219321	NPS-D1-000002-G09	5.7	1.13716
416642	NPS-D1-000008-B08	5.07	1.1356
206526	NPS-D1-000003-B08	5.4	1.13386
416523	NPS-D1-000001-C09	5.09	1.13163
203964	NPS-D1-000012-C07	10	1.12986
167359	NPS-D1-000013-D04	12.88	1.12691
180787	NPS-D1-000013-C07	14.98	1.12444
416719	NPS-D1-000008-G06	4.98	1.12183
209590	NPS-D1-000003-E06	5.2	1.1213
416574	NPS-D1-000008-E03	4.98	1.12105
416562	NPS-D1-000001-G08	4.81	1.1206
416716	NPS-D1-000001-A12	4.78	1.1175
180830	NPS-D1-000012-F08	14.17	1.11733
220730	NPS-D1-000003-A03	4.8	1.11608
417626	NPS-D1-000009-F05	4.85	1.11587
416504	NPS-D1-000008-B03	5.16	1.11471
220724	NPS-D1-000003-H04	5.3	1.11041
206520	NPS-D1-000001-G03	5.4	1.10805
220823	NPS-D1-000002-H07	5.4	1.10797
416380	NPS-D1-000001-D07	5.17	1.10573
416530	NPS-D1-000001-E08	4.79	1.10376
416545	NPS-D1-000006-D04	4.89	1.10174
220892	NPS-D1-000002-E08	4.8	1.10167
167372	NPS-D1-000013-E06	13.07	1.10128
206049	NPS-D1-000012-C04	10	1.1
205619	NPS-D1-000011-B04	10	1.09939
205910	NPS-D1-000011-G05	10	1.09757
204074	NPS-D1-000010-F05	10	1.09701
260324	NPS-D1-000005-F12	4.8	1.0948
416536	NPS-D1-000008-F04	4.93	1.09458
220858	NPS-D1-000004-C04	5	1.09183
91968	NPS-D1-000003-E10	4.94	1.09011
416623	NPS-D1-000008-F07	5.45	1.08912
91515	NPS-D1-000003-G12	4.91	1.08845
167370	NPS-D1-000012-E11	12.95	1.08658
203845	NPS-D1-000011-B09	10	1.08116
203858	NPS-D1-000012-D03	10	1.08
206519	NPS-D1-000002-G12	5	1.07833
416477	NPS-D1-000006-F11	5.34	1.07462
260800	NPS-D1-000002-E07	4.9	1.07389
219364	NPS-D1-000002-D08	5	1.07301
92131	NPS-D1-000004-F03	5.08	1.0708
416672	NPS-D1-000008-H06	5.18	1.07025
180862	NPS-D1-000013-C09	12	1.06716
417031	NPS-D1-000009-B03	4.81	1.06565
220713	NPS-D1-000005-A12	5	1.06494
91437	NPS-D1-000002-A06	4.97	1.06487
416734	NPS-D1-000008-D06	5.1	1.06419
220844	NPS-D1-000004-B06	4.9	1.06381
204081	NPS-D1-000012-E07	10	1.06269
226623	NPS-D1-000001-D04	5.4	1.06148
416287	NPS-D1-000006-A09	4.94	1.05803
416459	NPS-D1-000006-A11	5.19	1.05669
204762	NPS-D1-000010-E11	10	1.05647
206500	NPS-D1-000005-E12	4.6	1.05341
260805	NPS-D1-000007-D04	5	1.05069
91494	NPS-D1-000003-F12	5.14	1.05036
416521	NPS-D1-000008-A05	5.02	1.04651
220731	NPS-D1-000002-D04	5.1	1.04521
425144	NPS-D1-000001-E09	4.76	1.04453
220791	NPS-D1-000003-F05	5	1.04334
416683	NPS-D1-000001-E11	5.17	1.04185
204678	NPS-D1-000010-D11	10	1.03828
416702	NPS-D1-000008-B06	4.98	1.03681
95687	NPS-D1-000003-F09	5.02	1.03397
220809	NPS-D1-000002-G07	5	1.03053
96010	NPS-D1-000001-A03	5	1.02756
203823	NPS-D1-000011-B07	10	1.02535
416495	NPS-D1-000006-B12	5.1	1.02532
219329	NPS-D1-000004-D05	5.1	1.02391
220763	NPS-D1-000004-A10	4.8	1.02246
205608	NPS-D1-000010-B11	10	1.02231
96113	NPS-D1-000005-D12	4.71	1.01969
180822	NPS-D1-000013-A05	12.48	1.01815
91827	NPS-D1-000003-D04	5.15	1.01515
425326	NPS-D1-000004-D09	4.6	1.01434
203879	NPS-D1-000010-C06	10	1.01392
417695	NPS-D1-000009-C06	4.98	1.01372
206515	NPS-D1-000001-C04	4.9	1.01319
260791	NPS-D1-000005-B05	5	1.01232
203801	NPS-D1-000011-F03	10	1.01197
416153	NPS-D1-000006-C03	4.76	1.01096
167354	NPS-D1-000013-G05	14.44	1.01076
204212	NPS-D1-000012-B06	10	1.01
423164	NPS-D1-000001-C11	4.97	1.00937
423172	NPS-D1-000001-D11	5.22	1.00895
416152	NPS-D1-000006-G03	4.75	1.00649
416546	NPS-D1-000001-F08	5.45	1.00594
209574	NPS-D1-000001-H04	5	1.00527
416571	NPS-D1-000001-G09	4.68	1.00426
416531	NPS-D1-000001-D09	5.26	1.00193
91467	NPS-D1-000003-H08	5.1	1.00188
204869	NPS-D1-000012-A03	10	1
226625	NPS-D1-000003-F06	5	0.999065
416441	NPS-D1-000008-C03	4.61	0.998283
180781	NPS-D1-000012-A09	26.17	0.998139
160331	NPS-D1-000013-F06	27.75	0.996241
416302	NPS-D1-000006-F08	4.89	0.995694
95954	NPS-D1-000004-C08	5.04	0.993658
425347	NPS-D1-000006-F12	4.78	0.993502
204858	NPS-D1-000010-G10	10	0.991957
219366	NPS-D1-000005-B03	5.5	0.989724
260338	NPS-D1-000002-E12	4.8	0.989304
180857	NPS-D1-000013-C04	6.17	0.988605
416108	NPS-D1-000001-A07	4.7	0.988224
416579	NPS-D1-000001-H09	4.73	0.987762			`
226606	NPS-D1-000003-F11	5.1	0.987754
204686	NPS-D1-000009-H12	10	0.984941
206546	NPS-D1-000001-H03	5.4	0.98251
416122	NPS-D1-000001-F09	5.03	0.982504
206522	NPS-D1-000005-G12	5.3	0.981013
219353	NPS-D1-000001-E05	4.9	0.981003
416295	NPS-D1-000006-B09	4.95	0.979415
425296	NPS-D1-000009-G07	4.66	0.978949
416301	NPS-D1-000006-B08	4.93	0.978791
416524	NPS-D1-000001-C10	5.1	0.977966
209561	NPS-D1-000004-B03	4.9	0.976875
260783	NPS-D1-000004-G10	5.1	0.976052
416525	NPS-D1-000008-C05	5.28	0.97511
91939	NPS-D1-000004-H05	5.1	0.974613
416527	NPS-D1-000008-A04	4.63	0.9744
417807	NPS-D1-000009-F06	4.54	0.974159
416609	NPS-D1-000001-C06	4.85	0.972375
219331	NPS-D1-000001-D03	5.4	0.971897
416440	NPS-D1-000006-G10	5.22	0.970781
220898	NPS-D1-000002-F04	4.9	0.970293
416431	NPS-D1-000006-A12	4.85	0.96926
226620	NPS-D1-000002-D05	4.6	0.967834
206521	NPS-D1-000002-H12	5.1	0.965517
416768	NPS-D1-000006-D03	4.77	0.965455
92270	NPS-D1-000004-A12	5.14	0.959148
203874	NPS-D1-000009-C09	10	0.95889
416323	NPS-D1-000006-C07	5.19	0.958832
416501	NPS-D1-000006-F06	4.8	0.957719
204756	NPS-D1-000010-A03	10	0.956938
205581	NPS-D1-000012-A07	10	0.955328
416277	NPS-D1-000006-A08	5.43	0.953606
91819	NPS-D1-000002-F06	4.94	0.952783
423167	NPS-D1-000009-C08	5.22	0.951178
220776	NPS-D1-000004-B07	5	0.950697
417627	NPS-D1-000009-G05	5.18	0.948311
209588	NPS-D1-000003-C04	4.5	0.946772
416364	NPS-D1-000001-C07	5.14	0.946438
416800	NPS-D1-000006-F03	5.03	0.945443
416401	NPS-D1-000006-B10	4.83	0.945172
416377	NPS-D1-000006-A10	4.83	0.944173
220722	NPS-D1-000002-A05	5.1	0.942962
91828	NPS-D1-000004-A03	5.04	0.942607
91874	NPS-D1-000004-H07	5.02	0.942127
220814	NPS-D1-000003-H03	5.1	0.941975
203884	NPS-D1-000012-A06	10	0.94
205609	NPS-D1-000012-F03	10	0.94
260340	NPS-D1-000002-A07	5.2	0.939607
417736	NPS-D1-000009-D06	4.74	0.938902
416303	NPS-D1-000006-C09	4.96	0.937761
220837	NPS-D1-000003-C11	4.8	0.93706
203812	NPS-D1-000011-C08	10	0.936149
219367	NPS-D1-000002-B06	5.3	0.934589
219378	NPS-D1-000003-C12	5.5	0.933829
204677	NPS-D1-000010-B08	10	0.932655
96054	NPS-D1-000007-H04	4.99	0.932593
416516	NPS-D1-000001-B10	4.81	0.932093
423171	NPS-D1-000001-H10	4.86	0.929881
260339	NPS-D1-000004-A04	5.2	0.929473
91830	NPS-D1-000004-C05	5.05	0.929107
425322	NPS-D1-000006-H12	4.72	0.928714
416529	NPS-D1-000006-B04	4.97	0.928408
126693	NPS-D1-000013-D07	28.07	0.927054
203853	NPS-D1-000010-G09	10	0.9269
416183	NPS-D1-000006-G04	5.04	0.926795
220840	NPS-D1-000003-F10	4.7	0.926264
180853	NPS-D1-000013-D05	23.78	0.920607
416533	NPS-D1-000008-D05	5.41	0.919841
206511	NPS-D1-000001-E03	5.2	0.918292
204050	NPS-D1-000012-H07	10	0.917329
220710	NPS-D1-000004-F04	4.8	0.916988
205319	NPS-D1-000009-G12	10	0.916781
423188	NPS-D1-000009-H06	4.85	0.916757
180768	NPS-D1-000012-C09	5.48	0.915488
180844	NPS-D1-000013-E04	12.1	0.915488
205613	NPS-D1-000011-E09	10	0.915092
204061	NPS-D1-000011-D03	10	0.914626
416552	NPS-D1-000008-G04	4.6	0.914297
416937	NPS-D1-000008-A12	4.97	0.913833
206536	NPS-D1-000001-D05	4.5	0.913191
205622	NPS-D1-000010-A07	10	0.91275
91817	NPS-D1-000005-G05	4.97	0.910562
416133	NPS-D1-000001-G11	5.09	0.909749
416657	NPS-D1-000001-F06	5.01	0.90948
416146	NPS-D1-000006-A03	4.88	0.909404
416319	NPS-D1-000006-D09	4.94	0.909123
416537	NPS-D1-000006-C04	4.74	0.907452
416288	NPS-D1-000006-G09	4.8	0.906833
425351	NPS-D1-000006-G12	5.36	0.906771
203809	NPS-D1-000011-G06	10	0.906746
206506	NPS-D1-000004-C06	5.2	0.906176
416766	NPS-D1-000008-H09	4.77	0.905035
226642	NPS-D1-000003-H11	5.3	0.901255
205029	NPS-D1-000009-D11	10	0.900903
417490	NPS-D1-000009-B05	5.18	0.900618
204739	NPS-D1-000011-A06	10	0.899805
219395	NPS-D1-000005-A05	5.2	0.899542
204121	NPS-D1-000011-H06	10	0.899517
226614	NPS-D1-000005-D03	5.1	0.897766
417386	NPS-D1-000009-G04	5.09	0.896798
220805	NPS-D1-000004-D06	5	0.896528
180838	NPS-D1-000013-C06	11.97	0.895843
226627	NPS-D1-000005-A08	4.7	0.89511
205235	NPS-D1-000010-H10	10	0.893754
226598	NPS-D1-000003-C03	4.9	0.893203
423410	NPS-D1-000003-E07	5.01	0.889328
416794	NPS-D1-000001-F12	5.32	0.889078
203954	NPS-D1-000009-D12	10	0.888764
226617	NPS-D1-000003-G11	5.2	0.888448
416492	NPS-D1-000006-C11	5.1	0.888211
226621	NPS-D1-000005-B06	4.9	0.887151
416717	NPS-D1-000001-C12	5.21	0.886987
220868	NPS-D1-000003-A04	4.9	0.8859
91459	NPS-D1-000002-H11	4.85	0.885568
416528	NPS-D1-000008-E04	5.4	0.885565
416852	NPS-D1-000008-E11	4.96	0.884454
416296	NPS-D1-000006-H09	4.9	0.882726
260777	NPS-D1-000002-C05	5	0.88245
424907	NPS-D1-000001-H08	4.76	0.881932
203999	NPS-D1-000010-E09	10	0.881837
417663	NPS-D1-000009-B06	5.01	0.880641
423148	NPS-D1-000001-A11	4.87	0.880516
220807	NPS-D1-000004-G08	4.8	0.880432
203968	NPS-D1-000012-E03	10	0.88
425046	NPS-D1-000001-A10	4.73	0.879652
416793	NPS-D1-000006-A04	4.96	0.877919
220797	NPS-D1-000002-G05	5.2	0.877468
220775	NPS-D1-000003-G06	5.1	0.876475
203857	NPS-D1-000009-C10	10	0.875832
425352	NPS-D1-000006-D12	4.61	0.875094
417568	NPS-D1-000009-C05	4.65	0.874425
203920	NPS-D1-000010-E06	10	0.873548
206046	NPS-D1-000011-B05	10	0.873449
423368	NPS-D1-000003-F07	5.36	0.872849
204853	NPS-D1-000010-F06	10	0.87268
423159	NPS-D1-000009-B08	4.76	0.872651
416106	NPS-D1-000001-A06	4.95	0.871582
203810	NPS-D1-000011-F06	10	0.871481
416279	NPS-D1-000006-H08	4.78	0.870684
226638	NPS-D1-000004-D08	5.3	0.870668
416180	NPS-D1-000006-H04	4.88	0.870242
416733	NPS-D1-000001-D12	5.04	0.869501
416732	NPS-D1-000001-B12	5.04	0.869063
206535	NPS-D1-000004-D03	4.9	0.868363
220795	NPS-D1-000005-E08	5.2	0.868112
209568	NPS-D1-000004-H09	4.85	0.866122
226635	NPS-D1-000002-F07	5.1	0.864156
95905	NPS-D1-000005-F05	4.9	0.864015
260314	NPS-D1-000007-C03	4.8	0.863329
209562	NPS-D1-000003-B12	5.06	0.863322
416130	NPS-D1-000001-H11	4.81	0.862881
416343	NPS-D1-000006-E09	4.75	0.862854
416812	NPS-D1-000008-E09	5.09	0.862691
423168	NPS-D1-000009-F08	4.74	0.86058
416503	NPS-D1-000006-D11	4.78	0.860242
416578	NPS-D1-000001-A09	5.13	0.860164
220774	NPS-D1-000004-E05	5.1	0.860027
204090	NPS-D1-000010-A10	10	0.859813
204957	NPS-D1-000010-G05	10	0.859494
220830	NPS-D1-000002-B03	5.2	0.859306
91833	NPS-D1-000003-G03	4.97	0.859181
425452	NPS-D1-000006-C12	5.27	0.859135
203948	NPS-D1-000011-B06	10	0.858
95722	NPS-D1-000001-A05	5.08	0.85702
205512	NPS-D1-000011-A09	10	0.855976
416388	NPS-D1-000001-E07	5.36	0.855473
206507	NPS-D1-000003-B11	5.8	0.855396
417678	NPS-D1-000009-A06	5.4	0.854811
416109	NPS-D1-000001-F07	5.05	0.854018
220843	NPS-D1-000002-C08	4.8	0.852373
160424	NPS-D1-000013-E07	22.69	0.852258
416460	NPS-D1-000006-B11	5.27	0.851563
205495	NPS-D1-000012-A08	10	0.850768
260327	NPS-D1-000004-A05	4.9	0.848563
91929	NPS-D1-000004-E11	5.09	0.848216
417619	NPS-D1-000009-D05	5.24	0.847883
180770	NPS-D1-000013-F04	4.16	0.847372
423206	NPS-D1-000009-H07	4.82	0.84687
205687	NPS-D1-000011-G08	10	0.846817
220772	NPS-D1-000003-E12	5.2	0.846676
260329	NPS-D1-000004-D04	4.7	0.846628
220859	NPS-D1-000007-B04	4.8	0.84571
203955	NPS-D1-000011-F08	10	0.845548
220867	NPS-D1-000002-D06	5.1	0.845522
220879	NPS-D1-000002-E06	5.2	0.845442
423149	NPS-D1-000009-A07	5.32	0.844236
209564	NPS-D1-000002-H06	5.4	0.843803
416274	NPS-D1-000006-D10	5.13	0.843526
205986	NPS-D1-000011-D05	10	0.843166
423173	NPS-D1-000009-D07	4.75	0.842293
416219	NPS-D1-000004-C09	4.84	0.841861
180845	NPS-D1-000013-H04	9.3	0.841317
423262	NPS-D1-000003-A08	5.13	0.840881
220897	NPS-D1-000004-E04	5.1	0.839764
205200	NPS-D1-000011-D10	10	0.839264
416420	NPS-D1-000001-G07	5.14	0.838917
220725	NPS-D1-000007-H06	4.7	0.837167
226600	NPS-D1-000005-H08	5	0.837115
424347	NPS-D1-000008-E10	4.85	0.8336
220750	NPS-D1-000003-A12	5.2	0.83309
220815	NPS-D1-000005-D06	5.1	0.830916
206534	NPS-D1-000001-E04	5.3	0.830694
219328	NPS-D1-000003-F04	4.9	0.830692
203974	NPS-D1-000012-C06	10	0.83
204066	NPS-D1-000009-E12	10	0.828951
417278	NPS-D1-000007-D07	5.25	0.828677
95706	NPS-D1-000003-A11	4.9	0.827615
423165	NPS-D1-000009-C07	5.24	0.827376
260786	NPS-D1-000003-E11	4.9	0.827038
206524	NPS-D1-000003-G04	5.5	0.826626
416515	NPS-D1-000001-B09	5.12	0.825549
220848	NPS-D1-000003-A05	5	0.823861
204083	NPS-D1-000011-H05	10	0.823746
416212	NPS-D1-000004-G09	4.74	0.823677
416313	NPS-D1-000006-F05	5.11	0.823315
91822	NPS-D1-000002-G04	4.94	0.82165
416625	NPS-D1-000001-D06	5.25	0.821444
226634	NPS-D1-000004-G07	5.3	0.82099
203901	NPS-D1-000011-H03	10	0.820818
416990	NPS-D1-000008-F12	4.84	0.820058
416542	NPS-D1-000008-A06	4.67	0.819302
203800	NPS-D1-000010-G12	10	0.816759
220901	NPS-D1-000002-D03	5	0.816595
205365	NPS-D1-000012-F06	10	0.81609
209576	NPS-D1-000003-H05	4.51	0.81545
91490	NPS-D1-000002-B11	5.09	0.813281
167345	NPS-D1-000013-G07	18.26	0.812919
416628	NPS-D1-000008-E08	5.02	0.811599
416761	NPS-D1-000006-H03	5.1	0.811575
417387	NPS-D1-000009-H04	5.06	0.810504
205330	NPS-D1-000012-E05	10	0.81
220871	NPS-D1-000003-D05	5.3	0.809538
95745	NPS-D1-000004-C07	4.97	0.809379
416291	NPS-D1-000006-A07	4.83	0.808247
416217	NPS-D1-000006-D06	5.23	0.807966
416283	NPS-D1-000006-H06	5.16	0.807167
180793	NPS-D1-000013-H03	4.87	0.804774
416185	NPS-D1-000006-B05	5.36	0.802239
417301	NPS-D1-000007-C07	4.62	0.801617
423160	NPS-D1-000009-E08	5.3	0.800973
205369	NPS-D1-000011-F09	10	0.799902
417192	NPS-D1-000009-G03	4.82	0.797508
423157	NPS-D1-000009-B07	5.12	0.796908
416658	NPS-D1-000008-C08	5.06	0.792968
226632	NPS-D1-000004-A06	5	0.792858
417625	NPS-D1-000009-E05	4.53	0.791945
423156	NPS-D1-000001-B11	5.03	0.791305
416284	NPS-D1-000006-E07	5.01	0.791121
220850	NPS-D1-000004-H04	5.2	0.790765
126663	NPS-D1-000013-C05	20.14	0.790469
416980	NPS-D1-000008-H11	4.96	0.789975
180804	NPS-D1-000013-B08	3.65	0.788313
416762	NPS-D1-000001-E12	5.11	0.788282
167355	NPS-D1-000013-A09	17.4	0.785084
180828	NPS-D1-000013-H06	17.59	0.784407
91986	NPS-D1-000002-A04	5.04	0.784069
220782	NPS-D1-000005-H05	5.6	0.783996
423163	NPS-D1-000001-G10	5.07	0.783033
220788	NPS-D1-000004-B04	5	0.782622
226633	NPS-D1-000004-G12	5.4	0.782546
204954	NPS-D1-000009-F09	10	0.781439
96035	NPS-D1-000004-F07	5.04	0.779964
220808	NPS-D1-000004-A08	5.2	0.778638
417084	NPS-D1-000009-D03	5.31	0.778601
220888	NPS-D1-000004-C03	5.2	0.775623
425295	NPS-D1-000009-F07	4.74	0.775383
416184	NPS-D1-000006-A05	5.07	0.774511
203854	NPS-D1-000009-B10	10	0.774424
416224	NPS-D1-000006-B06	5.08	0.77402
206525	NPS-D1-000004-C12	5.6	0.773921
220869	NPS-D1-000002-G06	4.9	0.773656
220899	NPS-D1-000005-C07	4.7	0.77352
220825	NPS-D1-000007-C04	4.9	0.773251
416853	NPS-D1-000008-F10	4.99	0.772542
160407	NPS-D1-000013-C08	17.47	0.772207
416194	NPS-D1-000006-G05	4.9	0.772184
203960	NPS-D1-000010-E10	10	0.771626
220875	NPS-D1-000002-B04	5.1	0.769914
416150	NPS-D1-000001-G12	5.07	0.769824
160413	NPS-D1-000013-A07	14.69	0.769823
206514	NPS-D1-000004-E12	5.3	0.769705
95752	NPS-D1-000004-E03	5.02	0.769002
423151	NPS-D1-000009-A08	5.05	0.768525
206518	NPS-D1-000007-G04	4.9	0.767796
418097	NPS-D1-000009-G06	5.14	0.767781
204757	NPS-D1-000011-D08	10	0.767042
220753	NPS-D1-000004-H12	5.6	0.764533
220726	NPS-D1-000002-H03	4.8	0.763795
209587	NPS-D1-000003-E04	5.1	0.763432
203938	NPS-D1-000010-D10	10	0.763065
416561	NPS-D1-000006-E04	5.02	0.762706
416289	NPS-D1-000006-E05	5.22	0.761362
205621	NPS-D1-000010-A06	10	0.760579
205004	NPS-D1-000012-C05	10	0.76
91841	NPS-D1-000004-H06	4.97	0.759148
416278	NPS-D1-000006-D08	4.97	0.758764
204073	NPS-D1-000011-H08	10	0.758287
416259	NPS-D1-000006-E06	4.73	0.757849
209583	NPS-D1-000002-F11	4.97	0.757807
260804	NPS-D1-000003-D03	5	0.75759
417757	NPS-D1-000009-E06	5.27	0.754207
204051	NPS-D1-000011-C04	10	0.753529
417267	NPS-D1-000009-A04	5.01	0.753339
203849	NPS-D1-000010-G11	10	0.752879
220887	NPS-D1-000004-G05	5.3	0.752819
220720	NPS-D1-000007-B05	5.2	0.750865
203803	NPS-D1-000011-D06	10	0.75045
205158	NPS-D1-000010-C09	10	0.748196
203956	NPS-D1-000010-C03	10	0.745672
204097	NPS-D1-000009-B12	10	0.744099
204028	NPS-D1-000011-E05	10	0.738835
91948	NPS-D1-000004-H03	4.94	0.738491
205376	NPS-D1-000009-D09	10	0.738206
416481	NPS-D1-000008-D03	5.14	0.737984
417329	NPS-D1-000009-F04	4.85	0.737033
205692	NPS-D1-000011-H10	10	0.736969
167369	NPS-D1-000013-G06	14.34	0.73687
203979	NPS-D1-000011-D04	10	0.734539
219322	NPS-D1-000004-H08	5.3	0.734516
219348	NPS-D1-000003-A10	4.8	0.734358
416332	NPS-D1-000006-H07	4.91	0.733762
220790	NPS-D1-000002-C04	5.1	0.733483
260799	NPS-D1-000004-B05	5.1	0.733229
205331	NPS-D1-000011-F07	10	0.730337
416422	NPS-D1-000006-H10	5.05	0.72901
205689	NPS-D1-000010-F11	10	0.728836
204076	NPS-D1-000009-C12	10	0.728833
167444	NPS-D1-000012-D09	11.56	0.72852
206547	NPS-D1-000001-G04	5.4	0.725937
260326	NPS-D1-000007-B03	5.1	0.725751
206064	NPS-D1-000011-C06	10	0.72402
205348	NPS-D1-000010-F09	10	0.723946
91800	NPS-D1-000005-D05	4.99	0.723655
204063	NPS-D1-000010-H09	10	0.722864
416847	NPS-D1-000008-A11	4.96	0.72185
204685	NPS-D1-000011-G04	10	0.721261
220893	NPS-D1-000007-D05	4.8	0.721119
203878	NPS-D1-000012-B05	10	0.72
206056	NPS-D1-000012-D05	10	0.72
416435	NPS-D1-000001-D08	4.51	0.719414
167356	NPS-D1-000013-B05	14.3	0.718761
220819	NPS-D1-000002-B12	5.2	0.718488
226630	NPS-D1-000007-F05	4.6	0.717325
92290	NPS-D1-000004-F05	5.03	0.716674
204852	NPS-D1-000009-A10	10	0.716257
180769	NPS-D1-000012-G10	3.46	0.715946
416208	NPS-D1-000006-A06	4.55	0.715094
416322	NPS-D1-000006-F10	5.25	0.713915
416202	NPS-D1-000006-H05	5.22	0.713881
416601	NPS-D1-000001-B06	4.97	0.71325
220793	NPS-D1-000002-A12	5	0.711298
91848	NPS-D1-000005-B07	5.02	0.710874
91751	NPS-D1-000002-G11	4.85	0.710078
203937	NPS-D1-000012-G04	10	0.71
226612	NPS-D1-000005-H07	4.7	0.708534
416638	NPS-D1-000008-A09	5.32	0.708266
423153	NPS-D1-000009-G08	5.14	0.707731
220798	NPS-D1-000003-H06	5	0.706352
205603	NPS-D1-000010-D06	10	0.706297
180788	NPS-D1-000012-B09	3.76	0.705638
204084	NPS-D1-000011-D09	10	0.704247
416211	NPS-D1-000004-B09	4.89	0.702965
416541	NPS-D1-000008-E05	5.31	0.702381
180865	NPS-D1-000012-E08	13.23	0.701171
423354	NPS-D1-000003-G07	4.64	0.699976
203847	NPS-D1-000010-F12	10	0.699967
203912	NPS-D1-000011-F05	10	0.69993
416767	NPS-D1-000008-C10	5.17	0.696602
416775	NPS-D1-000008-D10	4.79	0.696549
205037	NPS-D1-000009-G09	10	0.695319
203813	NPS-D1-000011-F10	10	0.691657
417628	NPS-D1-000009-H05	5.03	0.691505
205841	NPS-D1-000011-G07	10	0.691211
203864	NPS-D1-000011-H07	10	0.690649
204765	NPS-D1-000009-E10	10	0.690531
204119	NPS-D1-000012-E06	10	0.69
180833	NPS-D1-000012-C08	14.69	0.687281
423277	NPS-D1-000003-H07	4.57	0.685795
220863	NPS-D1-000002-E11	4.9	0.683145
91891	NPS-D1-000004-G06	5.29	0.680393
205327	NPS-D1-000012-D06	10	0.68
416674	NPS-D1-000008-C09	5.1	0.679453
167362	NPS-D1-000013-E09	14.64	0.675652
260781	NPS-D1-000007-H03	5.2	0.674961
423161	NPS-D1-000009-H08	5.08	0.674493
205601	NPS-D1-000011-D11	10	0.673899
220785	NPS-D1-000004-F12	5.1	0.67302
220890	NPS-D1-000003-D10	5.3	0.672455
416256	NPS-D1-000006-C06	5.2	0.670737
180795	NPS-D1-000013-H05	23.48	0.67
209592	NPS-D1-000003-A06	4.9	0.66995
204423	NPS-D1-000009-A11	10	0.669242
203981	NPS-D1-000009-B11	10	0.668127
209579	NPS-D1-000005-H06	4.95	0.667875
91637	NPS-D1-000003-H09	4.84	0.667728
160384	NPS-D1-000012-D08	35.18	0.66711
220736	NPS-D1-000007-G10	5.2	0.666523
260349	NPS-D1-000002-E05	5.3	0.663342
204125	NPS-D1-000010-E08	10	0.66306
203872	NPS-D1-000010-G06	10	0.661402
260776	NPS-D1-000005-C06	5.1	0.660821
205645	NPS-D1-000012-B03	10	0.66
205791	NPS-D1-000012-G05	10	0.66
416268	NPS-D1-000006-D07	4.91	0.65952
167344	NPS-D1-000013-E08	13.48	0.658495
180842	NPS-D1-000012-B10	3.98	0.657934
226604	NPS-D1-000004-E08	5.2	0.656512
260321	NPS-D1-000003-C05	5.2	0.655968
91380	NPS-D1-000007-C06	5.02	0.65581
220835	NPS-D1-000002-C06	4.8	0.655687
95963	NPS-D1-000007-F04	5.06	0.654919
91850	NPS-D1-000007-F03	4.99	0.65426
220864	NPS-D1-000007-A04	4.7	0.653877
180779	NPS-D1-000013-H07	19.63	0.653667
204952	NPS-D1-000012-H05	10	0.65
205218	NPS-D1-000011-C10	10	0.648972
220746	NPS-D1-000002-H05	5.3	0.648499
204070	NPS-D1-000010-B06	10	0.648304
416822	NPS-D1-000008-B10	4.94	0.648215
417095	NPS-D1-000007-A07	4.75	0.648069
203448	NPS-D1-000003-D06	5.4	0.647137
203953	NPS-D1-000010-H08	10	0.64693
180823	NPS-D1-000012-C10	11.98	0.646383
416655	NPS-D1-000008-G07	5.14	0.645752
417182	NPS-D1-000009-F03	4.7	0.644688
260311	NPS-D1-000002-E04	5	0.644461
423150	NPS-D1-000009-E07	4.54	0.644102
417319	NPS-D1-000009-D04	4.83	0.643832
95632	NPS-D1-000004-B12	4.84	0.643443
226628	NPS-D1-000005-E06	5.1	0.642794
205840	NPS-D1-000009-H10	10	0.642586
205914	NPS-D1-000009-C11	10	0.640849
205237	NPS-D1-000011-A05	10	0.640649
204839	NPS-D1-000011-B12	10	0.640087
91582	NPS-D1-000005-A07	5.18	0.638111
180775	NPS-D1-000012-F09	14.47	0.637703
220728	NPS-D1-000003-C06	5	0.632072
180848	NPS-D1-000012-H10	22.57	0.631668
92291	NPS-D1-000005-B08	4.91	0.630188
203993	NPS-D1-000011-G12	10	0.629229
416244	NPS-D1-000004-H11	4.64	0.628297
204966	NPS-D1-000010-H11	10	0.627046
203797	NPS-D1-000010-C08	10	0.626946
167340	NPS-D1-000012-H08	12.49	0.625913
260798	NPS-D1-000002-H04	5.1	0.625849
220708	NPS-D1-000004-A07	5.1	0.625064
260336	NPS-D1-000005-G11	5	0.625009
91890	NPS-D1-000003-F03	4.93	0.624108
220811	NPS-D1-000002-C12	4.9	0.623334
220714	NPS-D1-000005-D07	5.1	0.622982
180835	NPS-D1-000013-A04	20.93	0.622305
220842	NPS-D1-000003-B09	4.9	0.621745
417067	NPS-D1-000009-C03	5.29	0.621189
180816	NPS-D1-000012-F12	16.54	0.620424
91525	NPS-D1-000002-C03	5.05	0.61963
220773	NPS-D1-000007-A05	5	0.618596
205537	NPS-D1-000012-B08	10	0.617997
180831	NPS-D1-000012-D11	12.01	0.617844
92423	NPS-D1-000007-D03	4.87	0.616309
206060	NPS-D1-000011-A08	10	0.611847
260322	NPS-D1-000004-B11	4.7	0.610785
204737	NPS-D1-000012-G03	10	0.61
417376	NPS-D1-000009-E04	4.95	0.60979
167371	NPS-D1-000012-F11	13.07	0.608818
203868	NPS-D1-000010-G07	10	0.608415
180762	NPS-D1-000013-A10	15.96	0.607988
205419	NPS-D1-000011-F12	10	0.606824
220745	NPS-D1-000007-B06	5.1	0.606051
417009	NPS-D1-000006-G06	4.96	0.606017
220883	NPS-D1-000003-D09	5	0.605985
220777	NPS-D1-000005-A03	5.2	0.604054
180820	NPS-D1-000013-D06	13.33	0.603017
167358	NPS-D1-000012-B12	13.4	0.600324
203860	NPS-D1-000012-B04	10	0.6
220876	NPS-D1-000003-E09	5.3	0.597231
91798	NPS-D1-000005-E11	5.01	0.596988
203811	NPS-D1-000010-C07	10	0.595446
220762	NPS-D1-000007-H05	5.1	0.592479
220846	NPS-D1-000003-B10	5.1	0.591679
167348	NPS-D1-000013-F08	12.24	0.589209
416320	NPS-D1-000006-C05	4.84	0.58834
204058	NPS-D1-000011-A07	10	0.586917
167373	NPS-D1-000012-H09	9.65	0.58682
167364	NPS-D1-000012-D12	14.38	0.583624
220761	NPS-D1-000003-B05	5.1	0.582656
209566	NPS-D1-000005-G03	5.28	0.582165
205450	NPS-D1-000010-D05	10	0.58197
203876	NPS-D1-000011-C12	10	0.581012
180794	NPS-D1-000013-B03	29.66	0.580319
205520	NPS-D1-000012-H03	10	0.58
205477	NPS-D1-000012-H04	10	0.58
205539	NPS-D1-000010-B07	10	0.578079
167347	NPS-D1-000013-G03	15.13	0.577971
417015	NPS-D1-000009-A03	4.7	0.577726
416839	NPS-D1-000008-H10	4.94	0.5768
416188	NPS-D1-000004-E09	4.94	0.575461
204027	NPS-D1-000010-B12	10	0.574686
167353	NPS-D1-000012-H12	20.19	0.574141
204151	NPS-D1-000011-C09	10	0.573298
91741	NPS-D1-000007-D08	5.1	0.572935
416286	NPS-D1-000006-E08	4.75	0.572107
220855	NPS-D1-000003-C10	5.1	0.570743
205329	NPS-D1-000012-F05	10	0.57
203827	NPS-D1-000011-A11	10	0.569912
416862	NPS-D1-000008-G10	4.94	0.569783
204133	NPS-D1-000010-C12	10	0.569487
203943	NPS-D1-000009-E11	10	0.56885
220838	NPS-D1-000005-D10	4.5	0.567628
204086	NPS-D1-000009-G11	10	0.567311
204032	NPS-D1-000011-H12	10	0.566968
209560	NPS-D1-000003-E08	5.32	0.566736
417150	NPS-D1-000009-E03	4.87	0.56648
204689	NPS-D1-000010-A08	10	0.566176
260347	NPS-D1-000005-F09	5	0.560666
220771	NPS-D1-000004-E07	5.1	0.560631
180861	NPS-D1-000013-B04	10.48	0.559032
220742	NPS-D1-000005-F06	4.8	0.556982
416273	NPS-D1-000006-D05	5.11	0.555461
95981	NPS-D1-000007-G05	4.87	0.554999
204131	NPS-D1-000012-G07	10	0.554818
220896	NPS-D1-000002-D11	5.3	0.552793
203961	NPS-D1-000011-C11	10	0.552471
203819	NPS-D1-000012-C03	10	0.55
416195	NPS-D1-000004-A09	5.21	0.549542
220732	NPS-D1-000005-G08	4.8	0.548265
220752	NPS-D1-000003-F08	4.9	0.547232
220816	NPS-D1-000003-B06	5.3	0.546484
180843	NPS-D1-000013-F09	4.53	0.544978
226626	NPS-D1-000005-E10	4.8	0.542647
220886	NPS-D1-000005-G07	4.5	0.540425
204134	NPS-D1-000012-A05	10	0.54
167366	NPS-D1-000012-F10	12.09	0.538816
205323	NPS-D1-000011-H09	10	0.53854
180777	NPS-D1-000013-H08	18.16	0.537954
96011	NPS-D1-000007-F06	4.95	0.533797
95774	NPS-D1-000004-C11	5.04	0.533561
416610	NPS-D1-000008-D07	4.67	0.53287
220707	NPS-D1-000002-E03	5	0.53087
220877	NPS-D1-000003-E03	5.2	0.528292
205497	NPS-D1-000010-E07	10	0.527499
204725	NPS-D1-000010-H07	10	0.52582
95799	NPS-D1-000003-D08	4.99	0.524698
180773	NPS-D1-000012-H11	7.27	0.523861
91981	NPS-D1-000003-G10	5.04	0.523538
204069	NPS-D1-000010-D12	10	0.522691
167350	NPS-D1-000013-A08	13.87	0.52154
204122	NPS-D1-000010-A09	10	0.519451
180866	NPS-D1-000012-C11	14.72	0.517959
416594	NPS-D1-000008-B07	4.76	0.51751
220820	NPS-D1-000002-C11	5	0.516794
167342	NPS-D1-000012-G08	22.78	0.512472
204053	NPS-D1-000010-B05	10	0.510661
167349	NPS-D1-000012-G11	15.32	0.505992
220889	NPS-D1-000007-E06	4.8	0.505724
205548	NPS-D1-000010-A12	10	0.504606
91654	NPS-D1-000005-C05	4.89	0.504311
167360	NPS-D1-000012-G12	13.98	0.503478
220802	NPS-D1-000005-A11	5	0.503298
204749	NPS-D1-000009-H11	10	0.502646
167341	NPS-D1-000013-D09	13.04	0.501194
180798	NPS-D1-000012-G09	15.7	0.500671
91790	NPS-D1-000005-G10	4.96	0.495606
205335	NPS-D1-000010-B09	10	0.49526
203848	NPS-D1-000010-D07	10	0.493001
226603	NPS-D1-000005-B10	4.9	0.487986
260343	NPS-D1-000005-H11	5.2	0.48736
209582	NPS-D1-000005-C09	5.44	0.485117
206509	NPS-D1-000004-E10	5.4	0.484333
203889	NPS-D1-000010-F07	10	0.484175
167339	NPS-D1-000012-D10	17	0.483407
167334	NPS-D1-000013-G04	19.19	0.48308
203975	NPS-D1-000010-A04	10	0.481173
220739	NPS-D1-000005-F08	5.1	0.480594
180796	NPS-D1-000013-F03	20.21	0.479799
417300	NPS-D1-000009-B04	4.84	0.479735
220794	NPS-D1-000003-C09	5.1	0.478469
417307	NPS-D1-000009-C04	5.21	0.476345
417266	NPS-D1-000009-H03	5.23	0.475214
220715	NPS-D1-000005-F11	5.1	0.473927
205894	NPS-D1-000010-C05	10	0.473375
203877	NPS-D1-000010-H03	10	0.47195
205345	NPS-D1-000009-F12	10	0.469816
92064	NPS-D1-000005-F07	4.9	0.469498
226619	NPS-D1-000005-F10	4.9	0.464633
220768	NPS-D1-000005-H10	4.9	0.46448
204044	NPS-D1-000011-G11	10	0.463634
220884	NPS-D1-000005-D09	5.2	0.462336
204760	NPS-D1-000012-E04	10	0.46
167337	NPS-D1-000013-A03	14.62	0.458951
220718	NPS-D1-000005-C11	4.9	0.4571
226636	NPS-D1-000005-D08	4.9	0.457062
92051	NPS-D1-000005-G06	4.97	0.452043
205614	NPS-D1-000012-D04	10	0.45
260330	NPS-D1-000005-A04	5	0.449922
204754	NPS-D1-000010-E05	10	0.447752
220719	NPS-D1-000005-C10	4.8	0.447634
167352	NPS-D1-000013-C10	18.72	0.446032
167336	NPS-D1-000013-B09	15.84	0.445525
203815	NPS-D1-000011-E08	10	0.445453
91593	NPS-D1-000005-C08	4.98	0.444867
205305	NPS-D1-000012-F07	10	0.442974
203899	NPS-D1-000011-D12	10	0.442427
180836	NPS-D1-000013-G09	17.45	0.441405
204055	NPS-D1-000011-A12	10	0.437377
416801	NPS-D1-000008-B09	5.29	0.433626
220845	NPS-D1-000003-H10	4.9	0.431209
220849	NPS-D1-000005-B09	5.3	0.426605
260315	NPS-D1-000005-A10	5.4	0.424279
203856	NPS-D1-000011-E12	10	0.422572
167445	NPS-D1-000012-C12	9.31	0.413925
260309	NPS-D1-000005-H09	5.3	0.405611
203817	NPS-D1-000011-F11	10	0.404244
205897	NPS-D1-000010-F04	10	0.403688
160440	NPS-D1-000012-E12	20.14	0.394651
416661	NPS-D1-000008-H08	4.89	0.392203
204683	NPS-D1-000011-B11	10	0.38206
423169	NPS-D1-000009-A09	4.72	0.37568
220727	NPS-D1-000005-G09	5	0.374572
220834	NPS-D1-000005-F03	4.9	0.366394
160376	NPS-D1-000013-B10	32.41	0.365911
167338	NPS-D1-000013-D08	14.27	0.361615
91664	NPS-D1-000005-C04	4.84	0.346402
260312	NPS-D1-000005-A09	5.3	0.342243
416204	NPS-D1-000004-F09	4.8	0.336136
204054	NPS-D1-000010-G03	10	0.326818
203992	NPS-D1-000010-F03	10	0.326313
167367	NPS-D1-000012-A11	11.5	0.324124
220839	NPS-D1-000002-B05	5.2	0.318785
220717	NPS-D1-000005-E03	5.2	0.315184
91589	NPS-D1-000005-F04	4.93	0.30578
95985	NPS-D1-000005-B04	5.06	0.304654
260784	NPS-D1-000005-G04	5.1	0.296818
206542	NPS-D1-000005-H03	4.6	0.293934
209593	NPS-D1-000005-E07	5	0.29228
205688	NPS-D1-000010-G04	10	0.281766
91688	NPS-D1-000005-D04	5.14	0.281468
204057	NPS-D1-000010-E04	10	0.278904
220841	NPS-D1-000005-E04	4.9	0.278872
91789	NPS-D1-000005-H04	5.08	0.26657
416706	NPS-D1-000008-D09	4.99	0.258344
205392	NPS-D1-000010-D04	10	0.255603
180826	NPS-D1-000012-B11	16.77	0.242046
205863	NPS-D1-000010-A05	10	0.227419
203806	NPS-D1-000011-E06	10	0.209042
205549	NPS-D1-000009-A12	10	0.0643777
423170	NPS-D1-000001-F05	4.86	nd*
423162	NPS-D1-000001-H06	4.87	nd
220862	NPS-D1-000002-B09	4.9	nd
220800	NPS-D1-000002-F03	5.1	nd
220870	NPS-D1-000002-F08	4.9	nd
220751	NPS-D1-000002-F10	5.2	nd
226599	NPS-D1-000002-G08	4.8	nd
220894	NPS-D1-000003-B03	5.3	nd
206530	NPS-D1-000003-E05	5.6	nd
220735	NPS-D1-000004-A11	5.2	nd
206531	NPS-D1-000004-B10	5	nd
92338	NPS-D1-000004-C10	4.93	nd
220851	NPS-D1-000004-F08	4.8	nd
206532	NPS-D1-000004-G03	5.3	nd
209558	NPS-D1-000005-B11	5.5	nd
219345	NPS-D1-000005-C03	4.9	nd
220747	NPS-D1-000005-D11	5.3	nd
220767	NPS-D1-000005-E09	4.9	nd
416764	NPS-D1-000006-B03	5.06	nd
416776	NPS-D1-000006-E03	5.06	nd
416290	NPS-D1-000006-E10	4.99	nd
416445	NPS-D1-000006-E11	4.9	nd
416272	NPS-D1-000006-F09	5.11	nd
260785	NPS-D1-000007-A03	5.3	nd
219391	NPS-D1-000007-A06	5	nd
424978	NPS-D1-000007-A08	5.1	nd
95724	NPS-D1-000007-A09	4.97	nd
209584	NPS-D1-000007-B09	5.33	nd
220826	NPS-D1-000007-C05	5	nd
226643	NPS-D1-000007-C08	5	nd
260806	NPS-D1-000007-C09	4.8	nd
220748	NPS-D1-000007-D06	5.2	nd
226615	NPS-D1-000007-D09	4.7	nd
219358	NPS-D1-000007-E03	5.2	nd
220895	NPS-D1-000007-E04	5.3	nd
417264	NPS-D1-000007-E07	4.73	nd
91931	NPS-D1-000007-E08	5.09	nd
91834	NPS-D1-000007-E09	5.06	nd
417296	NPS-D1-000007-F07	4.99	nd
206533	NPS-D1-000007-F08	5.5	nd
91879	NPS-D1-000007-F09	5.11	nd
220804	NPS-D1-000007-G03	4.7	nd
220779	NPS-D1-000007-G06	5.1	nd
417305	NPS-D1-000007-G07	4.57	nd
220770	NPS-D1-000007-G08	5.4	nd
220787	NPS-D1-000007-G09	4.8	nd
424962	NPS-D1-000007-H07	4.86	nd
226602	NPS-D1-000007-H08	5.1	nd
95616	NPS-D1-000007-H09	4.89	nd
92341	NPS-D1-000007-H11	5.03	nd
416871	NPS-D1-000008-B11	4.57	nd
417026	NPS-D1-000008-B12	5	nd
416602	NPS-D1-000008-C07	4.98	nd
416899	NPS-D1-000008-C11	4.95	nd
416844	NPS-D1-000008-D11	5.09	nd
416765	NPS-D1-000008-F09	5.16	nd
416660	NPS-D1-000008-G08	5.01	nd
416758	NPS-D1-000008-G09	5.05	nd
417014	NPS-D1-000008-G12	4.98	nd
416576	NPS-D1-000008-H04	5.28	nd
416600	NPS-D1-000008-H07	4.92	nd
417030	NPS-D1-000008-H12	5.09	nd
205279	NPS-D1-000009-F10	10	nd
204174	NPS-D1-000009-F11	10	nd
204102	NPS-D1-000009-G10	10	nd
203799	NPS-D1-000010-A11	10	nd
203796	NPS-D1-000010-B03	10	nd
205370	NPS-D1-000010-B04	10	nd
205394	NPS-D1-000010-C04	10	nd
204214	NPS-D1-000010-D03	10	nd
203971	NPS-D1-000010-E03	10	nd
203839	NPS-D1-000010-F10	10	nd
203896	NPS-D1-000010-H05	10	nd
203893	NPS-D1-000010-H12	10	nd
203970	NPS-D1-000011-A10	10	nd
204059	NPS-D1-000011-B10	10	nd
206059	NPS-D1-000011-E03	10	nd
204011	NPS-D1-000011-E04	10	nd
203972	NPS-D1-000011-E11	10	nd
203821	NPS-D1-000011-G10	10	nd
205670	NPS-D1-000011-H11	10	nd
203946	NPS-D1-000012-A04	10	nd
167363	NPS-D1-000012-A10	13.07	nd
203894	NPS-D1-000012-B07	10	nd
204085	NPS-D1-000012-D07	10	nd
167365	NPS-D1-000012-E09	15.16	nd
204038	NPS-D1-000012-F04	10	nd
203898	NPS-D1-000012-H06	10	nd
180766	NPS-D1-000013-A06	14.09	nd
180806	NPS-D1-000013-D03	29.96	nd
167357	NPS-D1-000013-E03	14.98	nd
180778	NPS-D1-000013-G08	30.03	nd
180863	NPS-D1-000013-H09	31.36	nd
*nd, not determined
