# Supplementary material for: FOXO1 Is a Key Mediator of Glucocorticoid-Induced Expression of Tristetraprolin in MDA-MB-231 Breast Cancer Cells
Source: Int J Mol Sci. 2022 Nov 8;23(22):13673. doi: 10.3390/ijms232213673 (PMC9693238; doi:10.3390/ijms232213673)
Supplement: Supplementary file 1 [file ijms-23-13673-s001.zip › Table S3. DEGs-no treatment vs DXM 21-P or BTM 21-P 3h.xlsx]

## Sheet: Data
Filter: 24424		Fold change			p-value			Average of normalized data (log2)			Normalized data (log2)												Raw data												Annotation											Gene information
ID	Gene symbol	Beta21 /No_treat	Dexa /No_treat	Dexa /Beta21	Beta21 /No_treat	Dexa /No_treat	Dexa /Beta21	No_treat	Beta21	Dexa	N1	N2	N3	N4	B1	B2	B3	B4	D1	D2	D3	D4	N1	N2	N3	N4	B1	B2	B3	B4	D1	D2	D3	D4	Entrez ID	chromosome	start	end	width	strand	transcript_id	Biotype	Aliases	p_id	Description	NCBI search
1	A1BG	1.11422	1.08574	0.974436	0.0875808	0.167597	0.710806	0.977705	1.13374	1.09638	0.926379	1.01721	1.03308	0.930871	1.2499	1.16527	0.924064	1.17545	1.15847	1.0919	1.21876	0.896456	0.891642	1.01456	1.04651	0.910978	1.37636	1.23895	0.903269	1.25801	1.24084	1.12631	1.33316	0.866691	1	chr19	58858172	58864865	1766	-	NM_130786	protein_coding	A1B|ABG|DKFZp686F0970|GAB|HYST2477	P6083	alpha-1-B glycoprotein	A1BG
2	A1BG-AS1	1.01895	0.996634	0.978098	0.825737	0.968867	0.655168	0.45971	0.486795	0.454846	0.27456	0.60335	0.24518	0.666261	0.474475	0.602322	0.373426	0.487813	0.320383	0.474267	0.453246	0.561258	0.206805	0.514715	0.185274	0.589439	0.388752	0.516516	0.297636	0.402084	0.251199	0.387175	0.371091	0.478154	503538	chr19	58863336	58866549	2130	+	NR_015380	lncRNA	.	.	A1BG antisense RNA 1	A1BG-AS1
3	A1CF	1.00057	1.00376	1.00319	0.927045	0.54641	0.589627	0.0173042	0.0181205	0.0227123	0.0161317	0.0239655	0	0.028953	0.0313286	0.0088213	0.0241305	0.00806359	0.0213627	0.0217492	0.0101055	0.0374997	0.0110074	0.016438	0	0.0204549	0.0218884	0.00607638	0.0170738	0.00559618	0.015156	0.0150362	0.00711917	0.0265924	29974	chr10	52559169	52645435	9505	-	NM_001198818	protein_coding	ACF|ACF64|ACF65|APOBEC1CF|ASP|MGC163391	P5928	APOBEC1 complementation factor	A1CF
4	A2M	0.994328	1.00154	1.00725	0.13405	0.781402	0.135374	0.00820766	1.89394e-06	0.0104305	0.0164069	0.0163309	0	0	2.17723e-06	4.64264e-06	0	7.55889e-07	0	0.0221208	0	0.0194503	0.011217	0.0111652	0	0	0	0	0	0	0	0.0153063	0	0.0137237	2	chr12	9220304	9268558	4653	-	NM_000014	protein_coding	CPAMD5|DKFZp779B086|S863-7	P15056	alpha-2-macroglobulin	A2M
5	A2M-AS1	0.995355	1.01408	1.01882	0.744078	0.431075	0.245289	0.0260722	0.0193559	0.0462489	0.0363978	6.412e-05	0	0.0667441	1.0909e-05	0.0398941	0.0370011	3.78738e-06	0.0488	0.0489004	0	0.086004	0.0251106	0	0	0.047692	0	0.0278689	0.0262712	0	0.0348475	0.0341938	0	0.0619039	144571	chr12	9217773	9220651	2187	+	NR_026971	lncRNA	.	.	A2M antisense RNA 1 (head to head)	A2M-AS1
6	A2ML1	1.00357	0.999999	0.99644	0.356012	0.288923	0.355897	1.80253e-06	0.00514577	4.72905e-07	3.61059e-06	3.59951e-06	0	0	6.12391e-07	1.30584e-06	0.0204718	2.1261e-07	0	1.89162e-06	0	0	0	0	0	0	0	0	0.0144579	0	0	0	0	0	144568	chr12	8975150	9029381	5363	+	NM_144670	protein_coding	CPAMD9|DKFZp686C1729|DKFZp686D2011|DKFZp686G1812|DKFZp686L1821|DKFZp686O1010|FLJ16045|FLJ25179|FLJ39129|FLJ41597|FLJ41598|FLJ41607	P32594	alpha-2-macroglobulin like 1	A2ML1
7	A2MP1	1	1	1	1	1	1	0	0	0	0	0	0	0	0	0	0	0	0	0	0	0	0	0	0	0	0	0	0	0	0	0	0	0	3	chr12	9381129	9386803	1201	-	NR_040112	misc_RNA	A2MP	.	alpha-2-macroglobulin pseudogene 1	A2MP1
8	A3GALT2	1.00305	0.96247	0.959543	0.952244	0.268483	0.423007	0.0852849	0.0896795	0.0300987	0.166387	0.000145274	0.0881248	0.0816894	2.47164e-05	5.2704e-05	0.25435	0.0890689	0.116731	7.63458e-05	0	0	0.120914	0	0.0629987	0.0586831	0	0	0.193958	0.0636315	0.0851419	0	0	0	127550	chr1	33772367	33786699	1023	-	NM_001080438	protein_coding	IGBS3S	P20083	alpha 1,3-galactosyltransferase 2	A3GALT2
9	A4GALT	1.20308	1.31289	1.09127	8.88312e-05	1.00263e-05	8.01897e-05	2.59522	2.86195	2.98796	2.59194	2.5084	2.64119	2.63548	2.88392	2.85882	2.84911	2.85572	2.99042	3.00541	2.9986	2.95695	4.9837	4.64655	5.23903	5.23757	6.37256	6.23537	6.23961	6.23556	6.99302	7.00058	7.02151	6.79771	53947	chr22	43088127	43116876	2092	-	NM_017436	protein_coding	A14GALT|A4GALT1|Gb3S|P(k)|P1|PK	P6229	alpha 1,4-galactosyltransferase	A4GALT
10	A4GNT	1.11445	1.0518	0.943787	0.0129836	0.288433	0.275611	0.0449806	0.201313	0.117847	0.0901359	0.0458157	0	0.0425604	0.132152	0.145788	0.221071	0.299968	0.0614646	0.283302	0.0581494	0.0549521	0.0634865	0.0316043	0	0.0302677	0.0957161	0.105856	0.166731	0.230993	0.0441731	0.215915	0.0415274	0.0392678	51146	chr3	137842560	137851229	1771	-	NM_016161	protein_coding	MGC149493|alpha4GnT	P35591	alpha-1,4-N-acetylglucosaminyltransferase	A4GNT
11	AA06	1	1	1	1	1	1	0	0	0	0	0	0	0	0	0	0	0	0	0	0	0	0	0	0	0	0	0	0	0	0	0	0	0	100506677	chr17	31856806	31860779	632	-	NR_037584	misc_RNA	.	.	uncharacterized LOC100506677	AA06
12	AAAS	0.996764	1.02012	1.02344	0.932104	0.639224	0.476193	4.51271	4.50803	4.54145	4.53163	4.60116	4.37811	4.53086	4.52447	4.54964	4.43271	4.52261	4.53213	4.61933	4.56248	4.4465	21.945	23.0801	19.7963	22.2107	21.9833	22.3523	20.7106	21.974	22.2887	23.4771	22.7267	20.909	8086	chr12	53701240	53715412	1837	-	NM_001173466	protein_coding	AAA|AAASb|ADRACALA|ADRACALIN|ALADIN|DKFZp586G1624	P16676	aladin WD repeat nucleoporin	AAAS
13	AACS	0.986887	0.986391	0.999498	0.756747	0.787935	0.990159	3.22292	3.20388	3.20315	3.2285	3.26407	3.07302	3.31498	3.23709	3.18085	3.26181	3.13227	3.27796	3.12326	3.11073	3.2909	8.30308	8.53596	7.41613	8.98938	8.41696	8.04378	8.63859	7.76423	8.75895	7.67886	7.67251	8.83059	65985	chr12	125549925	125627871	3321	+	NM_023928	protein_coding	ACSF1|FLJ12389|FLJ41251|SUR-5	P20974	acetoacetyl-CoA synthetase	AACS
14	AACSP1	0.982585	0.993108	1.01071	0.362403	0.780233	0.581752	0.034763	0.00941672	0.0247861	4.8218e-05	4.807e-05	0.0368609	0.0997775	8.1783e-06	1.74391e-05	0.0372759	2.83934e-06	0	0.0966876	0	0	0	0	0.0258847	0.0720524	0	0	0.0264602	0	0	0.06887	0	0	729522	chr5	178191864	178203277	2173	-	NR_024035	misc_RNA	AACSL	.	acetoacetyl-CoA synthetase pseudogene 1	AACSP1
15	AADAC	0.938483	1.00778	1.07384	0.142358	0.863976	0.171994	0.181348	0.089751	0.192536	0.14766	0.236818	0.241696	0.0938677	0.192908	0.0562222	0.102896	1.98934e-05	0.197711	0.312926	0.187177	0.0613553	0.106374	0.176522	0.182406	0.0677745	0.142786	0.0394492	0.0746679	0	0.148256	0.241049	0.139378	0.0439515	13	chr3	151531861	151546276	1606	+	NM_001086	protein_coding	CES5A1|DAC	P33125	arylacetamide deacetylase	AADAC
16	AADACL2	1	1	1	1	1	1	0	0	0	0	0	0	0	0	0	0	0	0	0	0	0	0	0	0	0	0	0	0	0	0	0	0	0	344752	chr3	151451704	151475556	1500	+	NM_207365	protein_coding	MGC72001	P25651	arylacetamide deacetylase-like 2	AADACL2
17	AADACL2-AS1	1.02632	0.999993	0.974348	0.356012	0.288923	0.355897	1.32129e-05	0.0374938	3.46649e-06	2.64663e-05	2.6385e-05	0	0	4.48895e-06	9.57207e-06	0.144447	1.55847e-06	0	1.38659e-05	0	0	0	0	0	0	0	0	0.106032	0	0	0	0	0	101928142	chr3	151468967	151645963	772	-	NR_110202	lncRNA	.	.	AADACL2 antisense RNA 1	AADACL2-AS1
18	AADACL3	1	1	1	1	1	1	0	0	0	0	0	0	0	0	0	0	0	0	0	0	0	0	0	0	0	0	0	0	0	0	0	0	0	126767	chr1	12776118	12788726	4049	+	NM_001103170	protein_coding	.	P35826	arylacetamide deacetylase-like 3	AADACL3
19	AADACL4	1	1	1	1	1	1	0	0	0	0	0	0	0	0	0	0	0	0	0	0	0	0	0	0	0	0	0	0	0	0	0	0	0	343066	chr1	12704566	12727097	1575	+	NM_001013630	protein_coding	.	P28455	arylacetamide deacetylase-like 4	AADACL4
20	AADACP1	0.927956	0.763787	0.823085	0.141153	0.00113349	0.000130785	1.13644	1.02857	0.747686	1.22465	1.16339	0.960562	1.18311	1.04645	1.08799	0.973542	1.00371	0.708798	0.754389	0.729771	0.796312	1.32654	1.22984	0.946177	1.27586	1.06388	1.12233	0.969403	1.00462	0.640252	0.683073	0.662126	0.741222	201651	chr3	151488244	151502682	1289	+	NR_026915	misc_RNA	.	.	arylacetamide deacetylase pseudogene 1	AADACP1
21	AADAT	1.05846	1.05333	0.995158	0.414662	0.268267	0.950635	2.68612	2.76808	2.76108	2.66691	2.69618	2.70091	2.68022	2.73337	2.99694	2.74191	2.56692	2.6175	2.83888	2.69956	2.87355	5.30464	5.43426	5.50271	5.43325	5.64196	6.96329	5.72103	4.92284	5.17385	6.12826	5.52048	6.35943	51166	chr4	170981373	171011538	2396	-	NM_182662	protein_coding	KAT2|KATII	P18026	aminoadipate aminotransferase	AADAT
22	AAED1	1.10181	1.13352	1.02878	0.0919676	0.0768777	0.684529	3.99502	4.13489	4.17582	4.02146	3.94454	3.93931	4.07058	3.98895	4.07274	4.24064	4.2221	4.36099	4.19761	4.10341	4.01866	15.1108	14.2734	14.3424	15.8701	14.8564	15.7794	18.0001	17.6544	19.6775	17.2742	16.2595	15.2857	195827	chr9	99403533	99417599	1225	-	NM_153698	protein_coding	.	P14782	AhpC/TSA antioxidant enzyme domain containing 1	AAED1
23	AAGAB	1.01855	0.959272	0.941803	0.65785	0.33112	0.0297433	3.47021	3.49672	3.41022	3.3539	3.60496	3.45269	3.45808	3.45281	3.55944	3.47402	3.49841	3.45083	3.37362	3.37972	3.43514	9.14498	11.0774	9.94974	10.0325	9.93547	10.7576	10.1672	10.2962	10.0033	9.32287	9.45059	9.86597	79719	chr15	67493013	67547536	3584	-	NM_024666	protein_coding	DKFZp667D2317|DKFZp686G08119|FLJ11506|p34	P10185	alpha- and gamma-adaptin binding protein	AAGAB
24	AAK1	1.0411	1.02264	0.982266	0.331558	0.398662	0.672275	2.56136	2.61947	2.59366	2.61596	2.54425	2.56425	2.51923	2.54299	2.75504	2.55142	2.61828	2.54189	2.66454	2.61289	2.55188	5.08737	4.7918	4.915	4.75368	4.82095	5.73402	4.88942	5.13763	4.8576	5.31718	5.13968	4.88895	22848	chr2	69685127	69870977	21265	-	NM_014911	protein_coding	DKFZp686F03202|DKFZp686K16132|FLJ23712|FLJ25931|FLJ31060|FLJ42882|FLJ45252|KIAA1048|MGC138170|MGC164568|MGC164570	P29895	AP2 associated kinase 1	AAK1
25	AAMDC	0.989668	1.0493	1.06026	0.888398	0.731073	0.6428	4.3688	4.35382	4.43823	4.35541	4.42867	4.56046	4.09091	4.28424	4.38963	4.43252	4.30373	4.81834	4.05861	4.48615	4.28004	19.3066	20.3665	22.5981	16.1126	18.4577	19.9008	20.7054	18.74	27.3893	15.5911	21.503	18.5215	28971	chr11	77532208	77583398	504	+	NM_024684	protein_coding	.	P35088	adipogenesis associated, Mth938 domain containing	AAMDC
26	AAMP	1.02791	1.01303	0.985523	0.442959	0.832271	0.798538	6.0076	6.04731	6.02627	5.96436	6.02205	5.92879	6.10873	6.10515	6.02837	6.07583	5.97659	6.21001	5.85266	6.02256	5.9973	60.9259	63.456	59.9242	68.2975	67.7438	64.0777	66.8155	61.9394	73.5227	56.5362	64.2865	63.1946	14	chr2	219128852	219134932	1832	-	NM_001302545	protein_coding	.	P13280	angio associated migratory cell protein	AAMP
27	AANAT	0.982948	0.939284	0.955579	0.655241	0.0690565	0.150399	0.103169	0.0783563	0.0128027	0.085532	0.16516	0	0.155947	2.34189e-05	0.0462182	0.0892607	0.172311	0	7.23381e-05	0	0.0504732	0.0602266	0.119978	0	0.114801	0	0.032347	0.0644011	0.126782	0	0	0	0.0359691	15	chr17	74449433	74466199	2304	+	NM_001166579	protein_coding	SNAT	P17385	aralkylamine N-acetyltransferase	AANAT
28	AAR2	0.988603	1.00924	1.02088	0.672126	0.728092	0.318706	4.97681	4.96027	4.99008	4.92937	4.9808	4.93176	5.06132	4.93878	4.97793	4.91669	5.00604	4.96446	4.98381	4.96655	5.04406	29.2246	30.3236	29.5248	32.5259	29.6284	30.4224	29.3653	31.1191	30.4288	30.5094	30.3983	32.1509	25980	chr20	34824339	34844863	2486	+	NM_001271874	protein_coding	.	P16425	AAR2 splicing factor homolog	AAR2
29	AARD	0.897492	0.997943	1.11192	0.248309	0.982813	0.269523	0.960184	0.804155	0.957213	1.03311	0.889953	1.15492	0.727673	0.986266	0.642933	0.864383	0.697223	1.061	0.680176	1.12952	0.918123	1.03764	0.845262	1.22684	0.659485	0.979609	0.559199	0.825636	0.620986	1.09377	0.598884	1.19278	0.894495	441376	chr8	117950464	117956239	1786	+	NM_001025357	protein_coding	.	P36042	alanine and arginine rich domain containing protein	AARD
30	AARS	0.980272	0.964169	0.983572	0.539426	0.353484	0.658048	6.04	6.01125	5.98736	5.95384	6.10319	6.02663	6.072	5.96554	6.03678	6.08283	5.95606	6.09053	5.8877	5.9787	5.98532	60.4761	67.1879	64.1989	66.5555	61.4025	64.4587	67.145	61.0502	67.6022	57.9513	62.3322	62.6638	16	chr16	70286297	70323412	3344	-	NM_001605	protein_coding	CMT2N	P9555	alanyl-tRNA synthetase	AARS
31	AARS2	0.943424	0.906824	0.961204	0.139009	0.0527925	0.206349	2.99529	2.91127	2.85418	2.98042	3.1138	2.90091	2.97782	2.95885	2.89197	2.8783	2.91466	2.91501	2.78102	2.79775	2.91735	6.83521	7.59578	6.46968	6.90707	6.76548	6.40312	6.38836	6.53725	6.58771	5.84643	5.98064	6.58768	57505	chr6	44266463	44281063	4782	-	NM_020745	protein_coding	AARSL|KIAA1270|MT-ALARS|MTALARS|bA444E17.1	P3709	alanyl-tRNA synthetase 2, mitochondrial	AARS2
32	AARSD1	0.960993	0.993339	1.03366	0.300067	0.881073	0.395334	4.97545	4.91805	4.96581	4.95816	5.0607	5.01515	4.86009	4.87472	4.87186	4.97659	4.94618	5.04784	4.88733	5.03395	4.88585	29.8352	32.1102	31.3412	28.1632	28.2981	28.1943	30.6512	29.8136	32.2964	28.4702	31.8986	28.7097	80755	chr17	41102543	41116515	1364	-	NM_001261434	protein_coding	MGC2744	P23303	alanyl-tRNA synthetase domain containing 1	AARSD1
33	AASDH	0.926478	0.913797	0.986312	0.226848	0.346809	0.895594	2.2099	2.09973	2.07985	2.18235	2.22377	2.30837	2.11853	2.17611	2.11659	2.21113	1.87138	2.15303	2.3253	2.0736	1.69682	3.50938	3.64104	3.95363	3.35713	3.51432	3.32635	3.6501	2.65734	3.47158	3.99501	3.22392	2.25555	132949	chr4	57204451	57253674	4702	-	NM_001286670	protein_coding	ACSF4|LYS2|NRPS1098|NRPS998	P24992	aminoadipate-semialdehyde dehydrogenase	AASDH
34	AASDHPPT	1.00017	0.93852	0.938361	0.99123	0.0137295	0.0135472	5.02817	5.02842	4.93663	5.04218	4.98617	5.05677	5.02661	5.06297	5.00126	5.04382	5.00467	4.86968	4.96951	4.95036	4.9549	31.6852	30.4399	32.2877	31.7297	32.3822	30.9346	32.1609	31.0885	28.4328	30.1981	30.0484	30.1658	60496	chr11	105948292	105969419	2861	+	NM_015423	protein_coding	AASD-PPT|DKFZp566E2346|LYS2|LYS5	P9650	aminoadipate-semialdehyde dehydrogenase-phosphopantetheinyl transferase	AASDHPPT
35	AASS	1.0578	1.00617	0.951187	0.0325643	0.899378	0.286345	3.13818	3.21925	3.14705	3.17771	3.13019	3.17757	3.06425	3.23842	3.20718	3.18659	3.24404	3.20188	3.22988	3.1883	2.95136	7.9814	7.69007	8.04869	7.39683	8.42582	8.21067	8.14905	8.47032	8.25778	8.34566	8.15073	6.77076	10157	chr7	121713598	121784344	5871	-	NM_005763	protein_coding	LKR/SDH|LKRSDH|LORSDH	P1807	aminoadipate-semialdehyde synthase	AASS
36	AATBC	1.05268	0.999702	0.949675	0.360389	0.992171	0.284075	0.420092	0.494156	0.419662	0.521682	0.437297	0.326454	0.387836	0.334322	0.624715	0.458999	0.542711	0.40735	0.408458	0.434763	0.427878	0.431571	0.350447	0.253966	0.310157	0.26026	0.540252	0.377047	0.456462	0.329113	0.325441	0.353578	0.347405	284837	chr21	45225639	45232448	4598	-	NR_026961	lncRNA	.	.	apoptosis associated transcript in bladder cancer	AATBC
37	AATF	1.00222	0.998935	0.996726	0.968627	0.990005	0.964877	6.28787	6.29106	6.28633	6.06774	6.35247	6.36297	6.34761	6.37338	6.26965	6.3207	6.1945	6.43726	5.976	6.33965	6.35067	65.5207	80.0459	81.3168	80.7776	81.7896	75.9238	79.362	72.2012	86.2397	61.6689	80.3349	81.0102	26574	chr17	35306175	35414171	2141	+	NM_012138	protein_coding	CHE-1|CHE1|DED	P3457	apoptosis antagonizing transcription factor	AATF
38	AATK	1.06112	1.11002	1.04609	0.0243856	0.0556649	0.348815	0.0602998	0.145885	0.210891	0.0588339	0.0151167	0.0729176	0.0931968	0.113105	0.140302	0.211293	0.116659	0.257797	0.340417	0.161475	0.0695743	0.040828	0.0101226	0.0518531	0.0672622	0.0813558	0.101656	0.15885	0.0841512	0.197253	0.264899	0.119185	0.0499334	9625	chr17	79091096	79139872	5358	-	NM_004920	protein_coding	AATYK|AATYK1|KIAA0641|LMR1|LMTK1|p35BP	P2424	apoptosis-associated tyrosine kinase	AATK
39	AATK-AS1	1	1	1	1	1	1	0	0	0	0	0	0	0	0	0	0	0	0	0	0	0	0	0	0	0	0	0	0	0	0	0	0	0	388428	chr17	79139307	79156964	1577	+	NR_027255	lncRNA	.	.	AATK antisense RNA 1	AATK-AS1
40	ABALON	1.30803	1.38292	1.05726	0.00109575	0.00233058	0.35231	6.34512	6.73251	6.81284	6.2219	6.41656	6.27338	6.45562	6.83167	6.65722	6.75085	6.68396	6.86069	6.59989	6.84973	6.92066	73.0162	83.7167	76.3609	87.1403	112.746	99.6307	107.278	101.769	115.999	95.5797	114.83	120.743	103021294	chr20	30309310	30311212	1903	+	NR_131907	lncRNA	.	.	apoptotic BCL2L1-antisense long non-coding RNA	ABALON
41	ABAT	0.998982	0.99975	1.00077	0.953137	0.990291	0.967068	0.0570738	0.0556039	0.0567127	0.0159405	0.0466768	0.107004	0.0571819	0.0308804	0.0343735	0.0627535	0.0935218	0.062454	0.103478	0.0590397	0	0.0108198	0.0323219	0.0770015	0.0407603	0.0215618	0.0239443	0.0449062	0.0669192	0.0448016	0.0738618	0.0421148	0	18	chr16	8768444	8878432	5930	+	NM_020686	protein_coding	FLJ17813|FLJ30272|GABA-AT|GABAT|NPD009	P14995	4-aminobutyrate aminotransferase	ABAT
42	ABCA1	0.765048	0.810677	1.05964	0.00275534	0.00323918	0.333011	1.35072	0.96434	1.04792	1.46439	1.37362	1.30125	1.25487	1.07744	0.895729	0.79616	1.06859	0.975915	1.01827	1.02174	1.16827	1.74633	1.57882	1.46458	1.39235	1.10855	0.857316	0.741904	1.09678	0.974711	1.02036	1.03549	1.25395	19	chr9	107543284	107690527	10502	-	NM_005502	protein_coding	ABC-1|ABC1|CERP|FLJ14958|HDLDT1|MGC164864|MGC165011|TGD	P18452	ATP binding cassette subfamily A member 1	ABCA1
43	ABCA10	0.998905	1.00826	1.00936	0.971896	0.817473	0.794104	0.150464	0.148884	0.16233	0.114616	0.157042	0.230991	0.0954246	0.112743	0.183581	0.0819075	0.213437	0.15203	0.23754	0.197768	0.0556622	0.0814895	0.113555	0.173664	0.0689308	0.0810807	0.135122	0.059065	0.159344	0.112302	0.177998	0.147795	0.0398148	10349	chr17	67144148	67240956	6331	-	NM_080282	protein_coding	EST698739	P12881	ATP binding cassette subfamily A member 10	ABCA10
44	ABCA11P	0.968459	0.959456	0.990704	0.461225	0.534059	0.887297	2.71381	2.66758	2.6541	2.74222	2.5836	2.75662	2.76526	2.54045	2.69917	2.69525	2.7281	2.46138	2.83407	2.7192	2.57408	5.64395	4.95115	5.75871	5.82309	4.81052	5.47761	5.50684	5.62307	4.54098	6.10496	5.60935	4.98081	79963	chr4	419224	467998	1895	-	NR_002451	misc_RNA	ABCA11|EST1133530|FLJ14297|FLJ57767|MGC120309|MGC120310|MGC120312|MGC132744|MGC138274	.	ATP binding cassette subfamily A member 11, pseudogene	ABCA11P
45	ABCA12	1.00566	0.996007	0.9904	0.447822	0.371071	0.180613	0.00886485	0.0170092	0.00309243	2.01353e-05	0.0184343	0	0.0168965	0.00909599	0.0400744	0.0185576	1.18567e-06	0.0123197	1.05491e-05	0	0	0	0.0126146	0	0.0118986	0.0063	0.0280088	0.0131087	0	0.00872632	0	0	0	26154	chr2	215796266	216003151	9180	-	NM_015657	protein_coding	DKFZp434G232|FLJ41584|ICR2B|LI2	P11022	ATP binding cassette subfamily A member 12	ABCA12
46	ABCA13	0.997735	1.0099	1.01219	0.829103	0.452908	0.387732	0.0409756	0.0377038	0.0551883	0.0550068	0.0547515	0.0381588	0.0156267	0.0168306	0.0690058	0.0342287	0.0302344	0.0565284	0.0960124	0.0269033	0.040374	0.0382573	0.0380772	0.0268086	0.0110289	0.0116864	0.0487377	0.0243008	0.0211539	0.0404698	0.0683521	0.0190211	0.0286773	154664	chr7	48211057	48687091	17114	+	NM_152701	protein_coding	.	P20458	ATP binding cassette subfamily A member 13	ABCA13
47	ABCA17P	0.994061	1.01134	1.01738	0.495531	0.333539	0.0991131	0.0182252	0.00963215	0.0344947	4.36695e-05	0.03612	0.0362834	0	7.40682e-06	0.0199991	0.0183914	2.5715e-06	0.048448	2.28789e-05	0.0457869	0.0431744	0	0.024932	0.025474	0	0	0.0138582	0.0130021	0	0.0345799	0	0.0325067	0.030666	650655	chr16	2390923	2476700	4188	+	NR_003574	misc_RNA	ABCA17|FLJ37881	.	ATP binding cassette subfamily A member 17, pseudogene	ABCA17P
48	ABCA2	1.00767	1.04603	1.03807	0.834388	0.314372	0.227959	2.78207	2.7931	2.847	2.90176	2.77524	2.67101	2.77096	2.80586	2.82907	2.74667	2.78953	2.84351	2.93567	2.76141	2.84214	6.4204	5.7964	5.36936	5.85096	5.98418	6.0877	5.74384	5.91111	6.22005	6.62282	5.80636	6.20169	20	chr9	139901686	139923374	8360	-	NM_212533	protein_coding	ABC2|MGC129761	P24941	ATP binding cassette subfamily A member 2	ABCA2
49	ABCA3	0.983077	1.00653	1.02386	0.695307	0.901258	0.487556	3.03488	3.01026	3.04427	3.11481	2.93617	2.92701	3.14753	2.98981	2.98652	3.03839	3.02562	3.07015	3.08718	2.90872	3.10276	7.59981	6.59663	6.60604	7.89411	6.93366	6.90428	7.25547	7.13978	7.44925	7.46587	6.53906	7.62817	21	chr16	2325879	2390747	6623	-	NM_001089	protein_coding	ABC-C|ABC3|EST111653|LBM180|MGC166979|MGC72201|SMDP3	P34469	ATP binding cassette subfamily A member 3	ABCA3
50	ABCA4	0.978572	0.996435	1.01825	0.0403776	0.807068	0.290962	0.0491782	0.017928	0.044026	0.0405902	0.0600607	0.0404636	0.0554915	0.0495818	0.0112473	0	0.0103868	0	0.0412181	0.0384334	0.0948674	0.0280509	0.0418803	0.0284504	0.0395192	0.0348708	0.00775004	0	0.0072137	0	0.028726	0.0272417	0.0684852	24	chr1	94458394	94586705	7325	-	NM_000350	protein_coding	ABC10|ABCR|ARMD2|CORD3|DKFZp781N1972|FFM|FLJ17534|RMP|RP19|STGD|STGD1	P24515	ATP binding cassette subfamily A member 4	ABCA4
51	ABCA5	1.0191	1.02006	1.00094	0.549956	0.758149	0.987106	1.26693	1.29422	1.29557	1.37421	1.22215	1.19504	1.26977	1.29972	1.27	1.26761	1.3384	1.34489	1.48367	1.16641	1.16205	1.57889	1.32084	1.28966	1.41764	1.45964	1.40708	1.41585	1.52794	1.55093	1.7891	1.25064	1.24477	23461	chr17	67240576	67323323	8177	-	NM_018672	protein_coding	ABC13|DKFZp451F117|DKFZp779N2435|EST90625|FLJ16381	P5909	ATP binding cassette subfamily A member 5	ABCA5
52	ABCA6	0.983733	0.990716	1.0071	0.12451	0.356155	0.146958	0.0275973	0.00393588	0.0141404	3.18701e-05	0.0143105	0.0563306	0.0390598	5.4055e-06	0.0156723	0	1.87668e-06	0.0190666	0.0193709	0.0180318	0	0	0.00975736	0.0398249	0.0276677	0	0.0108405	0	0	0.0135185	0.0133793	0.0127079	0	23460	chr17	67074847	67138015	5296	-	NM_080284	protein_coding	EST155051|FLJ43498	P34581	ATP binding cassette subfamily A member 6	ABCA6
53	ABCA7	0.937544	1.01635	1.08406	0.366266	0.76624	0.182633	1.14633	1.05329	1.16973	1.09948	1.31746	1.01332	1.13777	0.922362	1.08533	0.961411	1.22449	1.17635	1.06895	1.17357	1.25408	1.13245	1.48036	1.01868	1.20583	0.893672	1.11816	0.953365	1.33606	1.26901	1.09261	1.26136	1.39203	10347	chr19	1040102	1065570	6818	+	NM_019112	protein_coding	ABCA-SSN|ABCX|FLJ40025	P22731	ATP binding cassette subfamily A member 7	ABCA7
54	ABCA8	0.998021	0.994141	0.996113	0.80421	0.435044	0.493571	0.0129666	0.0101087	0.00448962	1.89785e-05	0.0383296	0.0131774	0	0.0258156	0.014455	0	1.11755e-06	0	0.0178753	0	0	0	0.0265037	0.00917815	0	0.0180016	0.00999575	0	0	0	0.0123417	0	0	10351	chr17	66863428	66951533	5989	-	NM_001288985	protein_coding	KIAA0822|MGC163152	P2145	ATP binding cassette subfamily A member 8	ABCA8
55	ABCA9	0.993491	0.984801	0.991254	0.607035	0.114823	0.449385	0.0376721	0.0282504	0.0155766	0.0472258	0.058464	0.0119363	0.0326431	9.63756e-06	0.064187	0.0358439	0.0121253	0.0317419	0.0162259	0	0.0141632	0.032756	0.0407547	0.00831051	0.0230904	0	0.0452624	0.0254386	0.00842789	0.0225711	0.0111795	0	0.0100028	10350	chr17	66970773	67057136	6301	-	NM_080283	protein_coding	DKFZp686F2450|EST640918|MGC75415	P2189	ATP binding cassette subfamily A member 9	ABCA9
56	ABCA9-AS1	1	1	1	1	1	1	0	0	0	0	0	0	0	0	0	0	0	0	0	0	0	0	0	0	0	0	0	0	0	0	0	0	0	104355297	chr17	67000855	67014464	523	+	NR_126414	lncRNA	.	.	ABCA9 antisense RNA 1	ABCA9-AS1
57	ABCB1	0.997186	0.995159	0.997968	0.763809	0.612678	0.685251	0.0121183	0.00805231	0.00511794	1.76158e-05	1.75618e-05	0.0478403	0	0.0158627	6.37112e-06	0.0162498	1.03731e-06	0	9.22908e-06	0.0203546	0	0	0	0.0337226	0	0.0110188	0	0.0114732	0	0	0	0.014346	0	5243	chr7	87133179	87342639	4716	-	NM_000927	protein_coding	ABC20|CD243|CLCS|GP170|MDR1|MGC163296|P-GP|PGY1	P35710	ATP-binding cassette, sub-family B (MDR/TAP), member 1	ABCB1
58	ABCB10	1.04679	1.06486	1.01726	0.211984	0.05133	0.586612	3.58984	3.65582	3.68051	3.65477	3.62326	3.53801	3.53968	3.67162	3.64294	3.56332	3.73987	3.65488	3.66173	3.65523	3.74802	11.4983	11.2281	10.6169	10.6757	11.7263	11.4573	10.8818	12.3542	11.6756	11.605	11.6494	12.4969	23456	chr1	229652329	229694442	3857	-	NM_012089	protein_coding	EST20237|M-ABC2|MTABC2	P16927	ATP binding cassette subfamily B member 10	ABCB10
59	ABCB11	1.00279	1.00371	1.00091	0.356138	0.356096	0.850344	3.28965e-06	0.00402939	0.00534564	6.5894e-06	6.56918e-06	0	0	1.11763e-06	2.38319e-06	0.0160466	3.88017e-07	0.0212613	3.45224e-06	0	0	0	0	0	0	0	0	0.0113242	0	0.0150635	0	0	0	8647	chr2	169779449	169887833	4711	-	NM_003742	protein_coding	ABC16|BRIC2|BSEP|PFIC-2|PFIC2|PGY4|SPGP	P31799	ATP binding cassette subfamily B member 11	ABCB11
60	ABCB4	1.00353	1.00443	1.00089	0.356131	0.3561	0.879578	4.01235e-06	0.00509145	0.00637884	8.03702e-06	8.01236e-06	0	0	1.36316e-06	2.90675e-06	0.0202542	4.73261e-07	0	4.21067e-06	0.0253437	0	0	0	0	0	0	0	0.0143057	0	0	0	0.0178801	0	5244	chr7	87031361	87105019	3967	-	NM_018849	protein_coding	ABC21|GBD1|MDR2|MDR2/3|MDR3|PFIC-3|PGY3	P32530	ATP-binding cassette, sub-family B (MDR/TAP), member 4	ABCB4
61	ABCB5	1.01358	1.01426	1.00067	0.213994	0.4305	0.972802	0.0035287	0.0229851	0.0239557	3.52478e-05	0.0140284	0	0	5.97839e-06	0.0387271	0	0.0524539	0.0935073	1.84667e-05	0	0	0	0.0095605	0	0	0	0.0270489	0	0.0369953	0.0676356	0	0	0	340273	chr7	20655245	20796637	7842	+	NM_001163941	protein_coding	ABCB5alpha|ABCB5beta|EST422562	P19887	ATP binding cassette subfamily B member 5	ABCB5
62	ABCB6	1.04387	1.06123	1.01662	0.345676	0.134569	0.62484	2.2407	2.30264	2.32643	2.35799	2.16016	2.18279	2.25353	2.29263	2.29228	2.2118	2.40713	2.31966	2.37073	2.26541	2.34779	4.0924	3.43894	3.54071	3.78504	3.89387	3.88633	3.65334	4.3021	4.01977	4.15399	3.82492	4.11087	10058	chr2	220074488	220083712	3018	-	NM_005689	protein_coding	ABC|ABC14|EST45597|FLJ22414|MTABC3|PRP|umat	P21607	ATP binding cassette subfamily B member 6 (Langereis blood group)	ABCB6
63	ABCB7	0.990756	0.971839	0.980907	0.839457	0.378927	0.65117	3.34882	3.33542	3.30761	3.29019	3.42998	3.28728	3.38263	3.46804	3.3458	3.29684	3.21964	3.23183	3.32777	3.33494	3.33331	8.70819	9.69802	8.76364	9.46967	10.052	9.13916	8.87662	8.31132	8.45398	9.00087	9.13029	9.12485	22	chrX	74273007	74376175	2525	-	NM_001271696	protein_coding	ABC7|ASAT|Atm1p|EST140535	P34559	ATP binding cassette subfamily B member 7	ABCB7
64	ABCB8	1.02709	1.00892	0.98231	0.595182	0.83584	0.691379	2.64131	2.67987	2.65412	2.747	2.64965	2.51554	2.64375	2.65176	2.81728	2.65041	2.58997	2.57524	2.60879	2.72521	2.70185	5.66632	5.2307	4.71864	5.27227	5.27677	6.03073	5.30776	5.01832	4.99508	5.07704	5.63676	5.53389	11194	chr7	150725509	150744869	4660	+	NM_001282292	protein_coding	EST328128|M-ABC1|MABC1	P3280	ATP binding cassette subfamily B member 8	ABCB8
65	ABCB9	1.08998	1.17817	1.0809	0.124629	0.0397659	0.201092	1.9382	2.06251	2.17475	2.03858	1.989	1.75743	1.95237	2.1219	2.12854	2.02225	1.97117	2.34539	2.12798	2.17316	2.0346	3.0817	2.94368	2.38125	2.88317	3.34794	3.36261	3.07959	2.91933	4.10789	3.35635	3.5251	3.11312	23457	chr12	123405498	123451056	3909	-	NM_001243014	protein_coding	EST122234|KIAA1520|TAPL|hABCB9	P7219	ATP binding cassette subfamily B member 9	ABCB9
66	ABCC1	0.907209	0.928248	1.02319	0.016346	0.0147072	0.417485	4.30574	4.16525	4.19832	4.30072	4.28852	4.25426	4.37667	4.19347	4.23488	4.07274	4.15499	4.15944	4.23661	4.18142	4.21461	18.5543	18.3899	18.0855	19.8557	17.2715	17.7752	15.9165	16.8062	16.9869	17.7737	17.2192	17.6543	4363	chr16	16043434	16236930	6563	+	NM_004996	protein_coding	ABC29|ABCC|DKFZp686N04233|DKFZp781G125|GS-X|MRP|MRP1	P13896	ATP binding cassette subfamily C member 1	ABCC1
67	ABCC10	1.01253	1.05422	1.04117	0.74437	0.144305	0.0797261	3.27434	3.29231	3.35052	3.37355	3.31677	3.16636	3.23202	3.29187	3.36514	3.2628	3.24656	3.37127	3.33677	3.35997	3.33373	9.28721	8.8897	7.97865	8.43247	8.78123	9.27628	8.64631	8.48672	9.41144	9.06374	9.30724	9.12751	89845	chr6	43395292	43418163	6793	+	NM_001198934	protein_coding	EST182763|MRP7|SIMRP7	P12541	ATP binding cassette subfamily C member 10	ABCC10
68	ABCC11	0.997036	1.00904	1.01204	0.355629	0.314425	0.16925	0.00428505	2.20303e-06	0.0172667	1.49316e-05	0.0170496	0	0	2.53255e-06	5.40032e-06	0	8.79251e-07	0.0228082	0.0457589	0	0	0	0.0116604	0	0	0	0	0	0	0.0161692	0.0319758	0	0	85320	chr16	48200822	48269088	4576	-	NM_032583	protein_coding	EWWD|MRP8|WW	P33374	ATP binding cassette subfamily C member 11	ABCC11
69	ABCC12	0.994914	0.998312	1.00342	0.355823	0.791794	0.355897	0.00735819	1.25181e-06	0.00492058	0.029202	8.45847e-06	0	0	1.43905e-06	3.06859e-06	0	4.99611e-07	0.019578	4.4451e-06	0	0	0.0201102	0	0	0	0	0	0	0	0.0138679	0	0	0	94160	chr16	48116884	48180681	5168	-	NM_033226	protein_coding	MGC27071|MRP9	P16985	ATP binding cassette subfamily C member 12	ABCC12
70	ABCC13	1.00966	1.01305	1.00335	0.134187	0.356186	0.819651	1.13038e-05	0.0138864	0.0187106	2.26422e-05	2.25727e-05	0	0	0.0272571	8.18901e-06	0.0280141	1.33329e-06	0	0.0734289	0	0	0	0	0	0	0.0190167	0	0.0198292	0	0	0.0518578	0	0	150000	chr21	15646120	15673692	2924	+	NR_003088	misc_RNA	C21orf73|PRED6	.	ATP binding cassette subfamily C member 13 (pseudogene)	ABCC13
71	ABCC2	0.952728	0.944292	0.991146	0.440614	0.339297	0.881656	0.619924	0.55006	0.537229	0.766302	0.516974	0.642303	0.540526	0.503735	0.717492	0.527203	0.43643	0.502426	0.477303	0.690974	0.466367	0.695154	0.426534	0.560883	0.456835	0.417139	0.642333	0.444082	0.353016	0.420183	0.389927	0.617168	0.384126	1244	chr10	101542355	101611949	5446	+	NM_000392	protein_coding	ABC30|CMOAT|DJS|KIAA1010|MRP2|cMRP	P25892	ATP binding cassette subfamily C member 2	ABCC2
72	ABCC3	0.922522	0.981338	1.06376	0.220842	0.845031	0.567517	1.77273	1.65638	1.74555	1.65355	1.77012	1.88387	1.77418	1.51929	1.71347	1.54686	1.82424	1.7199	2.03536	1.74279	1.41829	2.12702	2.39053	2.69092	2.43088	1.86351	2.27235	1.9336	2.53997	2.31046	3.0869	2.3573	1.68269	8714	chr17	48712218	48769063	5166	+	NM_001144070	protein_coding	ABC31|DKFZp686E22157|EST90757|MLP2|MOAT-D|MRP3|cMOAT2	P6385	ATP binding cassette subfamily C member 3	ABCC3
73	ABCC4	1.05454	1.09975	1.04287	0.0857357	0.00563967	0.158438	3.5751	3.65171	3.71227	3.61984	3.56909	3.59462	3.51476	3.66129	3.62646	3.58872	3.72677	3.68194	3.73458	3.76614	3.66411	11.1987	10.7766	11.0818	10.476	11.6355	11.3157	11.0927	12.2335	11.9153	12.2584	12.6594	11.7351	10257	chr13	95672083	95953700	6265	-	NM_001301829	protein_coding	EST170205|MOAT-B|MOATB|MRP4	P17278	ATP binding cassette subfamily C member 4	ABCC4
74	ABCC5	0.967883	0.935317	0.966353	0.433595	0.151108	0.471825	3.31984	3.27275	3.22337	3.33314	3.41059	3.24957	3.28088	3.16086	3.37283	3.29154	3.25777	3.13191	3.2822	3.32085	3.14922	9.00316	9.5561	8.51176	8.75677	7.93203	9.33144	8.83977	8.56079	7.82155	8.69012	9.03143	7.91265	10057	chr3	183637724	183735727	7060	-	NM_005688	protein_coding	ABC33|DKFZp686C1782|EST277145|MOAT-C|MOATC|MRP5|SMRP|pABC11	P33349	ATP binding cassette subfamily C member 5	ABCC5
75	ABCC5-AS1	0.955902	0.955902	0.999999	0.355861	0.355856	0.917454	0.0650717	6.73294e-06	5.97706e-06	0.244298	4.54939e-05	0	0	7.74001e-06	1.65045e-05	0	2.68718e-06	0	2.39081e-05	0	0	0.182898	0	0	0	0	0	0	0	0	0	0	0	100873982	chr3	183724126	183729207	469	+	NR_046570	lncRNA	.	.	ABCC5 antisense RNA 1	ABCC5-AS1
76	ABCC6	1.12483	1.07016	0.951392	0.336005	0.275074	0.641753	0.231242	0.400954	0.329066	0.282745	0.400244	0.153094	0.0665264	0.297259	0.0640066	0.720435	0.443259	0.218061	0.364464	0.328913	0.398524	0.214006	0.316647	0.111974	0.0478006	0.22837	0.044943	0.6507	0.359478	0.164945	0.285874	0.257497	0.320011	368	chr16	16243422	16317328	5762	-	NM_001171	protein_coding	ABC34|ARA|EST349056|MLP1|MOATE|MRP6|PXE|PXE1|URG7	P4794	ATP binding cassette subfamily C member 6	ABCC6
77	ABCC6P1	1	1	1	1	1	1	0	0	0	0	0	0	0	0	0	0	0	0	0	0	0	0	0	0	0	0	0	0	0	0	0	0	0	653190	chr16	18582570	18609607	2724	+	NR_003569	misc_RNA	.	.	ATP binding cassette subfamily C member 6 pseudogene 1	ABCC6P1
78	ABCC6P2	1.10534	1.21464	1.09888	0.427338	0.169787	0.553798	0.102539	0.247034	0.383065	0.000557457	0.26011	0	0.133153	9.45592e-05	0.289568	0	0.608543	0.639536	0.180143	0.609388	0	0	0.19537	0	0.0974555	0	0.221421	0	0.524492	0.561103	0.132065	0.527617	0	730013	chr16	14916289	14918559	706	-	NR_023387	misc_RNA	.	.	ATP binding cassette subfamily C member 6 pseudogene 2	ABCC6P2
79	ABCC8	1	1	1	1	1	1	0	0	0	0	0	0	0	0	0	0	0	0	0	0	0	0	0	0	0	0	0	0	0	0	0	0	0	6833	chr11	17414432	17498392	4921	-	NM_001287174	protein_coding	ABC36|HHF1|HI|HRINS|MRP8|PHHI|SUR|SUR1|TNDM2	P19463	ATP binding cassette subfamily C member 8	ABCC8
80	ABCC9	0.989556	1.04975	1.06083	0.861252	0.4749	0.492384	1.76885	1.75371	1.8389	1.82762	1.7481	1.79714	1.69927	1.5892	1.94706	1.67264	1.78084	1.70936	2.07201	1.75942	1.78618	2.52798	2.33863	2.47558	2.25762	2.00563	2.84757	2.20096	2.43503	2.28678	3.19182	2.39645	2.46164	10060	chr12	21950324	22089628	8462	-	NM_020297	protein_coding	ABC37|CMD1O|FLJ36852|SUR2	P29560	ATP binding cassette subfamily C member 9	ABCC9
81	ABCD1	0.899982	0.96072	1.06749	0.017662	0.392903	0.202055	2.3238	2.17177	2.26599	2.39061	2.36115	2.25435	2.28486	2.2594	2.16678	2.09159	2.16437	2.19521	2.26653	2.1772	2.41288	4.20944	4.10408	3.77159	3.88982	3.78248	3.47912	3.28149	3.48092	3.60514	3.79476	3.53882	4.34625	215	chrX	152990323	153010216	3664	+	NM_000033	protein_coding	ABC42|ALD|ALDP|AMN	P28427	ATP binding cassette subfamily D member 1	ABCD1
82	ABCD2	0.999998	1.00668	1.00668	0.284072	0.356071	0.355963	3.30676e-06	9.77264e-07	0.00961235	6.62367e-06	6.60334e-06	0	0	1.12344e-06	2.39558e-06	0	3.90035e-07	0	0.038071	0	0	0	0	0	0	0	0	0	0	0	0.0265249	0	0	225	chr12	39945022	40013843	5341	-	NM_005164	protein_coding	ABC39|ALDL1|ALDR|ALDRP|hALDR	P8318	ATP-binding cassette, sub-family D (ALD), member 2	ABCD2
83	ABCD3	1.0065	0.960896	0.954693	0.870569	0.358764	0.395596	4.66825	4.6776	4.61071	4.71626	4.61113	4.64941	4.69393	4.81249	4.62897	4.59024	4.66876	4.59417	4.74256	4.61344	4.48064	25.0782	23.2437	24.099	24.9884	27.0624	23.6715	23.2154	24.4233	23.3139	25.6593	23.5812	21.4352	5825	chr1	94883933	94984219	3797	+	NM_002858	protein_coding	ABC43|PMP70|PXMP1|ZWS2	P25608	ATP binding cassette subfamily D member 3	ABCD3
84	ABCD4	1.01553	0.981195	0.96619	0.744294	0.617102	0.438523	3.84857	3.8708	3.82118	3.87486	3.89556	3.72054	3.89598	3.8633	3.91883	3.72687	3.96338	3.82631	3.80316	3.75001	3.90113	13.5572	13.7683	12.1837	13.9458	13.5344	14.0826	12.3092	14.592	13.2763	12.9021	12.5098	14.0094	5826	chr14	74751980	74769767	3157	-	NR_003256	protein_coding	ABC41|EST352188|P70R|P79R|PMP69|PXMP1L	.	ATP binding cassette subfamily D member 4	ABCD4
85	ABCE1	0.996384	0.961449	0.964938	0.895152	0.340914	0.374007	6.34441	6.33918	6.28769	6.40568	6.31016	6.37436	6.28416	6.34781	6.28403	6.31796	6.40422	6.15723	6.39152	6.29885	6.29356	83.0895	77.701	81.9694	77.2605	80.3346	76.6943	79.2104	83.6551	70.8558	82.5937	78.0681	77.8291	6059	chr4	146019156	146050676	4321	+	NM_002940	protein_coding	ABC38|OABP|RLI|RNASEL1|RNASELI|RNS4I	P5308	ATP binding cassette subfamily E member 1	ABCE1
86	ABCF1	1.03873	1.00038	0.963073	0.200687	0.994057	0.434068	6.46266	6.51748	6.4632	6.36308	6.49447	6.49456	6.49411	6.539	6.52358	6.55055	6.45492	6.56254	6.26959	6.50388	6.49981	80.6358	88.4258	89.1781	89.5193	91.8602	90.728	93.2415	86.6826	94.1568	75.8145	90.1426	89.9437	23	chr6	30539170	30559309	3464	+	NM_001090_5	protein_coding	ABC27|ABC50	P7377	ATP binding cassette subfamily F member 1	ABCF1
87	ABCF2	0.964723	0.960944	0.996082	0.28456	0.277863	0.903692	5.61143	5.55962	5.55396	5.55308	5.62396	5.56588	5.69821	5.61001	5.47712	5.56228	5.58562	5.57955	5.44879	5.57403	5.60831	45.5685	47.9169	46.3741	51.1341	47.7733	43.4107	46.5043	46.999	47.1409	42.4886	46.8402	48.0209	10061	chr7	150904923	150924460	5101	-	NM_005692	protein_coding	ABC28|DKFZp586K1823|EST133090|HUSSY18|M-ABC1	P32546	ATP binding cassette subfamily F member 2	ABCF2
88	ABCF3	1.00058	1.01161	1.01102	0.982846	0.742484	0.776239	4.91258	4.91342	4.92923	4.9334	4.92307	4.84837	4.94355	4.9453	4.90548	4.97079	4.8281	5.03535	4.84023	4.88063	4.95302	29.3109	29.0952	27.8104	29.8984	29.7674	28.8833	30.5236	27.3919	32.0087	27.5236	28.5832	30.124	55324	chr3	183903863	183911795	2572	+	NM_018358	protein_coding	EST201864|FLJ11198	P5000	ATP binding cassette subfamily F member 3	ABCF3
89	ABCG1	1.05985	1.00216	0.945565	0.342904	0.97473	0.342642	0.543272	0.627132	0.54638	0.537139	0.702868	0.54723	0.366241	0.659409	0.716804	0.626053	0.497388	0.456449	0.62785	0.408702	0.675142	0.446543	0.622328	0.461336	0.290845	0.578553	0.641546	0.546637	0.4114	0.375555	0.542623	0.329507	0.599925	9619	chr21	43619799	43717354	3607	+	NM_207627	protein_coding	ABC8|MGC34313|WHITE1	P915	ATP binding cassette subfamily G member 1	ABCG1
90	ABCG2	0.950922	0.902478	0.949056	0.338132	0.0208379	0.35063	0.997575	0.924974	0.84954	0.902882	1.02225	1.03987	1.02122	0.801072	0.919221	1.09303	0.870178	0.942513	0.803076	0.866312	0.780744	0.861765	1.02231	1.05616	1.03414	0.741139	0.888148	1.13931	0.827427	0.928704	0.740933	0.827074	0.722384	9429	chr4	89011416	89152474	4750	-	NM_001257386	protein_coding	ABC15|ABCP|BCRP|BCRP1|BMDP|CD338|CDw338|EST157481|MGC102821|MRX|MXR|MXR1	P28094	ATP-binding cassette, sub-family G (WHITE), member 2 (Junior blood group)	ABCG2
91	ABCG4	0.982319	0.993587	1.01147	0.461628	0.815568	0.750463	0.118874	0.0931376	0.109592	0.122999	0.122457	0.0974661	0.132342	0.140725	0.0910937	0.136329	1.35418e-05	0	0.130048	0.179308	0.123031	0.0878354	0.0874336	0.0699054	0.0966938	0.102244	0.0648288	0.0999188	0	0	0.0936996	0.133111	0.0897179	64137	chr11	119019750	119033374	3935	+	NM_022169	protein_coding	WHITE2	P20562	ATP binding cassette subfamily G member 4	ABCG4
92	ABCG5	1.00548	0.999999	0.994552	0.356048	0.288923	0.355935	2.71565e-06	0.00788131	7.12468e-07	5.43963e-06	5.42294e-06	0	0	9.22614e-07	0.0312689	0	3.20313e-07	0	2.84987e-06	0	0	0	0	0	0	0	0.0217828	0	0	0	0	0	0	64240	chr2	44039611	44065958	2740	-	NM_022436	protein_coding	STSL	P28908	ATP binding cassette subfamily G member 5	ABCG5
93	ABCG8	1	1	1	1	1	1	0	0	0	0	0	0	0	0	0	0	0	0	0	0	0	0	0	0	0	0	0	0	0	0	0	0	0	64241	chr2	44066103	44105605	2665	+	NM_022437	protein_coding	GBD4|MGC142217|STSL	P6033	ATP binding cassette subfamily G member 8	ABCG8
94	ABHD1	0.92045	0.946489	1.02829	0.167392	0.452485	0.59061	0.148965	0.0293764	0.0696221	0.312725	0.0572923	0	0.204807	0.0572239	6.42918e-05	0.059037	1.04677e-05	0	9.31314e-05	0	0.260269	0.239982	0.0398256	0	0.153329	0.0403449	0	0.0422313	0	0	0	0	0.198799	84696	chr2	27346657	27353680	1446	+	NM_032604	protein_coding	FLJ36128|LABH1	P12748	abhydrolase domain containing 1	ABHD1
95	ABHD10	0.93657	0.910417	0.972076	0.0612746	0.000741669	0.330967	3.90777	3.81323	3.77237	3.89614	3.94931	3.92419	3.85991	3.89468	3.73116	3.77004	3.85125	3.75813	3.7754	3.76205	3.79363	13.7742	14.3301	14.1824	13.5769	13.8542	12.2419	12.7128	13.4259	12.6179	12.6371	12.6228	12.9325	55347	chr3	111697723	111712215	2806	+	NR_073571	protein_coding	FLJ11342	.	abhydrolase domain containing 10	ABHD10
96	ABHD11	1.06301	1.02739	0.966491	0.331947	0.548536	0.519281	3.38297	3.47113	3.42196	3.45648	3.23806	3.47166	3.35365	3.48554	3.29551	3.47624	3.60997	3.50987	3.41	3.39617	3.36776	9.89464	8.36163	10.0947	9.26247	10.1866	8.791	10.184	11.2045	10.4617	9.58709	9.57003	9.37033	83451	chr7	73150425	73153184	2174	-	NM_001301058	protein_coding	WBSCR21	P7590	abhydrolase domain containing 11	ABHD11
97	ABHD11-AS1	1.06153	1.23312	1.16165	0.713045	0.474917	0.546608	0.239967	0.326107	0.542278	0.000873762	0.785138	0	0	0.255151	0.273151	0.49841	0.262967	1.21778	0.000457811	0.583883	0	0	0.718169	0	0	0.193039	0.207509	0.415104	0.199795	1.33187	0	0.501039	0	171022	chr7	73149399	73150330	473	+	NR_026690	lncRNA	.	.	ABHD11 antisense RNA 1 (tail to tail)	ABHD11-AS1
98	ABHD12	1.07053	1.09419	1.02211	0.0439336	0.0240531	0.423363	5.01435	5.11268	5.14422	5.00133	5.10583	4.97807	4.96797	5.15561	5.09541	5.14021	5.05743	5.21338	5.07781	5.11943	5.16275	30.7689	33.159	30.5205	30.4282	34.596	33.0879	34.4524	32.2837	36.345	32.6301	33.9081	34.994	26090	chr20	25275379	25371618	2411	-	NM_015600	protein_coding	ABHD12A|BEM46L2|C20orf22|DKFZp434P106|dJ965G21.2	P4902	abhydrolase domain containing 12	ABHD12
99	ABHD12B	1.01695	0.9426	0.926893	0.602433	0.0950804	0.0454174	0.20814	0.232383	0.122858	0.161733	0.161073	0.215226	0.290611	0.211279	0.232082	0.166736	0.315376	0.0753898	0.14644	0.0713547	0.19456	0.117085	0.116582	0.160909	0.224292	0.157406	0.173832	0.123551	0.244198	0.0544737	0.106071	0.0512122	0.145412	145447	chr14	51338878	51371688	1708	+	NM_001206673	protein_coding	BEM46L3|C14orf29|MGC129926|MGC129927|c14_5314	P35588	abhydrolase domain containing 12B	ABHD12B
100	ABHD13	1.02468	0.923721	0.901475	0.434234	0.140103	0.0382188	2.30547	2.34064	2.191	2.26955	2.26423	2.26553	2.41661	2.36705	2.37326	2.30338	2.3176	2.0245	2.24242	2.29049	2.19291	3.7892	3.77166	3.80873	4.35712	4.15304	4.16867	3.9579	3.98306	3.09208	3.71508	3.90941	3.59105	84945	chr13	108870763	108886603	5302	+	NM_032859	protein_coding	BEM46L1|C13orf6|FLJ14906|MGC27058|RP11-153I24.2|bA153I24.2	P25834	abhydrolase domain containing 13	ABHD13
101	ABHD14A	1.02327	1.08761	1.06288	0.672029	0.134885	0.337824	3.86898	3.90216	3.99014	3.83014	3.98258	3.82922	3.82772	4.06801	3.78496	3.90149	3.83824	3.89196	3.89578	4.03838	4.1212	13.1106	14.6863	13.2152	13.2565	15.7506	12.7447	14.0208	13.2963	13.9414	13.8239	15.4971	16.4814	25864	chr3	52009042	52015216	1108	+	NM_015407	protein_coding	DKFZp564O243|DORZ1|FLJ60317|FLJ60467	P34527	abhydrolase domain containing 14A	ABHD14A
102	ABHD14A-ACY1	0.756421	0.756553	1.00017	0.355861	0.356103	0.204003	0.402785	4.69478e-05	0.000298803	1.19409	0.000317205	0	0	5.39696e-05	0.000115081	0	1.87373e-05	0	0.000526941	0	0.000668144	1.28196	0	0	0	0	0	0	0	0	0.000245225	0	0.000606439	100526760	chr3	52009042	52009220	179	+	NR_037192	protein_coding	.	.	ABHD14A-ACY1 readthrough	ABHD14A-ACY1
103	ABHD14B	0.957767	0.932272	0.973381	0.333013	0.111556	0.567657	3.55233	3.49007	3.45115	3.56592	3.4727	3.52862	3.63711	3.44884	3.48409	3.39783	3.62001	3.48219	3.54163	3.34041	3.43288	10.7534	10.0169	10.5415	11.4892	9.90529	10.1587	9.59391	11.2897	10.2453	10.5987	9.17032	9.84941	84836	chr3	52002526	52008646	2243	-	NM_032750	protein_coding	CIB|MGC15429	P35512	abhydrolase domain containing 14B	ABHD14B
104	ABHD15	1.11226	1.1796	1.06054	0.041057	0.00180306	0.097746	2.16993	2.32343	2.40822	2.18923	2.05256	2.16415	2.26571	2.30897	2.21395	2.36253	2.40145	2.38891	2.46147	2.38369	2.39744	3.5292	3.11926	3.48243	3.82567	3.9496	3.62792	4.16534	4.28125	4.26639	4.48879	4.23689	4.28973	116236	chr17	27887689	27894042	3355	-	NM_198147	protein_coding	.	P21758	abhydrolase domain containing 15	ABHD15
105	ABHD16A	1.00353	0.990347	0.986863	0.914078	0.750041	0.617406	4.40317	4.40825	4.38917	4.33434	4.44607	4.34989	4.47719	4.36528	4.35222	4.45131	4.46086	4.40499	4.32134	4.40419	4.424	19.0115	20.6258	19.3935	21.3621	19.5822	19.3654	20.9899	21.0115	20.3238	18.9079	20.2613	20.5683	7920	chr6	31654726	31671137	2481	-	NM_001177515	protein_coding	.	P17874	abhydrolase domain containing 16A	ABHD16A
106	ABHD16B	0.901089	0.970816	1.07738	0.202451	0.551947	0.31703	3.02937	2.87911	2.98664	2.98628	3.15502	2.90022	3.06365	2.68143	3.09578	2.76892	2.93503	3.09137	2.99295	2.94816	2.90752	6.86649	7.84455	6.46611	7.39165	5.40652	7.52698	5.84998	6.64442	7.57341	6.93055	6.74726	6.53662	140701	chr20	62492566	62494341	1776	+	NM_080622	protein_coding	.	P6030	abhydrolase domain containing 16B	ABHD16B
107	ABHD17A	1.04422	1.10913	1.06217	0.183395	0.0199502	0.0605255	5.71158	5.774	5.86101	5.75186	5.74428	5.59795	5.7465	5.80984	5.80181	5.76417	5.71836	5.90593	5.83483	5.78381	5.91545	52.4464	52.1676	47.439	52.9116	55.019	54.6206	53.6406	51.6245	59.3601	55.8334	54.3281	59.6504	81926	chr19	1876975	1885518	1716	-	NM_001130111	protein_coding	.	P9331	abhydrolase domain containing 17A	ABHD17A
108	ABHD17B	0.943779	0.941485	0.99757	0.0653835	0.30098	0.965817	3.17094	3.08746	3.08395	3.10685	3.2266	3.15028	3.19714	3.08071	3.13515	3.01507	3.11601	2.88479	3.08312	3.25084	3.09383	7.55101	8.29268	7.8791	8.20575	7.44959	7.76215	7.12412	7.66609	6.433	7.44129	8.55526	7.57581	51104	chr9	74477368	74526148	3468	-	NM_016014	protein_coding	.	P26485	abhydrolase domain containing 17B	ABHD17B
109	ABHD17C	0.975256	0.947009	0.971037	0.544022	0.165162	0.478177	4.31174	4.2756	4.23319	4.33428	4.20856	4.37803	4.32075	4.23744	4.401	4.23377	4.22249	4.14577	4.30787	4.26309	4.211	19.0138	17.3417	19.7951	19.064	17.8369	20.0673	17.9128	17.6592	16.8184	18.7244	18.2801	17.6085	58489	chr15	80987652	81047962	2360	+	NM_021214	protein_coding	.	P16535	abhydrolase domain containing 17C	ABHD17C
110	ABHD2	1.193	1.26037	1.05647	0.000206432	3.26225e-05	0.070362	4.15119	4.40579	4.48504	4.19067	4.12855	4.13141	4.15329	4.46189	4.3803	4.34325	4.43476	4.44738	4.53826	4.51288	4.43915	17.113	16.3489	16.5276	16.8677	21.0083	19.7663	19.4037	20.6169	20.9579	22.1412	21.923	20.7951	11057	chr15	89631381	89745591	9133	+	NM_007011	protein_coding	HS1-2|LABH2|MGC111112|MGC26249|PHPS1-2	P6412	abhydrolase domain containing 2	ABHD2
111	ABHD3	0.949206	0.971322	1.0233	0.104309	0.270844	0.398366	3.41549	3.34028	3.37351	3.47418	3.37409	3.44415	3.36662	3.28681	3.41983	3.3389	3.31208	3.36213	3.43598	3.35982	3.33408	10.0303	9.29001	9.8851	9.35466	8.74677	9.67309	9.169	8.92752	9.34685	9.78017	9.30681	9.13076	171586	chr18	19230858	19284766	2601	-	NM_001308257	protein_coding	LABH3|MGC11259	P33252	abhydrolase domain containing 3	ABHD3
112	ABHD4	0.990423	0.977182	0.986631	0.725327	0.701012	0.807749	3.47402	3.46013	3.44071	3.45148	3.41369	3.45399	3.57194	3.49131	3.42778	3.4488	3.47185	3.55342	3.4238	3.21666	3.54403	9.85632	9.57532	9.95968	10.9376	10.2313	9.73155	9.97392	10.0901	10.813	9.68865	8.33476	10.7169	63874	chr14	23067147	23081265	2509	+	NM_022060	protein_coding	ABH4|FLJ12816	P25083	abhydrolase domain containing 4	ABHD4
113	ABHD5	1.22165	1.22732	1.00464	0.000573217	0.000504602	0.88356	4.03145	4.32028	4.32697	4.0722	3.99998	4.08892	3.96092	4.25871	4.40399	4.29995	4.31456	4.28611	4.40404	4.34487	4.26891	15.6855	14.8699	16.0189	14.6377	18.117	20.1114	18.7989	18.8889	18.6356	20.0856	19.4032	18.3693	51099	chr3	43732375	43764217	5353	+	NM_016006	protein_coding	CDS|CGI58|IECN2|MGC8731|NCIE2	P30240	abhydrolase domain containing 5	ABHD5
114	ABHD6	0.950671	1.06599	1.1213	0.470426	0.246212	0.17881	2.41983	2.34685	2.51202	2.35303	2.45953	2.48686	2.37557	2.49939	2.21625	2.14604	2.49085	2.47893	2.34466	2.63877	2.56914	4.07333	4.46284	4.60606	4.20788	4.64792	3.63481	3.44716	4.61883	4.6062	4.06079	5.24961	4.9585	57406	chr3	58223259	58280461	2393	+	NM_020676	protein_coding	.	P6158	abhydrolase domain containing 6	ABHD6
115	ABHD8	1.09772	1.04958	0.95615	0.0436031	0.302554	0.262076	3.87154	4.00605	3.94136	3.91474	3.78964	3.80199	3.97167	3.96401	4.06137	4.05201	3.94304	3.98	3.90744	3.83545	4.03475	13.9638	12.7192	12.9494	14.7512	14.5852	15.6489	15.6711	14.3735	14.8806	13.944	13.3344	15.4659	79575	chr19	17402940	17414282	2090	-	NM_024527	protein_coding	FLJ11743|MGC14280|MGC2512	P22501	abhydrolase domain containing 8	ABHD8
116	ABI1	0.988571	0.980321	0.991655	0.517192	0.480411	0.76948	4.17459	4.15801	4.14592	4.17003	4.1859	4.20811	4.1333	4.15674	4.20907	4.1278	4.13705	4.09507	4.12512	4.24587	4.11267	16.8599	17.0582	17.4846	16.6198	16.8124	17.4427	16.5729	16.5863	16.2018	16.3772	18.05	16.3819	10006	chr10	27035525	27150016	3773	-	NM_001178119	protein_coding	ABI-1|E3B1|NAP1BP|SSH3BP|SSH3BP1	P20982	abl interactor 1	ABI1
117	ABI2	1.00346	0.948923	0.94565	0.912977	0.158602	0.0614611	3.48949	3.49447	3.41385	3.57437	3.43489	3.52666	3.41615	3.48319	3.55509	3.44964	3.48794	3.40135	3.44834	3.34005	3.46252	10.8232	9.73203	10.5258	9.71684	10.1682	10.7222	9.98038	10.2145	9.63291	9.87206	9.16749	10.074	10152	chr2	204192962	204296896	7328	+	NM_001282925	protein_coding	ABI-2|ABI2B|AIP-1|AblBP3|SSH3BP2|argBPIA|argBPIB	P31813	abl-interactor 2	ABI2
118	ABI3	0.951812	0.960625	1.00926	0.470499	0.60555	0.842344	0.519668	0.448417	0.461713	0.508163	0.337272	0.459035	0.743537	0.453433	0.493261	0.380261	0.464325	0.518023	0.283332	0.560973	0.469308	0.418148	0.260182	0.374671	0.676976	0.368648	0.40617	0.30383	0.379444	0.435404	0.215484	0.47754	0.386782	51225	chr17	47287589	47300587	2091	+	NM_016428	protein_coding	NESH|SSH3BP3	P16469	ABI family member 3	ABI3
119	ABI3BP	0.999642	0.959494	0.959838	0.992346	0.245559	0.186804	0.444455	0.443938	0.384801	0.5343	0.410568	0.477263	0.348971	0.343041	0.474386	0.470603	0.483164	0.346748	0.38379	0.445805	0.360857	0.444184	0.325786	0.392148	0.275246	0.267904	0.387967	0.388145	0.397582	0.274249	0.303037	0.363961	0.286097	25890	chr3	100468179	100712334	4473	-	NM_015429	protein_coding	FLJ41743|FLJ41754|NESHBP|TARSH	P15877	ABI family member 3 binding protein	ABI3BP
120	ABL1	0.936959	0.956775	1.02115	0.0303658	0.163245	0.521473	4.88177	4.78783	4.81802	4.90594	4.83861	4.85644	4.92439	4.82147	4.71549	4.77577	4.83555	4.77711	4.8049	4.76762	4.91743	28.7415	27.3845	27.9719	29.4896	27.2367	25.1953	26.539	27.5391	26.6016	26.8344	26.3544	29.3645	25	chr9	133589268	133763062	6152	+	NM_007313	protein_coding	ABL|JTK7|bcr/abl|c-ABL|p150|v-abl	P8439	ABL proto-oncogene 1, non-receptor tyrosine kinase	ABL1
121	ABL2	0.878808	0.868989	0.988827	1.29721e-05	6.69106e-05	0.490973	5.29328	5.1069	5.09069	5.27169	5.31458	5.28353	5.30294	5.12119	5.1161	5.07447	5.11535	5.03484	5.12351	5.09229	5.11054	37.3217	38.4802	37.9534	38.6385	33.7562	33.5797	32.8757	33.6471	32.0034	33.7119	33.259	33.7168	27	chr1	179068462	179198819	12340	-	NM_001168239	protein_coding	ABLL|ARG|FLJ22224|FLJ31718|FLJ41441	P9270	ABL proto-oncogene 2, non-receptor tyrosine kinase	ABL2
122	ABLIM1	0.953676	0.931542	0.976791	0.0548802	0.0911489	0.583359	4.30634	4.23791	4.20403	4.31122	4.30445	4.28261	4.32672	4.27706	4.20217	4.17753	4.29164	4.07733	4.33015	4.2056	4.19191	18.6966	18.6048	18.4643	19.1469	18.3617	17.3539	17.19	18.5754	15.9935	19.0319	17.5272	17.3638	3983	chr10	116190869	116444414	8303	-	NM_006720	protein_coding	ABLIM|DKFZp781D0148|FLJ14564|KIAA0059|LIMAB1|LIMATIN|MGC1224	P29880	actin binding LIM protein 1	ABLIM1
123	ABLIM2	1.02771	0.976273	0.949948	0.304877	0.381916	0.00322482	0.171085	0.21052	0.136441	0.137151	0.225365	0.228413	0.0885095	0.235991	0.189297	0.205007	0.211394	0.157216	0.106097	0.156031	0.125781	0.0983603	0.167223	0.171569	0.0638167	0.177391	0.139605	0.153842	0.157701	0.11636	0.0756939	0.114991	0.0918813	84448	chr4	7967037	8160559	5219	-	NM_032432	protein_coding	DKFZp761F129|FLJ26534|FLJ39684|KIAA1808|MGC141918	P24182	actin binding LIM protein family member 2	ABLIM2
124	ABLIM3	1.43568	1.48565	1.0348	0.000115593	2.09398e-06	0.37397	3.93303	4.45477	4.50412	3.94953	3.9855	3.88544	3.90962	4.48054	4.56178	4.33621	4.43132	4.50079	4.45767	4.56325	4.49277	14.3215	14.7094	13.7802	14.0928	21.2949	22.5518	19.3038	20.5655	21.7842	20.8836	22.7363	21.619	22885	chr5	148521046	148640001	5317	+	NM_014945	protein_coding	.	P14452	actin binding LIM protein family member 3	ABLIM3
125	ABO	1	1	1	1	1	1	0	0	0	0	0	0	0	0	0	0	0	0	0	0	0	0	0	0	0	0	0	0	0	0	0	0	0	28	chr9	136130563	136150630	1579	-	NM_020469	protein_coding	A3GALNT|A3GALT1|GTB|NAGAT	P25185	ABO blood group (transferase A, alpha 1-3-N-acetylgalactosaminyltransferase	ABO
126	ABR	1.07575	1.13214	1.05242	0.0332618	0.000320087	0.095004	5.06833	5.17367	5.24738	5.03542	5.11198	5.0508	5.07398	5.23863	5.17288	5.0791	5.19933	5.19794	5.24539	5.27258	5.27235	31.5272	33.3027	32.1502	32.8243	36.7045	34.9682	32.9846	35.7239	35.9499	36.7736	37.8165	37.8346	29	chr17	906758	1090616	6656	-	NM_001092	protein_coding	FLJ45954|MDB	P567	active BCR-related	ABR
127	ABRA	1.00236	0.984056	0.981737	0.876199	0.276252	0.355794	0.0413009	0.0447047	0.0181131	0.0561507	0.0283304	0.0284883	0.052003	1.23563e-05	0.0912485	0.0287503	0.0572211	0	3.81673e-05	0.0710904	0	0.0390889	0.0194561	0.0199476	0.0369942	0	0.064989	0.0203783	0.0404239	0	0	0.0508782	0	137735	chr8	107771711	107782472	2754	-	NM_139166	protein_coding	STARS	P20495	actin binding Rho activating protein	ABRA
128	ABRACL	1.09512	1.02392	0.93499	0.037661	0.576777	0.193108	5.58615	5.71723	5.62026	5.52306	5.5725	5.63392	5.61265	5.60557	5.80399	5.7029	5.74917	5.71847	5.52561	5.69588	5.52981	44.6063	46.1991	48.6618	48.1346	47.6229	54.7067	51.3665	52.7609	52.0055	44.8671	51.0555	45.4276	58527	chr6	139349819	139364439	845	+	NM_021243	protein_coding	.	P35743	ABRA C-terminal like	ABRACL
129	ABT1	0.988425	0.98333	0.994846	0.76647	0.636038	0.88125	4.68565	4.66885	4.66139	4.57924	4.67649	4.71756	4.76298	4.62124	4.62269	4.64941	4.77632	4.70012	4.58271	4.71259	4.64653	22.7118	24.3682	25.313	26.2619	23.5776	23.5641	24.2287	26.3913	25.1651	22.8611	25.329	24.167	29777	chr6	26597171	26600277	2263	+	NM_013375	protein_coding	hABT1	P146	activator of basal transcription 1	ABT1
130	ABTB1	1.01318	1.03795	1.02445	0.859042	0.68921	0.793387	2.72774	2.74663	2.78147	2.64905	2.92207	2.60581	2.71313	2.89431	2.76995	2.75927	2.54094	2.99118	2.49059	2.72918	2.86792	5.22674	6.52678	5.08789	5.58167	6.42605	5.8032	5.80239	4.81711	6.9963	4.59794	5.6557	6.33091	80325	chr3	127391781	127399769	2015	+	NM_032548	protein_coding	BPOZ|BTB3|EF1ABP|MGC20585	P9345	ankyrin repeat and BTB domain containing 1	ABTB1
131	ABTB2	1.29422	1.48039	1.14385	1.76105e-06	4.01852e-07	0.000187173	3.37241	3.74449	3.93839	3.37097	3.33633	3.38877	3.39288	3.77967	3.72072	3.71801	3.75863	3.91276	3.91412	3.93605	3.98929	9.26169	9.01803	9.47531	9.54768	12.7161	12.1473	12.2259	12.529	14.1539	14.0163	14.3658	14.9522	25841	chr11	34172534	34379555	4903	-	NM_145804	protein_coding	DKFZp586C1619	P10834	ankyrin repeat and BTB domain containing 2	ABTB2
132	ACAA1	1.07742	1.10527	1.02585	0.218067	0.153835	0.740334	4.24499	4.35258	4.38939	4.16412	4.24869	4.31364	4.24963	4.51787	4.32463	4.36882	4.17872	4.58722	4.25583	4.26749	4.42145	16.7827	17.8584	18.8874	18.1003	21.8793	18.98	19.7678	17.1014	23.1896	18.0243	18.3397	20.5292	30	chr3	38164201	38178733	1819	-	NM_001607	protein_coding	ACAA|PTHIO|THIO	P25188	acetyl-CoA acyltransferase 1	ACAA1
133	ACAA2	0.992543	0.967628	0.974898	0.879577	0.526101	0.458572	3.97384	3.96304	3.92637	4.13414	3.85112	3.93306	3.96212	3.90093	4.01429	4.01617	3.91683	3.98653	3.86854	3.98366	3.86176	16.4254	13.3172	14.2761	14.6476	13.9182	15.114	15.2626	14.0967	14.9528	13.546	14.884	13.6071	10449	chr18	47309874	47340251	1934	-	NM_006111	protein_coding	DSAEC|FLJ35992|FLJ95265	P35894	acetyl-CoA acyltransferase 2	ACAA2
134	ACACA	0.948672	0.986625	1.04001	0.0148956	0.379879	0.0839273	4.03449	3.95847	4.01506	4.06355	4.02735	4.02087	4.02578	4.00749	3.96164	3.9065	3.95649	3.98704	4.04435	3.98011	4.0474	15.5909	15.1796	15.2347	15.3535	15.0619	14.5358	14.0741	14.5174	14.9594	15.4322	14.8456	15.6116	31	chr17	35441927	35766902	11380	-	NM_198838	protein_coding	ACAC|ACC|ACC1|ACCA	P18070	acetyl-CoA carboxylase alpha	ACACA
135	ACACB	0.939059	0.944485	1.00578	0.27046	0.1872	0.905924	0.826944	0.736232	0.744545	0.906403	0.898981	0.731482	0.762339	0.621842	0.716199	0.694439	0.897887	0.707943	0.78871	0.675496	0.802096	0.867005	0.857453	0.660424	0.699574	0.53787	0.640585	0.622282	0.862904	0.638587	0.724032	0.600288	0.747687	32	chr12	109577202	109706030	9249	+	NM_001093	protein_coding	ACC2|ACCB|HACC275	P20814	acetyl-CoA carboxylase beta	ACACB
136	ACAD10	0.951663	0.95617	1.00474	0.286106	0.372977	0.934741	1.83264	1.76116	1.76798	1.80674	1.85711	1.90581	1.75659	1.82789	1.71255	1.86172	1.63079	1.86861	1.58513	1.81621	1.78632	2.47723	2.60101	2.74747	2.38958	2.54651	2.27009	2.64884	2.09569	2.66995	1.99049	2.53272	2.46198	80724	chr12	112123857	112194911	4107	+	NM_001136538	protein_coding	MGC5601	P26188	acyl-CoA dehydrogenase family member 10	ACAD10
137	ACAD11	1.00401	1.09827	1.09388	0.939756	0.272192	0.324801	1.86162	1.86739	1.99685	1.84297	1.75487	1.91459	1.92754	2.03909	1.7711	1.82745	1.81671	2.0937	2.09531	2.09345	1.65802	2.56475	2.35336	2.77036	2.81626	3.10558	2.40522	2.56393	2.52145	3.28989	3.2595	3.28129	2.16817	84129	chr3	132276982	132378975	1630	-	NM_032169	protein_coding	FLJ12592|MGC150619	P33416	acyl-CoA dehydrogenase family member 11	ACAD11
138	ACAD8	0.993836	0.922484	0.928206	0.868108	0.202444	0.212605	4.44876	4.43984	4.33236	4.36027	4.55302	4.4527	4.4223	4.34478	4.48898	4.46888	4.45246	4.51252	4.1689	4.34126	4.28533	19.3747	22.292	20.8998	20.5279	19.2917	21.3914	21.2593	20.8838	21.9721	16.91	19.3545	18.5934	27034	chr11	134123434	134135746	2201	+	NM_014384	protein_coding	ACAD-8|ARC42|FLJ22590	P11937	acyl-CoA dehydrogenase family member 8	ACAD8
139	ACAD9	1.01385	0.988814	0.975302	0.643118	0.757081	0.569955	4.15701	4.17686	4.14078	4.17693	4.10696	4.16681	4.17618	4.26367	4.14468	4.20136	4.09205	4.06952	4.06497	4.26427	4.15517	16.9457	16.0952	16.963	17.1509	18.1832	16.6373	17.4912	16.0462	15.9002	15.6671	18.2943	16.9011	28976	chr3	128598333	128631957	2495	+	NM_014049	protein_coding	FLJ23533|MGC14452|NPD002	P27711	acyl-CoA dehydrogenase family member 9	ACAD9
140	ACADL	1.07668	0.932468	0.86606	0.0232058	0.0357984	0.000603713	0.190175	0.296764	0.0893021	0.260903	0.12181	0.180899	0.193699	0.310714	0.341135	0.239691	0.293641	0.0834151	0.0427723	0.154171	0.07454	0.196144	0.0867834	0.133611	0.14458	0.239926	0.265858	0.182039	0.225597	0.0604065	0.0296919	0.113573	0.0536313	33	chr2	211052716	211090215	2490	-	NM_001608	protein_coding	ACAD4|FLJ94052|LCAD	P5498	acyl-CoA dehydrogenase, long chain	ACADL
141	ACADM	1.02512	1.00568	0.98104	0.186961	0.841974	0.560773	4.499	4.53479	4.50717	4.48956	4.50571	4.51191	4.48866	4.46847	4.55931	4.5354	4.57373	4.51435	4.45402	4.61019	4.44401	21.285	21.5367	21.8173	21.542	21.1081	22.5094	22.3106	22.8028	22.0036	20.8255	23.5238	20.8711	34	chr1	76190032	76229363	2821	+	NM_001127328	protein_coding	ACAD1|FLJ18227|FLJ93013|FLJ99884|MCAD|MCADH	P3086	acyl-CoA dehydrogenase, C-4 to C-12 straight chain	ACADM
142	ACADS	1.01179	1.03258	1.02055	0.921567	0.794982	0.879969	1.99257	2.00948	2.03883	1.99825	2.21378	1.70213	2.01078	2.08509	1.90161	2.29331	1.68903	2.36198	1.86991	1.77097	2.0799	2.96946	3.61015	2.25409	3.04325	3.23845	2.72746	3.92154	2.22311	4.16645	2.64253	2.42472	3.24391	35	chr12	121163541	121177811	2087	+	NM_001302554	protein_coding	ACAD3|SCAD	P6550	acyl-CoA dehydrogenase, C-2 to C-3 short chain	ACADS
143	ACADSB	1.06071	1.05676	0.996274	0.125432	0.100439	0.872517	2.56905	2.65408	2.64869	2.45134	2.62351	2.5784	2.61641	2.6108	2.73225	2.65283	2.61717	2.64745	2.67107	2.60537	2.66992	4.4294	5.1191	4.97329	5.15445	5.10106	5.62823	5.31808	5.13291	5.30192	5.3456	5.10803	5.39071	36	chr10	124768429	124817806	5941	+	NM_001609	protein_coding	2-MEBCAD|ACAD7|SBCAD	P19204	acyl-CoA dehydrogenase, short/branched chain	ACADSB
144	ACADVL	1.02657	1.0282	1.00158	0.276734	0.396076	0.962574	6.10486	6.1427	6.14498	6.07923	6.15783	6.10309	6.07784	6.11405	6.2127	6.14034	6.10109	6.21208	6.03975	6.12315	6.19844	66.0583	69.817	67.7476	66.832	68.1684	72.9479	69.9183	67.6121	73.633	64.5042	69.0012	72.7971	37	chr17	7120444	7128586	2444	+	NM_001270447	protein_coding	ACAD6|LCACD|VLCAD	P25512	acyl-CoA dehydrogenase, very long chain	ACADVL
145	ACAN	0.999998	1.00796	1.00797	0.284072	0.1345	0.134422	3.97167e-06	1.17377e-06	0.0114484	7.95554e-06	7.93113e-06	0	0	1.34934e-06	2.87728e-06	0	4.68463e-07	0	0.0236203	0.0219925	0	0	0	0	0	0	0	0	0	0	0.0163568	0.0155026	0	176	chr15	89346674	89418585	8840	+	NM_013227	protein_coding	AGC1|AGCAN|CSPG1|CSPGCP|MSK16|SEDK	P26378	aggrecan	ACAN
146	ACAP1	0.938393	0.946174	1.00829	0.0952409	0.125659	0.773972	0.260717	0.168981	0.180894	0.285068	0.309332	0.15114	0.291896	0.23076	0.194738	0.152992	0.0938519	0.199571	0.123124	0.153005	0.244905	0.216241	0.236796	0.110466	0.225404	0.173121	0.143879	0.112877	0.0671474	0.14983	0.0883845	0.112681	0.186231	9744	chr17	7239848	7254793	2508	+	NM_014716	protein_coding	CENTB1|KIAA0050	P13008	ArfGAP with coiled-coil, ankyrin repeat and PH domains 1	ACAP1
147	ACAP2	1.03037	1.01386	0.983979	0.366877	0.583159	0.547292	3.59665	3.63981	3.61651	3.64478	3.51447	3.63988	3.58363	3.60908	3.66823	3.56526	3.71231	3.58422	3.64182	3.6479	3.59096	11.4124	10.3389	11.4668	11.0363	11.1864	11.6779	10.8975	12.1016	11.0701	11.4323	11.5851	11.1058	23527	chr3	194995465	195163817	7170	-	NM_012287	protein_coding	CENTB2|CNT-B2|KIAA0041	P28070	ArfGAP with coiled-coil, ankyrin repeat and PH domains 2	ACAP2
148	ACAP3	1.07737	1.05677	0.980879	0.17506	0.208147	0.629617	3.32419	3.4317	3.40385	3.44489	3.3522	3.28381	3.20505	3.44191	3.46167	3.52183	3.29158	3.47104	3.40493	3.34504	3.39155	9.80803	9.13457	8.74022	8.25867	9.85337	9.98729	10.5421	8.78737	10.1571	9.55027	9.20199	9.54214	116983	chr1	1227764	1243269	3759	-	NM_030649	protein_coding	CENTB5|KIAA1716	P2574	ArfGAP with coiled-coil, ankyrin repeat and PH domains 3	ACAP3
149	ACAT1	1.02612	1.01481	0.98898	0.380913	0.420914	0.643276	5.73174	5.76893	5.75294	5.67537	5.74756	5.78502	5.71674	5.75323	5.77525	5.84761	5.69551	5.74713	5.7318	5.76457	5.76799	49.6856	52.2898	54.1455	51.8109	52.8634	53.6061	56.8913	50.7977	53.0715	51.9153	53.595	53.7593	38	chr11	107992258	108018891	2134	+	NM_000019	protein_coding	ACAT|MAT|T2|THIL	P2821	acetyl-CoA acetyltransferase 1	ACAT1
150	ACAT2	1.02105	0.961215	0.941395	0.454821	0.184406	0.0402232	5.82096	5.85102	5.76389	5.76337	5.89508	5.78531	5.83648	5.91634	5.84935	5.8213	5.81482	5.81306	5.69986	5.78162	5.75865	52.874	58.0293	54.1567	56.3805	59.3111	56.4842	55.8471	55.2636	55.6002	50.755	54.245	53.4075	39	chr6	160182989	160200087	1852	+	NM_005891	protein_coding	.	P17549	acetyl-CoA acetyltransferase 2	ACAT2
151	ACBD3	1.00697	0.996677	0.989778	0.873007	0.941968	0.790136	4.22306	4.23308	4.21826	4.20545	4.19918	4.35364	4.12428	4.31511	4.14791	4.21243	4.25177	4.1539	4.15967	4.22916	4.32373	17.3029	17.2238	19.4465	16.5108	18.8794	16.6763	17.6345	18.0418	16.9181	16.7979	17.8317	19.1187	64746	chr1	226332380	226374423	3565	-	NM_022735	protein_coding	GCP60|GOCAP1|GOLPH1|PAP7	P19862	acyl-CoA binding domain containing 3	ACBD3
152	ACBD4	0.890905	0.975166	1.09458	0.0280826	0.741061	0.229287	1.88601	1.71935	1.84973	1.80544	1.79488	1.91952	2.013	1.73473	1.69165	1.68689	1.76275	1.6443	2.07493	1.86462	1.78088	2.47384	2.44854	2.78325	3.04856	2.32466	2.22295	2.23288	2.39221	2.1422	3.20017	2.65333	2.44911	79777	chr17	43209967	43221543	2851	+	NM_001135704	protein_coding	FLJ13322|FLJ90623	P25434	acyl-CoA binding domain containing 4	ACBD4
153	ACBD5	0.93044	0.965411	1.03759	0.0391698	0.348571	0.275776	3.88158	3.77756	3.83079	3.80428	3.84839	3.9342	3.93505	3.83935	3.76371	3.74038	3.76486	3.71601	3.88402	3.87849	3.8384	12.8614	13.2928	14.2881	14.3555	13.2951	12.5443	12.4341	12.5874	12.2266	13.7045	13.7668	13.3711	91452	chr10	27484143	27531068	4056	-	NM_001301254	protein_coding	DKFZp434A2417|KIAA1996	P7435	acyl-CoA binding domain containing 5	ACBD5
154	ACBD6	0.992037	1.04807	1.05648	0.873234	0.472346	0.359627	5.56712	5.55558	5.63485	5.43002	5.51581	5.62704	5.68239	5.58361	5.50198	5.65322	5.47677	5.76076	5.43356	5.68197	5.64323	41.7571	44.3804	48.4257	50.566	46.8887	44.1827	49.5934	43.5103	53.5794	42.0316	50.5554	49.2215	84320	chr1	180257352	180472022	1616	-	NM_032360	protein_coding	MGC2404	P31681	acyl-CoA binding domain containing 6	ACBD6
155	ACBD7	0.974203	0.944449	0.969459	0.435127	0.280424	0.458256	2.26836	2.23066	2.18591	2.36307	2.16337	2.23945	2.30002	2.26144	2.19754	2.22224	2.24064	2.07746	2.09765	2.29667	2.25899	4.11107	3.44946	3.72257	3.94127	3.7893	3.57582	3.68668	3.7242	3.24446	3.2648	3.93017	3.80565	414149	chr10	15117474	15130775	3370	-	NM_001039844	protein_coding	FLJ38219|FLJ52263|MGC33893|bA455B2.2	P11364	acyl-CoA binding domain containing 7	ACBD7
156	ACCS	0.954549	1.00336	1.05114	0.446654	0.96158	0.452897	0.934177	0.867068	0.939022	1.03254	0.933694	0.742364	1.01042	0.923838	0.926842	0.901458	0.704508	0.956622	1.12149	0.86458	0.792128	1.03682	0.902011	0.673003	1.01893	0.895778	0.898165	0.873195	0.629191	0.947621	1.17079	0.824854	0.736007	84680	chr11	44087729	44105569	2317	+	NM_001127219	protein_coding	ACS|PHACS	P31872	1-aminocyclopropane-1-carboxylate synthase homolog (inactive)	ACCS
157	ACCSL	0.992248	0.992248	1	0.355861	0.355856	0.917453	0.011228	1.13421e-06	1.00688e-06	0.0443895	7.66382e-06	0	0	1.30386e-06	2.7803e-06	0	4.52674e-07	0	4.0275e-06	0	0	0.0307854	0	0	0	0	0	0	0	0	0	0	0	390110	chr11	44069531	44081527	1820	+	NM_001031854	protein_coding	.	P34107	1-aminocyclopropane-1-carboxylate synthase (inactive)-like	ACCSL
158	ACD	1.02432	0.999918	0.976182	0.47345	0.998818	0.635573	4.3104	4.34506	4.31029	4.37059	4.36087	4.30285	4.20107	4.40063	4.28707	4.32385	4.36616	4.41411	4.30717	4.11288	4.3881	19.5235	19.3859	18.7393	17.4685	20.0932	18.4664	19.1309	19.6131	20.4572	18.7142	16.3757	20.0374	65057	chr16	67691415	67694718	2018	-	NM_022914	protein_coding	PIP1|PTOP|TINT1|TPP1	P1563	adrenocortical dysplasia homolog	ACD
159	ACE	0.997565	0.997565	1	0.355756	0.355751	0.917452	0.00351791	3.63249e-07	3.22469e-07	2.46202e-06	2.45447e-06	0	0.0140156	4.17583e-07	8.90439e-07	0	1.44976e-07	0	1.28987e-06	0	0	0	0	0	0.00985844	0	0	0	0	0	0	0	0	1636	chr17	61554422	61575741	5219	+	NM_000789	protein_coding	ACE1|CD143|DCP|DCP1|MGC26566|MVCD3	P247	angiotensin I converting enzyme	ACE
160	ACE2	0.99648	1.00132	1.00486	0.355534	0.832198	0.355903	0.00508836	1.24779e-06	0.0069984	8.45723e-06	8.43128e-06	0	0.02023	1.43443e-06	3.05872e-06	0	4.98005e-07	0	4.43081e-06	0.0277878	0	0	0	0	0.0142516	0	0	0	0	0	0	0.0196173	0	59272	chrX	15579156	15620192	3507	-	NM_021804	protein_coding	ACEH|DKFZp434A014	P34377	angiotensin I converting enzyme 2	ACE2
161	ACER1	0.973673	0.993503	1.02037	0.402461	0.883003	0.603708	0.0589363	0.0204463	0.0495324	9.0569e-05	0.154264	0	0.0757014	0.0800659	3.27565e-05	0	5.33325e-06	0	4.74503e-05	0	0.188635	0	0.111642	0	0.0542568	0.0569341	0	0	0	0	0	0	0.140521	125981	chr19	6306510	6333640	1088	-	NM_133492	protein_coding	ALKCDase1|ASAH3|MGC138327|MGC138329	P24378	alkaline ceramidase 1	ACER1
162	ACER2	1.00933	0.9253	0.916743	0.841469	0.153749	0.132743	0.620975	0.63438	0.508969	0.633191	0.732453	0.54681	0.56399	0.680756	0.483265	0.682227	0.681299	0.551026	0.389421	0.449154	0.634031	0.545875	0.655833	0.460911	0.480782	0.602067	0.396342	0.608149	0.603266	0.468984	0.307876	0.367397	0.554971	340485	chr9	19408925	19452500	2852	+	NM_001010887	protein_coding	ALKCDase2|ASAH3L|FLJ41587	P14743	alkaline ceramidase 2	ACER2
163	ACER3	1.09273	1.06561	0.975179	0.0263783	0.205814	0.591836	3.27058	3.39852	3.36226	3.2946	3.22158	3.34157	3.22093	3.30424	3.44871	3.40478	3.43205	3.28969	3.50187	3.38877	3.25586	8.73771	8.25645	9.13802	8.36063	8.86542	9.88922	9.64316	9.78846	8.84047	10.2847	9.51524	8.59637	55331	chr11	76571917	76737841	7502	+	NM_018367	protein_coding	APHC|FLJ11238|PHCA	P15067	alkaline ceramidase 3	ACER3
164	ACHE	1.0483	1.03848	0.990633	0.381458	0.285454	0.836062	0.157349	0.225405	0.211828	0.150754	0.0726906	0.266781	0.132245	0.205895	0.378804	0.103155	0.199923	0.205758	0.273932	0.168854	0.196686	0.108648	0.0506795	0.203147	0.0967107	0.153094	0.299301	0.0749157	0.148532	0.154783	0.207967	0.125004	0.14712	43	chr7	100487615	100493754	2388	-	NM_001282449	protein_coding	ARACHE|N-ACHE|YT	P13334	acetylcholinesterase (Cartwright blood group)	ACHE
165	ACIN1	1.0128	0.995113	0.982532	0.7448	0.930993	0.742196	6.19154	6.2099	6.18447	6.06592	6.25944	6.19859	6.23461	6.22243	6.19072	6.29163	6.13011	6.28366	5.98498	6.18363	6.26658	65.4396	74.9856	72.4526	74.617	73.5649	71.8287	77.7571	69.006	77.4298	62.0621	71.9984	76.3663	22985	chr14	23527774	23564823	5104	-	NM_014977	protein_coding	ACINUS|ACN|DKFZp667N107|KIAA0670|fSAP152	P14570	apoptotic chromatin condensation inducer 1	ACIN1
166	ACKR1	1	1	1	1	1	1	0	0	0	0	0	0	0	0	0	0	0	0	0	0	0	0	0	0	0	0	0	0	0	0	0	0	0	2532	chr1	159173803	159176290	3250	+	NM_002036	protein_coding	.	P11548	atypical chemokine receptor 1 (Duffy blood group)	ACKR1
167	ACKR2	0.99587	1.01514	1.01935	0.568121	0.342814	0.233752	0.0126778	0.00670643	0.0343519	3.75125e-05	0.0262143	0	0.0242383	6.36252e-06	1.35672e-05	0.0266189	2.20894e-06	0	0.069927	0.0658799	0	0	0.0180057	0	0.0171033	0	0	0.0188427	0	0	0.049313	0.0470577	0	1238	chr3	42850964	42908775	2960	+	NM_001296	protein_coding	.	P5589	atypical chemokine receptor 2	ACKR2
168	ACKR3	0.987754	0.99665	1.00901	0.355639	0.83211	0.355898	0.0177798	3.18087e-06	0.0129386	2.15592e-05	2.1493e-05	0	0.0698001	3.65665e-06	7.79732e-06	0	1.26952e-06	0.0510614	1.1295e-05	0	0	0	0	0	0.0499063	0	0	0	0	0.0364571	0	0	0	57007	chr2	237478380	237490994	2100	+	NM_020311	protein_coding	.	P3930	atypical chemokine receptor 3	ACKR3
169	ACKR4	1.01375	1.00902	0.995332	0.834253	0.865231	0.91162	0.189391	0.209094	0.202344	0.121607	0.0340705	0.362999	0.218087	0.330308	0.0732834	0.255323	0.164599	0.173727	0.252975	0.189207	0.192189	0.0866162	0.0232039	0.286129	0.164151	0.256868	0.0517431	0.194963	0.120761	0.129319	0.190583	0.141037	0.143541	51554	chr3	132316081	132321485	4845	+	NM_016557	protein_coding	.	P23438	atypical chemokine receptor 4	ACKR4
170	ACLY	0.994069	1.01377	1.01982	0.79058	0.461261	0.474012	6.68388	6.6753	6.70362	6.65589	6.69919	6.6821	6.69793	6.73524	6.60619	6.64663	6.70955	6.70005	6.6489	6.70279	6.76057	99.0075	102.059	101.697	103.256	105.391	96.1321	99.7352	103.608	103.676	98.9171	103.617	107.96	47	chr17	40023170	40075272	5341	-	NM_001303274	protein_coding	ACL|ATPCL|CLATP	P28799	ATP citrate lyase	ACLY
171	ACMSD	1.03826	0.99999	0.963139	0.163019	0.288923	0.162929	1.9129e-05	0.0541886	5.01863e-06	3.83165e-05	3.81989e-05	0	0	6.49888e-06	0.0747358	0.137406	2.25628e-06	0	2.00744e-05	0	0	0	0	0	0	0	0.0529142	0.100633	0	0	0	0	0	130013	chr2	135596186	135659602	1357	+	NM_001307983	protein_coding	.	P3418	aminocarboxymuconate semialdehyde decarboxylase	ACMSD
172	ACO1	0.934667	0.909109	0.972656	0.00629785	0.00310337	0.279373	5.97959	5.88211	5.84211	5.96038	6.01645	5.96921	5.97165	5.89789	5.82638	5.87883	5.92361	5.79218	5.86334	5.80347	5.90648	60.7599	63.2105	61.6552	62.0159	58.5439	55.5746	58.1606	59.6702	54.7898	56.966	55.0893	59.2774	48	chr9	32384601	32450832	3620	+	NM_001278352	protein_coding	ACONS|IREB1|IREBP|IREBP1|IRP1	P23456	aconitase 1	ACO1
173	ACO2	0.979662	0.982637	1.00304	0.55715	0.50253	0.911259	4.84319	4.81355	4.81792	4.80124	4.93615	4.82508	4.80604	4.91316	4.75904	4.78581	4.7912	4.80671	4.80028	4.80536	4.85855	26.6573	29.3725	27.349	27.0897	29.09	25.9985	26.7312	26.6751	27.1731	26.7454	27.0789	28.1508	50	chr22	41865129	41924993	2741	+	NM_001098	protein_coding	ACONM|MGC20605|MGC33908	P34775	aconitase 2	ACO2
174	ACOT1	0.969418	1.06231	1.09583	0.70875	0.499704	0.308069	0.44969	0.40488	0.5369	0.442602	0.2811	0.664396	0.382841	0.47941	0.212914	0.569038	0.332487	0.372274	0.523032	0.454706	0.76684	0.355337	0.212278	0.584966	0.30565	0.39351	0.158136	0.486399	0.258997	0.297153	0.434808	0.372478	0.704752	641371	chr14	74003928	74010498	1603	+	NM_001037161	protein_coding	ACH2|CTE-1|LACH2	P26785	acyl-CoA thioesterase 1	ACOT1
175	ACOT11	0.956522	0.983671	1.02838	0.196319	0.459019	0.367678	0.123928	0.0597985	0.100175	0.0794943	0.114715	0.190048	0.109135	0.0776447	7.33309e-05	0	0.155666	0.105023	0.105042	0.0503972	0.138851	0.0557838	0.0816765	0.140821	0.0791208	0.0551491	0	0	0.113858	0.07636	0.0749861	0.0358925	0.101766	26027	chr1	55013807	55100417	3391	+	NM_147161	protein_coding	BFIT|BFIT1|BFIT2|KIAA0707|STARD14|THEA|THEM1	P15430	acyl-CoA thioesterase 11	ACOT11
176	ACOT12	0.999995	1.01918	1.01919	0.284072	0.356019	0.355909	9.65674e-06	2.85391e-06	0.0274231	1.93431e-05	1.92837e-05	0	0	3.28078e-06	6.99583e-06	0	1.13902e-06	0.106688	1.0134e-05	0	0	0	0	0	0	0	0	0	0	0.0774824	0	0	0	134526	chr5	80625947	80689988	1989	-	NM_130767	protein_coding	CACH-1|Cach|MGC105114|STARD15|THEAL	P28982	acyl-CoA thioesterase 12	ACOT12
177	ACOT13	1.00385	0.988523	0.984735	0.942108	0.802277	0.635923	2.14123	2.14677	2.12458	2.17694	2.13076	2.26868	1.97281	2.04668	2.23778	2.17689	2.11882	2.15219	2.14537	2.07417	2.12529	3.49243	3.35078	3.8192	2.93888	3.12687	3.70568	3.54119	3.3417	3.46905	3.40885	3.22564	3.38017	55856	chr6	24667263	24705295	4393	+	NM_018473	protein_coding	MGC4961|PNAS-27|THEM2	P28121	acyl-CoA thioesterase 13	ACOT13
178	ACOT2	0.959027	1.00638	1.04938	0.326615	0.895096	0.267798	4.19282	4.13246	4.20199	4.21147	4.05323	4.21892	4.27818	4.09707	4.19306	4.06369	4.17213	4.27416	4.08401	4.15837	4.28199	17.3807	15.4689	17.6236	18.4798	16.0905	17.239	15.8101	17.0192	18.4727	15.8885	16.93	18.5447	10965	chr14	74034324	74042362	2408	+	NR_046028	protein_coding	CTE1A|MTE1|PTE2|PTE2A|ZAP128	.	acyl-CoA thioesterase 2	ACOT2
179	ACOT4	1.09545	1.03456	0.944415	0.39265	0.669816	0.578675	0.526585	0.658107	0.575599	0.54324	0.317339	0.515663	0.70411	0.853593	0.30284	0.628825	0.78674	0.657921	0.362846	0.539678	0.71701	0.452609	0.242654	0.429708	0.631949	0.805927	0.232374	0.549651	0.724822	0.582129	0.284048	0.456058	0.64711	122970	chr14	74058410	74062470	1632	+	NM_152331	protein_coding	PTE-Ib|PTE1B|PTE2B	P36239	acyl-CoA thioesterase 4	ACOT4
180	ACOT6	0.971264	0.992539	1.02191	0.714729	0.93322	0.847027	0.263932	0.221867	0.253128	0.248263	0.247339	0.175088	0.377581	9.35792e-05	0.188032	0.480527	0.176884	0.519195	0.325074	0.112725	0	0.185636	0.184887	0.129055	0.300583	0	0.138551	0.397392	0.130336	0.435981	0.251404	0.081982	0	641372	chr14	74083548	74086592	1004	+	NM_001037162	protein_coding	C14orf42|MGC161656|MGC161658|c14_5530	P20079	acyl-CoA thioesterase 6	ACOT6
181	ACOT7	1.09108	1.05155	0.963775	0.013691	0.126738	0.240769	5.55004	5.67579	5.62256	5.58993	5.50657	5.50413	5.59685	5.6914	5.60315	5.67754	5.72824	5.65286	5.60879	5.53815	5.68622	46.7727	44.0895	44.3894	47.599	50.604	47.4657	50.4538	51.9865	49.6499	47.591	45.6663	50.7404	11332	chr1	6324332	6453826	2389	-	NM_007274	protein_coding	ACH1|ACT|BACH|CTE-II|LACH|LACH1|MGC1126|RP1-120G22.10|hBACH	P24912	acyl-CoA thioesterase 7	ACOT7
182	ACOT8	0.963196	0.995339	1.03337	0.595389	0.945784	0.702021	4.00045	3.94635	3.99371	3.85789	4.02159	4.02347	4.08893	3.80341	3.98359	4.15487	3.81452	4.08803	3.74073	3.9955	4.12073	13.3838	15.1155	15.264	16.0843	12.9428	14.7743	16.9025	13.0631	16.1146	12.3114	15.0152	16.4766	10005	chr20	44470360	44486048	1171	-	NM_005469	protein_coding	HNAACTE|PTE-2|PTE1|PTE2|hACTE-III|hTE	P29918	acyl-CoA thioesterase 8	ACOT8
183	ACOT9	1.02079	1.02118	1.00039	0.615327	0.590016	0.992442	5.40774	5.43742	5.43798	5.38064	5.38831	5.51114	5.34536	5.42709	5.4307	5.54423	5.34036	5.45739	5.4672	5.49903	5.32202	40.3219	40.5435	44.6104	39.825	41.9653	42.0056	45.9107	39.4947	43.2311	43.05	44.4153	39.1994	23597	chrX	23721777	23761407	1727	-	NM_001033583	protein_coding	ACATE2|MT-ACT48	P17156	acyl-CoA thioesterase 9	ACOT9
184	ACOX1	0.988897	1.02016	1.03162	0.689636	0.605704	0.433466	2.63406	2.61796	2.66286	2.66499	2.5571	2.67762	2.63353	2.5331	2.64426	2.63825	2.65295	2.5661	2.75163	2.60116	2.72399	5.29759	4.84312	5.39856	5.2279	4.78104	5.23576	5.25473	5.28691	4.95705	5.7103	5.09032	5.63462	51	chr17	73937589	73975515	8389	-	NM_007292	protein_coding	ACOX|MGC1198|PALMCOX|SCOX	P572	acyl-CoA oxidase 1, palmitoyl	ACOX1
185	ACOX2	0.857579	0.940414	1.09659	0.0234128	0.127743	0.167877	1.60405	1.38239	1.51542	1.66477	1.54807	1.58894	1.61194	1.37314	1.30753	1.24856	1.57843	1.62578	1.44151	1.44336	1.54279	2.15312	1.90795	2.0085	2.06532	1.58783	1.47005	1.38501	1.98546	2.10021	1.708	1.72757	1.92337	8309	chr3	58490863	58522929	2309	-	NM_003500	protein_coding	BCOX|BRCACOX|BRCOX|THCCox	P19641	acyl-CoA oxidase 2, branched chain	ACOX2
186	ACOX3	0.987144	1.09208	1.1063	0.851783	0.275249	0.149473	2.37949	2.36082	2.50657	2.3539	2.46582	2.14717	2.52307	2.49335	2.28438	2.27604	2.37868	2.58827	2.31731	2.46466	2.63526	4.07652	4.48686	3.42999	4.7679	4.62437	3.85914	3.86591	4.19848	5.04684	3.96575	4.53964	5.23756	8310	chr4	8368009	8442452	2874	-	NM_003501	protein_coding	.	P21423	acyl-CoA oxidase 3, pristanoyl	ACOX3
187	ACOXL	0.998082	1.01681	1.01876	0.971641	0.807865	0.718318	0.50401	0.501239	0.528056	0.680031	0.524718	0.409973	0.38196	0.428219	0.520665	0.562627	0.490131	0.62047	0.557354	0.591162	0.324853	0.597092	0.434382	0.328708	0.304919	0.34493	0.433073	0.4799	0.40433	0.541312	0.469234	0.508876	0.254472	55289	chr2	111490150	111875799	2373	+	NM_001142807	protein_coding	FLJ11042	P6660	acyl-CoA oxidase-like	ACOXL
188	ACP1	1.03244	0.980324	0.949523	0.152484	0.44068	0.0467008	5.50081	5.54687	5.47214	5.49676	5.44189	5.55608	5.50624	5.50967	5.53156	5.56533	5.57986	5.50954	5.47085	5.50745	5.39793	43.7862	42.1145	46.0534	44.6401	44.4962	45.12	46.6031	46.8078	44.8604	43.16	44.6823	41.3714	52	chr2	264869	278282	1580	+	NM_004300	protein_coding	HAAP|MGC111030|MGC3499	P30160	acid phosphatase 1, soluble	ACP1
189	ACP2	0.975684	1.00126	1.02622	0.588154	0.977729	0.429212	3.95466	3.91915	3.95648	3.91207	3.94601	3.85051	4.09833	3.90178	3.8681	4.00431	3.89868	4.04432	3.89881	3.95256	3.92603	13.936	14.2925	13.4266	16.1954	13.927	13.5604	15.1295	13.908	15.6038	13.8548	14.5455	14.2718	53	chr11	47260853	47270398	2288	-	NM_001610	protein_coding	.	P8273	acid phosphatase 2, lysosomal	ACP2
190	ACP5	0.991276	1.01217	1.02108	0.782066	0.872299	0.777862	0.0835912	0.0709498	0.101044	0.0563051	0.161155	0.11187	0	3.07914e-05	0.109881	0.0577207	0.113236	0	9.51106e-05	0	0.367519	0.0391162	0.116852	0.0806416	0	0	0.0787621	0.0412768	0.0815889	0	0	0	0.291521	54	chr19	11685475	11689801	1631	-	NM_001111036	protein_coding	MGC117378|TRAP	P31386	acid phosphatase 5, tartrate resistant	ACP5
191	ACP6	0.965307	0.992461	1.02813	0.421517	0.84283	0.4305	3.15012	3.09918	3.13921	3.11488	3.26648	3.15299	3.05802	3.09632	2.99726	3.18547	3.11148	3.13024	3.08062	3.21407	3.12867	7.59858	8.55336	7.89579	7.36035	7.5415	6.96283	8.14152	7.63886	7.80944	7.42655	8.31517	7.78533	51205	chr1	147119168	147142634	1808	-	NM_016361	protein_coding	ACPL1|LPAP|PACPL1	P2187	acid phosphatase 6, lysophosphatidic	ACP6
192	ACPP	0.988009	0.993813	1.00587	0.158711	0.536801	0.356056	0.0174061	2.6293e-06	0.0084529	0.0442131	1.77661e-05	0.0249144	0	3.02258e-06	6.44524e-06	0	1.04938e-06	0	0.0335184	0	0	0.0306531	0	0.0174232	0	0	0	0	0	0	0.0233054	0	0	55	chr3	132036211	132087146	1827	+	NM_001134194	protein_coding	ACP-3|ACP3|PAP	P22174	acid phosphatase, prostate	ACPP
193	ACPT	0.959034	0.971894	1.01341	0.0452424	0.223859	0.355883	0.060355	8.25159e-06	0.0192265	0.0622145	0.0619545	0	0.114957	9.48581e-06	2.02272e-05	0	3.29329e-06	0	2.93007e-05	0	0.0753871	0.0434375	0.0432531	0	0.0834367	0	0	0	0	0	0	0	0.0540759	93650	chr19	51293672	51298481	1347	+	NM_033068	protein_coding	.	P18212	acid phosphatase, testicular	ACPT
194	ACR	0.989295	1.09086	1.10266	0.355318	0.325781	0.273348	0.0155443	1.67516e-05	0.141005	0.0610884	0.000113187	0	0	1.92571e-05	4.1063e-05	0	6.6857e-06	0.438393	5.9483e-05	0.0780043	0	0.0425864	0	0	0	0	0	0	0	0.357176	0	0.0559659	0	49	chr22	51176652	51183727	1370	+	NM_001097	protein_coding	.	P31005	acrosin	ACR
195	ACRBP	1.0159	1.02293	1.00692	0.44381	0.593818	0.865767	0.0217641	0.0445216	0.0544756	8.50126e-05	8.47518e-05	0.084993	0	1.44192e-05	0.0469277	0.0861542	0.0437019	0	4.45392e-05	0.206512	0	0	0	0.0606928	0	0	0.0328674	0.0620713	0.030725	0	0	0.154666	0	84519	chr12	6747242	6756580	1886	-	NM_032489	protein_coding	CT23|FLJ51160|OY-TES-1|SP32	P25666	acrosin binding protein	ACRBP
196	ACRC	1.03481	0.997701	0.964144	0.44292	0.956983	0.363661	0.276367	0.325726	0.273047	0.140487	0.286167	0.309399	0.360307	0.380649	0.334524	0.208796	0.37247	0.214874	0.351567	0.203586	0.316519	0.100646	0.216959	0.239224	0.28514	0.301432	0.259988	0.15706	0.294398	0.162306	0.274492	0.152604	0.246883	93953	chrX	70797874	70833433	3178	+	NM_052957	.	NAAR1	P1286	acidic repeat containing	ACRC
197	ACRV1	0.973845	1.0373	1.06516	0.707235	0.800512	0.667274	0.334939	0.296703	0.38777	0.389064	0.4962	0.225251	0.209491	0.477864	0.286307	0.176565	0.227684	0.294487	0.289174	0.835996	0	0.306456	0.406896	0.169009	0.157379	0.392082	0.218586	0.131476	0.170821	0.228599	0.220588	0.787808	0	56	chr11	125542229	125550793	1409	-	NM_020069	protein_coding	D11S4365|SP-10|SPACA2	P10563	acrosomal vesicle protein 1	ACRV1
198	ACSBG1	0.982886	1.00865	1.02621	0.0501705	0.346888	0.025171	0.038035	0.0131313	0.0504575	0.051693	0.0261194	0.0262326	0.0478991	0.0257972	2.57849e-05	0.0264616	4.19817e-06	0.0349839	0.0696549	0.0655776	0.0311949	0.0359156	0.0179153	0.0183539	0.0340329	0.0179822	0	0.018747	0	0.0249024	0.0491021	0.0468512	0.0220989	23205	chr15	78463187	78527049	2968	-	NM_001199377	protein_coding	BG1|BGM|FLJ30320|GR-LACS|KIAA0631|MGC14352|hBG1|hsBG	P8940	acyl-CoA synthetase bubblegum family member 1	ACSBG1
199	ACSBG2	1.0033	0.977791	0.974572	0.893499	0.359378	0.429766	0.082814	0.0875722	0.0504125	0.0622911	0.0620149	0.0929209	0.113373	0.0912967	0.10107	0	0.153709	0	0.123405	0	0.0744245	0.043415	0.0432193	0.0665389	0.082287	0.0651737	0.0722192	0	0.112351	0	0.0887261	0	0.0534173	81616	chr19	6135644	6193114	2783	+	NM_001289180	protein_coding	BGR|BRGL|DKFZp434K1635|MGC111089|PRTD-NY3|PRTDNY3	P13455	acyl-CoA synthetase bubblegum family member 2	ACSBG2
200	ACSF2	1.0041	1.14403	1.13935	0.943766	0.161411	0.144374	2.40474	2.41065	2.59886	2.19274	2.50192	2.45103	2.45348	2.49613	2.31472	2.47319	2.35021	2.77788	2.29635	2.64473	2.63409	3.53846	4.62547	4.46855	4.49685	4.6351	3.96226	4.578	4.09685	5.89559	3.89372	5.27578	5.23297	80221	chr17	48503519	48552206	2371	+	NM_001288968	protein_coding	ACSMW|AVYV493|FLJ20920	P17220	acyl-CoA synthetase family member 2	ACSF2
201	ACSF3	0.98867	0.95738	0.968352	0.675685	0.374836	0.446806	2.65297	2.63653	2.59013	2.70435	2.68096	2.54659	2.67478	2.61187	2.6373	2.62346	2.67275	2.66618	2.4232	2.58566	2.67179	5.47224	5.36809	4.84306	5.4083	5.10562	5.20578	5.19091	5.37381	5.3842	4.34301	5.02521	5.39901	197322	chr16	89160217	89222254	4427	+	NM_001284316	protein_coding	FLJ39242	P30484	acyl-CoA synthetase family member 3	ACSF3
202	ACSL1	1.06392	1.09971	1.03364	0.045846	0.0426054	0.421305	3.81902	3.90841	3.95614	3.87479	3.79037	3.82751	3.78153	3.9902	3.88096	3.88224	3.87703	3.89181	3.99733	4.06438	3.86185	13.5554	12.7271	13.1984	12.8074	14.871	13.6912	13.8215	13.686	13.9394	14.9062	15.7966	13.6073	2180	chr4	185676749	185747268	4743	-	NM_001286708	protein_coding	ACS1|FACL1|FACL2|LACS|LACS1|LACS2	P2125	acyl-CoA synthetase long-chain family member 1	ACSL1
203	ACSL3	1.11592	1.16413	1.0432	0.0172723	0.00295478	0.314684	4.4718	4.63004	4.69106	4.4794	4.40464	4.50895	4.49204	4.72874	4.56141	4.56159	4.66143	4.58823	4.76646	4.72117	4.68246	21.1261	20.0077	21.7706	21.596	25.4796	22.5429	22.7388	24.2945	23.2129	26.1057	25.4848	24.7999	2181	chr2	223725732	223808119	4361	+	NM_203372	protein_coding	ACS3|FACL3|PRO2194	P9957	acyl-CoA synthetase long-chain family member 3	ACSL3
204	ACSL4	0.984747	0.941596	0.956181	0.527497	0.0559055	0.0498515	5.61173	5.58956	5.52491	5.65339	5.55409	5.66833	5.56758	5.59059	5.58412	5.55411	5.62843	5.50544	5.58476	5.52265	5.48487	48.9245	45.6023	49.8608	46.6226	47.1212	46.8309	46.2363	48.4445	44.7321	46.7887	45.167	44.003	2182	chrX	108884564	108976621	5041	-	NM_022977	protein_coding	ACS4|FACL4|LACS4|MRX63|MRX68	P26514	acyl-CoA synthetase long-chain family member 4	ACSL4
205	ACSL5	0.986319	0.980434	0.994033	0.497362	0.435495	0.821197	5.17918	5.15931	5.15067	5.14485	5.16741	5.22618	5.17706	5.15181	5.10032	5.19409	5.18907	5.12357	5.08127	5.17839	5.21581	34.0934	34.6479	36.4352	35.3279	34.5019	33.2034	35.802	35.4636	34.0948	32.7098	35.3645	36.343	51703	chr10	114133916	114188138	3744	+	NM_203379	protein_coding	ACS2|ACS5|FACL5	P13750	acyl-CoA synthetase long-chain family member 5	ACSL5
206	ACSL6	1.0043	1.00499	1.0007	0.605595	0.547606	0.928248	0.0119658	0.0181495	0.0191537	0.0355925	0.011977	0	0	0.0233929	0.0131021	0.0358597	2.01445e-06	0	0.0321839	0.0300217	0.0141741	0.0245672	0.00814861	0	0	0.0162953	0.00905033	0.0254388	0	0	0.0223587	0.0212172	0.0100008	23305	chr5	131285667	131347761	6990	-	NM_001205247	protein_coding	ACS2|FACL6|FLJ16173|KIAA0837|LACS 6|LACS2|LACS5	P14756	acyl-CoA synthetase long-chain family member 6	ACSL6
207	ACSM1	1	1	1	1	1	1	0	0	0	0	0	0	0	0	0	0	0	0	0	0	0	0	0	0	0	0	0	0	0	0	0	0	0	116285	chr16	20634559	20702578	2051	-	NM_052956	protein_coding	BUCS1|MACS1|MGC150532	P25956	acyl-CoA synthetase medium-chain family member 1	ACSM1
208	ACSM2A	1	1	1	1	1	1	0	0	0	0	0	0	0	0	0	0	0	0	0	0	0	0	0	0	0	0	0	0	0	0	0	0	0	123876	chr16	20462783	20498991	3567	+	NM_001308954	protein_coding	A-923A4.1|ACSM2|FLJ34659|MGC150530	P32522	acyl-CoA synthetase medium-chain family member 2A	ACSM2A
209	ACSM2B	1	1	1	1	1	1	0	0	0	0	0	0	0	0	0	0	0	0	0	0	0	0	0	0	0	0	0	0	0	0	0	0	0	348158	chr16	20548083	20587695	2441	-	NM_001105069	protein_coding	ACSM2|HXMA	P8823	acyl-CoA synthetase medium-chain family member 2B	ACSM2B
210	ACSM3	0.973822	0.96379	0.989699	0.386973	0.358791	0.685549	0.0887017	0.0504312	0.0354924	0.0524486	0.108448	0	0.18721	0.052123	0.0576323	0.0537439	0.0381505	0	0.137013	0	0	0.0364137	0.0770876	0	0.139284	0.0366863	0.0405215	0.0383627	0.0267673	0	0.0990235	0	0	6296	chr16	20775312	20808479	2133	+	NM_202000	protein_coding	SA|SAH	P12974	acyl-CoA synthetase medium-chain family member 3	ACSM3
211	ACSM4	1.0018	1.01915	1.01731	0.937251	0.594845	0.632077	0.0342565	0.0368566	0.0616193	0.0915172	9.28039e-05	0	0.0434303	1.57891e-05	0.0512164	0.0940356	5.48168e-06	0	0.179626	0.0592946	0	0.0646357	0	0	0.0308264	0	0.0359289	0.0679234	0	0	0.131882	0.0422892	0	341392	chr12	7456928	7480969	1743	+	NM_001080454	protein_coding	.	P6408	acyl-CoA synthetase medium-chain family member 4	ACSM4
212	ACSM5	1	1	1	1	1	1	0	0	0	0	0	0	0	0	0	0	0	0	0	0	0	0	0	0	0	0	0	0	0	0	0	0	0	54988	chr16	20420856	20452281	2419	+	NM_017888	protein_coding	FLJ20581	P2933	acyl-CoA synthetase medium-chain family member 5	ACSM5
213	ACSM6	1	1	1	1	1	1	0	0	0	0	0	0	0	0	0	0	0	0	0	0	0	0	0	0	0	0	0	0	0	0	0	0	0	142827	chr10	96953957	96988686	1713	+	NM_207321	protein_coding	.	P18741	acyl-CoA synthetase medium-chain family member 6	ACSM6
214	ACSS1	1.02953	1.03181	1.00222	0.642759	0.575306	0.958639	0.838957	0.88094	0.884137	1.01917	0.853512	0.756032	0.70712	0.861537	0.979264	0.743895	0.928408	0.80598	0.8921	0.875171	0.959183	1.01825	0.799445	0.688926	0.635913	0.815696	0.968472	0.679167	0.902707	0.754255	0.851833	0.838199	0.94909	84532	chr20	24986866	25038818	3081	-	NM_001252677	protein_coding	ACAS2L|AceCS2L|FLJ45659|MGC33843	P29177	acyl-CoA synthetase short-chain family member 1	ACSS1
215	ACSS2	1.03001	0.98471	0.956018	0.545971	0.763358	0.330292	3.00625	3.04892	2.98403	2.93544	3.12673	2.89686	3.05425	3.13468	3.08853	3.01621	2.94936	2.96125	2.98851	2.8778	3.09977	6.59289	7.67173	6.44876	7.33762	7.77208	7.48396	7.12951	6.72066	6.83563	6.9058	6.37922	7.61015	55902	chr20	33462766	33515769	3193	+	NM_001242393	protein_coding	ACAS2|ACECS|ACS|ACSA|DKFZp762G026|dJ1161H23.1	P1950	acyl-CoA synthetase short-chain family member 2	ACSS2
216	ACSS3	0.93395	0.960473	1.0284	0.0405455	0.625383	0.751321	2.14939	2.05081	2.09121	2.13565	2.18751	2.13609	2.13763	2.12677	1.95582	2.02994	2.08505	2.07718	2.22257	2.27333	1.73238	3.36587	3.52601	3.39605	3.41498	3.36258	2.86998	3.10159	3.24125	3.24258	3.65161	3.85039	2.33653	79611	chr12	81471809	81649582	3033	+	NM_024560	protein_coding	FLJ21963	P22805	acyl-CoA synthetase short-chain family member 3	ACSS3
217	ACTA1	0.983557	1.00408	1.02087	0.595755	0.905973	0.49272	0.0828681	0.0589493	0.0887449	0.108588	0.0552943	0.162522	0	2.76958e-05	0.119415	0.0569343	0.0569455	0.0747454	0.144695	0	0.131071	0.0771546	0.0384114	0.119259	0	0	0.0859022	0.0406965	0.0402212	0.0538354	0.104853	0	0.0957975	58	chr1	229566993	229569843	1492	-	NM_001100	protein_coding	ACTA|ASMA|CFTD|CFTD1|CFTDM|MPFD|NEM1|NEM2|NEM3	P30994	actin, alpha 1, skeletal muscle	ACTA1
218	ACTA2	1.06944	1.22303	1.14362	0.535395	0.156402	0.214606	0.561022	0.657874	0.851486	0.827631	0.471952	0.178185	0.685307	0.773116	0.61888	0.485918	0.736308	1.14478	0.594021	0.772848	0.838524	0.768179	0.382409	0.131495	0.611008	0.70789	0.533721	0.40355	0.665549	1.21808	0.50668	0.71192	0.792214	59	chr10	90694831	90751147	1851	-	NM_001141945	protein_coding	AAT6|ACTSA	P21140	actin, alpha 2, smooth muscle, aorta	ACTA2
219	ACTA2-AS1	1.00722	0.994158	0.987032	0.842143	0.918849	0.828793	0.191553	0.201932	0.1831	0.114332	0.21853	0.255918	0.17358	0.149076	0.276404	0.116652	0.259065	0.152575	0.199524	0.357736	0	0.0812051	0.161691	0.194121	0.128683	0.108608	0.210392	0.0850609	0.196581	0.112789	0.147396	0.282741	0	100132116	chr10	90692441	90699731	2043	+	NR_125373	lncRNA	.	.	ACTA2 antisense RNA 1	ACTA2-AS1
220	ACTB	1.04225	1.0647	1.02154	0.0211842	0.0343113	0.333214	11.6928	11.7525	11.7833	11.692	11.6989	11.6469	11.7321	11.7521	11.7371	11.7438	11.7767	11.835	11.7357	11.7337	11.8254	3280.19	3295.89	3206.17	3415.35	3443.45	3402.49	3447.23	3505.87	3677.38	3394.62	3419.29	3646.19	60	chr7	5566779	5570232	1812	-	NM_001101	protein_coding	PS1TP5BP1	P5322	actin, beta	ACTB
221	ACTBL2	0.962302	0.988115	1.02682	0.124837	0.70033	0.371959	0.0989483	0.0435093	0.0816988	0.0553991	0.133485	0.0555658	0.14876	2.70123e-05	0.0606128	0.0835462	0.0284619	0.178932	0.0743294	0.0353177	0.0333061	0.0384871	0.0957826	0.039275	0.109254	0	0.0426559	0.0601825	0.0198982	0.133205	0.0524549	0.0250443	0.0236454	345651	chr5	56775843	56778636	2794	-	NM_001017992	protein_coding	ACT|DKFZp686D0972	P31012	actin, beta-like 2	ACTBL2
222	ACTC1	1.01366	1.05801	1.04375	0.226215	0.020406	0.0726903	0.0847669	0.104341	0.16612	0.101017	0.0811182	0.0816121	0.075189	0.0802525	0.131464	0.0824642	0.122446	0.134521	0.234412	0.127247	0.165794	0.0714817	0.0569236	0.0582115	0.0539481	0.0570482	0.0949588	0.0594345	0.0885097	0.0987589	0.175493	0.0928385	0.12264	70	chr15	35080297	35087927	3693	-	NM_005159	protein_coding	ACTC|ASD5|CMD1R|CMH11|LVNC4	P28706	actin, alpha, cardiac muscle 1	ACTC1
223	ACTG1	0.948391	0.967492	1.02014	0.0914396	0.18694	0.522842	11.0446	10.9682	10.9969	11.0218	11.0617	11.0051	11.0883	11.0305	10.8726	10.966	10.9988	11.0365	10.9198	11.0032	11.0254	2061.01	2118.85	2054.45	2185.57	2087.76	1868.26	2010.25	2044.32	2113.79	1927.8	2060.51	2093.76	71	chr17	79476997	79479892	2089	-	NR_037688	protein_coding	ACT|ACTG|DFNA20|DFNA26	.	actin gamma 1	ACTG1
224	ACTG1P17	1.00141	1.00991	1.0085	0.952556	0.7239	0.768074	0.0358268	0.0378526	0.050057	8.69805e-05	8.67136e-05	0.0500508	0.0910632	0.0491379	3.14585e-05	0.0998563	5.12193e-06	0.0666341	0.129551	0	0	0	0	0.0353085	0.0655879	0.0345518	0	0.0722588	0	0.0478349	0.0933888	0	0	283693	chr15	83394650	83408532	1652	-	NR_036446	misc_RNA	.	.	actin gamma 1 pseudogene 17	ACTG1P17
225	ACTG1P20	1.06496	1.0125	0.950736	0.377015	0.883619	0.558109	1.05373	1.14453	1.07165	1.09063	1.19374	0.872847	1.03924	1.05712	1.2237	1.28477	0.992996	0.96422	1.3243	1.05765	0.903559	1.11959	1.27666	0.831382	1.06012	1.0791	1.33145	1.44399	0.989759	0.958604	1.49792	1.08669	0.875962	644961	chr1	27650365	27653016	2652	+	NR_033926	misc_RNA	.	.	actin gamma 1 pseudogene 20	ACTG1P20
226	ACTG1P4	0.992918	1.01549	1.02273	0.764003	0.566899	0.223258	0.0307302	0.0204771	0.0529009	7.31757e-05	7.29512e-05	0.119044	0	0.0400583	2.64657e-05	0.0412468	4.30901e-06	0.0543466	0.0543462	0.101136	0	0	0	0.0860275	0	0.0280745	0	0.029322	0	0.0388718	0.0380811	0.0730863	0	648740	chr1	104112026	104114008	1983	+	NR_024438	misc_RNA	.	.	actin gamma 1 pseudogene 4	ACTG1P4
227	ACTG2	0.993397	1.07582	1.08298	0.86813	0.147605	0.170089	0.147311	0.137753	0.252753	0.0712856	0.2019	0.141417	0.17141	0.20329	0.000143164	0.210628	0.12717	0.271775	0.183605	0.394038	0.149049	0.0496953	0.148469	0.103006	0.126969	0.151023	0	0.158372	0.0920707	0.209027	0.134853	0.315465	0.109713	72	chr2	74120093	74146780	1331	+	NM_001615	protein_coding	ACT|ACTA3|ACTE|ACTL3|ACTSG	P23691	actin, gamma 2, smooth muscle, enteric	ACTG2
228	ACTL10	1.06927	0.994196	0.929793	0.407609	0.958932	0.413516	0.780685	0.877305	0.772286	0.659161	0.949745	0.943088	0.524515	0.950198	0.935002	0.798089	0.819614	0.809319	1.05782	0.58107	0.586667	0.57309	0.92375	0.922737	0.441156	0.930811	0.9091	0.74333	0.76452	0.758123	1.07734	0.498894	0.505169	170487	chr20	32254304	32256331	2028	+	NM_001024675	protein_coding	.	P29962	actin like 10	ACTL10
229	ACTL6A	0.994844	0.950793	0.955721	0.838336	0.0336509	0.0563003	6.17585	6.1684	6.10306	6.10601	6.1846	6.18976	6.22059	6.19701	6.09942	6.21525	6.15919	6.1127	6.08964	6.08364	6.12584	67.3148	71.1435	72.0041	73.885	72.2628	67.3622	73.6966	70.4318	68.6681	66.8093	67.1113	69.1773	86	chr3	179280668	179306193	1754	+	NM_177989	protein_coding	ACTL6|ARPN-BETA|Arp4|BAF53A|INO80K|MGC5382	P2640	actin like 6A	ACTL6A
230	ACTL6B	1	1	1	1	1	1	0	0	0	0	0	0	0	0	0	0	0	0	0	0	0	0	0	0	0	0	0	0	0	0	0	0	0	51412	chr7	100240726	100254084	1531	-	NM_016188	protein_coding	ACTL6|BAF53B	P16818	actin like 6B	ACTL6B
231	ACTL7A	0.975905	0.979241	1.00342	0.498258	0.580388	0.91728	0.0651486	0.0299607	0.0348847	9.12172e-05	0.154886	0	0.0994621	1.54716e-05	0.116262	0	5.37142e-06	0	4.77899e-05	0.134703	0	0	0.112118	0	0.0718355	0	0.0835598	0	0	0	0	0.0984454	0	10881	chr9	111624508	111626035	1528	+	NM_006687	protein_coding	.	P17012	actin like 7A	ACTL7A
232	ACTL7B	0.969805	0.982152	1.01273	0.175196	0.470922	0.355889	0.0442395	6.48429e-06	0.018257	4.39487e-05	4.38139e-05	0.11795	0.0556196	7.45418e-06	1.5895e-05	0	2.58794e-06	0	2.30252e-05	0	0.0716597	0	0	0.0852042	0.0395985	0	0	0	0	0	0	0	0.0513364	10880	chr9	111616869	111618275	1407	-	NM_006686	protein_coding	Tact1	P10340	actin like 7B	ACTL7B
233	ACTL8	1.00838	0.999998	0.991685	0.356048	0.288923	0.355935	4.15926e-06	0.0120472	1.09121e-06	8.33129e-06	8.30572e-06	0	0	1.41307e-06	0.0475948	0	4.90589e-07	0	4.36483e-06	0	0	0	0	0	0	0	0.0333644	0	0	0	0	0	0	81569	chr1	18081808	18153558	1861	+	NM_030812	protein_coding	CT57	P9423	actin like 8	ACTL8
234	ACTL9	1	1	1	1	1	1	0	0	0	0	0	0	0	0	0	0	0	0	0	0	0	0	0	0	0	0	0	0	0	0	0	0	0	284382	chr19	8807747	8809180	1434	-	NM_178525	protein_coding	MGC33407	P33057	actin like 9	ACTL9
235	ACTN1	0.936904	0.949614	1.01357	0.0971984	0.15532	0.720326	8.25876	8.16473	8.18417	8.19125	8.27708	8.23351	8.32954	8.22235	8.05026	8.17542	8.20472	8.1842	8.08757	8.20073	8.25897	288.873	306.651	300.008	322.053	297.238	263.28	289.671	293.886	291.847	269.839	294.486	306.856	87	chr14	69340840	69446083	3791	-	NM_001130005	protein_coding	FLJ40884|FLJ54432	P3535	actinin alpha 1	ACTN1
236	ACTN1-AS1	1.00114	0.969612	0.968511	0.980134	0.355792	0.355912	0.0445292	0.0461677	8.29425e-06	0.170364	6.31307e-05	0	0	0.176394	2.29029e-05	0	3.72894e-06	0	3.31767e-05	0	0	0.124067	0	0	0	0.129834	0	0	0	0	0	0	0	161159	chr14	69446399	69454180	599	+	NR_073422	lncRNA	.	.	ACTN1 antisense RNA 1	ACTN1-AS1
237	ACTN2	0.997586	1.00126	1.00368	0.570451	0.864411	0.616057	0.007425	0.00393826	0.00923454	1.43211e-05	0.0154371	0	0.0141724	2.42901e-06	5.17952e-06	0	0.0156814	0	7.50297e-06	0	0.0365814	0	0.0105469	0	0.00997343	0	0	0	0.0109162	0	0	0	0.025923	88	chr1	236849754	236927927	5110	+	NM_001278343	protein_coding	CMD1AA	P15513	actinin alpha 2	ACTN2
238	ACTN3	0.99126	0.997466	1.00626	0.355645	0.820938	0.356027	0.0126667	2.21391e-06	0.00900643	1.50054e-05	1.49593e-05	0.049984	0	2.54506e-06	5.42699e-06	0	8.83593e-07	0	0.0356932	0	0	0	0	0.0352599	0	0	0	0	0	0	0.024841	0	0	89	chr11	66313866	66330800	3331	+	NM_001258371	protein_coding	MGC117002|MGC117005	P29802	actinin alpha 3 (gene/pseudogene)	ACTN3
239	ACTN4	0.97153	0.976033	1.00464	0.300027	0.530086	0.892457	8.3651	8.32343	8.3301	8.30821	8.39852	8.31696	8.43282	8.37809	8.28815	8.32209	8.30379	8.39056	8.20468	8.3267	8.39061	313.349	333.668	317.933	346.028	331.235	310.658	320.778	314.848	336.877	292.74	321.448	336.27	81	chr19	39138267	39221171	3954	+	NM_004924	protein_coding	ACTININ-4|DKFZp686K23158|FSGS|FSGS1	P5331	actinin alpha 4	ACTN4
240	ACTR10	1.02492	0.985772	0.961809	0.582944	0.731965	0.291335	4.74549	4.781	4.72482	4.72485	4.62902	4.86435	4.75397	4.7457	4.8378	4.68908	4.84553	4.80477	4.72816	4.70159	4.66092	25.2313	23.544	28.1313	26.0934	25.792	27.5149	24.9329	27.7374	27.1334	25.3928	25.1303	24.4205	55860	chr14	58666833	58702353	2441	+	NM_018477	protein_coding	ACTR11|Arp11|HARP11	P30740	actin-related protein 10 homolog	ACTR10
241	ACTR1A	1.02955	1.05964	1.02923	0.236324	0.0957527	0.315425	6.04039	6.08241	6.12397	6.03345	6.09299	5.96918	6.06305	6.11403	6.08718	6.09836	6.02864	6.20378	6.05812	6.08375	6.14579	63.964	66.7047	61.654	66.1395	68.1675	66.7852	67.8837	64.2514	73.2035	65.3446	67.1151	70.1523	10121	chr10	104238986	104262512	2873	-	NM_005736	protein_coding	ARP1|CTRN1|FLJ52695|FLJ52800|FLJ55002	P36064	ARP1 actin-related protein 1 homolog A, centractin alpha	ACTR1A
242	ACTR1B	1.00061	0.984705	0.984108	0.989664	0.774927	0.719884	4.96983	4.9707	4.94759	4.89976	5.0957	4.85805	5.01359	5.05339	4.88118	4.97893	4.96414	4.98951	4.8175	4.91724	5.05537	28.6102	32.9238	28.0044	31.4353	32.1615	28.3835	30.7027	30.1995	30.9784	27.0769	29.3436	32.4114	10120	chr2	98272402	98280561	2258	-	NM_005735	protein_coding	ARP1B|CTRN2|PC3	P9065	ARP1 actin-related protein 1 homolog B, centractin beta	ACTR1B
243	ACTR2	1.03182	1.00426	0.973286	0.23207	0.867845	0.259685	6.80326	6.84845	6.80939	6.72932	6.79552	6.84975	6.83545	6.891	6.78898	6.86074	6.8512	6.7655	6.77985	6.86764	6.82237	104.227	109.173	114.352	113.683	117.52	109.253	115.85	114.4	108.537	108.41	116.28	112.731	10097	chr2	65454829	65498390	3937	+	NM_005722	protein_coding	ARP2	P17927	ARP2 actin-related protein 2 homolog (yeast)	ACTR2
244	ACTR3	1.03183	0.975484	0.945388	0.0873111	0.266104	0.0237734	5.81369	5.8589	5.77788	5.81934	5.77606	5.85823	5.79987	5.82671	5.84487	5.88503	5.8782	5.80844	5.79885	5.79596	5.7059	55.0065	53.3514	57.016	54.9432	55.6778	56.3057	58.4133	57.7905	55.4195	54.4324	54.7968	51.4549	10096	chr2	114647511	114719129	5881	+	NM_005721	protein_coding	ARP3	P9849	ARP3 actin-related protein 3 homolog (yeast)	ACTR3
245	ACTR3B	0.907446	0.921096	1.01504	0.187149	0.370185	0.877321	2.80514	2.66502	2.68657	2.69195	2.74648	2.80932	2.95882	2.60708	2.87145	2.60075	2.55895	2.77407	2.69079	2.88394	2.34269	5.41548	5.66324	6.01019	6.80212	5.08517	6.29957	5.09513	4.89024	5.88024	5.43238	6.40841	4.09577	57180	chr7	152456834	152552464	2217	+	NM_001040135	protein_coding	ARP11|ARP3BETA|DKFZp686O24114	P30912	ARP3 actin-related protein 3 homolog B (yeast)	ACTR3B
246	ACTR3BP2	1	1	1	1	1	1	0	0	0	0	0	0	0	0	0	0	0	0	0	0	0	0	0	0	0	0	0	0	0	0	0	0	0	440888	chr2	92129159	92130496	1338	+	NR_027714	misc_RNA	FKSG73	.	ACTR3B pseudogene 2	ACTR3BP2
247	ACTR3BP5	1	1	1	1	1	1	0	0	0	0	0	0	0	0	0	0	0	0	0	0	0	0	0	0	0	0	0	0	0	0	0	0	0	399746	chr10	38989727	38991371	1645	+	NR_045000	misc_RNA	FKSG74	.	ACTR3B pseudogene 5	ACTR3BP5
248	ACTR3C	1.02198	1.02934	1.0072	0.780973	0.72775	0.911204	0.389362	0.420736	0.431088	0.318785	0.528115	0.139103	0.53477	0.42975	0.549963	0.26998	0.419647	0.534292	0.394521	0.534728	0.240735	0.244355	0.438065	0.101244	0.45077	0.346406	0.462564	0.207542	0.337397	0.451544	0.312765	0.45077	0.183096	653857	chr7	149944301	150020758	1420	-	NM_001164459	protein_coding	ARP11	P31889	ARP3 actin-related protein 3 homolog C	ACTR3C
249	ACTR5	0.986145	1.01193	1.02614	0.533316	0.771882	0.480459	3.38622	3.36609	3.40332	3.38263	3.31451	3.45669	3.38754	3.37464	3.3413	3.36786	3.38024	3.39161	3.30752	3.5322	3.37255	9.35077	8.87277	9.98012	9.50583	9.35879	9.10723	9.37504	9.40782	9.56027	8.86085	10.6137	9.40429	79913	chr20	37377097	37401089	2479	+	NM_024855	protein_coding	Arp5|FLJ12785|INO80M	P1913	ARP5 actin-related protein 5 homolog	ACTR5
250	ACTR6	1.00424	0.889811	0.886056	0.893675	0.0242257	0.0162086	3.97713	3.98323	3.8087	3.9299	3.9601	4.07295	3.941	3.9373	3.99295	3.94257	4.05687	3.76602	3.77537	3.94003	3.74483	14.1225	14.4433	15.8315	14.42	14.2993	14.8775	14.4542	15.6358	12.6941	12.6358	14.4109	12.4707	64431	chr12	100593865	100618202	2608	+	NM_022496	protein_coding	ARP6|FLJ13433|HSPC281|MSTP136|hARP6|hARPX	P31955	ARP6 actin-related protein 6 homolog	ACTR6
251	ACTR8	0.976062	0.979035	1.00305	0.573306	0.322295	0.938152	3.94033	3.90538	3.90976	3.8726	3.98283	3.97908	3.924	4.05453	3.85228	3.82845	3.87495	3.89656	3.91345	3.93895	3.88958	13.5328	14.689	14.7712	14.2395	15.5948	13.4017	13.28	13.6648	13.989	14.0068	14.3993	13.8908	93973	chr3	53901094	53916229	3628	-	NM_022899	protein_coding	ARP8|FLJ12934|FLJ22579|INO80N	P8541	ARP8 actin-related protein 8 homolog	ACTR8
252	ACTRT1	1	1	1	1	1	1	0	0	0	0	0	0	0	0	0	0	0	0	0	0	0	0	0	0	0	0	0	0	0	0	0	0	0	139741	chrX	127184941	127186382	1442	-	NM_138289	protein_coding	AIP1|ARIP1|ARPT1|HSD27|KIAA0705|MGC26590	P15418	actin related protein T1	ACTRT1
253	ACTRT2	1	1	1	1	1	1	0	0	0	0	0	0	0	0	0	0	0	0	0	0	0	0	0	0	0	0	0	0	0	0	0	0	0	140625	chr1	2938046	2939467	1422	+	NM_080431	protein_coding	ARPM2|ARPT2|Arp-T2|FLJ25424|HARPM2	P21755	actin related protein T2	ACTRT2
254	ACTRT3	1.04494	0.945733	0.90506	0.626718	0.595034	0.191687	1.05147	1.11489	0.970979	0.921494	0.980509	1.35576	0.898422	1.24007	1.11849	1.10643	0.983127	1.07493	0.717307	0.952202	1.10778	0.885363	0.96408	1.55947	0.86841	1.36024	1.16756	1.15968	0.976207	1.11466	0.640243	0.939485	1.16113	84517	chr3	169484711	169487683	2003	-	NM_032487	protein_coding	.	P28215	actin related protein T3	ACTRT3
255	ACVR1	0.936181	1.01849	1.08792	0.264282	0.750567	0.304458	2.97942	2.88428	3.00586	2.99888	2.9443	3.02665	2.94614	2.97194	3.03309	2.68605	2.821	3.06938	3.1244	2.76562	3.03831	6.93576	6.64075	7.14991	6.73578	6.83619	7.16423	5.46797	6.06342	7.44379	7.68792	5.82732	7.2509	90	chr2	158592958	158732374	3112	-	NM_001111067	protein_coding	ACTRI|ACVR1A|ACVRLK2|ALK2|FOP|SKR1|TSRI	P29591	activin A receptor type 1	ACVR1
256	ACVR1B	1.09613	1.15358	1.05241	0.0105819	0.025046	0.289196	2.4974	2.62982	2.70352	2.52527	2.53978	2.4022	2.51823	2.68616	2.62509	2.60361	2.60282	2.64864	2.6947	2.86127	2.59553	4.71556	4.77358	4.28657	4.74982	5.42838	5.1535	5.10629	5.07218	5.30702	5.45058	6.29216	5.06982	91	chr12	52345451	52390863	4807	+	NM_004302	protein_coding	ACTRIB|ACVRLK4|ALK4|SKR2	P13009	activin A receptor type 1B	ACVR1B
257	ACVR1C	1.00006	1.00589	1.00583	0.995763	0.637837	0.646055	0.060479	0.0605641	0.0689524	0.0353992	0.0608881	0.0577735	0.0873834	0.0805061	0.0290492	0.0702406	0.061947	0.0469315	0.0910953	0.0443778	0.0926628	0.0243581	0.0424292	0.0408665	0.0628823	0.0572503	0.0201846	0.0503828	0.043833	0.0335408	0.0647145	0.0315291	0.0668741	130399	chr2	158383279	158485399	9077	-	NM_001111032	protein_coding	ACVRLK7|ALK7	P16651	activin A receptor type 1C	ACVR1C
258	ACVR2A	0.977412	0.966058	0.988383	0.419347	0.287355	0.673928	1.6619	1.62894	1.61209	1.57869	1.65252	1.71332	1.69928	1.61826	1.68982	1.62706	1.57842	1.53333	1.67853	1.63236	1.60026	1.96939	2.12553	2.27939	2.25703	2.06699	2.21937	2.10072	1.98538	1.90867	2.19125	2.10968	2.04269	92	chr2	148602086	148688396	5722	+	NM_001278580	protein_coding	ACTRII|ACVR2	P5320	activin A receptor type 2A	ACVR2A
259	ACVR2B	1.0235	1.01774	0.994377	0.249242	0.554409	0.863241	1.90744	1.94095	1.93282	1.92149	1.92331	1.87514	1.90931	1.8949	2.00458	1.94111	1.92093	1.87597	1.98917	1.85387	2.00602	2.76425	2.76909	2.66867	2.76844	2.71497	3.00366	2.85588	2.78526	2.68969	2.9571	2.62672	3.03176	93	chr3	38495790	38534633	11373	+	NM_001106	protein_coding	ACTRIIB|ActR-IIB|MGC116908	P25463	activin A receptor type 2B	ACVR2B
260	ACVR2B-AS1	1.09152	1.00556	0.921246	0.201984	0.928549	0.0810937	0.40427	0.530613	0.412272	0.335247	0.257815	0.387418	0.61199	0.45109	0.468384	0.640712	0.554286	0.438479	0.306063	0.446628	0.452873	0.258483	0.192991	0.308093	0.530681	0.366441	0.382181	0.562166	0.468192	0.358185	0.234781	0.364781	0.371001	100128640	chr3	38492518	38496311	2517	-	NR_028389	lncRNA	.	.	ACVR2B antisense RNA 1	ACVR2B-AS1
261	ACVRL1	1.02015	1.01361	0.993588	0.512288	0.61621	0.830668	0.0495592	0.0783473	0.0690667	0.124509	0.018621	0.0185355	0.0338443	0.0362485	0.0203425	0.0914735	0.161087	0.0969274	0.0251113	0.0233444	0.128012	0.0890443	0.0126596	0.0129349	0.023979	0.02536	0.0140735	0.066044	0.118053	0.0702566	0.0173509	0.0165111	0.093455	94	chr12	52301202	52317145	4470	+	NM_000020	protein_coding	ACVRLK1|ALK-1|ALK1|HHT|HHT2|ORW2|SKR3|TSR-I	P7544	activin A receptor like type 1	ACVRL1
262	ACY1	0.993858	0.945546	0.951389	0.844667	0.215712	0.207663	4.38665	4.37776	4.30587	4.27608	4.41817	4.40322	4.44342	4.44055	4.37239	4.32824	4.36759	4.40071	4.17733	4.33132	4.30514	18.2193	20.2122	20.1614	20.8445	20.685	19.6526	19.1928	19.6335	20.2598	17.0157	19.2142	18.8634	95	chr3	52017300	52023218	1689	+	NM_001198895	protein_coding	ACY1D|ACYLASE	P20283	aminoacylase 1	ACY1
263	ACY3	1.01189	0.999997	0.988249	0.356012	0.288923	0.355897	5.97998e-06	0.0170545	1.56889e-06	1.19783e-05	1.19416e-05	0	0	2.03164e-06	4.3322e-06	0.0670338	7.05345e-07	0	6.27554e-06	0	0	0	0	0	0	0	0	0.0479736	0	0	0	0	0	91703	chr11	67410026	67418130	1300	-	NM_080658	protein_coding	ACY-3|HCBP1|MGC9740	P31835	aminoacylase 3	ACY3
264	ACYP1	1.00844	0.934726	0.926908	0.950998	0.589045	0.575547	4.48142	4.49354	4.38403	4.08849	4.49461	4.70879	4.56347	4.73384	4.18162	4.70508	4.26797	4.46209	3.99017	4.5289	4.49198	15.8705	21.3654	25.1535	22.7401	25.5742	17.0925	25.2161	18.2565	21.1848	14.821	22.1802	21.609	97	chr14	75519928	75536186	1054	-	NR_126393	protein_coding	ACYPE	.	acylphosphatase 1	ACYP1
265	ACYP2	1.0711	0.985112	0.919724	0.519191	0.844323	0.33604	2.6523	2.75139	2.63066	2.89423	2.43492	2.66671	2.57415	2.68598	3.02577	2.70155	2.54851	2.55624	2.62781	2.72806	2.60507	6.38362	4.36734	5.35037	4.97727	5.42743	7.12447	5.53528	4.84777	4.91698	5.15764	5.65002	5.11053	98	chr2	54342410	54532435	1222	+	NM_138448	protein_coding	ACYM|ACYP	P27368	acylphosphatase 2	ACYP2
266	ADA	0.88688	0.820233	0.924852	0.132258	0.0289186	0.0930417	1.54462	1.37143	1.25872	1.77095	1.50638	1.49119	1.3808	1.37074	1.43994	1.24623	1.42102	1.26216	1.15522	1.33005	1.28186	2.39502	1.82578	1.81139	1.61135	1.58364	1.7078	1.38074	1.67689	1.40936	1.22077	1.52126	1.4395	100	chr20	43248163	43280376	1404	-	NM_000022	protein_coding	.	P33308	adenosine deaminase	ADA
267	ADAD1	1	1	1	1	1	1	0	0	0	0	0	0	0	0	0	0	0	0	0	0	0	0	0	0	0	0	0	0	0	0	0	0	0	132612	chr4	123300121	123350947	2445	+	NM_139243	protein_coding	FLJ32741|Tenr	P24245	adenosine deaminase domain containing 1	ADAD1
268	ADAD2	1	1	1	1	1	1	0	0	0	0	0	0	0	0	0	0	0	0	0	0	0	0	0	0	0	0	0	0	0	0	0	0	0	161931	chr16	84224723	84230772	2455	+	NM_139174	protein_coding	FLJ00337|TENRL	P29649	adenosine deaminase domain containing 2	ADAD2
269	ADAL	1.05683	1.00798	0.953781	0.209278	0.898594	0.444896	2.04557	2.12531	2.05704	2.14221	2.08217	1.96902	1.98171	2.11577	2.21041	2.14544	2.02336	2.19864	2.14551	2.00252	1.8573	3.38601	3.20704	2.91536	2.96295	3.32946	3.61743	3.44295	3.06373	3.61456	3.40959	3.02077	2.63793	161823	chr15	43622554	43646753	4570	+	NM_001012969	protein_coding	DKFZp313B2137|FLJ44620	P5678	adenosine deaminase-like	ADAL
270	ADAM10	1.00619	1.03364	1.02728	0.856923	0.308551	0.24138	4.76693	4.77583	4.81466	4.73583	4.6836	4.8718	4.76987	4.82011	4.74257	4.72202	4.81598	4.77395	4.80502	4.82662	4.8519	25.431	24.4906	28.2821	26.3941	27.2104	25.6923	25.5319	27.1547	26.5403	26.8375	27.4948	28.0161	102	chr15	58887403	59042177	5034	-	NM_001110	protein_coding	AD10|CD156c|HsT18717|MADM|kuz	P32644	ADAM metallopeptidase domain 10	ADAM10
271	ADAM11	0.980492	0.984344	1.00393	0.527541	0.772591	0.938763	0.288465	0.260043	0.265699	0.268279	0.390139	0.240313	0.250016	0.236398	0.212308	0.316194	0.273131	0.370711	0.27747	0.334343	0.0607585	0.202068	0.307623	0.181276	0.19035	0.177685	0.157814	0.246715	0.20829	0.295307	0.210835	0.262179	0.0436436	4185	chr17	42836568	42859214	4402	+	NM_002390	protein_coding	MDC	P11603	ADAM metallopeptidase domain 11	ADAM11
272	ADAM12	0.977557	0.97186	0.994172	0.335266	0.44355	0.884637	0.290149	0.257401	0.248969	0.255465	0.286928	0.288085	0.329166	0.33764	0.226426	0.234963	0.227491	0.220632	0.155916	0.229393	0.380414	0.191498	0.217663	0.221049	0.257615	0.26324	0.169184	0.178267	0.170675	0.166924	0.113253	0.173431	0.303423	8038	chr10	127700954	128077127	9010	-	NM_001288973	protein_coding	MCMP|MCMPMltna|MLTN|MLTNA	P26203	ADAM metallopeptidase domain 12	ADAM12
273	ADAM15	1.05135	1.09804	1.04441	0.147755	0.0328221	0.16551	5.95548	6.02772	6.09041	6.02898	5.95411	5.85018	5.98274	6.05728	6.02553	6.06418	5.96164	6.06399	6.09149	6.02666	6.17531	63.7649	60.4888	56.6933	62.5045	65.4997	63.9498	66.2705	61.2907	66.3528	66.8988	64.4721	71.6216	8751	chr1	155023748	155035252	3219	+	NM_001261465	protein_coding	MDC15	P6232	ADAM metallopeptidase domain 15	ADAM15
274	ADAM17	0.971436	1.00229	1.03176	0.188706	0.920313	0.0961787	4.10473	4.06292	4.10803	4.11218	4.03156	4.15014	4.12237	4.06565	4.08687	4.0287	4.06983	4.12894	4.05012	4.13318	4.11832	16.1584	15.2248	16.7566	16.486	15.7225	15.9447	15.4065	15.7857	16.6085	15.497	16.6189	16.4491	6868	chr2	9629411	9695917	3553	-	NM_003183	protein_coding	ADAM18|CD156B|CSVP|MGC71942|TACE	P6043	ADAM metallopeptidase domain 17	ADAM17
275	ADAM18	1	1	1	1	1	1	0	0	0	0	0	0	0	0	0	0	0	0	0	0	0	0	0	0	0	0	0	0	0	0	0	0	0	8749	chr8	39442087	39587583	2399	+	NM_014237	protein_coding	ADAM27|MGC41836|MGC88272|tMDCIII	P4966	ADAM metallopeptidase domain 18	ADAM18
276	ADAM19	0.782376	0.780852	0.998052	3.89255e-05	0.000127534	0.955693	3.67976	3.32569	3.32288	3.6281	3.70117	3.67239	3.71583	3.2999	3.29752	3.2941	3.40801	3.20613	3.36601	3.32617	3.38653	11.2729	11.9119	11.7509	12.1884	8.83543	8.8045	8.8593	9.61004	8.289	9.26862	9.07013	9.50621	8728	chr5	156904312	157002831	6529	-	NM_033274	protein_coding	MADDAM|MLTNB	P30964	ADAM metallopeptidase domain 19	ADAM19
277	ADAM1A	0.99903	1.02537	1.02636	0.991444	0.797242	0.712079	1.35512	1.35372	1.39126	1.07598	1.61717	1.34667	1.32976	1.30831	1.51072	1.24557	1.33665	1.20065	1.43752	1.56573	1.3363	1.09671	2.05172	1.54341	1.52052	1.47425	1.84406	1.37954	1.52484	1.30869	1.70098	1.96841	1.53317	8759	chr12	112336867	112339706	2840	+	NR_036636	misc_RNA	.	.	ADAM metallopeptidase domain 1A (pseudogene)	ADAM1A
278	ADAM2	1	1	1	1	1	1	0	0	0	0	0	0	0	0	0	0	0	0	0	0	0	0	0	0	0	0	0	0	0	0	0	0	0	2515	chr8	39601255	39695808	2772	-	NM_001464	protein_coding	CRYN1|CRYN2|CT15|FTNB|PH-30b|PH30	P32331	ADAM metallopeptidase domain 2	ADAM2
279	ADAM20	1.01074	0.978145	0.967749	0.531995	0.158207	0.038087	0.0408191	0.0562348	0.00893915	0.0280505	7.42381e-05	0.0826324	0.0512435	0.0811901	0.0306731	0.0283259	0.0837751	0	3.9014e-05	0.0353909	0	0.0192584	0	0.0589584	0.0364463	0.0577591	0.0213444	0.0200765	0.059741	0	0	0.0250637	0	8748	chr14	70989078	71001732	2792	-	NM_003814	protein_coding	.	P4045	ADAM metallopeptidase domain 20	ADAM20
280	ADAM20P1	1.01023	1.02019	1.00986	0.2688	0.322054	0.626231	0.037254	0.0519344	0.0660932	0.0507369	0.0255965	0.0256589	0.046835	0.0743511	0.0555169	0.0258542	0.0516015	0.0678081	0.0681487	0.125675	0	0.0352074	0.0175238	0.0179493	0.0332813	0.0527591	0.039006	0.018333	0.0363798	0.0487087	0.0479968	0.0915784	0	317760	chr14	70935596	70950473	3036	-	NR_037933	misc_RNA	.	.	ADAM metallopeptidase domain 20 pseudogene 1	ADAM20P1
281	ADAM21	1.02158	0.993051	0.972074	0.252105	0.55875	0.139569	0.0294036	0.060204	0.0193427	0.0581511	0.0293503	0.0295272	0	0.0853117	0.0944811	0.0591496	4.48922e-06	0	0.039635	0.037223	0	0.0405144	0.0201658	0.0206825	0	0.0607809	0.0673703	0.0422613	0	0	0.0276048	0.0263746	0	8747	chr14	70918874	70926622	2664	+	NM_003813	protein_coding	ADAM 21|ADAM31|MGC125389	P25095	ADAM metallopeptidase domain 21	ADAM21
282	ADAM21P1	1.00711	1.00187	0.9948	0.662528	0.870935	0.7603	0.0098618	0.0200788	0.0125571	0.0390203	2.95424e-05	0	0	5.02611e-06	1.07175e-05	0.0786744	1.74497e-06	0	1.55252e-05	0.0495706	0	0.0269807	0	0	0	0	0	0.0565205	0	0	0	0.0352269	0	145241	chr14	70712470	70714518	2049	-	NR_003951	misc_RNA	ADAM21P	.	ADAM metallopeptidase domain 21 pseudogene 1	ADAM21P1
283	ADAM22	0.99838	1.00823	1.00986	0.984245	0.923308	0.923962	1.03179	1.02945	1.04361	1.0126	0.906619	1.17888	1.01581	1.27112	0.82601	1.05636	0.925273	1.02974	1.05955	0.766245	1.27426	1.00827	0.866115	1.26414	1.0268	1.41161	0.769868	1.08597	0.898531	1.04939	1.07926	0.704831	1.42541	53616	chr7	87563566	87832204	9421	+	NM_021721	protein_coding	MDC2|MGC149832	P4973	ADAM metallopeptidase domain 22	ADAM22
284	ADAM23	0.989345	0.978889	0.989431	0.647775	0.129363	0.608654	0.136188	0.120735	0.105406	0.116457	0.180868	0.138778	0.107533	0.0924486	0.186577	0.140382	0.0603493	0.0945564	0.110797	0.118146	0.0979968	0.0829223	0.132059	0.100988	0.0779432	0.066009	0.137502	0.103044	0.0426725	0.0685699	0.0792416	0.0859441	0.0709064	8745	chr2	207308368	207485854	6225	+	NM_003812	protein_coding	MDC3	P3144	ADAM metallopeptidase domain 23	ADAM23
285	ADAM28	0.932664	0.983581	1.05459	0.250062	0.721823	0.167087	0.276637	0.176066	0.252753	0.16095	0.216753	0.440674	0.272734	0.139396	0.120398	0.122982	0.312357	0.241158	0.255152	0.223543	0.290323	0.116385	0.160172	0.357277	0.209242	0.101187	0.0865301	0.089911	0.241591	0.183654	0.192334	0.168635	0.224313	10863	chr8	24151553	24216531	7186	+	NM_001304351	protein_coding	ADAM 28|ADAM23|MDC-L|MDC-Lm|MDC-Ls|MDCL|eMDC II|eMDCII	P14067	ADAM metallopeptidase domain 28	ADAM28
286	ADAM29	1.00455	0.999999	0.995472	0.356028	0.288923	0.355915	2.26201e-06	0.0065483	5.93453e-07	4.53096e-06	4.51706e-06	0	0	0.0260148	1.63871e-06	0	2.66806e-07	0	2.37381e-06	0	0	0	0	0	0	0.0181437	0	0	0	0	0	0	0	11086	chr4	175839509	175899331	3440	+	NM_001278126	protein_coding	CT73|svph1	P15705	ADAM metallopeptidase domain 29	ADAM29
287	ADAM30	0.995494	0.995494	1	0.355861	0.355856	0.917453	0.00651586	6.55826e-07	5.82199e-07	4.44504e-06	0.0258843	0	0	7.53922e-07	1.60764e-06	0	2.61746e-07	0	2.32879e-06	0	0	0	0.0177996	0	0	0	0	0	0	0	0	0	0	11085	chr1	120436156	120439147	2992	-	NM_021794	protein_coding	svph4	P25435	ADAM metallopeptidase domain 30	ADAM30
288	ADAM32	1.01654	0.993848	0.977676	0.703022	0.868408	0.621466	0.154293	0.177962	0.145391	0.163516	0.0567738	0.215713	0.17642	0.109972	0.312272	0.113173	0.166928	0.217407	0.183251	0.140306	0.0340743	0.118518	0.0393275	0.1613	0.130878	0.0790068	0.240847	0.0823932	0.122576	0.164112	0.134599	0.102851	0.024278	203102	chr8	38965050	39142436	2727	+	NM_145004	protein_coding	FLJ26299|FLJ29004	P30713	ADAM metallopeptidase domain 32	ADAM32
289	ADAM33	0.999999	1.00462	1.00462	0.284073	0.356019	0.355909	2.32541e-06	6.8724e-07	0.00664564	4.65796e-06	4.64366e-06	0	0	7.90034e-07	1.68464e-06	0	2.74284e-07	0	2.44034e-06	0	0.0263984	0	0	0	0	0	0	0	0	0	0	0	0.0186523	80332	chr20	3648620	3662778	3556	-	NM_001282447	protein_coding	C20orf153|DJ964F7.1|DKFZp434K0521|FLJ35308|FLJ36751|MGC149823|MGC71889	P34570	ADAM metallopeptidase domain 33	ADAM33
290	ADAM3A	0.994564	0.994564	1	0.355862	0.355856	0.917453	0.00786456	7.92473e-07	7.03504e-07	0.031199	5.35472e-06	0	0	9.11007e-07	1.9426e-06	0	3.16283e-07	0	2.81402e-06	0	0	0.0215087	0	0	0	0	0	0	0	0	0	0	0	1587	chr8	39308564	39380508	2671	-	NR_073423	misc_RNA	ADAM3|CYRN1|tMDCI	.	ADAM metallopeptidase domain 3A (pseudogene)	ADAM3A
291	ADAM5	1.00862	0.999998	0.991447	0.356012	0.288923	0.355897	4.34248e-06	0.0123941	1.13928e-06	8.6983e-06	8.6716e-06	0	0	1.47532e-06	3.14591e-06	0.0489452	5.122e-07	0	4.55711e-06	0	0	0	0	0	0	0	0	0.0348345	0	0	0	0	0	255926	chr8	39172182	39260375	1705	+	NR_001448	misc_RNA	.	.	ADAM metallopeptidase domain 5 (pseudogene)	ADAM5
292	ADAM6	1	1	1	1	1	1	0	0	0	0	0	0	0	0	0	0	0	0	0	0	0	0	0	0	0	0	0	0	0	0	0	0	0	8755	chr14	106435818	106438358	1843	-	NR_002224	misc_RNA	C14orf96|tMDCIV	.	ADAM metallopeptidase domain 6 (pseudogene)	ADAM6
293	ADAM7	0.996041	0.996041	1	0.355862	0.355857	0.917453	0.00572399	5.75647e-07	5.11021e-07	0.0227571	3.88963e-06	0	0	6.6175e-07	1.41109e-06	0	2.29746e-07	0	2.04408e-06	0	0	0.0156233	0	0	0	0	0	0	0	0	0	0	0	8756	chr8	24298509	24367077	3396	+	NM_003817	protein_coding	EAPI|GP-83	P1405	ADAM metallopeptidase domain 7	ADAM7
294	ADAM8	0.905849	0.911997	1.00679	0.0412674	0.0961592	0.828455	5.47209	5.32943	5.33919	5.61516	5.39264	5.41297	5.45682	5.3399	5.33939	5.30145	5.33662	5.39984	5.35268	5.21148	5.38517	47.6251	40.6699	41.61	43.1018	39.4455	39.3678	38.6479	39.3901	41.5015	39.6877	36.2113	40.9961	101	chr10	135075920	135090407	3236	-	NM_001109	protein_coding	CD156|MGC134985|MS2	P23125	ADAM metallopeptidase domain 8	ADAM8
295	ADAM9	1.01715	1.01795	1.00078	0.32964	0.469322	0.968702	6.50155	6.52609	6.52721	6.52876	6.43812	6.52564	6.51181	6.55184	6.51101	6.50983	6.53126	6.45145	6.55247	6.56865	6.53349	90.5744	84.9975	91.1424	90.6372	92.6901	89.9321	90.6205	91.4472	87.1089	92.4584	94.3268	92.092	8754	chr8	38854505	38962779	4098	+	NM_003816	protein_coding	CORD9|KIAA0021|MCMP|MDC9|Mltng	P29528	ADAM metallopeptidase domain 9	ADAM9
296	ADAMDEC1	1	1	1	1	1	1	0	0	0	0	0	0	0	0	0	0	0	0	0	0	0	0	0	0	0	0	0	0	0	0	0	0	0	27299	chr8	24241798	24263526	2438	+	NM_001145271	protein_coding	FLJ79219|M12.219	P5466	ADAM-like, decysin 1	ADAMDEC1
297	ADAMTS1	0.284799	0.237636	0.834399	4.57183e-10	3.88784e-10	0.000124322	6.68324	4.87126	4.61007	6.65987	6.7041	6.70827	6.65998	4.86157	4.84046	4.91811	4.86374	4.59163	4.59544	4.56673	4.68372	99.3373	102.465	103.576	100.523	28.0292	27.5594	29.4066	28.1011	23.289	23.0616	22.8097	24.8373	9510	chr21	28208606	28217728	4651	-	NM_006988	protein_coding	C3-C5|KIAA1346|METH1	P4724	ADAM metallopeptidase with thrombospondin type 1 motif 1	ADAMTS1
298	ADAMTS10	1	1	1	1	1	1	0	0	0	0	0	0	0	0	0	0	0	0	0	0	0	0	0	0	0	0	0	0	0	0	0	0	0	81794	chr19	8645124	8675620	4260	-	NM_030957	protein_coding	ADAM-TS10|WMS	P12360	ADAM metallopeptidase with thrombospondin type 1 motif 10	ADAMTS10
299	ADAMTS12	0.850196	0.90644	1.06615	0.00503025	0.0571587	0.0625159	3.37867	3.14454	3.23695	3.31814	3.51287	3.35673	3.31783	3.18108	3.11622	3.16926	3.11023	3.13283	3.28637	3.23846	3.28483	8.89973	10.3333	9.2451	9.00954	8.05818	7.64702	8.04086	7.63129	7.82696	8.7184	8.47493	8.78981	81792	chr5	33527287	33892124	4954	-	NM_030955	protein_coding	PRO4389	P32876	ADAM metallopeptidase with thrombospondin type 1 motif 12	ADAMTS12
300	ADAMTS13	0.999709	1.00511	1.0054	0.98987	0.766084	0.7991	0.0262201	0.0257995	0.0335725	5.97541e-05	5.95707e-05	0.0793131	0.0239855	1.0135e-05	0.100528	0	3.51866e-06	0	0.0694563	0.0329166	0.0310771	0	0	0.0565244	0.0169322	0	0.0718459	0	0	0	0.0489631	0.0232909	0.0220097	11093	chr9	136279459	136324525	5159	+	NR_024514	protein_coding	C9orf8|DKFZp434C2322|FLJ42993|MGC118899|MGC118900|TTP|VWFCP|vWF-CP	.	ADAM metallopeptidase with thrombospondin type 1 motif 13	ADAMTS13
301	ADAMTS14	0.99804	1.03147	1.0335	0.854349	0.104082	0.0554932	0.017688	0.0148574	0.0623892	6.69767e-05	6.67712e-05	0.0566973	0.0131674	1.136e-05	0.0158022	0.0288636	0.0146079	0.0382117	0.0575823	0.0361237	0.116177	0	0	0.0400896	0.00928395	0	0.010922	0.0204562	0.0101627	0.0272165	0.040403	0.0255846	0.0844482	140766	chr10	72432559	72522195	5258	+	NM_080722	protein_coding	FLJ32820	P31777	ADAM metallopeptidase with thrombospondin type 1 motif 14	ADAMTS14
302	ADAMTS15	0.924698	0.914919	0.989424	0.0964487	0.172295	0.856287	2.18646	2.07351	2.05817	2.18903	2.20678	2.06558	2.2765	2.09555	2.03794	1.99236	2.16255	2.02124	1.86908	2.10295	2.21728	3.53059	3.58687	3.18636	3.86078	3.26915	3.09676	2.99628	3.47535	3.0815	2.63999	3.31054	3.6681	170689	chr11	130318869	130346539	5676	+	NM_139055	protein_coding	MGC126403	P12079	ADAM metallopeptidase with thrombospondin type 1 motif 15	ADAMTS15
303	ADAMTS16	1.02706	1.07616	1.0478	0.499935	0.151615	0.264821	2.9977	3.03622	3.10359	3.06617	3.03468	2.85801	3.02303	3.04675	3.10289	3.03126	2.96041	3.05993	3.10452	3.22498	3.01643	7.3139	7.13429	6.25086	7.15954	7.25314	7.56864	7.21497	6.78	7.38992	7.56816	8.38503	7.12765	170690	chr5	5140443	5320412	4974	+	NM_139056	protein_coding	ADAMTS16s|FLJ16731	P35205	ADAM metallopeptidase with thrombospondin type 1 motif 16	ADAMTS16
304	ADAMTS17	0.982353	0.970762	0.9882	0.627197	0.432042	0.604987	0.285617	0.259931	0.242806	0.189529	0.35443	0.366705	0.223361	0.196944	0.261824	0.294235	0.284739	0.28999	0.181994	0.236779	0.2603	0.138532	0.275777	0.28944	0.168498	0.145945	0.198179	0.227822	0.21805	0.224604	0.133498	0.179465	0.199074	170691	chr15	100511643	100882183	6331	-	NM_139057	protein_coding	FLJ16363|FLJ32769	P2958	ADAM metallopeptidase with thrombospondin type 1 motif 17	ADAMTS17
305	ADAMTS18	1.00694	1.00561	0.998688	0.161836	0.356142	0.858575	6.27425e-06	0.00997859	0.00808412	1.25678e-05	1.25292e-05	0	0	2.13161e-06	0.013982	0	0.0257691	0	6.58436e-06	0.0320618	0	0	0	0	0	0	0.00966812	0	0.018004	0	0	0.0226628	0	170692	chr16	77316025	77469011	5913	-	NM_199355	protein_coding	ADAMTS21	P1631	ADAM metallopeptidase with thrombospondin type 1 motif 18	ADAMTS18
306	ADAMTS19	1.00284	0.999999	0.997164	0.356048	0.288923	0.355935	1.40887e-06	0.00409774	3.69626e-07	2.82206e-06	2.8134e-06	0	0	4.78649e-07	0.016321	0	1.66177e-07	0	1.4785e-06	0	0	0	0	0	0	0	0.0113002	0	0	0	0	0	0	171019	chr5	128796103	129074376	5089	+	NM_133638	protein_coding	FLJ16042	P15152	ADAM metallopeptidase with thrombospondin type 1 motif 19	ADAMTS19
307	ADAMTS19-AS1	1	1	1	1	1	1	0	0	0	0	0	0	0	0	0	0	0	0	0	0	0	0	0	0	0	0	0	0	0	0	0	0	0	103689846	chr5	128795252	128796382	786	-	NR_125748	lncRNA	.	.	ADAMTS19 antisense RNA 1	ADAMTS19-AS1
308	ADAMTS2	1.00007	0.998561	0.998488	0.99634	0.943806	0.944816	0.0409606	0.0410656	0.0388825	0.0391196	0.0765986	0.0111114	0.0362534	0.0386791	0.084433	0	0.0399105	0.103353	4.43526e-05	0.0495934	0	0.0270099	0.0537803	0.00773426	0.0256795	0.0270925	0.0599805	0	0.0280215	0.0750254	0	0.0352654	0	9509	chr5	178537852	178772431	7070	-	NM_014244	protein_coding	ADAM-TS2|ADAMTS-2|ADAMTS-3|DKFZp686F12218|NPI|PC I-NP|PCI-NP|PCINP|PCPNI|PNPI	P2233	ADAM metallopeptidase with thrombospondin type 1 motif 2	ADAMTS2
309	ADAMTS20	1.00572	1.00224	0.996538	0.66173	0.868904	0.777937	0.0311765	0.039409	0.0344064	0.0263283	0.0132352	0.0131606	0.0711904	0.0635673	0.0144569	0.052472	0.0266058	0.0693164	0.0354542	0.0165852	0.015612	0.0180581	0.00898718	0.00916689	0.0509442	0.0449357	0.00998309	0.0374167	0.0185915	0.0497903	0.0246495	0.0117012	0.0110339	80070	chr12	43748012	43945724	5522	-	NM_025003	protein_coding	ADAM-TS20|ADAMTS-20|GON-1	P13099	ADAM metallopeptidase with thrombospondin type 1 motif 20	ADAMTS20
310	ADAMTS3	0.962037	0.92808	0.964703	0.174001	0.0404402	0.235196	0.546928	0.491092	0.43925	0.516745	0.487534	0.572491	0.607888	0.484067	0.558939	0.45929	0.45975	0.408995	0.512717	0.462543	0.368636	0.426539	0.398025	0.487146	0.526406	0.397999	0.471592	0.377421	0.375074	0.330748	0.424552	0.380008	0.29318	9508	chr4	73146686	73434516	5822	-	NM_014243	protein_coding	ADAMTS-4|KIAA0366	P18564	ADAM metallopeptidase with thrombospondin type 1 motif 3	ADAMTS3
311	ADAMTS4	1.0037	0.995483	0.991812	0.731034	0.531216	0.427833	0.0125235	0.0178542	0.00599274	2.5268e-05	0.0175974	0	0.032219	4.28571e-06	9.13868e-06	0.0177601	0.0529919	0	0.023823	0	0	0	0.0120319	0	0.0227759	0	0	0.0125461	0.0373823	0	0.0164921	0	0	9507	chr1	161159538	161168845	4332	-	NM_005099	protein_coding	ADAMTS-2|ADAMTS-4|ADMP-1|KIAA0688	P6654	ADAM metallopeptidase with thrombospondin type 1 motif 4	ADAMTS4
312	ADAMTS5	0.990485	0.973958	0.983314	0.363066	0.0243873	0.115508	0.0769195	0.0631272	0.0388512	0.0970267	0.0603482	0.0604663	0.0894531	0.0811559	0.0335133	0.0685303	0.0688726	0.0204216	0.0515527	0.0289638	0.0541778	0.0686508	0.0420489	0.0428113	0.064411	0.057727	0.0233347	0.049127	0.0488536	0.0145381	0.0360622	0.0204993	0.0386431	11096	chr21	28290231	28339439	9663	-	NM_007038	protein_coding	ADAMTS11|ADMP-2|FLJ36738	P5662	ADAM metallopeptidase with thrombospondin type 1 motif 5	ADAMTS5
313	ADAMTS6	0.8833	0.864502	0.978718	0.0208888	0.0151694	0.671434	2.70603	2.527	2.49597	2.68187	2.76441	2.76098	2.61135	2.41041	2.62571	2.56323	2.4999	2.58491	2.57863	2.4381	2.37058	5.37263	5.74866	5.77913	5.1326	4.30972	5.15632	4.93768	4.65409	5.03451	4.9517	4.43967	4.19414	11174	chr5	64444563	64777704	7268	-	NM_197941	protein_coding	ADAM-TS 6|ADAM-TS6|ADAMTS-6	P20432	ADAM metallopeptidase with thrombospondin type 1 motif 6	ADAMTS6
314	ADAMTS7	1.06834	1.03573	0.969478	0.00642471	0.114126	0.131871	0.169423	0.264792	0.220073	0.217173	0.156224	0.169468	0.133526	0.293987	0.287013	0.232461	0.244741	0.223632	0.271887	0.21181	0.171173	0.16054	0.112797	0.124665	0.0977093	0.225632	0.219289	0.176148	0.184759	0.169275	0.206235	0.159125	0.126972	11173	chr15	79051545	79103773	5490	-	NM_014272	protein_coding	ADAM-TS 7|ADAM-TS7|ADAMTS-7|DKFZp434H204	P2525	ADAM metallopeptidase with thrombospondin type 1 motif 7	ADAMTS7
315	ADAMTS7P1	1	1	1	1	1	1	0	0	0	0	0	0	0	0	0	0	0	0	0	0	0	0	0	0	0	0	0	0	0	0	0	0	0	390660	chr15	82585621	82924242	9966	+	NR_045529	misc_RNA	.	.	ADAMTS7 pseudogene 1	ADAMTS7P1
316	ADAMTS8	1.03328	1.03028	0.997104	0.128802	0.0515314	0.888288	0.015815	0.0630417	0.0588575	0.0417295	9.66971e-05	0.0210185	0	0.100421	0.0456143	0	0.103605	0.0280043	0.0561104	0.0526241	0.0978167	0.0288401	0	0.0146797	0	0.0719311	0.0319278	0	0.0744002	0.0199237	0.0393353	0.0374587	0.0706912	11095	chr11	130274818	130298539	3663	-	NM_007037	protein_coding	ADAM-TS8|FLJ41712|METH2	P7407	ADAM metallopeptidase with thrombospondin type 1 motif 8	ADAMTS8
317	ADAMTS9	2.32802	2.50964	1.07801	9.69345e-07	1.17273e-07	0.066203	1.94339	3.16249	3.27087	1.9129	1.94269	1.90693	2.00876	3.26065	3.18302	3.08241	3.11746	3.27565	3.25446	3.34374	3.20622	2.73294	2.81111	2.75051	3.04197	8.57298	8.05927	7.50957	7.675	8.73883	8.50883	9.18816	8.2676	56999	chr3	64501331	64673365	7312	-	NM_182920	protein_coding	FLJ42955|KIAA1312	P27598	ADAM metallopeptidase with thrombospondin type 1 motif 9	ADAMTS9
318	ADAMTS9-AS1	1.24085	1.15584	0.931497	0.000525943	0.00377282	0.106066	0.102992	0.414316	0.311938	0.131278	0.120204	0.120784	0.0377567	0.313833	0.415788	0.499774	0.421845	0.257896	0.234744	0.394257	0.35479	0.0937099	0.0854106	0.0873442	0.0269654	0.242571	0.33292	0.416259	0.339458	0.197609	0.17557	0.315809	0.280459	101929335	chr3	64547022	64575760	3930	+	NR_110150	lncRNA	.	.	ADAMTS9 antisense RNA 1	ADAMTS9-AS1
319	ADAMTS9-AS2	1.05606	1.05811	1.00195	0.213697	0.159799	0.958005	0.0949752	0.173664	0.176469	0.200769	0.103826	0.035888	0.0329056	0.260127	0.150195	0.205768	0.0718624	0.266862	0.139128	0.131748	0.164026	0.147635	0.0735027	0.0251956	0.0233786	0.197249	0.109213	0.154418	0.0510192	0.204842	0.100539	0.0962959	0.121297	100507098	chr3	64670546	64997143	2228	+	NR_038264	lncRNA	.	.	ADAMTS9 antisense RNA 2	ADAMTS9-AS2
320	ADAMTSL1	0.903333	0.901231	0.997673	0.0099727	0.0116002	0.955417	2.43649	2.28982	2.28646	2.46351	2.41439	2.44932	2.41816	2.37288	2.26293	2.19026	2.32671	2.27115	2.21192	2.25297	2.40265	4.4789	4.2953	4.46206	4.36322	4.17381	3.7877	3.58479	4.01457	3.85445	3.61605	3.7838	4.30908	92949	chr9	18474079	18910947	7842	+	NM_001040272	protein_coding	ADAMTSL-1|ADAMTSR1|C9orf94|DKFZp686L03130|FLJ35283|FLJ41032|FLJ46891|MGC118803|MGC118805|MGC40193|PUNCTIN	P1612	ADAMTS like 1	ADAMTSL1
321	ADAMTSL2	0.999998	1.00881	1.00881	0.284072	0.356019	0.355909	4.44503e-06	1.31366e-06	0.0126563	8.90371e-06	8.87639e-06	0	0	1.51016e-06	3.2202e-06	0	5.24296e-07	0.0499678	4.66473e-06	0	0	0	0	0	0	0	0	0	0	0.0356573	0	0	0	9719	chr9	136397286	136440641	4133	+	NM_001145320	protein_coding	FLJ45164|KIAA0605	P32723	ADAMTS like 2	ADAMTSL2
322	ADAMTSL3	0.991039	1.00813	1.01725	0.799144	0.734147	0.573109	0.212172	0.199186	0.22386	0.192471	0.293167	0.156201	0.203299	0.275784	0.0877522	0.222164	0.204585	0.218435	0.243559	0.183952	0.248588	0.140954	0.223049	0.114369	0.152262	0.210278	0.0623034	0.167747	0.152247	0.165041	0.182842	0.136889	0.189282	57188	chr15	84322838	84708593	9414	+	NM_001301110	protein_coding	KIAA1233|MGC150716|MGC150717	P2397	ADAMTS like 3	ADAMTSL3
323	ADAMTSL4	1.05022	1.11119	1.05805	0.482953	0.169067	0.356088	1.49103	1.56172	1.64314	1.66483	1.54104	1.29473	1.43799	1.58977	1.697	1.4913	1.45658	1.64621	1.68001	1.76106	1.46985	2.15279	1.89336	1.4535	1.7175	2.00709	2.23562	1.82212	1.74363	2.14476	2.19479	2.39939	1.77957	54507	chr1	150521845	150533412	4323	+	NM_019032	protein_coding	TSRC1	P10116	ADAMTS like 4	ADAMTSL4
324	ADAMTSL4-AS1	1.13191	1.06089	0.937255	0.426553	0.536859	0.704727	0.805898	0.984657	0.891171	0.783616	0.877859	0.80227	0.757028	0.382493	1.34242	0.866306	1.17187	0.73532	1.14702	1.0141	0.60383	0.71428	0.829927	0.743935	0.693589	0.302793	1.53185	0.828033	1.25246	0.670429	1.2096	1.02414	0.523392	574406	chr1	150533371	150547028	1036	-	NR_104133	lncRNA	.	.	ADAMTSL4 antisense RNA 1	ADAMTSL4-AS1
325	ADAMTSL5	1.05437	1.14737	1.08821	0.382908	0.131935	0.344863	2.10432	2.1807	2.30265	2.2135	2.11127	1.97541	2.10724	2.15717	2.28813	2.26227	1.9974	2.04386	2.51226	2.24746	2.36666	3.60728	3.2917	2.93273	3.32353	3.45533	3.87266	3.81818	2.99119	3.14664	4.68631	3.76479	4.17746	339366	chr19	1505017	1513188	2857	-	NM_213604	protein_coding	THSD6	P13607	ADAMTS like 5	ADAMTSL5
326	ADAP1	1.03132	1.01909	0.98814	0.70018	0.80328	0.811529	1.12604	1.17053	1.15332	0.922645	1.2828	0.97499	1.28453	1.26731	1.2436	1.1313	1.02729	1.27431	1.11858	1.10362	1.10961	0.886379	1.42132	0.965749	1.44208	1.40514	1.36371	1.19759	1.0376	1.42853	1.16577	1.15442	1.16421	11033	chr7	937537	995043	2706	-	NM_001284311	protein_coding	CENTA1|GCS1L|p42IP4	P18468	ArfGAP with dual PH domains 1	ADAP1
327	ADAP2	0.995232	0.993002	0.99776	0.863561	0.885946	0.961244	0.238362	0.231467	0.228231	0.30731	0.16169	0.213965	0.266331	0.25842	0.258377	0.165329	0.241705	0.281004	0.147395	0.105401	0.364226	0.234993	0.116966	0.159896	0.203871	0.195801	0.19535	0.122512	0.182267	0.216915	0.106754	0.076468	0.288799	55803	chr17	29248754	29286211	2749	+	NM_018404	protein_coding	CENTA2|HSA272195|cent-b	P13662	ArfGAP with dual PH domains 2	ADAP2
328	ADAR	0.968578	0.961736	0.992936	0.00954121	0.0107986	0.597724	5.26641	5.22035	5.21012	5.26344	5.28279	5.25947	5.25981	5.23076	5.20925	5.19548	5.24537	5.16771	5.23109	5.21121	5.22957	37.1008	37.6167	37.3091	37.4726	36.4989	35.8863	35.8391	36.9147	35.1859	36.3998	36.2019	36.702	103	chr1	154554534	154600456	7183	-	NM_001111	protein_coding	ADAR1|DRADA|DSH|DSRAD|G1P1|IFI-4|IFI4|K88DSRBP|P136	P30415	adenosine deaminase, RNA-specific	ADAR
329	ADARB1	1.05715	0.981565	0.928503	0.167917	0.675071	0.100115	2.66102	2.74119	2.63417	2.7553	2.59936	2.69561	2.58706	2.77846	2.71229	2.66426	2.80552	2.5902	2.52173	2.71366	2.7023	5.70458	5.0166	5.47886	5.03098	5.85303	5.53686	5.36873	5.98824	5.05767	4.72069	5.58405	5.53609	104	chr21	46494493	46646478	3706	+	NM_001160230	protein_coding	ADAR2|DRABA2|DRADA2|RED1	P12740	adenosine deaminase, RNA specific B1	ADARB1
330	ADARB2	0.997054	0.997054	1	0.13456	0.134556	0.917452	0.00425644	4.32882e-07	3.84283e-07	2.93397e-06	0.00888426	0	0.00811345	4.9763e-07	1.06113e-06	0	1.72767e-07	0	1.53713e-06	0	0	0	0.00604619	0	0.00570215	0	0	0	0	0	0	0	0	105	chr10	1223253	1779670	8426	-	NM_018702	protein_coding	ADAR3|FLJ25034|FLJ36975|RED2|hRED2	P7411	adenosine deaminase, RNA specific B2 (inactive)	ADARB2
331	ADARB2-AS1	1	1	1	1	1	1	0	0	0	0	0	0	0	0	0	0	0	0	0	0	0	0	0	0	0	0	0	0	0	0	0	0	0	642394	chr10	1568825	1599179	644	+	NR_033387	lncRNA	.	.	ADARB2 antisense RNA 1	ADARB2-AS1
332	ADAT1	0.971457	0.970528	0.999043	0.25684	0.305865	0.973327	3.45332	3.41154	3.41016	3.43874	3.4517	3.40622	3.51447	3.43425	3.46766	3.37787	3.36394	3.36929	3.48971	3.35246	3.42516	9.7613	9.85884	9.60266	10.4715	9.79576	10.0327	9.44766	9.29083	9.39899	10.1891	9.25484	9.79076	23536	chr16	75632247	75657221	3545	-	NR_036460	protein_coding	HADAT1	.	adenosine deaminase, tRNA specific 1	ADAT1
333	ADAT2	1.08526	1.02101	0.940795	0.081011	0.660197	0.320994	1.86252	1.98057	1.89252	1.90043	1.8648	1.83477	1.84924	1.90506	2.10637	1.88239	2.01712	1.84611	2.0446	1.915	1.74816	2.70976	2.61922	2.56743	2.6148	2.74124	3.29657	2.70214	3.04628	2.61409	3.11228	2.7835	2.37229	134637	chr6	143743969	143771841	7493	-	NM_182503	protein_coding	DEADC1|DKFZp686L1118|FLJ44213|TAD2|dJ20N2|dJ20N2.1	P19982	adenosine deaminase, tRNA specific 2	ADAT2
334	ADAT3	1.12547	1.1442	1.01664	0.114137	0.111709	0.791724	2.58987	2.76041	2.78421	2.78392	2.44933	2.62713	2.4738	2.60284	2.8406	2.80796	2.77874	2.95011	2.72996	2.81144	2.62577	5.83868	4.42091	5.17851	4.57622	5.0673	6.14508	6.03528	5.85967	6.7717	5.6096	6.04559	5.19902	113179	chr19	1905371	1913446	1626	+	NM_138422	protein_coding	FWP005|MST121|MSTP121|S863-5|TAD3	P21973	adenosine deaminase, tRNA specific 3	ADAT3
335	ADCK1	1.023	0.919406	0.898734	0.631568	0.175413	0.113886	0.605913	0.63872	0.484686	0.627362	0.554509	0.71045	0.524108	0.735195	0.495625	0.665979	0.647628	0.459661	0.651365	0.318933	0.489387	0.539693	0.464025	0.636384	0.440346	0.663668	0.408359	0.590095	0.566286	0.378641	0.567941	0.249169	0.406438	57143	chr14	78266426	78400297	2234	+	NM_001142545	protein_coding	FLJ39600	P35024	aarF domain containing kinase 1	ADCK1
336	ADCK2	1.00812	1.07131	1.06268	0.871613	0.162848	0.0126491	3.05373	3.06541	3.15311	3.02512	3.15272	2.87147	3.1477	3.06641	3.0102	3.05043	3.13193	3.16026	3.15681	3.14432	3.151	7.07955	7.82839	6.31883	7.89565	7.36626	7.03483	7.32519	7.76224	7.99383	7.88433	7.87555	7.9218	90956	chr7	140372953	140394908	2364	+	NM_052853	protein_coding	AARF|MGC20727	P7946	aarF domain containing kinase 2	ADCK2
337	ADCK3	1.02146	0.985523	0.964819	0.649227	0.723258	0.444034	3.88415	3.91478	3.86311	3.84609	3.96563	3.785	3.93289	3.9785	3.88452	4.00206	3.78385	3.90252	3.79156	3.80078	3.95123	13.2684	14.5035	12.7861	14.3332	14.7428	13.7276	15.1035	12.7673	14.0504	12.7903	12.9937	14.5398	56997	chr1	227127938	227175246	2924	+	NM_020247	.	.	P25206	aarF domain containing kinase 3	ADCK3
338	ADCK4	1.02513	1.12887	1.1012	0.77811	0.144905	0.0388255	2.17378	2.20959	2.34866	2.40312	2.18721	2.19902	1.85314	2.35611	2.15095	2.12194	2.19781	2.34539	2.37392	2.36063	2.31401	4.25498	3.52354	3.59206	2.62608	4.11418	3.43026	3.37235	3.586	4.10957	4.16567	4.15358	3.9924	79934	chr19	41197434	41222790	2497	-	NM_001142555	.	FLJ12229	P23207	aarF domain containing kinase 4	ADCK4
339	ADCK5	0.916416	0.956618	1.04387	0.198229	0.443733	0.498437	3.07972	2.95379	3.01573	3.00107	3.22824	3.08594	2.99092	2.96582	3.0962	2.96955	2.76429	2.98007	2.91137	3.16137	2.99829	6.9469	8.30496	7.49181	6.97989	6.80285	7.52916	6.87111	5.79104	6.93841	6.49378	7.98036	7.02596	203054	chr8	145597704	145618453	1988	+	NM_174922	protein_coding	FLJ35454|MGC126708	P30495	aarF domain containing kinase 5	ADCK5
340	ADCY1	1.00143	0.999393	0.997967	0.665478	0.87764	0.556615	0.0144479	0.0165088	0.0135723	0.0236944	0.0118879	0.00592339	0.0162278	0.0231794	0.0129941	0.0178219	0.0120125	0.0236429	0.0161016	0.0074621	0.00701728	0.0162554	0.00808955	0.00411567	0.0114302	0.0161457	0.00897604	0.0125926	0.00835019	0.0167733	0.0111027	0.00525575	0.00495308	107	chr7	45613739	45762714	13225	+	NM_001281768	protein_coding	AC1	P25118	adenylate cyclase 1 (brain)	ADCY1
341	ADCY10	0.99037	0.99037	1	0.133789	0.133786	0.917453	0.0139624	1.43891e-06	1.27737e-06	9.75262e-06	9.7227e-06	0.0276791	0.0278839	1.65414e-06	3.52723e-06	0	5.74284e-07	0	5.10948e-06	0	0	0	0	0.019375	0.0196827	0	0	0	0	0	0	0	0	55811	chr1	167778625	167883464	5432	-	NM_001167749	protein_coding	HCA2|RP1-313L4.2|SAC|SACI|Sacy	P30087	adenylate cyclase 10 (soluble)	ADCY10
342	ADCY10P1	0.985119	0.930131	0.944182	0.681104	0.12421	0.203481	0.481687	0.460056	0.377193	0.442006	0.578835	0.418959	0.481716	0.424745	0.479002	0.38537	0.54604	0.42669	0.477548	0.322556	0.272841	0.354853	0.489329	0.337007	0.398369	0.341732	0.392393	0.308396	0.459827	0.347082	0.390372	0.25212	0.209834	221442	chr6	41068773	41108573	4569	+	NR_026938	misc_RNA	.	.	adenylate cyclase 10 (soluble) pseudogene 1	ADCY10P1
343	ADCY2	0.996024	1.0036	1.0076	0.355451	0.474323	0.0245829	0.00574921	1.71258e-06	0.0109303	1.16074e-05	1.15718e-05	0.0228378	0	1.96874e-06	4.19807e-06	0	6.83506e-07	0	0.0155651	0.0144735	0.013627	0	0	0.0159595	0	0	0	0	0	0	0.0107368	0.0101869	0.00960464	108	chr5	7396343	7830194	6553	+	NM_020546	protein_coding	AC2|FLJ16822|FLJ45092|HBAC2|KIAA1060|MGC133314	P13249	adenylate cyclase 2 (brain)	ADCY2
344	ADCY3	1.04083	1.05984	1.01827	0.292882	0.248642	0.608476	4.22401	4.28174	4.30786	4.3202	4.28237	4.11272	4.17113	4.3052	4.31395	4.26456	4.24207	4.18302	4.40218	4.328	4.3097	18.8192	18.306	16.302	17.0889	18.743	18.8331	18.3203	17.9141	17.2838	20.0579	19.1666	18.9249	109	chr2	25042039	25142055	4396	-	NM_004036	protein_coding	AC3|KIAA0511	P10323	adenylate cyclase 3	ADCY3
345	ADCY4	1	1	1	1	1	1	0	0	0	0	0	0	0	0	0	0	0	0	0	0	0	0	0	0	0	0	0	0	0	0	0	0	0	196883	chr14	24787555	24804277	3415	-	NM_001198592	protein_coding	AC4	P24798	adenylate cyclase 4	ADCY4
346	ADCY5	0.989392	1.01039	1.02122	0.417335	0.477626	0.147053	0.0494201	0.0340336	0.0643337	0.0582831	0.01488	0.0439261	0.0798209	0.043208	0.0480536	0.044334	6.1326e-06	0.0392554	0.0397794	0.0912993	0.0861569	0.0405873	0.0100995	0.0309222	0.0572899	0.0303134	0.0336656	0.0315578	0	0.0279897	0.0276962	0.0657793	0.0620365	111	chr3	123001143	123167392	6257	-	NM_183357	protein_coding	AC5	P36078	adenylate cyclase 5	ADCY5
347	ADCY6	0.935341	0.966696	1.03352	0.035223	0.373569	0.31068	2.56696	2.47052	2.51809	2.63904	2.56637	2.57468	2.48352	2.4695	2.45113	2.51074	2.44988	2.42728	2.51412	2.50422	2.62018	5.18668	4.88236	4.95792	4.61269	4.5319	4.45448	4.72529	4.46143	4.41021	4.69161	4.69415	5.17354	112	chr12	49159974	49182820	8562	-	NM_015270	protein_coding	AC6|DKFZp779F075|KIAA0422	P13968	adenylate cyclase 6	ADCY6
348	ADCY7	0.964403	0.936105	0.970657	0.24797	0.0486146	0.26334	2.86156	2.80927	2.7663	2.9338	2.88494	2.8306	2.79294	2.76336	2.81073	2.8815	2.7786	2.71417	2.7952	2.81056	2.7432	6.58724	6.3343	6.11435	5.9561	5.78137	5.99806	6.4037	5.85892	5.60187	5.91493	6.04201	5.72491	113	chr16	50300451	50352045	6264	+	NM_001286057	protein_coding	AC7|FLJ36387|KIAA0037	P30796	adenylate cyclase 7	ADCY7
349	ADCY8	0.990335	0.994412	1.00412	0.168031	0.478232	0.35589	0.014013	2.0351e-06	0.00592838	0.0370485	1.37511e-05	0.018662	0	2.3395e-06	4.98867e-06	0	8.12227e-07	0	7.22649e-06	0.0235616	0	0.0256052	0	0.0130226	0	0	0	0	0	0	0	0.0166174	0	114	chr8	131792547	132052835	4101	-	NM_001115	protein_coding	AC8|ADCY3|HBAC1	P35087	adenylate cyclase 8 (brain)	ADCY8
350	ADCY9	1.01308	1.00729	0.994289	0.795233	0.886396	0.893508	2.49587	2.51462	2.50635	2.47672	2.35235	2.51731	2.62405	2.52094	2.62235	2.4378	2.47057	2.53917	2.60836	2.44148	2.42887	4.52738	4.07017	4.72564	5.1863	4.73279	5.14233	4.44324	4.54032	4.84569	5.07624	4.45195	4.40752	115	chr16	4012650	4166186	7727	-	NM_001116	protein_coding	AC9	P26171	adenylate cyclase 9	ADCY9
351	ADCYAP1	1	1	1	1	1	1	0	0	0	0	0	0	0	0	0	0	0	0	0	0	0	0	0	0	0	0	0	0	0	0	0	0	0	116	chr18	904944	912173	3488	+	NM_001099733	protein_coding	MGC126852|PACAP	P15140	adenylate cyclase activating polypeptide 1	ADCYAP1
352	ADCYAP1R1	1.00022	1.01217	1.01195	0.950345	0.155897	0.164385	0.00586786	0.00618668	0.0233187	2.45992e-05	0.0117176	0.0116819	0	4.17228e-06	0.0128246	0	0.011865	0.0311126	0.0469885	0.0147445	0	0	0.00797689	0.00813239	0	0	0.00885982	0	0.00824744	0.0221011	0.0328472	0.010383	0	117	chr7	31092076	31151093	6656	+	NM_001118	protein_coding	PAC1|PACAPR|PACAPRI	P29359	ADCYAP receptor type I	ADCYAP1R1
353	ADD1	1.05482	1.05632	1.00142	0.00426073	0.0170375	0.927069	5.65408	5.73108	5.73313	5.66427	5.62976	5.63156	5.68989	5.72747	5.74893	5.74254	5.70498	5.69729	5.70837	5.74374	5.7816	49.298	48.1094	48.5809	50.8368	51.9101	52.6191	52.8259	51.139	51.2354	51.0632	52.8119	54.2772	118	chr4	2845584	2931802	4924	+	NM_176801	protein_coding	ADDA|MGC3339|MGC44427	P31313	adducin 1	ADD1
354	ADD2	0.995037	1.01181	1.01685	0.920226	0.806945	0.680527	0.779518	0.77234	0.796454	0.710082	0.739555	0.721949	0.934525	0.691421	0.845893	0.706935	0.838	0.711742	0.885765	0.76309	0.819391	0.629632	0.663244	0.649489	0.915144	0.613827	0.79482	0.636441	0.787156	0.642955	0.843918	0.700556	0.768809	119	chr2	70889216	70995375	6033	-	NM_001185054	protein_coding	ADDB	P4090	adducin 2	ADD2
355	ADD3	0.961564	1.01503	1.0556	0.361654	0.653733	0.199239	2.79957	2.74303	2.8211	2.88745	2.81656	2.73574	2.75358	2.73225	2.62162	2.8451	2.76427	2.77282	2.81201	2.90455	2.79142	6.3473	5.99455	5.66164	5.76888	5.63672	5.13787	6.21921	5.79116	5.87508	5.99624	6.5154	5.953	120	chr10	111765726	111895323	4628	+	NM_019903	protein_coding	ADDL	P6399	adducin 3	ADD3
356	ADD3-AS1	1.01307	1.00832	0.995305	0.634579	0.811514	0.905064	0.0327577	0.0514985	0.0447098	9.05589e-05	9.0281e-05	0.0672286	0.0621702	1.53599e-05	3.27528e-05	0.133622	0.0680316	0	0.171082	0	0	0	0	0.0477109	0.0443709	0	0	0.0977683	0.0482443	0	0.125219	0	0	100505933	chr10	111705317	111768139	1280	-	NR_038943	lncRNA	.	.	ADD3 antisense RNA 1	ADD3-AS1
357	ADGB	1.00503	0.999999	0.994992	0.356012	0.288923	0.355897	2.53691e-06	0.0072435	6.65576e-07	5.08162e-06	5.06603e-06	0	0	8.61891e-07	1.83787e-06	0.0287554	2.99231e-07	0	2.6623e-06	0	0	0	0	0	0	0	0	0.020349	0	0	0	0	0	79747	chr6	146920136	147136597	5289	+	NM_024694	protein_coding	.	P24362	androglobin	ADGB
358	ADGRA1	1	1	1	1	1	1	0	0	0	0	0	0	0	0	0	0	0	0	0	0	0	0	0	0	0	0	0	0	0	0	0	0	0	84435	chr10	134901508	134945179	4277	+	NM_001083909	protein_coding	.	P30669	adhesion G protein-coupled receptor A1	ADGRA1
359	ADGRA1-AS1	1	1	1	1	1	1	0	0	0	0	0	0	0	0	0	0	0	0	0	0	0	0	0	0	0	0	0	0	0	0	0	0	0	100128127	chr10	134898753	134900201	470	-	NR_111905	lncRNA	.	.	adhesion G protein-coupled receptor A1 antisense RNA 1	ADGRA1-AS1
360	ADGRA2	1.02312	0.989523	0.967165	0.253927	0.616525	0.215868	0.089559	0.122532	0.0743649	0.0734155	0.0964827	0.12023	0.0675053	0.17386	0.118504	0.133268	0.0622843	0.0494563	0.050207	0.150922	0.0440757	0.0513812	0.0681901	0.0869222	0.0483039	0.127831	0.085206	0.097563	0.0440737	0.0354106	0.0350703	0.110957	0.0313872	25960	chr8	37654401	37701504	6034	+	NM_032777	protein_coding	.	P14968	adhesion G protein-coupled receptor A2	ADGRA2
361	ADGRA3	0.903069	0.905816	1.00304	0.00404027	0.0109984	0.867596	4.44357	4.29647	4.30086	4.52148	4.44622	4.37591	4.42684	4.31628	4.28577	4.29186	4.29178	4.24628	4.36305	4.2894	4.30226	21.7888	20.6295	19.7646	20.595	18.895	18.4486	18.6903	18.5772	18.1039	19.493	18.6357	18.8237	166647	chr4	22388997	22517677	4567	-	NM_145290	protein_coding	.	P18323	adhesion G protein-coupled receptor A3	ADGRA3
362	ADGRB1	1.00283	0.997625	0.994813	0.638619	0.35572	0.355942	0.00343147	0.00750423	9.83424e-07	7.50835e-06	0.0136698	0	0	1.27349e-06	0.0297839	0	4.4213e-07	0	3.93369e-06	0	0	0	0.00933275	0	0	0	0.0207355	0	0	0	0	0	0	575	chr8	143545377	143626368	5528	+	NM_001702	protein_coding	.	P33164	adhesion G protein-coupled receptor B1	ADGRB1
363	ADGRB2	1.01413	1.04641	1.03184	0.494192	0.140629	0.288081	0.122678	0.142915	0.188129	0.16101	0.0959509	0.0829674	0.149234	0.158774	0.189385	0.124078	0.0977553	0.127952	0.180714	0.278639	0.160797	0.116604	0.0676986	0.0592069	0.109697	0.116091	0.139691	0.0906342	0.0700431	0.0937927	0.132619	0.214131	0.118784	576	chr1	32192706	32229664	5440	-	NM_001294335	protein_coding	.	P20234	adhesion G protein-coupled receptor B2	ADGRB2
364	ADGRB3	0.995277	0.984196	0.988867	0.886318	0.673295	0.674767	0.265197	0.258366	0.242214	0.333267	0.278176	0.140914	0.301087	0.242801	0.267848	0.214794	0.306443	0.154013	0.29515	0.278747	0.236843	0.257274	0.210353	0.102623	0.233316	0.182926	0.203192	0.161842	0.23651	0.114012	0.225754	0.214351	0.179673	577	chr6	69345632	70099403	5637	+	NM_001704	protein_coding	.	P19353	adhesion G protein-coupled receptor B3	ADGRB3
365	ADGRD1	0.996992	0.964085	0.966993	0.941837	0.483143	0.426189	1.14995	1.1456	1.09718	1.25673	1.18719	1.01968	1.12574	1.11921	1.11457	1.11874	1.22673	1.11153	0.993849	1.04896	1.22413	1.37801	1.26612	1.02759	1.18754	1.17049	1.16152	1.17848	1.3397	1.16937	0.98645	1.07427	1.34292	283383	chr12	131438452	131626008	5384	+	NM_198827	protein_coding	.	P30822	adhesion G protein-coupled receptor D1	ADGRD1
366	ADGRE1	0.934595	0.918511	0.98279	0.0927508	0.018404	0.577267	0.258282	0.160696	0.135651	0.322471	0.297065	0.225137	0.184236	0.169106	0.243788	0.163514	0.0605072	0.154871	0.155073	0.0749503	0.156045	0.248108	0.226408	0.168912	0.137067	0.124093	0.183382	0.121031	0.0427799	0.114559	0.112691	0.0538448	0.115134	2015	chr19	6887560	6940464	3049	+	NM_001256255	protein_coding	.	P27423	adhesion G protein-coupled receptor E1	ADGRE1
367	ADGRE2	0.99489	0.992273	0.997369	0.602103	0.484593	0.783886	0.0266504	0.0192598	0.015459	0.0572003	0.0249377	0.0125226	0.0114659	7.23221e-06	0.013754	0.0251643	0.0378429	0	0.0170155	0	0.044363	0.0398611	0.0171129	0.00872035	0.00807598	0	0.00950171	0.01781	0.0265521	0	0.0117342	0	0.0315204	30817	chr19	14843509	14889353	6467	-	NM_013447	protein_coding	.	P7597	adhesion G protein-coupled receptor E2	ADGRE2
368	ADGRE3	1	1	1	1	1	1	0	0	0	0	0	0	0	0	0	0	0	0	0	0	0	0	0	0	0	0	0	0	0	0	0	0	0	84658	chr19	14729929	14785730	2423	-	NM_001289158	protein_coding	.	P4610	adhesion G protein-coupled receptor E3	ADGRE3
369	ADGRE4P	0.999904	1.02113	1.02122	0.989523	0.130892	0.128575	0.00725586	0.00711737	0.0374164	3.63165e-05	3.62051e-05	0.0287359	0	0.0282462	1.31346e-05	0	2.13851e-06	0.0758918	0.0385706	0	0.0342003	0	0	0.0201224	0	0.0197124	0	0	0	0.0545951	0.0268668	0	0.0242296	326342	chr19	6952511	6990857	2732	-	NR_024075	misc_RNA	.	.	adhesion G protein-coupled receptor E4, pseudogene	ADGRE4P
370	ADGRE5	1.00999	1.04435	1.03402	0.581799	0.110611	0.115739	6.73282	6.74716	6.79543	6.76104	6.70728	6.6809	6.77985	6.75169	6.75583	6.76076	6.72002	6.78156	6.79081	6.74598	6.86092	106.57	102.636	101.612	109.347	106.61	106.749	108.027	104.37	109.761	109.246	106.797	115.809	976	chr19	14491956	14519537	3492	+	NM_001784	protein_coding	.	P3441	adhesion G protein-coupled receptor E5	ADGRE5
371	ADGRF1	0.762138	0.882252	1.1576	0.0133166	0.229123	0.144349	1.78762	1.39575	1.60689	1.97354	1.54706	1.76307	1.83436	1.37937	1.45517	1.2221	1.51031	1.26178	1.75887	1.6681	1.68865	2.9056	1.9052	2.39443	2.57641	1.59892	1.73603	1.34209	1.84772	1.40978	2.37422	2.18753	2.23468	266977	chr6	46965440	47010099	6080	-	NM_153840	protein_coding	.	P1663	adhesion G protein-coupled receptor F1	ADGRF1
372	ADGRF2	0.999988	0.998106	0.998118	0.997764	0.681149	0.682734	0.00742611	0.00740847	0.00469039	0.0148486	0.0147797	0	0	0.0145449	4.8696e-06	0	0.0150085	0	7.05402e-06	0.0186638	0	0.0101408	0.0100939	0	0	0.0100985	0	0	0.0104452	0	0	0.0131479	0	222611	chr6	47624326	47665533	5126	+	NM_153839	protein_coding	.	P24819	adhesion G protein-coupled receptor F2	ADGRF2
373	ADGRF3	1.02584	1.05894	1.03226	0.53902	0.239902	0.523307	0.121984	0.158788	0.204598	0.207523	0.138529	0.0369224	0.0996479	0.0891157	0.236615	0.227564	0.0739546	0.120313	0.183229	0.157108	0.347121	0.152965	0.0994281	0.0259313	0.0720849	0.0635397	0.177541	0.172067	0.0525423	0.0880008	0.134578	0.115815	0.273471	165082	chr2	26531041	26569685	5128	-	NM_153835	protein_coding	.	P17878	adhesion G protein-coupled receptor F3	ADGRF3
374	ADGRF4	1.0404	1.08717	1.04495	0.270613	0.0449448	0.31249	0.106103	0.163241	0.226681	0.140797	0.095195	0.141517	0.0447136	0.0712961	0.201622	0.120225	0.252954	0.244769	0.216375	0.120357	0.318281	0.101135	0.0671168	0.103082	0.0318529	0.0505016	0.149369	0.0877309	0.191528	0.1865	0.16087	0.0876607	0.248221	221393	chr6	47666289	47689757	3162	+	NM_153838	protein_coding	.	P6470	adhesion G protein-coupled receptor F4	ADGRF4
375	ADGRF5	0.835619	0.829027	0.992111	4.75714e-05	0.000169031	0.791851	6.24525	5.98617	5.97475	6.27033	6.25291	6.23637	6.22094	6.00584	5.95548	5.93722	6.04371	5.88552	6.0448	6.00192	5.962	75.5645	74.6473	74.4013	73.9014	63.1701	60.8699	60.6072	64.9366	58.5212	64.7348	63.3603	61.6446	221395	chr6	46820242	46922675	6022	-	NM_001098518	protein_coding	.	P3087	adhesion G protein-coupled receptor F5	ADGRF5
376	ADGRG1	0.950235	0.979869	1.03119	0.192647	0.55955	0.266833	4.30554	4.2319	4.2762	4.41606	4.29078	4.22239	4.28603	4.29565	4.16987	4.20316	4.25568	4.30379	4.28921	4.20556	4.30396	20.1829	18.4191	17.6685	18.5873	18.6127	16.9471	17.5161	18.0935	18.8782	18.4707	17.527	18.8458	9289	chr16	57653605	57698951	5805	+	NM_001290143	protein_coding	.	P952	adhesion G protein-coupled receptor G1	ADGRG1
377	ADGRG2	1.23748	0.898989	0.726465	0.0667858	0.255553	0.00926874	1.14387	1.45128	0.990249	1.25601	1.18327	1.27575	0.814307	1.37549	1.69616	1.42429	1.27459	0.973	0.80466	1.0626	1.10284	1.37638	1.25954	1.4214	0.762924	1.59237	2.23471	1.69256	1.41858	0.971041	0.742192	1.09418	1.15425	10149	chrX	19007425	19140755	4892	-	NM_001079858	protein_coding	.	P7438	adhesion G protein-coupled receptor G2	ADGRG2
378	ADGRG3	1.00554	1.01304	1.00746	0.356254	0.13405	0.453057	9.32283e-06	0.00797935	0.0187019	1.86743e-05	1.8617e-05	0	0	3.16734e-06	6.75393e-06	0	0.0316463	0	9.78361e-06	0.0371643	0.0371549	0	0	0	0	0	0	0	0.0221563	0	0	0.0263101	0.0263356	222487	chr16	57702157	57723290	2670	+	NM_001308360	protein_coding	.	P4339	adhesion G protein-coupled receptor G3	ADGRG3
379	ADGRG4	0.994859	0.995589	1.00073	0.360394	0.40114	0.830179	0.0112447	0.00380878	0.004867	0.0224549	0.0223499	0	0	2.32956e-06	4.96747e-06	0	0.0151679	0.00998265	7.19579e-06	0.00944544	0	0.0154063	0.0153342	0	0	0	0	0	0.0105568	0.00706851	0	0.00664457	0	139378	chrX	135383122	135499047	9931	+	NM_153834	protein_coding	.	P9062	adhesion G protein-coupled receptor G4	ADGRG4
380	ADGRG5	0.996229	0.996228	1	0.355862	0.355857	0.917453	0.00545191	5.4813e-07	4.86593e-07	0.0216815	3.7037e-06	0	0	6.30116e-07	1.34364e-06	0	2.18764e-07	0	1.94637e-06	0	0	0.0148764	0	0	0	0	0	0	0	0	0	0	0	221188	chr16	57576333	57611100	4041	+	NM_001304376	protein_coding	.	P23954	adhesion G protein-coupled receptor G5	ADGRG5
381	ADGRG6	1.03493	0.992389	0.958897	0.183414	0.822315	0.282563	3.80259	3.85212	3.79157	3.83995	3.75811	3.81758	3.79343	3.83577	3.86191	3.78764	3.91999	3.7133	3.91116	3.75179	3.78226	13.2093	12.4247	13.101	12.9208	13.2597	13.499	12.8807	14.13	12.2016	13.9841	12.5262	12.823	57211	chr6	142623056	142767403	6961	+	NM_020455	protein_coding	.	P14209	adhesion G protein-coupled receptor G6	ADGRG6
382	ADGRG7	1	1	1	1	1	1	0	0	0	0	0	0	0	0	0	0	0	0	0	0	0	0	0	0	0	0	0	0	0	0	0	0	0	84873	chr3	100328433	100414323	3429	+	NM_032787	protein_coding	.	P14953	adhesion G protein-coupled receptor G7	ADGRG7
383	ADGRL1	0.974219	1.07749	1.106	0.581543	0.00961915	0.0546615	3.02932	2.99164	3.137	3.05012	3.05369	2.95863	3.0526	3.02634	3.13353	2.84515	2.946	3.0862	3.14651	3.14363	3.17033	7.22163	7.24222	6.77462	7.3284	7.13715	7.75264	6.222	6.70266	7.54398	7.82137	7.87099	8.04164	22859	chr19	14258549	14316997	7857	-	NM_014921	protein_coding	.	P19921	adhesion G protein-coupled receptor L1	ADGRL1
384	ADGRL2	0.965684	0.949114	0.982841	0.508719	0.414028	0.811239	1.70671	1.65633	1.63136	1.79385	1.61852	1.7305	1.67816	1.72682	1.62856	1.48455	1.76904	1.40113	1.77502	1.61392	1.70836	2.44727	2.05242	2.31868	2.20986	2.30668	2.0854	1.8094	2.40709	1.65433	2.41199	2.07033	2.27941	23266	chr1	82165455	82458422	6208	+	NM_001297704	protein_coding	.	P27989	adhesion G protein-coupled receptor L2	ADGRL2
385	ADGRL3	0.981158	0.976186	0.994933	0.243131	0.482702	0.873621	0.271558	0.244115	0.236786	0.298745	0.307364	0.238416	0.240288	0.234575	0.258886	0.219838	0.262731	0.28556	0.21685	0.119896	0.316987	0.227666	0.235002	0.179723	0.182308	0.176207	0.195756	0.165918	0.199616	0.220813	0.161153	0.0873987	0.247226	23284	chr4	62362839	62938168	6125	+	NM_015236	protein_coding	.	P24407	adhesion G protein-coupled receptor L3	ADGRL3
386	ADGRL3-AS1	1	1	1	1	1	1	0	0	0	0	0	0	0	0	0	0	0	0	0	0	0	0	0	0	0	0	0	0	0	0	0	0	0	101927186	chr4	62937473	63027483	467	-	NR_110595	lncRNA	.	.	adhesion G protein-coupled receptor L3 antisense RNA 1	ADGRL3-AS1
387	ADGRL4	1	1	1	1	1	1	0	0	0	0	0	0	0	0	0	0	0	0	0	0	0	0	0	0	0	0	0	0	0	0	0	0	0	64123	chr1	79355449	79472495	3619	-	NM_022159	protein_coding	.	P23672	adhesion G protein-coupled receptor L4	ADGRL4
388	ADGRV1	0.982619	0.989682	1.00719	0.410449	0.637878	0.690588	0.956487	0.931191	0.941525	1.00985	0.980327	0.911018	0.922449	0.960844	0.931122	0.886069	0.945651	0.886288	0.953453	0.974038	0.950828	1.0049	0.964328	0.880476	0.899547	0.945007	0.903755	0.853398	0.925563	0.855017	0.932078	0.968809	0.938041	84059	chr5	89854617	90460033	19250	+	NM_032119	protein_coding	.	P30923	adhesion G protein-coupled receptor V1	ADGRV1
389	ADH1A	0.980974	0.980974	1	0.355861	0.355856	0.917453	0.0277157	2.82443e-06	2.50734e-06	0.107787	1.90845e-05	0	0	3.24689e-06	6.92356e-06	0	1.12726e-06	0	1.00293e-05	0	0	0.0766812	0	0	0	0	0	0	0	0	0	0	0	124	chr4	100197523	100212185	1500	-	NM_000667	protein_coding	ADH1	P10186	alcohol dehydrogenase 1A (class I), alpha polypeptide	ADH1A
390	ADH1B	1	1	1	1	1	1	0	0	0	0	0	0	0	0	0	0	0	0	0	0	0	0	0	0	0	0	0	0	0	0	0	0	0	125	chr4	100227544	100242599	2814	-	NM_001286650	protein_coding	ADH2|DKFZp686C06125	P4124	alcohol dehydrogenase 1B (class I), beta polypeptide	ADH1B
391	ADH1C	0.988355	0.950189	0.961385	0.717697	0.125722	0.0800389	0.0878059	0.0709071	0.0140927	0.133765	0.0460381	0	0.165342	0.0458197	0.0507416	0.137674	0.0472746	0	6.41415e-05	0	0.0555015	0.0960224	0.0318674	0	0.122098	0.0321746	0.0355812	0.100887	0.0332774	0	0	0	0.0396003	126	chr4	100257649	100274202	1758	-	NM_000669	protein_coding	ADH3	P23590	alcohol dehydrogenase 1C (class I), gamma polypeptide	ADH1C
392	ADH4	1.00127	0.986573	0.985322	0.91572	0.134118	0.134415	0.0195061	0.0213366	3.72771e-06	2.84606e-05	2.83732e-05	0.0403007	0.037146	4.8272e-06	0.0438705	0	0.0408477	0	1.49108e-05	0	0	0	0	0.0283338	0.0262964	0	0.0307046	0	0.0286916	0	0	0	0	127	chr4	100044808	100065449	2246	-	NM_000670	protein_coding	ADH-2	P27238	alcohol dehydrogenase 4 (class II), pi polypeptide	ADH4
393	ADH5	1.04481	1.01402	0.970525	0.14967	0.67193	0.242792	5.33644	5.39968	5.35652	5.3248	5.31619	5.2686	5.43121	5.43029	5.358	5.42501	5.3842	5.39276	5.31162	5.41664	5.30159	38.7536	38.518	37.5524	42.3258	42.061	39.8922	42.1905	40.7443	41.2933	38.5455	41.8944	38.6333	128	chr4	99992130	100009939	2651	-	NM_000671	protein_coding	ADH-3|ADHX|FDH|GSNOR	P13612	alcohol dehydrogenase 5 (class III), chi polypeptide	ADH5
394	ADH6	1.01154	0.992492	0.981169	0.501395	0.688999	0.308077	0.0302858	0.0468392	0.019413	6.75368e-05	0.0593052	0.0605276	0	0.0593814	0.0655796	0.0613893	3.97696e-06	0	3.53833e-05	0.0760986	0	0	0.0413478	0.042855	0	0.0419138	0.0462655	0.043886	0	0	0	0.0545466	0	130	chr4	100123795	100140403	3145	-	NM_001102470	protein_coding	ADH-5	P24462	alcohol dehydrogenase 6 (class V)	ADH6
395	ADH7	1	1	1	1	1	1	0	0	0	0	0	0	0	0	0	0	0	0	0	0	0	0	0	0	0	0	0	0	0	0	0	0	0	131	chr4	100333418	100356667	2397	-	NM_000673	protein_coding	ADH4	P29870	alcohol dehydrogenase 7 (class IV), mu or sigma polypeptide	ADH7
396	ADHFE1	0.97038	0.902546	0.930095	0.72037	0.309953	0.215649	0.371673	0.328295	0.223745	0.588992	0.499449	0.125029	0.222818	0.235923	0.336317	0.385949	0.350731	0.314164	0.358182	0.053674	0.148007	0.500249	0.410155	0.0905497	0.168111	0.177283	0.261537	0.308682	0.275041	0.245459	0.280315	0.0384592	0.109069	137872	chr8	67344718	67381044	1895	+	NM_144650	protein_coding	ADH8|FLJ32430|HOT|MGC48605	P20478	alcohol dehydrogenase, iron containing 1	ADHFE1
397	ADI1	1.05415	1.02871	0.975869	0.092764	0.334637	0.443704	6.21441	6.29049	6.25525	6.21747	6.1885	6.17225	6.27718	6.27971	6.30147	6.3608	6.21628	6.31718	6.17141	6.2452	6.28317	72.8016	71.3354	71.1236	76.8819	76.5848	77.6401	81.6253	73.315	79.2741	70.763	75.1814	77.2621	55256	chr2	3501690	3523350	4616	-	NM_001306077	protein_coding	APL1|ARD|FLJ10913|MTCBP1|SIPL	P24785	acireductone dioxygenase 1	ADI1
398	ADIG	1	1	1	1	1	1	0	0	0	0	0	0	0	0	0	0	0	0	0	0	0	0	0	0	0	0	0	0	0	0	0	0	0	149685	chr20	37209838	37217106	658	+	NM_001018082	protein_coding	KIAA1219|MGC149650|MGC39724|SMAF1	P7385	adipogenin	ADIG
399	ADIPOQ	0.997906	1.00616	1.00827	0.810003	0.474741	0.377369	0.0121507	0.00912673	0.0210101	0.0330768	2.92852e-05	0	0.015239	4.98236e-06	0.036159	0	1.72977e-06	0	0.022248	0.0417333	0.0197561	0.0228061	0	0	0.0107315	0	0.0252312	0	0	0	0.015389	0.0295882	0.0139476	9370	chr3	186560463	186576252	4629	+	NM_004797	protein_coding	ACDC|ACRP30|ADIPQTL1|ADPN|APM-1|APM1|GBP28|adiponectin	P16178	adiponectin, C1Q and collagen domain containing	ADIPOQ
400	ADIPOQ-AS1	1.00025	0.996409	0.99616	0.963641	0.355575	0.355912	0.00519082	0.0055511	9.7831e-07	7.46931e-06	7.44639e-06	0	0.0206374	0.0220743	2.70142e-06	0	4.39831e-07	0	3.91324e-06	0	0	0	0	0	0.0145397	0.0153722	0	0	0	0	0	0	0	100874095	chr3	186569676	186573912	3442	-	NR_046662	lncRNA	.	.	ADIPOQ antisense RNA 1	ADIPOQ-AS1
401	ADIPOR1	0.981275	0.938868	0.956784	0.478923	0.0034676	0.149794	5.39564	5.36837	5.30463	5.4261	5.37988	5.37592	5.40009	5.41618	5.3086	5.30699	5.43673	5.26514	5.2918	5.32552	5.33499	41.6485	40.3037	40.5296	41.4015	41.642	38.5154	38.7999	42.2926	37.7152	38.0059	39.2701	39.5609	51094	chr1	202909953	202927700	2423	-	NM_015999	protein_coding	ACDCR1|CGI45|FLJ25385|FLJ42464|PAQR1|TESBP1A	P18337	adiponectin receptor 1	ADIPOR1
402	ADIPOR2	0.96898	0.958686	0.989377	0.0311797	0.0391593	0.557165	4.93036	4.8849	4.86949	4.94548	4.90934	4.94905	4.91717	4.91805	4.88734	4.87733	4.85619	4.92868	4.8328	4.86642	4.84822	29.5668	28.8105	29.8928	29.3386	29.1918	28.51	28.5472	27.9503	29.6577	27.3774	28.293	27.9442	79602	chr12	1800247	1897845	3965	+	NM_024551	protein_coding	ACDCR2|FLJ21432|MGC4640|PAQR2	P9997	adiponectin receptor 2	ADIPOR2
403	ADIRF	0.924404	1.01236	1.09514	0.596898	0.948262	0.557053	2.70994	2.59653	2.72765	2.16742	2.97386	2.56756	2.98095	2.80675	2.46724	2.5706	2.51748	2.70844	2.14096	3.10845	2.79157	3.45724	6.80351	4.92862	6.92233	5.9888	4.51506	4.96888	4.72332	5.57428	3.39247	7.65428	5.95281	10974	chr10	88728188	88730666	672	+	NM_006829	protein_coding	.	P29207	adipogenesis regulatory factor	ADIRF
404	ADK	1.05195	1.00516	0.955521	0.125653	0.874076	0.057329	5.95628	6.02934	5.9637	5.88261	5.92071	5.95619	6.05953	6.01161	6.03411	6.07196	5.99862	5.95567	5.9161	6.0261	5.95474	57.5134	59.0821	61.0922	65.9741	63.4276	64.3378	66.633	62.9079	61.4825	59.1245	64.4459	61.3287	132	chr10	75910943	76469061	2439	+	NM_001202450	protein_coding	AK	P4631	adenosine kinase	ADK
405	ADM	0.704206	0.663712	0.942497	4.15347e-05	4.90674e-06	0.0974372	7.19278	6.68685	6.60141	7.13789	7.24036	7.14383	7.24542	6.77562	6.628	6.72377	6.61373	6.64964	6.58369	6.60096	6.57008	138.69	148.981	140.433	151.367	108.41	97.6098	105.27	96.8856	100.088	94.4972	96.492	94.4898	133	chr11	10326527	10328949	1590	+	NM_001124	protein_coding	AM	P31420	adrenomedullin	ADM
406	ADM2	1.01582	0.984968	0.969624	0.804209	0.857685	0.688179	1.38305	1.4057	1.3612	1.55186	1.39877	1.3517	1.2091	1.49215	1.25653	1.46672	1.39598	1.53611	1.44049	1.08665	1.34364	1.91639	1.62261	1.55231	1.31838	1.81052	1.3845	1.77366	1.63083	1.91283	1.70649	1.12987	1.54616	79924	chr22	50919985	50924866	4434	+	NM_024866	protein_coding	AM2|FLJ21135|dJ579N16.4	P24757	adrenomedullin 2	ADM2
407	ADM5	1.03663	1.03468	0.998123	0.624982	0.744951	0.983125	1.53621	1.58811	1.5854	1.48054	1.40709	1.77873	1.44757	1.44861	1.64201	1.57668	1.67489	1.83016	1.4402	1.33615	1.68236	1.77436	1.63659	2.43149	1.73561	1.72676	2.11456	1.99408	2.19188	2.57207	1.7053	1.53252	2.22046	199800	chr19	50191942	50194247	2112	+	NM_001101340	protein_coding	.	P23281	adrenomedullin 5 (putative)	ADM5
408	ADNP	1.00268	1.01173	1.00903	0.923671	0.711945	0.820963	4.55199	4.55585	4.56882	4.55807	4.51393	4.558	4.57722	4.61172	4.49179	4.49189	4.62254	4.5265	4.6806	4.49588	4.56542	22.369	21.6644	22.558	22.9687	23.4163	21.4335	21.6195	23.6219	22.199	24.5392	21.6575	22.7904	23394	chr20	49505455	49547527	6517	-	NM_001282532	protein_coding	ADNP1|KIAA0784	P21562	activity-dependent neuroprotector homeobox	ADNP
409	ADNP-AS1	0.870053	0.840503	0.966036	0.39104	0.0850777	0.847223	1.34034	1.13951	1.08966	1.52454	1.24905	1.28678	1.28379	0.89347	0.80144	1.67778	1.00893	1.00515	1.04514	1.36993	0.89349	1.8629	1.36506	1.43999	1.44097	0.856073	0.739734	2.20947	1.01183	1.01541	1.05816	1.59125	0.863205	101927631	chr20	49547521	49561671	1106	+	NR_110007	lncRNA	.	.	ADNP antisense RNA 1	ADNP-AS1
410	ADNP2	1.03906	1.04311	1.0039	0.394949	0.482472	0.938924	3.49961	3.55488	3.5605	3.6435	3.47539	3.44976	3.41911	3.51936	3.57626	3.48723	3.63241	3.40239	3.68273	3.50826	3.63218	11.403	10.0368	9.92756	9.73945	10.4516	10.895	10.2708	11.3957	9.64168	11.7911	10.4243	11.4553	22850	chr18	77866915	77898228	5387	+	NM_014913	protein_coding	KIAA0863|ZNF508	P27744	ADNP homeobox 2	ADNP2
411	ADO	0.956117	0.900175	0.941491	0.134457	0.00312758	0.052407	4.13401	4.06927	3.98229	4.16667	4.06206	4.15983	4.14507	4.09552	4.00242	4.04146	4.13416	3.92146	3.99363	3.99395	4.0183	16.8206	15.5728	16.8762	16.7628	16.0726	14.981	15.5516	16.5512	14.2522	14.8634	14.9989	15.2811	84890	chr10	64564516	64568239	3724	+	NM_032804	protein_coding	C10orf22|DKFZp564C046|FLJ14547	P8245	2-aminoethanethiol (cysteamine) dioxygenase	ADO
412	ADORA1	0.974221	0.945327	0.970341	0.735419	0.472369	0.430859	0.239925	0.202246	0.15881	0.477653	0.281403	0.110311	0.0515968	0.280344	0.091045	0.215561	0.21558	0.214369	0.146536	0.203004	0.0666299	0.389366	0.213183	0.0794766	0.0368449	0.214112	0.0647312	0.162381	0.161061	0.161728	0.106132	0.152032	0.0478455	134	chr1	203096836	203136533	2919	+	NM_000674	protein_coding	RDC7	P14471	adenosine A1 receptor	ADORA1
413	ADORA2A	0.858731	0.917779	1.06876	0.171819	0.414533	0.592947	1.1764	0.956676	1.05262	1.21435	1.37287	1.04177	1.05068	0.648872	1.20336	1.07319	0.838791	1.08144	0.948438	1.33776	0.785448	1.30952	1.57787	1.05888	1.07646	0.566752	1.29886	1.11055	0.788064	1.1243	0.925074	1.53373	0.728373	135	chr22	24819565	24828694	553	+	NM_001278500	protein_coding	ADORA2|RDC8|hA2aR	P32517	adenosine A2a receptor	ADORA2A
414	ADORA2A-AS1	0.960943	0.996849	1.03736	0.164623	0.91635	0.278807	0.136836	0.0793591	0.132282	0.0897713	0.199719	0.119156	0.136438	0.0456266	0.160087	0.0468966	0.0616631	0.0408913	0.195157	0.113393	0.174709	0.0632314	0.146878	0.0861141	0.0998314	0.0320204	0.116851	0.0334772	0.0436224	0.0292571	0.144022	0.0823543	0.129619	646023	chr22	24825178	24890783	3761	-	NR_028484	lncRNA	.	.	ADORA2A antisense RNA 1	ADORA2A-AS1
415	ADORA2B	0.960285	0.918938	0.956943	0.34653	0.113472	0.156717	5.51703	5.45857	5.39507	5.66618	5.46622	5.49262	5.43155	5.42927	5.50459	5.4398	5.45944	5.29479	5.4636	5.38656	5.42983	49.3739	42.8498	44.0287	42.3376	42.0302	44.2659	42.6376	42.9793	38.521	42.9396	41.0111	42.3172	136	chr17	15848231	15879210	1885	+	NM_000676	protein_coding	ADORA2	P30079	adenosine A2b receptor	ADORA2B
416	ADORA3	1	1	1	1	1	1	0	0	0	0	0	0	0	0	0	0	0	0	0	0	0	0	0	0	0	0	0	0	0	0	0	0	0	140	chr1	112042051	112046743	2868	-	NM_000677	protein_coding	A3AR|AD026|bA552M11.5	P27383	adenosine A3 receptor	ADORA3
417	ADPGK	0.956979	0.93368	0.975654	0.111504	0.0172065	0.410313	4.70198	4.63854	4.60298	4.66738	4.70759	4.74343	4.68843	4.68242	4.63996	4.67838	4.54948	4.52867	4.65486	4.61218	4.61332	24.2084	24.9225	25.7891	24.8894	24.6425	23.8603	24.7395	22.4058	22.2358	24.0859	23.5596	23.5944	83440	chr15	73043708	73076126	3099	-	NM_031284	protein_coding	2610017G09Rik|ADP-GK|DKFZp434B195	P9431	ADP-dependent glucokinase	ADPGK
418	ADPGK-AS1	1.01782	1.03824	1.02006	0.777195	0.671118	0.782351	1.03782	1.0633	1.09196	0.829962	1.21831	1.04769	1.0292	1.08827	0.958767	1.12866	1.07207	1.33355	1.01913	0.921645	1.06029	0.769453	1.31591	1.06734	1.04577	1.1245	0.940372	1.19327	1.10187	1.52988	1.02174	0.898871	1.09121	100287559	chr15	73075176	73090540	2730	+	NR_040107	lncRNA	.	.	ADPGK antisense RNA 1	ADPGK-AS1
419	ADPRH	0.977188	0.993721	1.01692	0.556702	0.877284	0.613082	0.14586	0.112569	0.136774	0.158523	0.253593	0.124082	0.0390403	0.0463888	0.135066	0.0847596	0.1805	0.0842768	0.153016	0.0797143	0.225174	0.114732	0.190274	0.0898298	0.0277505	0.0325604	0.0976804	0.0611458	0.133186	0.0609495	0.111167	0.0572952	0.169977	141	chr3	119298280	119308792	3682	+	NM_001291950	protein_coding	ARH1	P21478	ADP-ribosylarginine hydrolase	ADPRH
420	ADPRHL1	1.01159	0.910868	0.90043	0.832263	0.0791991	0.0227872	2.13831	2.15494	2.00363	2.30103	2.10567	2.03024	2.10201	2.08137	2.25332	2.06961	2.20677	1.96917	2.02525	1.9976	2.02178	3.897	3.276	3.08507	3.3074	3.22738	3.75679	3.21583	3.61467	2.93696	3.05653	3.0072	3.07697	113622	chr13	114076255	114107839	2178	-	NM_138430	protein_coding	ARH2	P7250	ADP-ribosylhydrolase like 1	ADPRHL1
421	ADPRHL2	1.05493	1.06967	1.01397	0.00376102	0.148105	0.734889	5.01209	5.08925	5.10926	5.05188	5.00263	4.99067	5.0024	5.10215	5.06562	5.10886	5.07994	5.20538	4.99053	5.19613	5.03229	31.9037	30.799	30.7971	31.1866	33.301	32.3912	33.6904	32.8072	36.1381	30.6551	35.8126	31.8836	54936	chr1	36554453	36559533	1691	+	NM_017825	protein_coding	ARH3|FLJ20446	P35665	ADP-ribosylhydrolase like 2	ADPRHL2
422	ADPRM	0.972779	0.868144	0.892437	0.635778	0.0824964	0.143985	2.8579	2.81809	2.65391	2.71573	2.98331	2.90035	2.81867	2.66528	2.8662	2.79678	2.93078	2.46017	2.8366	2.71807	2.57257	5.52151	6.85331	6.46674	6.08089	5.33562	6.27272	5.9816	6.6221	4.53735	6.11671	5.6049	4.97536	56985	chr17	10600927	10614875	1518	+	NM_020233	protein_coding	.	P33610	ADP-ribose/CDP-alcohol diphosphatase, manganese dependent	ADPRM
423	ADRA1A	1.01377	0.998191	0.984635	0.559218	0.929361	0.555611	0.0258818	0.0456078	0.0232694	0.0677901	6.57316e-05	0.03457	0	1.11832e-05	0.110073	0	0.0692642	0	0.0909069	0	0	0.0474336	0	0.0242569	0	0	0.0789403	0	0.049141	0	0.0646052	0	0	148	chr8	26605667	26722922	3946	-	NM_033303	protein_coding	ADRA1C|ADRA1L1|ALPHA1AAR	P14488	adrenoceptor alpha 1A	ADRA1A
424	ADRA1B	2.41208	2.63308	1.09162	9.67125e-07	7.59394e-07	0.0034741	1.08404	2.35432	2.48079	0.840617	1.03928	1.30224	1.11618	2.3489	2.35302	2.39131	2.32322	2.47389	2.49822	2.42086	2.52806	0.777377	1.03994	1.46635	1.17596	4.08894	4.09737	4.26773	4.00262	4.58342	4.63184	4.37216	4.78897	147	chr5	159343740	159400017	2254	+	NM_000679	protein_coding	ADRA1|ALPHA1BAR	P11772	adrenoceptor alpha 1B	ADRA1B
425	ADRA1D	1	1	1	1	1	1	0	0	0	0	0	0	0	0	0	0	0	0	0	0	0	0	0	0	0	0	0	0	0	0	0	0	0	146	chr20	4201278	4229659	2666	-	NM_000678	protein_coding	ADRA1|ADRA1A|ADRA1R|ALPHA1|DAR|dJ779E11.2	P4529	adrenoceptor alpha 1D	ADRA1D
426	ADRA2A	0.986475	0.990789	1.00437	0.355843	0.540417	0.355883	0.0196476	2.64434e-06	0.00629799	1.79227e-05	0.0770172	0	0	3.03987e-06	6.48211e-06	0	1.05538e-06	0	9.38986e-06	0.0250194	0	0	0.0541365	0	0	0	0	0	0	0	0	0.0176536	0	150	chr10	112836790	112840662	3873	+	NM_000681	protein_coding	ADRA2|ADRA2R|ADRAR|ALPHA2AAR|ZNF32	P26728	adrenoceptor alpha 2A	ADRA2A
427	ADRA2B	1.00879	0.999998	0.991288	0.356048	0.288923	0.355935	4.35995e-06	0.0126253	1.14386e-06	8.73329e-06	8.70649e-06	0	0	1.48125e-06	0.0498494	0	5.1426e-07	0	4.57544e-06	0	0	0	0	0	0	0	0.0349746	0	0	0	0	0	0	151	chr2	96778623	96781984	3362	-	NM_000682	protein_coding	ADRA2L1|ADRA2RL1|ADRARL1|ALPHA2BAR	P18391	adrenoceptor alpha 2B	ADRA2B
428	ADRA2C	1.04617	1.02851	0.983116	0.05769	0.476399	0.671565	0.039736	0.104855	0.0802889	0.0411348	0.000159166	0.0413573	0.075311	0.080108	0.171921	0.0826089	0.0826462	0	0.20826	0.10249	0	0.0283742	0	0.0290885	0.0539985	0.0569555	0.126061	0.0594905	0.0589084	0	0.154477	0.0741356	0	152	chr4	3768296	3770253	1958	+	NM_000683	protein_coding	ADRA2L2|ADRA2RL2|ADRARL2|ALPHA2CAR	P16517	adrenoceptor alpha 2C	ADRA2C
429	ADRB1	1.14261	1.05536	0.923637	0.0137039	0.122581	0.1015	0.436742	0.629078	0.514477	0.4637	0.360048	0.447268	0.473193	0.760819	0.605268	0.58981	0.551436	0.470924	0.443497	0.594505	0.544046	0.375054	0.280017	0.363506	0.390262	0.693507	0.519538	0.508125	0.465279	0.389343	0.357845	0.512411	0.460724	153	chr10	115803806	115806667	2862	+	NM_000684	protein_coding	ADRB1R|B1AR|BETA1AR|RHR	P19510	adrenoceptor beta 1	ADRB1
430	ADRB2	0.964288	0.923859	0.958073	0.2972	0.00479499	0.193256	6.02509	5.97263	5.91084	6.08891	6.02535	6.00014	5.98374	5.97604	5.88569	5.94631	6.07589	5.88488	5.92786	5.90288	5.92728	66.5159	63.6057	63.0129	62.5473	61.8587	57.9488	60.9937	66.4244	58.492	59.617	59.0899	60.1538	154	chr5	148206156	148208197	2042	+	NM_000024	protein_coding	ADRB2R|ADRBR|B2AR|BAR|BETA2AR	P33894	adrenoceptor beta 2	ADRB2
431	ADRB3	1	1	1	1	1	1	0	0	0	0	0	0	0	0	0	0	0	0	0	0	0	0	0	0	0	0	0	0	0	0	0	0	0	155	chr8	37820514	37824184	2646	-	NM_000025	protein_coding	BETA3AR|FLJ99960	P20883	adrenoceptor beta 3	ADRB3
432	ADRBK1	1.00029	1.02558	1.02529	0.992669	0.476553	0.375636	4.51544	4.51586	4.55188	4.48478	4.54	4.42755	4.60352	4.52547	4.54814	4.53966	4.44799	4.56523	4.52025	4.62753	4.49083	21.2107	22.0791	20.5214	23.4089	21.9993	22.3279	22.3798	20.8158	22.8287	21.8513	23.8203	21.5922	.	chr11	67033905	67054029	3444	+	NM_001619	.	BARK1|BETA-ARK1|FLJ16718|GRK2	P18703	.	ADRBK1
433	ADRBK2	0.985442	0.969928	0.984256	0.576584	0.375569	0.581345	1.37733	1.35617	1.33328	1.39082	1.31645	1.34394	1.4543	1.3186	1.37564	1.39841	1.33057	1.38531	1.2962	1.25152	1.39504	1.60833	1.47724	1.53861	1.74765	1.49198	1.58982	1.64532	1.51422	1.62374	1.44892	1.3876	1.63836	.	chr22	25960861	26125258	9055	+	NM_005160	.	BARK2|GRK3	P24581	.	ADRBK2
434	ADRM1	1.0441	1.05754	1.01288	0.119981	0.110939	0.659386	7.76296	7.82521	7.84367	7.72486	7.77697	7.71546	7.83155	7.84383	7.76737	7.8688	7.8189	7.90861	7.76121	7.81527	7.88493	208.801	216.524	209.199	227.751	228.413	216.225	234.015	224.69	240.92	215.008	225.205	236.546	11047	chr20	60877952	60883918	1476	+	NM_001281437	protein_coding	ARM1|GP110|MGC29536|Rpn13	P19236	adhesion regulating molecule 1	ADRM1
435	ADSL	1.02894	0.99884	0.970747	0.268436	0.96726	0.234362	6.5107	6.55186	6.50903	6.44126	6.57844	6.52282	6.49692	6.51296	6.57629	6.52763	6.58916	6.57069	6.44745	6.53029	6.48469	85.1825	93.7865	90.9621	89.697	90.1991	94.1414	91.7576	95.2331	94.6976	85.8951	91.8267	88.9966	158	chr22	40742504	40762575	1563	+	NM_001123378	protein_coding	AMPS|ASASE|ASL	P10122	adenylosuccinate lyase	ADSL
436	ADSS	1.04762	0.980594	0.936023	0.0325538	0.497485	0.0316118	5.33424	5.40135	5.30597	5.36586	5.27096	5.35919	5.33899	5.36529	5.4174	5.41128	5.41082	5.24596	5.38659	5.32848	5.25836	39.903	37.2976	40.0509	39.6441	40.1638	41.6119	41.7814	41.522	37.2041	40.6562	39.3525	37.4636	159	chr1	244571794	244615436	2782	-	NM_001126	protein_coding	ADEH|MGC20404	P5122	adenylosuccinate synthase	ADSS
437	ADSSL1	0.981792	0.976894	0.995011	0.72339	0.728675	0.913046	0.163241	0.136731	0.129514	0.332101	0.17535	0	0.125804	0.133461	0.0998783	0.17496	0.137641	0.279172	0.0621872	0	0.161121	0.256543	0.127715	0	0.0917533	0.096703	0.0712902	0.129936	0.100027	0.21519	0.0436144	0	0.119026	122622	chr14	105190534	105213647	2078	+	NM_152328	protein_coding	FLJ38602	P26010	adenylosuccinate synthase like 1	ADSSL1
438	ADTRP	0.884207	0.788048	0.891248	0.105958	0.040708	0.267934	1.23408	1.05653	0.890431	1.3603	1.10795	1.12488	1.32516	1.13069	0.846218	1.09499	1.13499	1.16718	0.554495	0.86512	0.910008	1.55545	1.14534	1.18097	1.51157	1.1879	0.794774	1.14269	1.19556	1.25438	0.465298	0.825898	0.884303	84830	chr6	11713888	11779280	1858	-	NM_032744	protein_coding	.	P35797	androgen dependent TFPI regulating protein	ADTRP
439	AEBP1	1.00638	1.01253	1.00611	0.801724	0.550052	0.787421	0.058124	0.0673031	0.0760944	0.108507	0.0188168	0.0187322	0.084248	0.0722887	0.13748	0.0188099	0.0377845	0.0978972	0.025373	0.0925547	0.0873676	0.0771119	0.0127929	0.0130731	0.0605688	0.0512529	0.0995589	0.0133457	0.0265062	0.0709829	0.017533	0.0667273	0.0629512	165	chr7	44143960	44154164	4086	+	NM_001129	protein_coding	ACLP|FLJ33612	P1546	AE binding protein 1	AEBP1
440	AEBP2	1.0204	1.01479	0.994502	0.526086	0.436308	0.846823	3.3794	3.40853	3.40058	3.32167	3.37014	3.39999	3.42378	3.46891	3.43299	3.29632	3.43002	3.39048	3.43724	3.39716	3.37673	8.9216	9.26142	9.55699	9.7729	10.0584	9.77081	8.87379	9.77323	9.55221	9.78935	9.57702	9.43458	121536	chr12	19592608	19675173	5246	+	NM_001114176	protein_coding	MGC17922	P14550	AE binding protein 2	AEBP2
441	AEN	0.882096	0.867267	0.983189	0.00461641	0.00222998	0.660949	4.84411	4.66312	4.63866	4.87076	4.86524	4.78548	4.85334	4.6365	4.76831	4.59508	4.64673	4.66351	4.70781	4.53105	4.64643	28.0277	27.9174	26.5814	28.0237	23.8388	26.1738	23.2979	24.0379	24.5113	25.0233	22.2184	24.166	64782	chr15	89164527	89175512	3116	+	NM_022767	protein_coding	FLJ12484|FLJ12562|ISG20L1|pp12744	P1043	apoptosis enhancing nuclease	AEN
442	AES	1.03454	1.06393	1.02841	0.257301	0.118703	0.362181	6.91884	6.96783	7.00824	6.93907	6.86783	6.86019	7.00352	6.97642	6.95622	7.01661	6.9204	7.09381	6.92673	6.98205	7.02519	120.696	114.833	115.19	127.853	124.749	122.804	129.182	120.07	136.523	120.136	125.961	129.898	166	chr19	3052908	3062964	1940	-	NM_198970	protein_coding	AES-1|AES-2|ESP1|GRG|GRG5|TLE5	P7999	amino-terminal enhancer of split	AES
443	AFAP1	0.802784	0.837545	1.0433	0.000286183	0.00173431	0.368247	4.81587	4.49895	4.56011	4.82604	4.81743	4.76464	4.85393	4.59465	4.39681	4.47954	4.51779	4.42508	4.65588	4.57431	4.57564	27.1434	26.9763	26.1858	28.0341	23.1288	20.0029	21.428	21.8972	20.6273	24.104	22.9235	22.9606	60312	chr4	7760440	7941653	7770	-	NM_198595	protein_coding	AFAP|AFAP-110|FLJ56849	P11855	actin filament associated protein 1	AFAP1
444	AFAP1-AS1	0.923067	0.951499	1.0308	0.0607546	0.258138	0.510362	3.71684	3.60134	3.64511	3.77172	3.6655	3.65609	3.76983	3.55257	3.61846	3.52714	3.70089	3.58741	3.73914	3.53487	3.7092	12.5553	11.5918	11.6077	12.6933	10.718	11.2475	10.5881	11.9982	11.0974	12.3003	10.638	12.1391	84740	chr4	7755817	7780654	6794	+	NR_026892	lncRNA	.	.	AFAP1 antisense RNA 1	AFAP1-AS1
445	AFAP1L1	1.21781	1.1661	0.957535	0.000288117	0.00133354	0.0237473	2.74326	3.02755	2.96495	2.64418	2.82151	2.71996	2.78122	3.04993	3.0375	2.98703	3.03495	2.94748	3.01108	2.94631	2.9539	5.20358	6.01679	5.58916	5.9006	7.27171	7.18943	6.96594	7.19273	6.76014	7.03136	6.73698	6.78213	134265	chr5	148651401	148721367	4212	+	NM_001146337	protein_coding	FLJ36748|MGC149773	P7959	actin filament associated protein 1 like 1	AFAP1L1
446	AFAP1L2	1.03561	1.05611	1.01979	0.443287	0.11308	0.615099	1.50467	1.55515	1.58343	1.39022	1.55021	1.53607	1.53634	1.62741	1.46815	1.46828	1.64683	1.61156	1.55991	1.62784	1.53236	1.60601	1.91196	1.90024	1.90905	2.08661	1.7609	1.77738	2.1304	2.07009	1.93954	2.09962	1.90252	84632	chr10	116054583	116164537	4339	-	NM_001287824	protein_coding	FLJ14564|KIAA1914|XB130	P23788	actin filament associated protein 1 like 2	AFAP1L2
447	AFF1	0.911502	0.911225	0.999696	0.000673404	0.0286841	0.99364	3.7625	3.62882	3.62838	3.76911	3.74899	3.75428	3.77744	3.6454	3.66362	3.56829	3.63617	3.53375	3.74546	3.66063	3.56397	12.5303	12.3429	12.4956	12.7659	11.4969	11.637	10.9232	11.4279	10.6567	12.3585	11.6972	10.8823	4299	chr4	87856154	88062191	9915	+	NM_001166693	protein_coding	AF4|MGC134969|MLLT2|PBM1	P8490	AF4/FMR2 family member 1	AFF1
448	AFF2	1.00743	1.00639	0.998962	0.291902	0.318983	0.888756	0.0137853	0.0244697	0.0229718	0.00551184	0.00610646	0.0269027	0.0165137	0.026477	0.00596614	0.0217152	0.0434725	0.00801176	0.0365029	0.0151855	0.0319969	0.00371092	0.00411738	0.0188268	0.0116365	0.0184645	0.00409939	0.015359	0.0305631	0.00569176	0.0254022	0.0107011	0.0226585	2334	chrX	147582139	148082193	13851	+	NM_002025	protein_coding	FMR2|FRAXE|MRX2|OX19	P22343	AF4/FMR2 family member 2	AFF2
449	AFF3	0.973478	1.03781	1.06609	0.401571	0.376069	0.160737	2.94871	2.90993	3.00225	3.02078	2.88059	2.93448	2.95547	2.95452	2.91956	2.81451	2.94682	2.8952	3.12276	2.98133	3.0005	7.05741	6.31011	6.64554	6.78587	6.74213	6.54597	6.06947	6.70716	6.48481	7.67811	6.92716	7.03766	3899	chr2	100163716	100759037	8212	-	NM_002285	protein_coding	LAF4|MLLT2-like	P16266	AF4/FMR2 family member 3	AFF3
450	AFF4	0.985432	1.00664	1.02152	0.509924	0.839882	0.555097	4.91436	4.89319	4.92391	4.95855	4.88055	4.91851	4.89866	4.94395	4.88872	4.8242	4.91321	4.81211	5.01731	4.92101	4.93784	29.8449	28.2205	29.2457	28.9522	29.7388	28.538	27.4799	29.1175	27.2806	31.2512	29.4221	29.7982	27125	chr5	132211071	132299354	9580	-	NM_014423	protein_coding	AF5Q31|MCEF|MGC75036	P3437	AF4/FMR2 family member 4	AFF4
451	AFG3L1P	0.991686	0.982259	0.990494	0.902014	0.738554	0.832943	3.49557	3.48352	3.46974	3.63443	3.58229	3.42505	3.31886	3.36058	3.63893	3.49125	3.42851	3.48272	3.4367	3.45355	3.50504	11.3263	10.8883	9.74201	9.01873	9.25799	11.4239	10.3015	9.76188	10.2492	9.78448	9.99907	10.4051	172	chr16	90038988	90067195	6054	+	NR_003227	misc_RNA	.	.	AFG3 like matrix AAA peptidase subunit 1, pseudogene	AFG3L1P
452	AFG3L2	1.02077	0.974744	0.954907	0.514683	0.294243	0.107161	5.36581	5.39547	5.3289	5.32687	5.44851	5.33555	5.34895	5.43003	5.32816	5.46428	5.35523	5.32496	5.29105	5.34662	5.35219	38.8109	42.3176	39.3837	39.9256	42.0532	39.0549	43.3815	39.9146	39.353	37.9855	39.8631	40.0472	10939	chr18	12328943	12377275	3209	-	NM_006796	protein_coding	FLJ25993|SCA28	P8531	AFG3 like matrix AAA peptidase subunit 2	AFG3L2
453	AFM	1.01442	0.999996	0.985779	0.356012	0.288923	0.355897	7.25186e-06	0.0206663	1.90258e-06	1.4526e-05	1.44814e-05	0	0	2.46375e-06	5.25361e-06	0.0809379	8.55364e-07	0	7.61028e-06	0	0	0	0	0	0	0	0	0.0581803	0	0	0	0	0	173	chr4	74347462	74369718	1997	+	NM_001133	protein_coding	ALB2|ALBA|ALF|MGC125338|MGC125339	P31981	afamin	AFM
454	AFMID	0.986969	1.05534	1.06927	0.849219	0.454928	0.218052	3.88487	3.86595	3.96257	3.70167	4.0792	3.93462	3.79555	3.74998	3.94685	3.93161	3.82644	3.91682	4.0253	3.83133	4.06521	11.9067	15.775	14.2926	12.9422	12.4359	14.3781	14.3371	13.1798	14.2004	15.2177	13.2932	15.8163	125061	chr17	76183398	76203782	2145	+	NM_001010982	protein_coding	DKFZp686F03259|KF|MGC167063	P26778	arylformamidase	AFMID
455	AFP	1.0023	0.970542	0.968313	0.91601	0.094464	0.153392	0.0565063	0.0598231	0.0133683	0.0392928	0.03912	0.0395405	0.106876	0.0766294	0.0430746	0	0.117021	0	0.0527455	0	0	0.0271271	0.0270069	0.0277926	0.0773786	0.054423	0.0301213	0	0.0844338	0	0.0369287	0	0	174	chr4	74301936	74321502	2039	+	NM_001134	protein_coding	FETA|HPAFP	P11824	alpha fetoprotein	AFP
456	AFTPH	0.972137	0.937863	0.964743	0.443748	0.0344682	0.407151	3.40646	3.36569	3.31391	3.42591	3.36371	3.41292	3.42242	3.27469	3.35498	3.32755	3.49611	3.28942	3.40081	3.30613	3.25519	9.66705	9.21633	9.65204	9.76244	8.66524	9.20373	9.08924	10.2783	8.83888	9.5204	8.93048	8.59207	54812	chr2	64751439	64820138	5240	+	NM_001002243	protein_coding	FLJ20080|FLJ23793|MGC33965|Nbla10388	P8758	aftiphilin	AFTPH
457	AGA	0.962468	1.02089	1.0607	0.37175	0.639316	0.347315	2.85272	2.79753	2.88255	2.86177	2.85963	2.84697	2.8424	2.83767	2.67247	2.7323	2.93375	2.98524	2.81766	2.97316	2.73917	6.21662	6.20609	6.19556	6.1987	6.13984	5.35799	5.67739	6.63774	6.96465	6.02328	6.88156	5.70644	175	chr4	178351929	178363657	2148	-	NM_001171988	protein_coding	AGU|ASRG|GA	P26609	aspartylglucosaminidase	AGA
458	AGAP1	0.959187	1.01172	1.05477	0.297886	0.786275	0.257552	3.28875	3.22864	3.30557	3.32754	3.19081	3.27584	3.35543	3.30123	3.11892	3.22232	3.26566	3.22836	3.39579	3.2156	3.37325	8.96424	8.06188	8.68652	9.27372	8.84504	7.6631	8.37936	8.6132	8.43052	9.4847	8.32628	9.40814	116987	chr2	236402733	237040444	11367	+	NM_014914	protein_coding	CENTG2|GGAP1|KIAA1099|MGC71657	P29841	ArfGAP with GTPase domain, ankyrin repeat and PH domain 1	AGAP1
459	AGAP1-IT1	1.12518	1.01815	0.904885	0.383758	0.899015	0.473208	0.463946	0.634095	0.489901	0.71931	0.620242	0.296345	0.144932	0.737043	0.886398	0.302476	0.545262	0.686564	0.5195	0.654884	0	0.641037	0.532304	0.228069	0.106799	0.665831	0.8463	0.23533	0.459023	0.61372	0.431193	0.577113	0	100506749	chr2	236414395	236416210	664	+	NR_131900	lncRNA	.	.	AGAP1 intronic transcript 1	AGAP1-IT1
460	AGAP11	1.09948	1.01523	0.923371	0.0632594	0.771478	0.216436	0.202351	0.339176	0.224158	0.187107	0.140736	0.207852	0.270675	0.439376	0.379029	0.335838	0.190984	0.127923	0.353706	0.310742	0.0860752	0.136647	0.100913	0.154992	0.207539	0.355492	0.299448	0.263822	0.141433	0.0939424	0.276428	0.241641	0.0622033	119385	chr10	88730498	88769960	3155	+	NM_133447	protein_coding	KIAA1975	P20595	ArfGAP with GTPase domain, ankyrin repeat and PH domain 11	AGAP11
461	AGAP2	0.988061	1.04848	1.06115	0.78435	0.370661	0.176114	0.549592	0.532264	0.617896	0.578116	0.680568	0.477218	0.450972	0.48106	0.514428	0.613181	0.516987	0.601701	0.488052	0.706304	0.666182	0.488151	0.597499	0.39211	0.369045	0.39505	0.426831	0.532871	0.430703	0.521521	0.400311	0.634451	0.589998	116986	chr12	58118076	58135944	6088	-	NM_014770	protein_coding	CENTG1|FLJ16430|GGAP2|KIAA0167|PIKE	P30070	ArfGAP with GTPase domain, ankyrin repeat and PH domain 2	AGAP2
462	AGAP2-AS1	1.15078	1.19374	1.03733	0.0382725	0.00705309	0.544837	3.66476	3.86738	3.92025	3.73888	3.64497	3.57925	3.69115	3.98985	3.75958	3.96063	3.74177	3.84135	4.01634	3.81807	3.99437	12.2462	11.4103	10.9538	11.9689	14.8674	12.5056	14.6471	12.3716	13.4252	15.1183	13.1616	15.0101	100130776	chr12	58120023	58122139	1531	+	NR_027032	lncRNA	.	.	AGAP2 antisense RNA 1	AGAP2-AS1
463	AGAP3	1.00172	1.04462	1.04283	0.960791	0.311802	0.146141	4.99684	4.99932	5.05982	5.07103	5.05087	4.85888	4.99723	4.98377	5.03539	4.99416	4.98331	5.1449	5.00413	5.00921	5.07644	32.3455	31.883	28.0211	31.0707	30.5985	31.6992	31.0401	30.6168	34.6133	30.956	31.3406	32.9038	116988	chr7	150782918	150841523	5606	+	NM_001281300	protein_coding	CENTG3|CRAG|FLJ16146|FLJ34452|MRIP-1	P30275	ArfGAP with GTPase domain, ankyrin repeat and PH domain 3	AGAP3
464	AGAP4	1.00168	1.02198	1.02026	0.97749	0.702601	0.732017	2.07633	2.07875	2.10769	2.20367	2.13059	1.98013	1.97765	1.9805	2.05489	2.02188	2.2434	1.98731	2.18009	2.03906	2.21208	3.57709	3.35076	2.94562	2.95187	2.94187	3.14527	3.07871	3.73334	2.98659	3.51659	3.12386	3.65119	119016	chr10	46321040	46349325	2737	-	NM_001276343	protein_coding	CTGLF1|MRIP2	P15015	ArfGAP with GTPase domain, ankyrin repeat and PH domain 4	AGAP4
465	AGAP5	0.95218	0.962848	1.0112	0.413701	0.632289	0.87479	1.81339	1.7427	1.75877	1.94397	1.64024	1.76799	1.88289	1.64866	1.73114	1.86068	1.72217	1.76851	1.58254	1.97771	1.67616	2.82483	2.09796	2.40605	2.69941	2.13213	2.31256	2.64611	2.29813	2.42409	1.98518	2.9508	2.20757	729092	chr10	75434033	75457554	2426	-	NM_001144000	protein_coding	CTGLF2	P24360	ArfGAP with GTPase domain, ankyrin repeat and PH domain 5	AGAP5
466	AGAP6	1.02016	1.02278	1.00257	0.758427	0.718009	0.965865	3.37715	3.40595	3.40965	3.55595	3.34452	3.32354	3.26765	3.29604	3.54586	3.45972	3.30674	3.33996	3.56531	3.3863	3.33456	10.6743	9.08048	9.01212	8.6689	8.80931	10.6479	10.0564	8.89082	9.18964	10.7919	9.49772	9.13433	414189	chr10	51748078	51770259	2772	+	NM_001077665	protein_coding	CTGLF3|bA324H6.1	P139	ArfGAP with GTPase domain, ankyrin repeat and PH domain 6	AGAP6
467	AGAP7P	1.01546	0.921969	0.907934	0.827839	0.238031	0.254748	0.569205	0.591336	0.451995	0.69222	0.606583	0.453953	0.512598	0.583849	0.488328	0.45973	0.80704	0.319748	0.355077	0.639068	0.47221	0.610523	0.517864	0.369839	0.428822	0.498048	0.401304	0.377934	0.749274	0.250807	0.277238	0.559918	0.389694	653268	chr10	51464144	51486327	2407	-	NR_126580	misc_RNA	.	.	ArfGAP with GTPase domain, ankyrin repeat and PH domain 7, pseudogene	AGAP7P
468	AGAP9	1.02453	1.00782	0.983692	0.134519	0.356553	0.342296	1.60689e-05	0.0349798	0.0112577	3.2187e-05	3.20883e-05	0	0	5.45926e-06	0.07158	0	0.0666736	0	0.044513	0	0	0	0	0	0	0	0.0506224	0	0.0472613	0	0.031083	0	0	642517	chr10	47191844	48237508	4774	-	NM_001190810	protein_coding	AGAP-9|CTGLF6|FLJ00312|bA301J7.2	P23632	ArfGAP with GTPase domain, ankyrin repeat and PH domain 9	AGAP9
469	AGBL1	1	1	1	1	1	1	0	0	0	0	0	0	0	0	0	0	0	0	0	0	0	0	0	0	0	0	0	0	0	0	0	0	0	123624	chr15	86685242	87572283	3493	+	NM_152336	protein_coding	FLJ32310|MGC149239	P31080	ATP/GTP binding protein-like 1	AGBL1
470	AGBL1-AS1	1	1	1	1	1	1	0	0	0	0	0	0	0	0	0	0	0	0	0	0	0	0	0	0	0	0	0	0	0	0	0	0	0	727915	chr15	86840065	86860199	904	-	NR_046012	lncRNA	.	.	AGBL1 antisense RNA 1	AGBL1-AS1
471	AGBL2	0.999278	1.00066	1.00138	0.970603	0.971963	0.955711	0.0675694	0.0665277	0.06852	0.0836735	0.06302	0.083965	0.0391503	0.0211182	0.135118	0.0429761	0.0643418	0.0285436	0.112132	0.105621	0.0254517	0.0588688	0.0439497	0.0599378	0.0277752	0.0146845	0.0977639	0.0305999	0.0455658	0.0203368	0.0802881	0.0764705	0.0180399	79841	chr11	47681143	47736928	3593	-	NM_024783	protein_coding	FLJ23598	P33260	ATP/GTP binding protein-like 2	AGBL2
472	AGBL3	0.908893	0.985105	1.08385	0.00673505	0.732576	0.0851567	0.235888	0.0980711	0.214238	0.203619	0.293858	0.166108	0.276201	0.124229	0.115561	0.0650584	0.086671	0.244537	0.341303	0.158323	0.101332	0.149818	0.2237	0.122047	0.212094	0.0897016	0.08294	0.0467327	0.0618537	0.186342	0.265618	0.116781	0.0734673	340351	chr7	134671259	134820530	3533	+	NM_178563	protein_coding	FLJ12983|MGC32955	P7134	ATP/GTP binding protein-like 3	AGBL3
473	AGBL4	0.993477	0.981466	0.987911	0.835534	0.38421	0.635157	0.0762068	0.0667647	0.0492175	0.051617	0.0762333	0.149973	0.0239422	2.30378e-05	0.0838234	0.15198	0.026487	0.0347524	0.0351488	0.0651728	0.0615143	0.0358127	0.0534754	0.109564	0.0169299	0	0.0595191	0.11191	0.018505	0.0247761	0.0244099	0.0465826	0.0439731	84871	chr1	48998527	50489626	2988	-	NM_032785	protein_coding	CCP6|FLJ14442	P30520	ATP/GTP binding protein-like 4	AGBL4
474	AGBL4-IT1	1	1	1	1	1	1	0	0	0	0	0	0	0	0	0	0	0	0	0	0	0	0	0	0	0	0	0	0	0	0	0	0	0	100874313	chr1	49839873	49937757	514	-	NR_046839	lncRNA	.	.	AGBL4 intronic transcript 1	AGBL4-IT1
475	AGBL5	0.943515	0.988747	1.04794	0.489201	0.882197	0.489961	2.81175	2.72787	2.79543	2.87332	2.98894	2.56272	2.78887	2.6978	2.55265	2.89902	2.74086	2.74316	2.75092	2.71469	2.95943	6.27572	6.88409	4.90877	5.93626	5.48008	4.8512	6.49372	5.68183	5.73529	5.70595	5.58945	6.81069	60509	chr2	27274491	27293490	3284	+	NM_021831	protein_coding	FLJ21839	P9335	ATP/GTP binding protein-like 5	AGBL5
476	AGBL5-AS1	0.849366	0.986175	1.16107	0.167544	0.936754	0.3559	0.235591	4.9414e-05	0.215506	0.307874	0.557458	0	0	5.68047e-05	0.000121127	0	1.97216e-05	0	0.00017546	0	0.717493	0.235666	0.468366	0	0	0	0	0	0	0	0	0	0.646716	100874031	chr2	27272551	27273132	407	-	NR_046730	lncRNA	.	.	AGBL5 antisense RNA 1	AGBL5-AS1
477	AGER	1.10924	1.08585	0.97891	0.327917	0.138413	0.829285	1.09356	1.24313	1.21238	1.06598	0.964791	1.14588	1.18767	0.98075	1.55359	1.12391	1.25106	1.09248	1.30547	1.16228	1.27896	1.08319	0.942139	1.21295	1.28363	0.971829	1.93032	1.18648	1.37947	1.14114	1.46524	1.24392	1.43385	177	chr6	32148745	32152099	1680	-	NM_001206966_2	protein_coding	MGC22357|RAGE	P13212	advanced glycosylation end product-specific receptor	AGER
478	AGFG1	1.02941	1.01786	0.988777	0.34425	0.583361	0.778313	3.58212	3.62395	3.60766	3.5433	3.59002	3.61817	3.576	3.60839	3.64022	3.53081	3.71059	3.52192	3.70393	3.55913	3.63876	10.5681	10.9499	11.2806	10.9727	11.1806	11.4341	10.6169	12.086	10.5605	11.9799	10.8346	11.513	3267	chr2	228336888	228425938	8824	+	NM_004504	protein_coding	DKFZp686I15205|HRB|MGC116938|MGC116940|RAB|RIP	P5739	ArfGAP with FG repeats 1	AGFG1
479	AGFG2	1.31694	1.33505	1.01375	0.000355366	0.00149804	0.778888	2.40001	2.7972	2.81691	2.5192	2.38483	2.32063	2.36776	2.77299	2.8578	2.84633	2.70657	2.73456	2.93548	2.69985	2.88422	4.69066	4.18377	3.99599	4.18126	5.82712	6.23098	6.22436	5.52493	5.69423	6.62282	5.52141	6.41353	3268	chr7	100136834	100165843	4811	+	NM_006076	protein_coding	HRBL|RABR	P35096	ArfGAP with FG repeats 2	AGFG2
480	AGGF1	0.965659	0.933467	0.966663	0.0618352	0.11202	0.37147	3.54742	3.49701	3.44809	3.58359	3.53765	3.57303	3.4937	3.51254	3.48246	3.50912	3.48364	3.30688	3.47945	3.55316	3.44191	10.8985	10.5252	10.9023	10.3084	10.3977	10.1461	10.4424	10.1811	8.9604	10.109	10.7847	9.91743	55109	chr5	76326210	76361058	4508	+	NM_018046	protein_coding	FLJ10283|GPATC7|GPATCH7|HSU84971|HUS84971|VG5Q	P4402	angiogenic factor with G-patch and FHA domains 1	AGGF1
481	AGK	1.00317	0.970509	0.967441	0.926186	0.248483	0.37057	3.70472	3.70929	3.66153	3.72765	3.71352	3.63846	3.73716	3.70339	3.65373	3.64857	3.82441	3.696	3.71031	3.60028	3.6368	12.146	12.018	11.4546	12.3874	12.0096	11.5505	11.6049	13.1602	12.0424	12.0365	11.1776	11.4971	55750	chr7	141251078	141354209	2925	+	NM_018238	protein_coding	FLJ10842|MULK	P5540	acylglycerol kinase	AGK
482	AGL	0.999689	0.987906	0.988213	0.992204	0.739162	0.707088	2.66584	2.66539	2.64828	2.66743	2.58153	2.75592	2.65312	2.69333	2.5955	2.65749	2.71249	2.53959	2.68003	2.67314	2.69503	5.30798	4.94281	5.75543	5.31314	5.4603	5.0283	5.33877	5.55181	4.849	5.38495	5.40176	5.5031	178	chr1	100315640	100389579	8238	+	NM_000642	protein_coding	GDE	P26368	amylo-alpha-1, 6-glucosidase, 4-alpha-glucanotransferase	AGL
483	AGMAT	1.04259	1.03782	0.995428	0.259789	0.427232	0.914604	2.3523	2.41247	2.40585	2.35289	2.41318	2.3936	2.24364	2.45847	2.4112	2.45409	2.32198	2.44212	2.48683	2.25164	2.43186	4.07325	4.29027	4.25512	3.75294	4.49001	4.30603	4.50409	3.99812	4.46482	4.58565	3.77968	4.41794	79814	chr1	15898194	15911605	3154	-	NM_024758	protein_coding	FLJ23384	P4018	agmatinase	AGMAT
484	AGMO	1.06264	1.0332	0.972291	0.378275	0.491265	0.664023	0.322619	0.410273	0.369732	0.437656	0.207973	0.291761	0.343458	0.260665	0.475668	0.295489	0.584822	0.311444	0.310973	0.360915	0.488227	0.350995	0.152871	0.224167	0.270296	0.197607	0.389261	0.229066	0.499611	0.243231	0.239094	0.285819	0.404914	392636	chr7	15239943	15601640	2475	-	NM_001004320	protein_coding	.	P26837	alkylglycerol monooxygenase	AGMO
485	AGO1	0.964954	0.970174	1.00541	0.342688	0.569445	0.917509	2.86063	2.80916	2.81694	2.86651	2.95572	2.78591	2.82891	2.87399	2.85147	2.78325	2.72308	2.62361	2.92773	2.84351	2.8554	6.24064	6.70354	5.89737	6.13164	6.32198	6.19853	5.91701	5.59992	5.20098	6.5808	6.20467	6.26833	26523	chr1	36348810	36389899	7478	+	NM_012199	protein_coding	.	P25310	argonaute 1, RISC catalytic component	AGO1
486	AGO2	0.907533	0.95664	1.05411	0.0377113	0.541492	0.478637	5.30916	5.16918	5.24521	5.27568	5.41926	5.24564	5.28987	5.23421	5.1514	5.07682	5.20924	4.95547	5.32956	5.2604	5.39727	37.4254	41.4516	36.9437	38.2824	36.5887	34.4358	32.9325	35.9769	30.2399	39.0428	37.4918	41.3467	27161	chr8	141541264	141645646	3500	-	NM_012154	protein_coding	.	P3242	argonaute RISC catalytic component 2	AGO2
487	AGO3	0.944063	0.95673	1.01342	0.358686	0.499459	0.782813	2.54482	2.46177	2.481	2.63621	2.59825	2.60659	2.31565	2.40246	2.47391	2.39359	2.57012	2.58814	2.54596	2.39354	2.38509	5.17483	5.01432	5.09113	3.99658	4.28068	4.54144	4.2791	4.9362	5.04713	4.81888	4.27388	4.24601	192669	chr1	36396683	36522063	3645	+	NM_177422	protein_coding	.	P33884	argonaute 3, RISC catalytic component	AGO3
488	AGO4	1.11178	1.13871	1.02423	0.0319529	0.00929345	0.579936	1.32151	1.47438	1.50892	1.23916	1.32192	1.33867	1.38257	1.39639	1.59761	1.46148	1.43392	1.48207	1.61693	1.4427	1.48792	1.34744	1.48616	1.52936	1.6147	1.62996	2.02049	1.76383	1.70093	1.8061	2.05854	1.72609	1.81406	192670	chr1	36273828	36323490	7060	+	NM_017629	protein_coding	.	P27582	argonaute 4, RISC catalytic component	AGO4
489	AGPAT1	0.995737	0.996656	1.00092	0.900592	0.920011	0.970124	5.85475	5.84859	5.84992	5.94561	5.87316	5.75181	5.84174	5.77927	5.8896	5.83957	5.88323	5.85681	5.90735	5.79749	5.83583	60.1319	57.1372	52.8905	56.5904	53.8437	58.1105	56.5723	57.9955	57.343	58.7632	54.8564	56.3966	10554	chr6	32135983	32145888	2368	-	NM_032741_1	protein_coding	1-AGPAT1|G15|LPAAT-alpha|LPAATA|MGC4007|MGC5423	P11597	1-acylglycerol-3-phosphate O-acyltransferase 1	AGPAT1
490	AGPAT2	1.00901	1.07105	1.06148	0.840144	0.11656	0.261645	5.54578	5.55872	5.6448	5.56967	5.55029	5.46088	5.59863	5.67736	5.50914	5.60501	5.43127	5.73744	5.53034	5.61722	5.68588	46.1073	45.4791	43.0489	47.6586	50.1045	44.4077	47.9317	42.1286	52.7049	45.0186	48.2936	50.7275	10555	chr9	139567595	139581911	1548	-	NM_006412	protein_coding	1-AGPAT2|BSCL|BSCL1|LPAAB|LPAAT-beta	P34110	1-acylglycerol-3-phosphate O-acyltransferase 2	AGPAT2
491	AGPAT3	1.00779	1.04931	1.04119	0.666579	0.0836204	0.121112	3.90212	3.91331	3.97155	3.94902	3.90756	3.86002	3.89043	3.9002	3.87295	3.93565	3.94335	4.02408	3.95878	3.8983	4.00188	14.3245	13.89	13.522	13.8893	13.9107	13.6095	14.3804	14.3769	15.3725	14.486	13.972	15.0951	56894	chr21	45285116	45407475	6609	+	NM_020132	protein_coding	LPAAT-GAMMA1|MGC4604	P1512	1-acylglycerol-3-phosphate O-acyltransferase 3	AGPAT3
492	AGPAT4	0.946292	0.93037	0.983175	0.130579	0.138524	0.607522	1.95957	1.87993	1.85545	1.99232	1.94643	2.04745	1.84444	1.86537	1.88095	1.85741	1.9153	1.79992	1.95705	1.89096	1.76599	2.9542	2.83031	3.13408	2.60274	2.63971	2.67481	2.63857	2.77053	2.50024	2.87003	2.72096	2.41413	56895	chr6	161551057	161695107	7879	-	NM_020133	protein_coding	1-AGPAT4|LPAAT-delta|dJ473J16.2	P17048	1-acylglycerol-3-phosphate O-acyltransferase 4	AGPAT4
493	AGPAT4-IT1	1.19071	1.09292	0.917866	0.141478	0.239071	0.384372	0.672457	0.924285	0.80064	0.451357	0.601201	0.827705	0.779031	1.08689	1.12304	0.618381	0.810325	0.807762	0.658679	0.804708	0.919585	0.362505	0.511291	0.774949	0.719433	1.12269	1.17486	0.538971	0.753197	0.756199	0.575468	0.750398	0.896128	79992	chr6	161581164	161583014	1851	-	NR_024277	lncRNA	.	.	AGPAT4 intronic transcript 1	AGPAT4-IT1
494	AGPAT5	1.07296	1.03582	0.965386	0.0196005	0.286559	0.235533	4.08826	4.18986	4.13904	4.13384	4.01363	4.11961	4.08298	4.23689	4.17492	4.14858	4.19759	4.12406	4.22719	4.13694	4.06318	16.4173	15.0231	16.3848	16.016	17.8303	17.0112	16.8273	17.3401	16.55	17.6525	16.6654	15.7961	55326	chr8	6565878	6619021	5519	+	NM_018361	protein_coding	1AGPAT5|LPAATE	P16836	1-acylglycerol-3-phosphate O-acyltransferase 5	AGPAT5
495	AGPAT6	0.994423	1.00385	1.00948	0.681294	0.926108	0.812429	4.32467	4.31661	4.33022	4.27778	4.31656	4.34279	4.36023	4.30063	4.32543	4.32053	4.31971	4.45349	4.18772	4.34877	4.31848	18.2428	18.7684	19.2934	19.6209	18.6803	18.9912	19.0846	18.96	21.0503	17.1464	19.4596	19.0472	.	chr8	41435707	41482520	6310	+	NM_178819	.	DKFZp586M1819|LPAAT-zeta|LPAATZ|TSARG7	P34825	.	AGPAT6
496	AGPAT9	0.936025	0.900957	0.962535	0.0299887	0.00315228	0.12358	4.55703	4.46165	4.40656	4.57386	4.49358	4.60915	4.54907	4.38989	4.48222	4.48924	4.48291	4.44029	4.4281	4.40626	4.34993	22.6289	21.3488	23.4082	22.5047	19.9361	21.286	21.5766	21.3504	20.853	20.437	20.2928	19.491	.	chr4	84457067	84527027	3182	+	NM_001256422	.	AGPAT8|GPAT3|LPAAT-theta|MAG1|MGC11324	P12426	.	AGPAT9
497	AGPS	0.986792	0.974183	0.987222	0.655404	0.387869	0.701731	3.95103	3.93185	3.9133	3.89972	3.93319	3.95329	4.01545	3.90597	3.85758	3.9475	4.01188	3.86108	3.95202	3.98249	3.85321	13.8087	14.1573	14.4918	15.236	13.9705	13.4546	14.5072	15.125	13.6256	14.4136	14.8709	13.5206	8540	chr2	178257471	178408564	7665	+	NM_003659	protein_coding	ADAP-S|ADAS|ADHAPS|ADPS|ALDHPSY|DKFZp762O2215|FLJ99755	P20371	alkylglycerone phosphate synthase	AGPS
498	AGR2	1.22457	1.21779	0.994464	0.0887585	0.363713	0.974634	1.03891	1.33119	1.32318	0.716753	0.822271	1.25838	1.27189	1.45963	1.19216	1.27584	1.38278	0.847004	1.87804	1.2274	1.13273	0.6353	0.759298	1.39242	1.42105	1.74803	1.28074	1.42947	1.60692	0.806266	2.66652	1.34766	1.19945	10551	chr7	16832264	16844738	983	-	NM_006408	protein_coding	AG2|GOB-4|HAG-2|PDIA17|XAG-2	P20150	anterior gradient 2, protein disulphide isomerase family member	AGR2
499	AGR3	1	1	1	1	1	1	0	0	0	0	0	0	0	0	0	0	0	0	0	0	0	0	0	0	0	0	0	0	0	0	0	0	0	155465	chr7	16899030	16921613	750	-	NM_176813	protein_coding	AG3|BCMP11|HAG3|PDIA18|hAG-3	P32982	anterior gradient 3, protein disulphide isomerase family member	AGR3
500	AGRN	0.910094	0.929638	1.02147	0.0159946	0.0383558	0.218825	5.98715	5.85124	5.88189	6.0865	5.96403	5.92149	5.97135	5.87735	5.88289	5.82373	5.81982	5.88231	5.91342	5.84249	5.88846	66.4058	60.9175	59.6166	62.0027	57.7021	57.8352	55.9449	55.4584	58.3844	59.0141	56.6263	58.5295	375790	chr1	955503	991499	7511	+	NM_198576	protein_coding	FLJ45064	P10465	agrin	AGRN
501	AGRP	0.978839	0.978838	1	0.355757	0.355752	0.917453	0.0308601	3.20234e-06	2.84283e-06	2.17047e-05	2.16381e-05	0	0.119627	3.68133e-06	7.84994e-06	0	1.27808e-06	0	1.13713e-05	0	0	0	0	0	0.0869465	0	0	0	0	0	0	0	0	181	chr16	67516474	67517716	764	-	NM_001138	protein_coding	AGRT|ART|ASIP2|MGC118963	P26530	agouti related neuropeptide	AGRP
502	AGT	1.00065	0.990679	0.990038	0.970012	0.599394	0.275483	0.0226944	0.0236281	0.00918328	3.85477e-05	0.088675	0	0	0.0300308	0.0333491	0.0308725	2.2699e-06	0	2.01955e-05	0	0.0363678	0	0.0626034	0	0	0.0209717	0.0232421	0.0218755	0	0	0	0	0.025781	183	chr1	230838272	230850336	2581	-	NM_000029	protein_coding	ANHU|FLJ92595|FLJ97926|SERPINA8	P22458	angiotensinogen	AGT
503	AGTPBP1	1.04297	1.01522	0.973391	0.110291	0.600323	0.425748	4.15034	4.21104	4.17213	4.13623	4.11298	4.17706	4.17411	4.21049	4.28853	4.172	4.16994	4.09593	4.24993	4.2116	4.12568	16.4452	16.1663	17.0911	17.1251	17.4886	18.4874	17.1193	16.9918	16.2124	17.9486	17.6034	16.5395	23287	chr9	88161454	88356944	4419	-	NM_001286717	protein_coding	DKFZp686M20191|KIAA1035|NNA1	P20602	ATP/GTP binding protein 1	AGTPBP1
504	AGTR1	1	1	1	1	1	1	0	0	0	0	0	0	0	0	0	0	0	0	0	0	0	0	0	0	0	0	0	0	0	0	0	0	0	185	chr3	148415658	148460790	2571	+	NM_031850	protein_coding	AG2S|AGTR1A|AGTR1B|AT1|AT1B|AT1R|AT2R1|AT2R1A|AT2R1B|HAT1R	P32258	angiotensin II receptor type 1	AGTR1
505	AGTR2	1	1	1	1	1	1	0	0	0	0	0	0	0	0	0	0	0	0	0	0	0	0	0	0	0	0	0	0	0	0	0	0	0	186	chrX	115301958	115306225	2899	+	NM_000686	protein_coding	AT2|ATGR2|MRX88	P1858	angiotensin II receptor type 2	AGTR2
506	AGTRAP	0.979519	0.955344	0.97532	0.658729	0.190381	0.622617	4.19339	4.16353	4.12748	4.17673	4.12373	4.24211	4.22799	4.30562	4.20198	4.05688	4.07542	4.17051	4.02623	4.18999	4.11766	16.9431	16.2953	17.9254	17.814	18.7492	17.3523	15.7308	15.8508	17.124	15.2251	17.3269	16.4422	57085	chr1	11796142	11810828	1259	+	NM_001040195	protein_coding	ATRAP|MGC29646	P26805	angiotensin II receptor associated protein	AGTRAP
507	AGXT	1	1	1	1	1	1	0	0	0	0	0	0	0	0	0	0	0	0	0	0	0	0	0	0	0	0	0	0	0	0	0	0	0	189	chr2	241808162	241818536	1598	+	NM_000030	protein_coding	AGT|AGT1|AGXT1|PH1|SPAT|SPT|TLH6	P26840	alanine-glyoxylate aminotransferase	AGXT
508	AGXT2	1	1	1	1	1	1	0	0	0	0	0	0	0	0	0	0	0	0	0	0	0	0	0	0	0	0	0	0	0	0	0	0	0	64902	chr5	34998206	35048240	2135	-	NM_001306173	protein_coding	AGT2|DAIBAT	P725	alanine--glyoxylate aminotransferase 2	AGXT2
509	AHCTF1	1.00955	1.02122	1.01156	0.754665	0.590631	0.791442	4.55315	4.56686	4.58345	4.60124	4.51716	4.5786	4.51358	4.60875	4.49931	4.51149	4.64266	4.46511	4.67661	4.64339	4.53894	23.0795	21.7151	22.8968	21.9352	23.3661	21.5508	21.9288	23.9676	21.2338	24.4684	24.0951	22.3582	25909	chr1	247002402	247094726	8631	-	NM_015446	protein_coding	DKFZp434N093|ELYS|MST108|TMBS62	P24107	AT-hook containing transcription factor 1	AHCTF1
510	AHCTF1P1	0.938564	1.01582	1.08232	0.126736	0.756355	0.0777999	0.388968	0.297495	0.411619	0.470365	0.246962	0.441196	0.387287	0.272008	0.329696	0.279384	0.308155	0.269074	0.4905	0.480281	0.395864	0.381896	0.184296	0.357773	0.309545	0.207053	0.255713	0.215383	0.237961	0.207128	0.403012	0.396901	0.31765	285116	chr2	162355578	162364413	8836	-	NR_077058	misc_RNA	AHCTF1P|ELYS-like	.	AT-hook containing transcription factor 1 pseudogene 1	AHCTF1P1
511	AHCY	0.975608	0.980587	1.0051	0.467382	0.562555	0.842253	7.16202	7.12639	7.13374	7.11456	7.17714	7.08994	7.26038	7.17	7.11039	7.16038	7.06224	7.18475	7.09135	7.08821	7.16799	136.436	142.535	135.248	152.962	142.806	136.766	142.825	132.578	145.475	134.777	135.657	143.518	191	chr20	32868071	32899608	2538	-	NM_000687	protein_coding	SAHH	P31663	adenosylhomocysteinase	AHCY
512	AHCYL1	0.984691	0.960719	0.975656	0.49126	0.269146	0.437912	5.29193	5.26967	5.23411	5.30893	5.2456	5.35608	5.25433	5.28539	5.26875	5.22569	5.29782	5.12957	5.32059	5.26482	5.21467	38.3214	36.632	39.9624	37.3274	37.9462	37.4395	36.6186	38.3184	34.2436	38.794	37.6103	36.3154	10768	chr1	110527387	110566364	4586	+	NM_006621	protein_coding	DCAL|IRBIT|PRO0233|XPVKONA	P1991	adenosylhomocysteinase like 1	AHCYL1
513	AHCYL2	0.926439	0.922404	0.995645	0.0267593	0.0660474	0.917914	1.86685	1.75662	1.75032	1.8808	1.85984	1.91268	1.81223	1.79869	1.73347	1.67441	1.81557	1.71295	1.88891	1.67853	1.71126	2.6606	2.60779	2.76537	2.5228	2.47544	2.31786	2.20492	2.51872	2.295	2.69185	2.21138	2.28661	23382	chr7	128864855	129070052	5887	+	NM_015328	protein_coding	ADOHCYASE3|FLJ21719|KIAA0828	P17742	adenosylhomocysteinase like 2	AHCYL2
514	AHDC1	1.13482	1.17123	1.03208	0.0048193	0.0010937	0.308484	2.78614	2.96861	3.01417	2.73829	2.81312	2.73992	2.85003	2.9161	3.05536	2.94496	2.95417	3.05838	3.04096	2.93451	3.01971	5.62248	5.97589	5.68099	6.23746	6.53866	7.29146	6.73737	6.74652	7.37935	7.19952	6.67407	7.14504	27245	chr1	27860756	27930005	6358	-	NM_001029882	protein_coding	CL23945|DJ159A19.3|RP1-159A19.1	P20551	AT-hook DNA binding motif containing 1	AHDC1
515	AHI1	0.960163	0.998567	1.04	0.24927	0.971767	0.405875	2.58045	2.5218	2.57838	2.55059	2.63657	2.52407	2.6078	2.43243	2.60858	2.55373	2.48629	2.49308	2.65012	2.48663	2.67334	4.81762	5.17565	4.75252	5.11743	4.39144	5.08367	4.8986	4.60101	4.66269	5.25451	4.62548	5.40537	54806	chr6	135605110	135818903	5898	-	NM_001134831	protein_coding	AHI-1|DKFZp686J1653|FLJ14023|FLJ20069|JBTS3|ORF1|dJ71N10.1	P16700	Abelson helper integration site 1	AHI1
516	AHNAK	1.33565	1.38796	1.03916	0.000183832	0.00130229	0.443391	7.50021	7.91775	7.97318	7.36168	7.59684	7.53875	7.49328	7.98517	7.86685	7.91356	7.90285	7.87487	7.85022	8.06686	8.08485	162.099	190.986	184.967	179.945	252.028	231.734	241.419	238.213	235.329	228.756	268.295	271.848	79026	chr11	62201014	62314332	19265	-	NM_024060	protein_coding	AHNAKRS|MGC5395	P7619	AHNAK nucleoprotein	AHNAK
517	AHNAK2	0.947251	0.977372	1.0318	0.178708	0.695715	0.551776	2.51767	2.43949	2.48465	2.38996	2.6014	2.50925	2.56142	2.47962	2.37296	2.44803	2.45517	2.37106	2.35832	2.57632	2.61422	4.20451	5.02769	4.69374	4.92354	4.57093	4.16678	4.48175	4.48152	4.20337	4.10867	4.98541	5.14784	113146	chr14	105403591	105444694	18317	-	NM_138420	protein_coding	C14orf78|KIAA2019	P118	AHNAK nucleoprotein 2	AHNAK2
518	AHR	0.786482	0.75098	0.954859	0.00286009	0.00261743	0.499222	5.11949	4.77298	4.70634	5.23726	5.02156	5.12953	5.08087	4.71878	4.70005	4.7311	4.92972	4.53629	4.8905	4.65229	4.72326	36.4275	31.2253	34.0095	32.9815	25.2961	24.916	25.701	29.4641	22.3633	28.5362	24.2548	25.5441	196	chr7	17338276	17385775	6247	+	NM_001621	protein_coding	bHLHe76	P11108	aryl hydrocarbon receptor	AHR
519	AHRR	0.914681	0.92161	1.00758	0.0832278	0.027794	0.845817	0.387584	0.258924	0.269812	0.39749	0.455462	0.409644	0.282154	0.198465	0.36416	0.143014	0.319069	0.280439	0.296739	0.222246	0.278728	0.314178	0.367917	0.328397	0.217268	0.147136	0.286092	0.105314	0.247369	0.216585	0.227036	0.167666	0.214592	57491	chr5	304291	438405	5660	+	NM_020731	protein_coding	AHH|AHHR|KIAA1234|MGC167813|MGC176630|bHLHe77	P7974	aryl-hydrocarbon receptor repressor	AHRR
520	AHSA1	1.02289	0.973777	0.95199	0.31942	0.547185	0.231658	6.91898	6.95162	6.88064	6.86454	6.94681	6.8777	6.98351	6.93134	6.93704	6.97789	6.95974	7.01691	6.76123	6.88048	6.8522	114.568	121.356	116.609	126.077	120.88	121.169	125.734	123.417	129.385	107.005	117.331	115.109	10598	chr14	77924373	77935815	1400	+	NM_012111	protein_coding	AHA1|C14orf3|p38	P32400	activator of Hsp90 ATPase activity 1	AHSA1
521	AHSA2	1.06118	0.931267	0.877574	0.494966	0.351425	0.230612	2.32155	2.40722	2.21881	2.44487	2.33743	2.26652	2.22784	2.35354	2.67526	2.36865	2.18751	2.02666	2.44424	2.24622	2.12402	4.40869	4.02003	3.81203	3.70081	4.10491	5.37282	4.18738	3.55333	3.0985	4.42348	3.76138	3.37739	130872	chr2	61404555	61414686	3031	+	NM_152392	protein_coding	DKFZp564C236|FLJ34679|FLJ41715|Hch1	P29448	AHA1, activator of heat shock 90kDa protein ATPase homolog 2 (yeast)	AHSA2
522	AHSG	1	1	1	1	1	1	0	0	0	0	0	0	0	0	0	0	0	0	0	0	0	0	0	0	0	0	0	0	0	0	0	0	0	197	chr3	186330850	186339107	1573	+	NM_001622	protein_coding	A2HS|AHS|FETUA|HSGA	P12768	alpha-2-HS-glycoprotein	AHSG
523	AHSP	1	1	1	1	1	1	0	0	0	0	0	0	0	0	0	0	0	0	0	0	0	0	0	0	0	0	0	0	0	0	0	0	0	51327	chr16	31539203	31540124	506	+	NM_016633	protein_coding	EDRF|ERAF	P4575	alpha hemoglobin stabilizing protein	AHSP
524	AICDA	0.990342	1.00399	1.01378	0.547871	0.870146	0.499702	0.0209487	0.00694701	0.0266885	0.0819934	3.78397e-05	0	0	0.0275739	1.37277e-05	0	2.23507e-06	0	1.98856e-05	0.103895	0	0.0577306	0	0	0	0.0192381	0	0	0	0	0	0.0751329	0	57379	chr12	8754762	8765442	2794	-	NM_020661	protein_coding	AID|ARP2|CDA2|HIGM2	P25807	activation-induced cytidine deaminase	AICDA
525	AIDA	1.06822	1.033	0.967026	0.0276013	0.117173	0.137608	5.7656	5.86081	5.81244	5.81397	5.70759	5.77434	5.76451	5.88988	5.81711	5.82048	5.9133	5.79812	5.83359	5.8367	5.78056	54.7983	50.8303	53.7386	53.5893	58.215	55.2135	55.815	59.2383	55.0173	55.7841	56.3942	54.2396	64853	chr1	222841355	222885864	3006	-	NM_022831	protein_coding	C1orf80|FLJ12806|FLJ32421|RP11-378J18.7	P13699	axin interactor, dorsalization associated	AIDA
526	AIF1	0.999983	1.06913	1.06915	0.284071	0.240099	0.239997	3.45132e-05	1.01999e-05	0.0964751	6.91316e-05	6.89195e-05	0	0	1.17255e-05	2.5003e-05	0	4.07087e-06	0	0.0742939	0.291352	0	0	0	0	0	0	0	0	0	0	0.0524665	0.224754	0	199	chr6	31582994	31584798	751	+	NM_004847_2	protein_coding	AIF-1|IBA1|IRT-1|IRT1	P11288	allograft inflammatory factor 1	AIF1
527	AIF1L	0.971675	1.02136	1.05113	0.754282	0.816646	0.160076	1.68462	1.64317	1.71512	1.48072	1.75895	1.4717	1.96694	1.60187	1.69803	1.67874	1.59101	1.73519	1.79019	1.71146	1.61831	1.77394	2.3647	1.77369	2.9208	2.03228	2.23763	2.21398	2.01154	2.34541	2.448	2.28503	2.08119	83543	chr9	133971863	133998539	3528	+	NR_033701	protein_coding	C9orf58|FLJ12783|IBA2|MGC29466	.	allograft inflammatory factor 1 like	AIF1L
528	AIFM1	0.998784	0.967541	0.968719	0.976059	0.602067	0.597448	4.60214	4.60038	4.55453	4.54327	4.72717	4.55942	4.57096	4.56934	4.54725	4.6999	4.58008	4.6781	4.32563	4.63435	4.55512	22.1295	25.2789	22.5813	22.8654	22.7093	22.3129	25.1249	22.9076	24.7671	18.9648	23.9388	22.6217	9131	chrX	129263338	129299861	2601	-	NM_145812	protein_coding	AIF|COXPD6|MGC111425|PDCD8	P33902	apoptosis inducing factor, mitochondria associated 1	AIFM1
529	AIFM2	1.01881	1.02569	1.00675	0.716852	0.64601	0.870286	4.13825	4.16514	4.17484	4.07143	4.0961	4.05949	4.31095	4.13585	4.11494	4.26663	4.13806	4.24817	4.14859	4.05522	4.23898	15.6783	15.9668	15.6752	18.9268	16.5563	16.2772	18.3461	16.5986	18.1251	16.6625	15.6936	17.9709	84883	chr10	71872023	71892690	3247	-	NM_032797	protein_coding	AMID|PRG3|RP11-367H5.2	P27990	apoptosis inducing factor, mitochondria associated 2	AIFM2
530	AIFM3	1.01826	1.00767	0.989603	0.171119	0.356259	0.479153	1.30068e-05	0.0261151	0.0110374	2.60535e-05	2.59735e-05	0	0	0.0339982	9.42278e-06	0.0693068	1.53417e-06	0	1.36497e-05	0.0436387	0	0	0	0	0	0.0237792	0	0.0496429	0	0	0	0.0309551	0	150209	chr22	21319418	21335649	2742	+	NM_144704	protein_coding	AIFL|FLJ30473|FLJ45137	P27485	apoptosis inducing factor, mitochondria associated 3	AIFM3
531	AIG1	1.03848	1.04827	1.00943	0.429288	0.36215	0.834055	3.67649	3.73096	3.7445	3.61878	3.68617	3.80831	3.5823	3.69285	3.78568	3.63308	3.80548	3.72389	3.83341	3.79515	3.61617	11.1884	11.7726	13.0106	11.0262	11.9148	12.7531	11.4708	12.9755	12.297	13.1985	12.9374	11.3202	51390	chr6	143380500	143661480	7825	+	NM_001286587	protein_coding	AIG-1|DKFZp686F03136|FLJ10485|dJ95L4.1	P23392	androgen-induced 1	AIG1
532	AIM1	1.01771	1.07771	1.05895	0.62211	0.0648824	0.237515	2.57368	2.59901	2.68165	2.57765	2.52671	2.60388	2.58536	2.60638	2.52621	2.53502	2.71999	2.58461	2.76058	2.62669	2.74679	4.92723	4.72136	5.07972	5.02346	5.08242	4.74559	4.82316	5.58599	5.03368	5.75222	5.19882	5.74003	202	chr6	106959730	107018324	7542	+	NM_001624	protein_coding	CRYBG1|ST4	P32343	absent in melanoma 1	AIM1
533	AIM1L	1.00522	1.02948	1.02414	0.817177	0.0432994	0.303228	0.0522471	0.0597531	0.0941666	0.0844207	0.0287724	0.0428753	0.0523383	0.0559576	0.136157	0	0.0435223	0.0758302	0.076526	0.123385	0.100391	0.0594105	0.0197119	0.0301719	0.0372652	0.0394378	0.0985521	0	0.0305941	0.0546223	0.0540569	0.0898574	0.0726361	55057	chr1	26648350	26680621	5245	-	NM_001039775	protein_coding	CRYBG2|DKFZp434L1713|FLJ10040|FLJ38020	P15564	absent in melanoma 1-like	AIM1L
534	AIM2	1.034	0.959399	0.927855	0.46454	0.562264	0.332396	1.44519	1.49342	1.38539	1.42435	1.35623	1.46468	1.52998	1.48687	1.35675	1.52287	1.59681	1.58067	1.3432	1.44564	1.13596	1.66913	1.546	1.76022	1.89589	1.80019	1.55593	1.88394	2.02376	2.00448	1.52975	1.73167	1.20506	9447	chr1	159032275	159046647	1484	-	NM_004833	protein_coding	PYHIN4	P12930	absent in melanoma 2	AIM2
535	AIMP1	1.00954	0.95528	0.946255	0.71902	0.134629	0.0905117	4.68164	4.69533	4.61564	4.67353	4.64712	4.65158	4.75185	4.65705	4.71546	4.75975	4.64615	4.6388	4.59095	4.6824	4.54681	24.3158	23.8566	24.1367	26.0524	24.1954	25.1964	26.2321	24.0279	24.0772	22.998	24.784	22.4874	9255	chr4	107236767	107270381	3260	+	NM_001142415	protein_coding	EMAP2|EMAPII|SCYE1|p43	P10147	aminoacyl tRNA synthetase complex-interacting multifunctional protein 1	AIMP1
536	AIMP2	0.950816	0.98394	1.03484	0.0709468	0.764801	0.511521	5.01766	4.94489	4.9943	5.09647	5.01168	5.00822	4.95048	4.94646	4.92768	4.92667	4.97817	5.16333	5.02256	4.85247	4.91961	32.9403	31.0018	31.1862	30.0481	29.7918	29.3461	29.5761	30.5045	35.0698	31.3675	28.0127	29.413	7965	chr7	6048882	6063465	1219	+	NM_006303	protein_coding	JTV-1|JTV1|P38	P30797	aminoacyl tRNA synthetase complex-interacting multifunctional protein 2	AIMP2
537	AIP	1.01548	1.01912	1.00358	0.691939	0.750854	0.951892	5.66564	5.6878	5.69296	5.62059	5.62173	5.64186	5.77275	5.79636	5.64629	5.63845	5.66428	5.81991	5.46919	5.73252	5.72702	47.7977	47.8376	48.9359	53.8993	54.4985	48.9362	49.0806	49.6885	55.8652	43.1064	52.3949	52.2252	9049	chr11	67250500	67258579	1425	+	NM_003977	protein_coding	ARA9|FKBP16|FKBP37|SMTPHN|XAP2	P4571	aryl hydrocarbon receptor interacting protein	AIP
538	AIPL1	0.980972	0.989956	1.00916	0.206871	0.574596	0.511792	0.0417957	0.0140796	0.0272319	0.0822224	0.0279499	0.0557054	0	0.0276411	2.09992e-05	0.0283812	3.41899e-06	0.0375081	3.0419e-05	0.0701961	0	0.057881	0.0192012	0.0393746	0	0.019283	0	0.020108	0	0.0267056	0	0.0502179	0	23746	chr17	6327057	6338519	3698	-	NM_001285402	protein_coding	AIPL2|LCA4	P2068	aryl hydrocarbon receptor interacting protein like 1	AIPL1
539	AIRE	1	1	1	1	1	1	0	0	0	0	0	0	0	0	0	0	0	0	0	0	0	0	0	0	0	0	0	0	0	0	0	0	0	326	chr21	45705721	45718102	2299	+	NM_000383	protein_coding	AIRE1|APECED|APS1|APSI|PGA1	P1500	autoimmune regulator	AIRE
540	AIRN	0.97452	0.963	0.988179	0.269562	0.138909	0.148655	0.077132	0.0398957	0.0227393	0.055586	0.0545597	0.162887	0.0318567	0.0341123	0.0379471	0.0349765	0.0524708	0.0462594	0.023626	0	0.0206991	0.0386667	0.0379371	0.119541	0.0225453	0.0238509	0.026479	0.0248381	0.0370046	0.0330329	0.0163266	0	0.014646	100271873	chr6	160424323	160428696	1489	-	NR_047511	lncRNA	.	.	antisense of IGF2R non-protein coding RNA	AIRN
541	AJAP1	1	1	1	1	1	1	0	0	0	0	0	0	0	0	0	0	0	0	0	0	0	0	0	0	0	0	0	0	0	0	0	0	0	55966	chr1	4715105	4843851	3317	+	NM_018836	protein_coding	MOT8|RP3-426F10.1|SHREW-1|SHREW1	P18202	adherens junctions associated protein 1	AJAP1
542	AJUBA	0.942562	0.940569	0.997886	0.00319323	0.00377059	0.843132	6.38314	6.2978	6.29475	6.35286	6.42208	6.36659	6.39007	6.30167	6.27066	6.30811	6.31041	6.26593	6.28559	6.31123	6.31567	80.0644	84.0536	81.5238	83.2204	77.7744	75.9774	78.6649	78.3253	76.476	76.6743	78.7495	79.0464	84962	chr14	23440383	23451851	4687	-	NM_198086	protein_coding	.	P20477	ajuba LIM protein	AJUBA
543	AK1	0.957187	0.973793	1.01735	0.292079	0.686669	0.771177	4.09681	4.03368	4.05849	4.00258	4.2246	4.09448	4.05616	4.08061	4.06394	4.01519	3.97249	4.1784	3.81617	4.13156	4.0814	14.9019	17.5524	16.0846	15.7019	15.897	15.6776	15.2533	14.6904	17.2212	13.0258	16.5988	16.0083	203	chr9	130628759	130640022	2266	-	NM_000476	protein_coding	.	P20264	adenylate kinase 1	AK1
544	AK2	0.994492	0.987197	0.992665	0.802668	0.504916	0.720608	5.79638	5.78841	5.77779	5.73563	5.80527	5.82169	5.82122	5.82858	5.79548	5.80578	5.7216	5.78385	5.74665	5.82143	5.75809	51.8479	54.4652	55.5649	55.7762	55.7516	54.3771	55.2387	51.7427	54.4658	52.4623	55.7893	53.3859	204	chr1	33473541	33502512	6038	-	NM_013411	protein_coding	ADK2	P15815	adenylate kinase 2	AK2
545	AK3	1.04793	1.02906	0.981995	0.35738	0.659632	0.803676	3.04167	3.10921	3.083	3.10888	2.9817	3.08069	2.9912	2.96671	3.22186	3.04958	3.18418	2.81564	3.17577	3.18218	3.12786	7.56369	6.83994	7.46096	6.98193	6.80751	8.30553	7.32017	8.08546	6.08528	8.00208	8.11123	7.77989	50808	chr9	4709557	4742043	4621	-	NM_001199855	protein_coding	AK3L1|AK6|AKL3L|AKL3L1|FIX	P6567	adenylate kinase 3	AK3
546	AK4	1.05168	1.04472	0.993376	0.0276355	0.0509506	0.757982	3.7522	3.8249	3.81531	3.78996	3.73157	3.73009	3.75636	3.86718	3.76867	3.83817	3.82381	3.79436	3.86475	3.76697	3.83323	12.7249	12.1799	12.2713	12.5677	13.5737	12.5912	13.3747	13.1541	12.9632	13.5096	12.6689	13.3194	205	chr1	65613232	65697828	7501	+	NM_203464	protein_coding	AK3|AK3L1|AK3L2|MGC166959	P32624	adenylate kinase 4	AK4
547	AK5	1.0275	0.975772	0.949659	0.573964	0.647264	0.230658	0.559442	0.598576	0.524058	0.521884	0.701015	0.573652	0.427639	0.533453	0.665217	0.548383	0.642696	0.630526	0.545889	0.498832	0.41236	0.4314	0.620292	0.488346	0.34704	0.446626	0.58393	0.46545	0.560945	0.552252	0.45753	0.415319	0.33317	26289	chr1	77747662	78025654	4520	+	NM_174858	protein_coding	AK6|MGC33326	P23970	adenylate kinase 5	AK5
548	AK6	1.03397	0.975848	0.943791	0.510621	0.654789	0.220821	5.46019	5.50838	5.42492	5.53926	5.3549	5.57238	5.36041	5.477	5.42359	5.60487	5.5219	5.39365	5.29885	5.51124	5.48628	45.1277	39.5906	46.588	40.2534	43.4777	41.7937	47.9242	44.9251	41.322	38.1953	44.8015	44.045	102157402	chr5	68647553	68651780	733	-	NM_001015891	protein_coding	.	P17550	adenylate kinase 6	AK6
549	AK7	0.995919	0.995919	1	0.355862	0.355857	0.917453	0.00589995	5.9345e-07	5.26825e-07	0.0234525	4.00992e-06	0	0	6.82215e-07	1.45473e-06	0	2.36851e-07	0	2.1073e-06	0	0	0.0161065	0	0	0	0	0	0	0	0	0	0	0	122481	chr14	96858448	96955764	3300	+	NM_152327	protein_coding	FLJ32864	P30227	adenylate kinase 7	AK7
550	AK8	0.974613	0.994433	1.02034	0.207483	0.796731	0.224533	0.0562455	0.0191475	0.0481918	0.074629	0.109877	0.0381534	0	0.0374879	3.13326e-05	0.0385648	5.10142e-06	0.0508447	0.0509372	0	0.0895848	0.052351	0.0781777	0.0268047	0	0.0262462	0	0.0274033	0	0.0363414	0.0356383	0	0.0645663	158067	chr9	135600965	135754198	2106	-	NM_152572	protein_coding	.	P25693	adenylate kinase 8	AK8
551	AK9	1.03085	0.897309	0.870454	0.740692	0.238363	0.0602184	1.48116	1.52499	1.32483	1.5825	1.14232	1.64838	1.50072	1.45016	1.37633	1.55486	1.69818	1.28144	1.21551	1.38183	1.41204	1.97859	1.19499	2.13503	1.83778	1.72982	1.59086	1.94859	2.24388	1.44201	1.3154	1.61353	1.66998	221264	chr6	109814059	110012415	7733	-	NM_001145128	protein_coding	.	P27186	adenylate kinase 9	AK9
552	AKAP1	1.01463	1.02477	1.01	0.404832	0.228736	0.654597	4.95385	4.9748	4.98915	4.97568	4.96759	4.92012	4.9514	5.00008	4.98651	4.99629	4.91466	5.04215	4.94977	4.95039	5.01209	30.2118	30.0379	29.2795	30.0677	30.9581	30.6098	31.0865	29.1476	32.1659	29.7743	30.0487	31.4248	8165	chr17	55162553	55198705	4752	+	NM_003488	protein_coding	AKAP|AKAP121|AKAP149|AKAP84|D-AKAP1|MGC1807|PRKA1|SAKAP84	P26441	A-kinase anchoring protein 1	AKAP1
553	AKAP10	0.991913	0.902004	0.909358	0.842016	0.0457532	0.0112171	3.45555	3.44384	3.30676	3.5924	3.37582	3.44815	3.39574	3.37089	3.48486	3.4429	3.47398	3.28549	3.38633	3.25664	3.29528	10.9734	9.30184	9.91537	9.56582	9.33183	10.1653	9.92852	10.1066	8.81269	9.41485	8.59632	8.86252	11216	chr17	19807765	19881169	3941	-	NM_007202	protein_coding	D-AKAP2|MGC9414|PRKA10	P12567	A-kinase anchoring protein 10	AKAP10
554	AKAP11	0.920018	0.928259	1.00896	0.0384337	0.0939749	0.840331	3.68136	3.56109	3.57396	3.7373	3.60912	3.69889	3.67713	3.54568	3.56916	3.47079	3.65288	3.43222	3.66436	3.59855	3.59075	12.2362	11.1094	11.9873	11.8413	10.6623	10.8361	10.1441	11.5728	9.86468	11.6284	11.1622	11.1039	11215	chr13	42846289	42897403	9920	+	NM_016248	protein_coding	AKAP220|DKFZp781I12161|FLJ11304|KIAA0629|PRKA11	P16803	A-kinase anchoring protein 11	AKAP11
555	AKAP12	3.4441	3.09402	0.898355	3.27028e-08	9.93479e-07	0.022991	4.39172	6.17584	6.0212	4.24696	4.39205	4.45329	4.46435	6.21979	6.10292	6.18129	6.19672	6.05247	5.88118	6.04511	6.0969	17.811	19.8049	20.909	21.1776	73.432	67.5347	71.947	72.3154	65.8069	57.6909	65.3082	67.7734	9590	chr6	151561134	151679694	8789	+	NM_005100	protein_coding	AKAP250|DKFZp686M0430|DKFZp686O0331|FLJ20945|FLJ97621	P4152	A-kinase anchoring protein 12	AKAP12
556	AKAP13	1.35596	1.49359	1.1015	7.16843e-05	6.06497e-06	0.0188195	2.82632	3.26564	3.40511	2.78165	2.84799	2.8867	2.78626	3.30627	3.33338	3.23928	3.17861	3.3557	3.3594	3.46227	3.43993	5.82133	6.14317	6.3965	5.92665	8.87978	9.05313	8.48912	8.05037	9.29804	9.22413	10.0627	9.89889	11214	chr15	85923847	86292589	13670	+	NM_006738	protein_coding	AKAP-Lbc|ARHGEF13|BRX|FLJ11952|FLJ43341|HA-3|Ht31|LBC|PROTO-LB|PROTO-LBC|c-lbc	P30647	A-kinase anchoring protein 13	AKAP13
557	AKAP14	1	1	1	1	1	1	0	0	0	0	0	0	0	0	0	0	0	0	0	0	0	0	0	0	0	0	0	0	0	0	0	0	0	158798	chrX	119029936	119054679	841	+	NM_178813	protein_coding	AKAP28	P27006	A-kinase anchoring protein 14	AKAP14
558	AKAP17A	1	1	1	1	1	1	0	0	0	0	0	0	0	0	0	0	0	0	0	0	0	0	0	0	0	0	0	0	0	0	0	0	0	8227	chrX	1710486	1721407	3274	+	NM_005088	protein_coding	721P|CCDC133|CXYorf3|DXYS155E|FLJ98315|MGC125365|MGC125366|MGC39904|SFRS17A|XE7|XE7Y	P18048	A-kinase anchoring protein 17A	AKAP17A
559	AKAP2	1.04422	1.02655	0.983074	0.0154446	0.210418	0.257358	6.63509	6.69752	6.67289	6.58288	6.67232	6.64502	6.63867	6.69201	6.69039	6.7066	6.701	6.66439	6.63988	6.65756	6.72817	94.0707	100.157	99.0911	99.0611	102.25	101.971	104.009	102.99	101.121	98.2946	100.388	105.541	11217	chr9	112810878	112934791	7098	+	NM_001004065	protein_coding	AKAPKL|FLJ53197|PALM2|PRKA2	P12304	A-kinase anchoring protein 2	AKAP2
560	AKAP3	1.00469	1.00171	0.997026	0.472903	0.804028	0.696487	0.00538583	0.0121432	0.00784651	1.76828e-05	1.76286e-05	0	0.0213889	0.0228946	0.0254734	0	1.04126e-06	0.0311241	9.26419e-06	0	0	0	0	0	0.0150757	0.0159472	0.0177011	0	0	0.0221051	0	0	0	10566	chr12	4724674	4758213	3621	-	NM_006422	protein_coding	AKAP110|CT82|FSP95|PRKA3|SOB1	P8875	A-kinase anchoring protein 3	AKAP3
561	AKAP4	1	1	1	1	1	1	0	0	0	0	0	0	0	0	0	0	0	0	0	0	0	0	0	0	0	0	0	0	0	0	0	0	0	8852	chrX	49955411	49965664	3344	-	NM_003886	protein_coding	AKAP 82|AKAP-4|AKAP82|CT99|FSC1|HI|PRKA4|hAKAP82|p82	P9210	A-kinase anchoring protein 4	AKAP4
562	AKAP5	1.01608	0.932641	0.917879	0.703123	0.0888638	0.0543687	0.826143	0.84916	0.725536	0.715559	0.902759	0.859458	0.820193	0.835057	0.754946	0.842695	0.956736	0.761606	0.707149	0.779942	0.649889	0.63575	0.862182	0.814448	0.769218	0.782726	0.685178	0.798078	0.940454	0.700852	0.629261	0.720588	0.572644	9495	chr14	64932217	64941221	6487	+	NM_004857	protein_coding	AKAP75|AKAP79|H21	P28325	A-kinase anchoring protein 5	AKAP5
563	AKAP6	0.959943	1.00176	1.04356	0.071656	0.948747	0.163605	0.319403	0.260423	0.321939	0.325219	0.368432	0.285298	0.297239	0.269182	0.211501	0.306357	0.253047	0.222846	0.336561	0.374925	0.348787	0.250189	0.288078	0.218693	0.230082	0.20472	0.157144	0.238271	0.191586	0.16879	0.261316	0.298293	0.275161	9472	chr14	32798479	33302268	10387	+	NM_004274	protein_coding	ADAP100|ADAP6|AKAP100|KIAA0311|MGC165020|PRKA6|mAKAP	P24526	A-kinase anchoring protein 6	AKAP6
564	AKAP7	0.995785	1.00707	1.01134	0.949979	0.924802	0.859519	1.23791	1.23181	1.24808	1.40965	1.09615	1.30518	1.11671	1.18855	1.10919	1.36005	1.25765	1.25084	1.08797	1.42196	1.21161	1.64336	1.12696	1.47131	1.17419	1.27727	1.15326	1.57546	1.39034	1.38977	1.12005	1.68653	1.32304	9465	chr6	131456826	131604675	3461	+	NM_016377	protein_coding	AKAP15|AKAP18	P12501	A-kinase anchoring protein 7	AKAP7
565	AKAP8	1.00661	1.00209	0.995503	0.822832	0.935122	0.878007	4.84402	4.85353	4.84702	4.79297	4.80832	4.89452	4.87763	4.80361	4.88093	4.92872	4.79662	4.85007	4.77369	4.88543	4.87626	26.4984	26.7936	28.7469	28.5182	26.8892	28.3797	29.6169	26.7792	28.0324	26.2381	28.6806	28.511	10270	chr19	15464332	15490612	3543	-	NM_005858	protein_coding	AKAP95|DKFZp586B1222	P22860	A-kinase anchoring protein 8	AKAP8
566	AKAP8L	1.032	1.01862	0.987037	0.508682	0.808084	0.846324	5.262	5.30744	5.28862	5.0945	5.26813	5.30625	5.36527	5.3229	5.30431	5.37747	5.22073	5.44733	5.02348	5.28832	5.36148	32.885	37.2244	38.5718	40.3897	38.972	38.3988	40.7897	36.2723	42.9201	31.3836	38.2442	40.3106	26993	chr19	15490859	15529932	2248	-	NM_001291478	protein_coding	DKFZp434L0650|HA95|HAP95|NAKAP|NAKAP95	P20244	A-kinase anchoring protein 8 like	AKAP8L
567	AKAP9	0.895251	0.910862	1.01744	0.0172656	0.0838628	0.646828	2.83054	2.67091	2.69585	2.76482	2.75513	2.93959	2.8548	2.69538	2.66749	2.62273	2.69679	2.58333	2.64727	2.74169	2.80133	5.74827	5.70318	6.67259	6.25996	5.46932	5.33657	5.1887	5.48083	5.02955	5.24094	5.71351	6.00043	10142	chr7	91570189	91739987	12439	+	NM_147185	protein_coding	AKAP-9|AKAP350|AKAP450|CG-NAP|HYPERION|KIAA0803|MU-RMS-40.16A|PRKA9|YOTIAO	P7977	A-kinase anchoring protein 9	AKAP9
568	AKIP1	1.00115	0.996101	0.994956	0.982865	0.955397	0.913624	4.31948	4.32114	4.31384	4.10838	4.31353	4.37032	4.4627	4.28458	4.33721	4.31978	4.34227	4.42124	4.19399	4.20567	4.41774	16.108	18.727	19.6843	21.1376	18.4626	19.1552	19.0742	19.2746	20.5632	17.2256	17.529	20.4737	56672	chr11	8932701	8941626	1788	+	NM_020642	protein_coding	.	P20128	A-kinase interacting protein 1	AKIP1
569	AKIRIN1	0.969898	0.940163	0.969342	0.449601	0.169674	0.560437	4.9376	4.8935	4.84858	4.95757	4.88542	4.9138	4.99131	4.88344	4.83547	4.8148	5.03031	4.75927	4.98264	4.76736	4.87345	29.8245	28.3199	29.147	30.9375	28.4759	27.4674	27.2948	31.6641	26.2642	30.4852	26.3504	28.4544	79647	chr1	39456916	39471737	2726	+	NM_001136275	protein_coding	C1orf108|FLJ12666|RP11-781D11.2|STRF2	P19187	akirin 1	AKIRIN1
570	AKIRIN2	1.00708	1.01503	1.00789	0.874575	0.69106	0.783748	4.92703	4.93721	4.94856	5.04437	4.8646	4.96378	4.82515	4.82277	4.98088	4.96834	4.97104	4.97695	4.97045	4.9194	4.92652	31.7367	27.898	30.2098	27.4656	27.2617	30.487	30.4705	30.3493	30.701	30.2194	29.3888	29.5581	55122	chr6	88384578	88411985	1932	-	NM_018064	protein_coding	C6orf166|FBI1|FLJ10342|dJ486L4.2	P23898	akirin 2	AKIRIN2
571	AKNA	1.04126	1.04971	1.00812	0.291926	0.37958	0.867512	1.63673	1.69506	1.70672	1.53735	1.69672	1.59335	1.71224	1.71639	1.63476	1.76472	1.66084	1.60646	1.69694	1.63968	1.86931	1.88511	2.22251	2.01773	2.2866	2.28284	2.09866	2.41118	2.1609	2.06006	2.23206	2.12567	2.66627	80709	chr9	117096433	117156685	7383	-	NM_030767	protein_coding	FLJ31001|FLJ33184|KIAA1968|RP11-82I1.4	P23520	AT-hook transcription factor	AKNA
572	AKNAD1	1.02008	0.968297	0.949239	0.465013	0.326942	0.152456	0.126497	0.155175	0.0800187	0.176754	0.152238	0.10446	0.0701656	0.0736918	0.193264	0.194377	0.156063	0	0.0712488	0.0668986	0.176372	0.128848	0.109941	0.0751056	0.05027	0.0522586	0.142777	0.14527	0.114161	0	0.0501788	0.0478921	0.130932	254268	chr1	109358520	109400864	3204	-	NM_152763	protein_coding	C1orf62|MGC26989	P3716	AKNA domain containing 1	AKNAD1
573	AKR1A1	1.02951	1.01146	0.982469	0.376861	0.67682	0.532728	4.87894	4.92089	4.89537	4.83918	4.96277	4.8789	4.83108	4.97406	4.83511	4.96371	4.90646	4.95525	4.85991	4.86687	4.89749	27.393	29.9366	28.4266	27.5823	30.3872	27.4603	30.3691	28.9769	30.2272	27.9159	28.3022	28.9491	10327	chr1	46016455	46035723	1491	+	NM_001202414	protein_coding	ALDR1|ALR|ARM|DD3|MGC12529|MGC1380	P20989	aldo-keto reductase family 1, member A1 (aldehyde reductase)	AKR1A1
574	AKR1B1	0.977051	0.964001	0.986644	0.234545	0.0491985	0.328	6.95746	6.92397	6.90457	7.01456	6.93253	6.93935	6.94185	6.89147	6.96758	6.91333	6.92241	6.9058	6.91574	6.88024	6.91619	127.237	120.15	121.743	122.461	117.558	123.783	120.19	120.239	119.724	119.217	117.311	120.374	231	chr7	134127107	134143888	1398	-	NM_001628	protein_coding	ADR|ALDR1|ALR2|AR|MGC1804	P406	aldo-keto reductase family 1, member B1 (aldose reductase)	AKR1B1
575	AKR1B10	0.972852	0.912609	0.938076	0.546967	0.0275584	0.121586	0.182212	0.142505	0.0502815	0.100954	0.193851	0.287417	0.139786	0.194202	0.213561	0	0.152693	0.0691221	0.0690085	0	0.0618373	0.0714228	0.142227	0.220479	0.102404	0.143821	0.158934	0	0.111562	0.0497767	0.0485523	0	0.0442715	57016	chr7	134212344	134226166	1596	+	NM_020299	protein_coding	AKR1B11|AKR1B12|ALDRLn|ARL-1|ARL1|HIS|HSI|MGC14103	P23150	aldo-keto reductase family 1, member B10 (aldose reductase)	AKR1B10
576	AKR1B15	1.00882	0.999998	0.991252	0.356028	0.288923	0.355915	4.38986e-06	0.012677	1.15171e-06	8.7932e-06	8.76622e-06	0	0	0.0500494	3.18024e-06	0	5.17788e-07	0	4.60683e-06	0	0	0	0	0	0	0.0352146	0	0	0	0	0	0	0	441282	chr7	134233849	134264592	1625	+	NM_001080538	protein_coding	AKR1B10L	P3296	aldo-keto reductase family 1, member B15	AKR1B15
577	AKR1C1	0.924283	1.05279	1.13904	0.0601734	0.272576	0.0160343	1.14615	1.03255	1.22037	1.24112	1.10205	1.06397	1.17107	1.07807	0.959996	1.07753	1.01123	1.26787	1.18181	1.31794	1.10466	1.3524	1.13623	1.0908	1.25737	1.10947	0.941901	1.11715	1.01506	1.41764	1.26286	1.49938	1.15675	1645	chr10	5005454	5020158	1379	+	NM_001353	protein_coding	2-ALPHA-HSD|20-ALPHA-HSD|C9|DD1|DDH|DDH1|H-37|HAKRC|MBAB|MGC8954	P26824	aldo-keto reductase family 1, member C1	AKR1C1
578	AKR1C2	0.975195	1.10432	1.13241	0.473374	0.260772	0.150359	0.171492	0.135254	0.314651	0.291474	0.0789409	0.167437	0.139727	0.164642	0.138676	0.107978	0.129148	0.555962	0.169254	0.370778	0.120576	0.221619	0.0551812	0.123082	0.102444	0.120615	0.100368	0.0785476	0.0935651	0.473014	0.123622	0.294433	0.0879759	1646	chr10	5029968	5060225	4155	-	NM_001354	protein_coding	AKR1C-pseudo|BABP|DD|DD2|DDH2|FLJ53800|HAKRD|HBAB|MCDR2	P35438	aldo-keto reductase family 1, member C2	AKR1C2
579	AKR1C3	1.00506	0.998024	0.993003	0.973728	0.982483	0.965162	1.60211	1.60938	1.59925	1.64173	1.78284	1.46619	1.49524	1.75142	1.02557	1.48345	2.00218	1.69325	1.67241	1.26434	1.7207	2.10238	2.42158	1.76311	1.82759	2.36363	1.0313	1.80698	3.00474	2.24914	2.17786	1.4097	2.30729	8644	chr10	5090958	5149878	1354	+	NM_001253908	protein_coding	DD3|DDX|HA1753|HAKRB|HAKRe|HSD17B5|KIAA0119|PGFS|hluPGFS	P36067	aldo-keto reductase family 1, member C3	AKR1C3
580	AKR1C4	1	1	1	1	1	1	0	0	0	0	0	0	0	0	0	0	0	0	0	0	0	0	0	0	0	0	0	0	0	0	0	0	0	1109	chr10	5238798	5260910	1192	+	NM_001818	protein_coding	3-alpha-HSD|C11|CDR|CHDR|DD4|HAKRA|MGC22581	P11040	aldo-keto reductase family 1, member C4	AKR1C4
581	AKR1C6P	0.99999	1.0426	1.04261	0.284072	0.356071	0.355963	2.11325e-05	6.24541e-06	0.0602021	4.23296e-05	4.21997e-05	0	0	7.17956e-06	1.53094e-05	0	2.4926e-06	0	0.22706	0	0	0	0	0	0	0	0	0	0	0	0.169643	0	0	389932	chr10	4913859	4958465	1397	-	NR_026743	misc_RNA	.	.	aldo-keto reductase family 1, member C6, pseudogene	AKR1C6P
582	AKR1C8P	1	1	1	1	1	1	0	0	0	0	0	0	0	0	0	0	0	0	0	0	0	0	0	0	0	0	0	0	0	0	0	0	0	340811	chr10	5196655	5227150	2127	-	NR_027916	misc_RNA	.	.	aldo-keto reductase family 1, member C8, pseudogene	AKR1C8P
583	AKR1D1	0.989862	0.989862	1	0.134347	0.134343	0.917453	0.0147026	1.51527e-06	1.34515e-06	1.02701e-05	1.02386e-05	0.0304584	0.0280341	1.74192e-06	3.7144e-06	0	6.04758e-07	0	5.38061e-06	0	0	0	0	0.021341	0.0197897	0	0	0	0	0	0	0	0	6718	chr7	137761178	137803050	2710	+	NM_001190906	protein_coding	3o5bred|CBAS2|SRD5B1	P11745	aldo-keto reductase family 1, member D1	AKR1D1
584	AKR1E2	0.909762	1.04801	1.15197	0.149282	0.533553	0.130553	1.03969	0.903248	1.10735	1.09148	1.0897	1.07293	0.895462	1.03188	0.946714	0.691299	0.921574	1.10033	1.30275	0.857599	1.13416	1.1212	1.11861	1.10382	0.864513	1.04311	0.924309	0.619404	0.893674	1.15211	1.4611	0.816287	1.20093	83592	chr10	4868369	4890251	1554	+	NR_073126	protein_coding	AKR1CL2|AKRDC1|LoopADR|MGC10612	.	aldo-keto reductase family 1, member E2	AKR1E2
585	AKR7A2	1.01014	1.05256	1.04199	0.73086	0.187689	0.290563	4.36108	4.37563	4.43497	4.34852	4.32901	4.32523	4.43858	4.40134	4.38498	4.42564	4.28674	4.53969	4.45075	4.38752	4.35501	19.2097	18.9383	19.0478	20.7718	20.1033	19.8334	20.6023	18.5088	22.4079	20.7777	20.0171	19.5619	8574	chr1	19629202	19638640	2619	-	NM_003689	protein_coding	AFAR|AFAR1|AFB1-AR1|AKR7	P1660	aldo-keto reductase family 7, member A2	AKR7A2
586	AKR7A2P1	1.00156	1.02784	1.02624	0.972725	0.444022	0.483404	0.0634136	0.0656559	0.103026	0.000164989	0.181202	0.0646048	0	2.79845e-05	5.96728e-05	0.188796	0.0653929	0.167217	0.0849346	0.081134	0.0768527	0	0.132407	0.0458077	0	0	0	0.140774	0.0463264	0.124004	0.0601834	0.0582907	0.0552051	246182	chr1	113465972	113467295	1324	+	NR_002796	misc_RNA	.	.	aldo-keto reductase family 7, member A2 pseudogene 1	AKR7A2P1
587	AKR7A3	1.05358	1.09993	1.044	0.559554	0.372457	0.675079	0.366307	0.441602	0.503718	0.196389	0.566257	0.429428	0.242438	0.255981	0.618697	0.324038	0.537029	0.79314	0.47672	0.322485	0.374676	0.143532	0.476432	0.346745	0.184305	0.193698	0.533852	0.253815	0.450739	0.737274	0.389579	0.252056	0.298523	22977	chr1	19609057	19615280	1241	-	NM_012067	protein_coding	AFAR2	P11343	aldo-keto reductase family 7, member A3 (aflatoxin aldehyde reductase)	AKR7A3
588	AKR7L	1.02033	1.09534	1.07351	0.693543	0.200346	0.381063	0.179948	0.20899	0.311332	0.193395	0.109754	0.205485	0.208894	0.0338925	0.334492	0.28267	0.166542	0.363829	0.51297	0.166373	0.172942	0.141632	0.0777271	0.153098	0.156777	0.0236424	0.260013	0.217948	0.122267	0.289046	0.425219	0.123105	0.12838	246181	chr1	19592476	19600568	2314	-	NR_040288	misc_RNA	AFAR3|AKR7A4	.	aldo-keto reductase family 7-like (gene/pseudogene)	AKR7L
589	AKT1	1.0002	1.01901	1.0188	0.992839	0.406639	0.306156	6.46081	6.4611	6.48798	6.4834	6.46977	6.38455	6.50274	6.4989	6.45536	6.47325	6.41564	6.5046	6.43763	6.50721	6.50131	87.7401	86.9077	82.5577	90.0621	89.3149	86.4909	88.3262	84.3275	90.4126	85.3065	90.3524	90.0382	207	chr14	105235687	105262080	2857	-	NM_005163	protein_coding	AKT|MGC99656|PKB|PKB-ALPHA|PRKBA|RAC|RAC-ALPHA	P30591	v-akt murine thymoma viral oncogene homolog 1	AKT1
590	AKT1S1	0.991181	1.00804	1.01701	0.734161	0.767633	0.509641	5.62112	5.60834	5.63267	5.69346	5.62529	5.56883	5.59385	5.59275	5.55054	5.62816	5.65961	5.69023	5.65342	5.6128	5.57149	50.3299	47.9603	46.4712	47.4983	47.1929	45.7295	48.7237	49.5248	50.9781	49.1182	48.1433	46.7873	84335	chr19	50372290	50381613	3524	-	NM_001098633	protein_coding	Lobe|MGC2865|PRAS40	P30051	AKT1 substrate 1	AKT1S1
591	AKT2	0.992917	0.985466	0.992496	0.711895	0.455541	0.450141	5.00582	4.99557	4.9847	5.05043	5.03663	4.94048	4.99321	5.02177	4.97738	4.98651	4.99622	4.9689	4.96771	5.00034	5.00148	31.8728	31.5604	29.7098	30.9811	31.4423	30.4102	30.8703	30.901	30.5261	30.1593	31.1423	31.1877	208	chr19	40736224	40791302	5393	-	NM_001626	protein_coding	PKBB|PKBBETA|PRKBB|RAC-BETA	P16119	v-akt murine thymoma viral oncogene homolog 2	AKT2
592	AKT3	0.925092	1.01291	1.09493	0.232756	0.922897	0.512025	3.87548	3.76315	3.89399	3.68501	3.9635	3.88839	3.94832	3.89384	3.68869	3.81206	3.64442	3.60158	3.79774	4.32608	3.74008	11.7594	14.4816	13.8103	14.4974	13.8455	11.8574	13.1178	11.499	11.2197	12.85	19.1337	12.4255	10000	chr1	243651535	244006886	1843	-	NM_181690	protein_coding	DKFZp434N0250|PKB-GAMMA|PKBG|PRKBG|RAC-PK-gamma|RAC-gamma|STK-2	P27180	v-akt murine thymoma viral oncogene homolog 3	AKT3
593	AKTIP	1.11309	1.09027	0.979503	0.0355289	0.0389201	0.48826	2.88732	3.04189	3.01201	2.94265	2.85183	2.77216	2.97402	2.95926	3.01427	3.12811	3.06059	3.01439	3.04658	2.96045	3.02524	6.63144	6.16516	5.83196	6.88677	6.76752	7.05819	7.78402	7.33958	7.1288	7.2311	6.81363	7.17677	64400	chr16	53524952	53537216	2666	-	NM_022476	protein_coding	FT1|FTS	P10242	AKT interacting protein	AKTIP
594	ALAD	0.962168	0.922188	0.958448	0.564599	0.101924	0.546611	3.39756	3.34192	3.2807	3.30925	3.49775	3.41334	3.36321	3.41158	3.08356	3.36033	3.4816	3.24861	3.17008	3.31118	3.38429	8.83733	10.2133	9.65514	9.32987	9.62765	7.45283	9.32053	10.1655	8.56457	7.96429	8.96513	9.4887	210	chr9	116148592	116163618	3183	-	NM_000031	protein_coding	ALADH|MGC5057|PBGS	P16791	aminolevulinate dehydratase	ALAD
595	ALAS1	0.902203	0.886763	0.982886	0.0189103	0.0303497	0.600546	5.36335	5.21487	5.18997	5.24237	5.41929	5.34989	5.43399	5.19955	5.23903	5.23054	5.18979	5.25418	5.08194	5.14872	5.26696	36.547	41.4521	39.787	42.4074	35.696	36.6556	36.7451	35.4815	37.4198	32.7241	34.6263	37.6919	211	chr3	52232099	52248343	2672	+	NM_001304443	protein_coding	ALAS|ALAS3|ALASH|MIG4	P5421	5'-aminolevulinate synthase 1	ALAS1
596	ALAS2	1.00136	0.985385	0.984044	0.942366	0.133812	0.35595	0.0212453	0.0232087	4.03526e-06	0.0419737	3.07142e-05	0.0423611	0	5.22548e-06	0.0906689	0	1.81418e-06	0	1.6141e-05	0	0	0.0290616	0	0.0298037	0	0	0.0645749	0	0	0	0	0	0	212	chrX	55035488	55057497	2134	-	NM_001037967	protein_coding	ALAS-E|ALASE|ANH1|ASB|FLJ93603|XLDPP|XLSA	P1969	5'-aminolevulinate synthase 2	ALAS2
597	ALB	0.971564	0.953045	0.98094	0.353868	0.118788	0.161924	0.0693923	0.0277729	8.96997e-06	0.0696236	6.82738e-05	0.169516	0.0327036	1.16157e-05	0.0387397	0.071106	4.03273e-06	0	3.58795e-05	0	0	0.0487519	0	0.124697	0.023138	0	0.0270489	0.0509824	0	0	0	0	0	213	chr4	74269972	74287129	2247	+	NM_000477	protein_coding	DKFZp779N1935|PRO0883|PRO0903|PRO1341	P32308	albumin	ALB
598	ALCAM	1.07476	1.11433	1.03681	0.0181397	0.00836431	0.286297	6.80199	6.90601	6.95817	6.79799	6.76973	6.84863	6.79045	6.93991	6.85437	6.86455	6.96219	6.86793	6.99779	7.02762	6.93411	109.357	107.218	114.263	110.163	121.607	114.365	116.161	123.629	116.596	126.255	130.033	121.889	214	chr3	105085557	105295757	4910	+	NM_001243283	protein_coding	CD166|FLJ38514|MEMD|MGC71733	P12844	activated leukocyte cell adhesion molecule	ALCAM
599	ALDH16A1	0.959691	0.99966	1.04165	0.441453	0.996008	0.580034	4.51671	4.45736	4.51622	4.44405	4.56323	4.43357	4.6175	4.54773	4.51856	4.46117	4.2882	4.68061	4.30797	4.44195	4.60559	20.5924	22.4551	20.6113	23.646	22.3571	21.8546	21.1423	18.5285	24.8098	18.7228	20.826	23.4606	126133	chr19	49956473	49974305	3106	+	NM_001145396	protein_coding	MGC10204	P4753	aldehyde dehydrogenase 16 family member A1	ALDH16A1
600	ALDH18A1	0.97601	0.998363	1.0229	0.197138	0.867086	0.258751	5.65036	5.61532	5.64799	5.64109	5.66895	5.64895	5.64226	5.62939	5.55167	5.66507	5.61284	5.63756	5.62014	5.65967	5.67401	48.498	49.4652	49.1821	49.1529	48.4327	45.7658	50.0118	47.913	49.1165	47.9744	49.7658	50.3053	5832	chr10	97365686	97416567	3616	-	NM_001017423	protein_coding	GSAS|MGC117316|P5CS|PYCS	P14004	aldehyde dehydrogenase 18 family member A1	ALDH18A1
601	ALDH1A1	1	1	1	1	1	1	0	0	0	0	0	0	0	0	0	0	0	0	0	0	0	0	0	0	0	0	0	0	0	0	0	0	0	216	chr9	75515578	75568233	2369	-	NM_000689	protein_coding	ALDC|ALDH-E1|ALDH1|ALDH11|MGC2318|PUMB1|RALDH1	P13344	aldehyde dehydrogenase 1 family member A1	ALDH1A1
602	ALDH1A2	0.999999	1.00571	1.00571	0.284073	0.356071	0.355963	2.82214e-06	8.34042e-07	0.00821005	5.65295e-06	5.6356e-06	0	0	9.58794e-07	2.0445e-06	0	3.32874e-07	0	0.0325635	0	0	0	0	0	0	0	0	0	0	0	0.0226371	0	0	8854	chr15	58245622	58358121	3700	-	NM_170696	protein_coding	MGC26444|RALDH(II)|RALDH2|RALDH2-T	P6344	aldehyde dehydrogenase 1 family member A2	ALDH1A2
603	ALDH1A3	0.998836	1.01781	1.019	0.985884	0.730812	0.767601	1.63655	1.63487	1.66202	1.63921	1.49123	1.65471	1.74933	1.6159	1.42073	1.774	1.70493	1.68803	1.52875	1.66365	1.75816	2.09665	1.79454	2.14884	2.372	2.06197	1.67137	2.43299	2.25902	2.23768	1.87636	2.17787	2.39442	220	chr15	101419897	101456830	3607	+	NM_000693	protein_coding	ALDH1A6|ALDH6|RALDH3	P8155	aldehyde dehydrogenase 1 family member A3	ALDH1A3
604	ALDH1B1	0.949183	0.967684	1.01949	0.233532	0.451175	0.551332	4.64837	4.57313	4.60098	4.56573	4.7188	4.56024	4.73909	4.60291	4.5403	4.63637	4.50946	4.61717	4.50012	4.63011	4.65177	22.4923	25.1261	22.5946	25.8135	23.2675	22.2006	24.0008	21.7654	23.7032	21.5334	23.866	24.2575	219	chr9	38392661	38398662	3070	+	NM_000692	protein_coding	ALDH5|ALDHX|MGC2230	P6807	aldehyde dehydrogenase 1 family member B1	ALDH1B1
605	ALDH1L1	0.953184	0.997377	1.04636	0.360581	0.971442	0.577967	0.451371	0.382197	0.447582	0.457587	0.344036	0.457406	0.539769	0.539028	0.349342	0.355008	0.271826	0.339883	0.350627	0.70355	0.362595	0.369562	0.266217	0.373117	0.455833	0.452299	0.272848	0.281067	0.207175	0.268189	0.273473	0.631064	0.287655	10840	chr3	125822404	125900029	3714	-	NM_001270365	protein_coding	10-fTHF|DKFZp781N0997|FTHFD	P31709	aldehyde dehydrogenase 1 family member L1	ALDH1L1
606	ALDH1L1-AS1	1	1	1	1	1	1	0	0	0	0	0	0	0	0	0	0	0	0	0	0	0	0	0	0	0	0	0	0	0	0	0	0	0	100874204	chr3	125822483	125826912	437	+	NR_046602	lncRNA	.	.	ALDH1L1 antisense RNA 1	ALDH1L1-AS1
607	ALDH1L1-AS2	0.989188	0.98402	0.994776	0.398694	0.227044	0.621582	0.0335499	0.0178666	0.0103099	0.0340891	4.28963e-05	0.0677308	0.0315411	0.0336653	0.037359	0	2.53375e-06	0	2.2543e-05	0	0.040783	0.0235057	0	0.0480752	0.0222993	0.0235413	0.0260772	0	0	0	0	0	0.0289478	100862662	chr3	125898908	125929011	2323	+	NR_046383	lncRNA	.	.	ALDH1L1 antisense RNA 2	ALDH1L1-AS2
608	ALDH1L2	0.986104	0.965703	0.979312	0.619502	0.157468	0.341408	0.140034	0.119846	0.0896862	0.115512	0.220827	0.0969057	0.12365	0.0953292	0.194659	0.0787766	0.107811	0.0784539	0.0794389	0.0741982	0.126029	0.0822261	0.163697	0.0694901	0.0900926	0.0681381	0.143883	0.0567125	0.077528	0.0566245	0.0561342	0.0532284	0.0920048	160428	chr12	105413562	105478341	7491	-	NR_027752	protein_coding	DKFZp686A16126|DKFZp686M064|DKFZp686P14145|FLJ36769|FLJ38508|MGC119536|MGC119537|mtFDH	.	aldehyde dehydrogenase 1 family member L2	ALDH1L2
609	ALDH2	0.986442	0.993808	1.00747	0.72748	0.882713	0.807674	4.332	4.31231	4.32304	4.26094	4.44194	4.24332	4.37256	4.31943	4.29785	4.37534	4.25397	4.40603	4.26788	4.26817	4.34541	18.0192	20.566	17.9413	19.7977	18.9386	18.6124	19.8616	18.0708	20.3375	18.1841	18.3487	19.4246	217	chr12	112204691	112247789	2060	+	NM_001204889	protein_coding	ALDH-E2|ALDHI|ALDM|MGC1806	P35587	aldehyde dehydrogenase 2 family (mitochondrial)	ALDH2
610	ALDH3A1	1.03751	1.00577	0.969403	0.628641	0.959161	0.7842	0.499053	0.55218	0.507348	0.635371	0.290768	0.541621	0.506813	0.364288	0.509004	0.731513	0.579667	0.650134	0.0619478	0.496958	0.732327	0.548453	0.220251	0.455663	0.423067	0.286658	0.421536	0.663914	0.494233	0.573401	0.0430658	0.413412	0.664549	218	chr17	19641298	19651746	1948	-	NM_000691	protein_coding	ALDH3|ALDHIII|MGC10406	P12592	aldehyde dehydrogenase 3 family member A1	ALDH3A1
611	ALDH3A2	0.991934	0.986219	0.994239	0.846013	0.794001	0.882683	3.72235	3.71067	3.70233	3.57693	3.69227	3.79392	3.81409	3.68491	3.77102	3.70053	3.68442	3.64633	3.58861	3.80887	3.75506	10.8394	11.8269	12.8716	13.1202	11.8439	12.614	12.0669	11.8506	11.6019	10.9808	13.0704	12.5638	224	chr17	19552064	19580904	3823	+	NM_001031806	protein_coding	ALDH10|DKFZp686E23276|FALDH|FLJ20851|SLS	P34034	aldehyde dehydrogenase 3 family member A2	ALDH3A2
612	ALDH3B1	0.944264	1.02804	1.08872	0.135141	0.619991	0.11643	2.95772	2.87498	2.99761	2.87987	2.90163	2.97021	3.07137	2.89564	2.83469	2.85851	2.90985	3.12208	2.81765	3.02314	3.011	6.30645	6.41788	6.8372	7.43644	6.43242	6.11464	6.28807	6.51214	7.75726	6.0225	7.15998	7.09622	221	chr11	67776017	67796749	3099	+	NM_001161473	protein_coding	ALDH4|ALDH7|FLJ26433|FLJ34710	P17360	aldehyde dehydrogenase 3 family member B1	ALDH3B1
613	ALDH3B2	0.994914	0.994914	1	0.355756	0.355751	0.917453	0.00735696	7.59511e-07	6.74243e-07	5.14779e-06	5.13199e-06	0	0.0291953	8.73115e-07	1.8618e-06	0	3.03128e-07	0	2.69697e-06	0	0	0	0	0	0.020614	0	0	0	0	0	0	0	0	222	chr11	67429633	67448685	2689	-	NM_000695	protein_coding	ALDH8	P33330	aldehyde dehydrogenase 3 family member B2	ALDH3B2
614	ALDH4A1	0.955324	0.964735	1.00985	0.322018	0.547944	0.877225	2.34807	2.28213	2.29627	2.41395	2.26652	2.29707	2.40876	2.31702	2.13131	2.31962	2.3504	2.37251	2.15713	2.17974	2.45367	4.29391	3.77894	3.91501	4.32826	3.97731	3.3701	4.01417	4.09763	4.20698	3.44404	3.54709	4.4998	8659	chr1	19197924	19229293	2568	-	NM_170726	protein_coding	ALDH4|DKFZp779M035|P5CD|P5CDh	P8572	aldehyde dehydrogenase 4 family member A1	ALDH4A1
615	ALDH5A1	0.965467	1.00381	1.03972	0.346786	0.875919	0.188784	1.48396	1.43326	1.48945	1.47842	1.52524	1.53669	1.391	1.35959	1.38932	1.45002	1.52831	1.49503	1.46365	1.50113	1.49769	1.77096	1.86248	1.90148	1.63011	1.56367	1.61424	1.74213	1.88353	1.83158	1.75001	1.83884	1.8333	7915	chr6	24495197	24537435	5170	+	NM_170740	protein_coding	SSADH|SSDH	P499	aldehyde dehydrogenase 5 family member A1	ALDH5A1
616	ALDH6A1	1.03054	1.05308	1.02187	0.544589	0.277053	0.654566	2.35613	2.39954	2.43075	2.35714	2.32634	2.4727	2.26009	2.31904	2.50693	2.30477	2.45692	2.47631	2.51914	2.32153	2.39814	4.0882	3.98063	4.55128	3.80741	3.9841	4.67027	3.9635	4.48822	4.59574	4.71223	4.01676	4.29292	4329	chr14	74524368	74551196	4807	-	NM_001278593	protein_coding	MGC40271|MMSADHA|MMSDH	P33289	aldehyde dehydrogenase 6 family member A1	ALDH6A1
617	ALDH7A1	1.02878	1.03351	1.00459	0.236487	0.355377	0.903248	4.10972	4.15066	4.15727	4.09176	4.09555	4.09753	4.15316	4.12717	4.10781	4.22801	4.13663	4.27354	4.08908	4.08866	4.16974	15.9158	15.9608	16.1208	16.8635	16.451	16.1922	17.8353	16.5812	18.4635	15.9484	16.0845	17.0824	501	chr5	125877533	125931082	4936	-	NM_001201377	protein_coding	ATQ1|EPD|FLJ11738|FLJ92814|PDE	P13494	aldehyde dehydrogenase 7 family member A1	ALDH7A1
618	ALDH8A1	1.0199	0.962579	0.943794	0.4692	0.160174	0.0310016	0.139734	0.168168	0.0847116	0.0965488	0.0960512	0.216235	0.146725	0.213513	0.10563	0.190744	0.16053	0.0870603	0.128911	0.0822755	0.0392013	0.0681714	0.0678091	0.16172	0.107742	0.159219	0.0755661	0.142394	0.117614	0.0630117	0.092817	0.0591818	0.0279213	64577	chr6	135238528	135271260	2558	-	NM_022568	protein_coding	ALDH12|DJ352A20.2|DKFZp779D2315|MGC138650	P22745	aldehyde dehydrogenase 8 family member A1	ALDH8A1
619	ALDH9A1	0.98631	0.95006	0.963247	0.36382	0.0181795	0.0616016	5.5494	5.52952	5.47549	5.52727	5.57785	5.52362	5.56807	5.56305	5.51641	5.49558	5.54212	5.43591	5.50056	5.51225	5.45183	44.7437	46.3788	45.0067	46.6378	46.2115	44.6377	44.358	45.5732	42.5805	44.0791	44.8346	42.9837	223	chr1	165631449	165667900	2500	-	NM_000696	protein_coding	ALDH4|ALDH7|ALDH9|E3|TMABADH	P1365	aldehyde dehydrogenase 9 family member A1	ALDH9A1
620	ALDOA	0.980138	1.00035	1.02062	0.346126	0.988882	0.357815	9.26869	9.23975	9.2692	9.27466	9.26006	9.21138	9.32635	9.25151	9.19471	9.24654	9.26526	9.32637	9.25434	9.20731	9.28613	613.244	607.072	591.855	643.684	607.655	583.225	609.723	614.046	645.354	607.058	592.679	626.423	226	chr16	30064411	30081741	3314	+	NM_000034	protein_coding	ALDA|GSD12|MGC10942|MGC17716|MGC17767	P20687	aldolase, fructose-bisphosphate A	ALDOA
621	ALDOB	1.00163	1.02774	1.02607	0.921279	0.242372	0.278953	0.0238258	0.0261752	0.063301	0.0641937	7.93838e-05	0	0.0300563	1.35059e-05	0.0703723	0	0.0331423	0.0860906	0.0437768	0.120506	0	0.0448385	0	0	0.0212552	0	0.0497324	0	0.0232134	0.0621562	0.0305412	0.0876474	0	229	chr9	104182842	104198062	2426	-	NM_000035	protein_coding	ALDB|ALDO2	P1310	aldolase, fructose-bisphosphate B	ALDOB
622	ALDOC	0.947635	1.03089	1.08786	0.461259	0.598428	0.280425	1.64227	1.56468	1.68617	1.57344	1.53543	1.68964	1.75944	1.76088	1.34159	1.57385	1.55194	1.53634	1.82122	1.65557	1.71685	1.9586	1.88166	2.22599	2.39564	2.38574	1.52877	1.98851	1.93109	1.91473	2.52322	2.16008	2.29861	230	chr17	26900133	26903951	1651	-	NM_005165	protein_coding	ALDC	P26484	aldolase, fructose-bisphosphate C	ALDOC
623	ALG1	0.966386	1.0595	1.09635	0.515161	0.329532	0.0273417	3.2274	3.17808	3.31078	3.22066	3.38525	3.04957	3.23463	3.2122	3.13194	3.18742	3.17957	3.19867	3.36055	3.29282	3.38399	8.25212	9.37253	7.28044	8.44895	8.25577	7.74192	8.1551	8.05634	8.2382	9.23179	8.83824	9.4854	56052	chr16	5121810	5137380	3934	+	NM_019109	protein_coding	CDG1K|HMAT1|HMT-1|HMT1	P18536	ALG1, chitobiosyldiphosphodolichol beta-mannosyltransferase	ALG1
624	ALG10	0.901059	0.941068	1.0444	0.121755	0.444796	0.52386	1.5776	1.4273	1.48998	1.76103	1.56173	1.43497	1.53292	1.53296	1.43621	1.39174	1.34135	1.49935	1.69681	1.32233	1.41451	2.37094	1.93567	1.70395	1.902	1.89104	1.70055	1.63373	1.53303	1.84024	2.2325	1.50815	1.67475	84920	chr12	34175216	34181236	3127	+	NM_032834	protein_coding	DIE2|FLJ14751|KCR1	P20591	ALG10, alpha-1,2-glucosyltransferase	ALG10
625	ALG10B	0.915737	0.905405	0.988718	0.0417427	0.0117122	0.701198	1.24455	1.11755	1.10119	1.31802	1.16699	1.27921	1.20918	1.10068	1.08928	1.05748	1.21761	1.0804	1.13855	1.05692	1.12733	1.4811	1.23447	1.42721	1.31785	1.14278	1.12391	1.088	1.32494	1.12316	1.19594	1.08581	1.19096	144245	chr12	38710557	38723528	15888	+	NM_001013620	protein_coding	ALG10|KCR1	P29844	ALG10B, alpha-1,2-glucosyltransferase	ALG10B
626	ALG11	0.91182	0.820513	0.899863	0.28186	0.0632714	0.138501	2.62618	2.493	2.34078	2.46971	2.74187	2.81974	2.4347	2.59873	2.35304	2.4668	2.54182	2.24801	2.17803	2.41678	2.49765	4.50073	5.64504	6.06093	4.42594	5.05053	4.09583	4.55351	4.82085	3.77866	3.50796	4.3594	4.67117	440138	chr13	52586523	52603780	2565	+	NM_001004127	protein_coding	GT8|KIAA0266|UTP14C	P24695	ALG11, alpha-1,2-mannosyltransferase	ALG11
627	ALG12	0.943887	0.986562	1.04521	0.197808	0.819754	0.436903	3.2886	3.20529	3.26909	3.26528	3.41371	3.26894	3.19778	3.24753	3.22979	3.23628	3.10283	3.15965	3.3776	3.13383	3.38601	8.54301	9.57927	8.64032	8.21103	8.48527	8.35576	8.47024	7.58713	7.99231	9.35339	7.81275	9.5003	79087	chr22	50296854	50312106	2373	-	NM_024105	protein_coding	CDG1G|ECM39|MGC111358|MGC3136|PP14673|hALG12	P13536	ALG12, alpha-1,6-mannosyltransferase	ALG12
628	ALG13	0.966189	0.94324	0.976248	0.287456	0.260817	0.627189	3.26571	3.21609	3.18141	3.27172	3.32878	3.17898	3.27933	3.16198	3.26626	3.26498	3.16761	3.24448	3.24143	3.23977	2.98304	8.58634	8.97405	8.0575	8.74585	7.93906	8.5956	8.65987	7.98155	8.53556	8.42035	8.48325	6.94355	79868	chrX	110924346	111003875	7135	+	NM_001099922	protein_coding	CXorf45|FLJ23018|FLJ31785|GLT28D1|MDS031|MGC12423|YGL047W	P15241	ALG13, UDP-N-acetylglucosaminyltransferase subunit	ALG13
629	ALG14	1.09268	1.07865	0.98716	0.237465	0.445343	0.85661	2.94273	3.0706	3.05195	3.17315	2.86507	2.72682	2.9688	2.98225	3.05253	3.12257	3.12047	3.25137	2.8412	2.93597	3.14271	7.95549	6.23074	5.62062	6.85861	6.89221	7.27464	7.75081	7.69297	8.57827	6.13759	6.68259	7.87008	199857	chr1	95448279	95538507	1094	-	NM_001305242	protein_coding	MGC19780	P33189	ALG14, UDP-N-acetylglucosaminyltransferase subunit	ALG14
630	ALG1L	1.02313	1.09256	1.06786	0.635156	0.0477371	0.213264	0.0585341	0.0915227	0.186242	0.000244069	0.00024332	0.118709	0.110401	4.13982e-05	8.82753e-05	0.233058	0.119772	0.298286	0.151422	0.148084	0.141094	0	0	0.085777	0.0800892	0	0	0.176482	0.086495	0.23139	0.109963	0.108785	0.103509	200810	chr3	125648118	125655887	921	-	NM_001015050	protein_coding	ALG1L1	P17161	ALG1, chitobiosyldiphosphodolichol beta-mannosyltransferase-like	ALG1L
631	ALG1L2	0.946332	0.983815	1.03961	0.240907	0.84496	0.670661	0.175262	0.0956801	0.151721	0.177467	0.176797	0.094281	0.248384	5.20172e-05	0.000110918	0.186077	0.184594	0.446466	0.000160673	0	0.112055	0.129361	0.128844	0.0675465	0.188848	0	0	0.138706	0.136404	0.365007	0	0	0.0814629	644974	chr3	129800674	129817233	969	+	NM_001136152	protein_coding	.	P33863	ALG1, chitobiosyldiphosphodolichol beta-mannosyltransferase-like 2	ALG1L2
632	ALG1L9P	0.962631	1.05766	1.09872	0.638309	0.570414	0.335913	0.3775	0.322555	0.458373	0.260249	0.586481	0.404387	0.230894	0.433622	0.111729	0.296995	0.424864	0.260832	0.701223	0.527089	0.299706	0.195146	0.497403	0.323568	0.174779	0.350036	0.0799274	0.230385	0.342246	0.200268	0.623396	0.443056	0.232549	285407	chr11	71505409	71524905	3870	-	NR_073386	misc_RNA	.	.	asparagine-linked glycosylation 1-like 9, pseudogene	ALG1L9P
633	ALG2	0.9777	0.945723	0.967293	0.564774	0.190354	0.160126	4.47556	4.44302	4.39504	4.6055	4.48129	4.40969	4.39607	4.43802	4.41999	4.41124	4.5011	4.35526	4.35822	4.43347	4.43124	23.1546	21.1599	20.2565	20.1408	20.6467	20.345	20.3887	21.6342	19.6029	19.4232	20.6974	20.6774	85365	chr9	101978707	101984246	2989	-	NM_033087	protein_coding	CDGIi|FLJ14511|NET38|hALPG2	P24795	ALG2, alpha-1,3/1,6-mannosyltransferase	ALG2
634	ALG3	0.987442	1.0114	1.02427	0.759092	0.845484	0.587124	5.4518	5.43357	5.46816	5.57587	5.38057	5.33628	5.50189	5.43235	5.41129	5.4232	5.46684	5.35345	5.62234	5.41921	5.46383	46.3149	40.3202	39.404	44.5017	42.122	41.4304	42.1384	43.2055	40.1594	48.0529	41.9723	43.3496	10195	chr3	183960117	183967313	2023	-	NR_024533	protein_coding	CDGS4|D16Ertd36e|NOT56L|Not56	.	ALG3, alpha-1,3- mannosyltransferase	ALG3
635	ALG5	0.943788	0.905063	0.958968	0.0640528	0.00301749	0.0729877	4.86293	4.77947	4.71902	4.91004	4.90562	4.82873	4.80434	4.742	4.81139	4.83173	4.73012	4.73307	4.68876	4.73737	4.71638	28.8276	28.737	27.4208	27.0561	25.7232	26.9971	27.6265	25.5278	25.7717	24.6807	25.7866	25.4165	29880	chr13	37523908	37573504	1192	-	NM_013338	protein_coding	RP11-421P11.2|bA421P11.2	P34045	ALG5, dolichyl-phosphate beta-glucosyltransferase	ALG5
636	ALG6	1.00864	1.01971	1.01097	0.839155	0.67725	0.713686	2.95528	2.9677	2.98344	3.06736	2.80269	2.94865	2.98976	2.92215	3.0243	2.9712	2.95123	2.8829	3.00163	3.0486	2.99554	7.32202	5.92494	6.72096	6.97308	6.57023	7.11451	6.87962	6.73071	6.42155	6.97847	7.30533	7.01022	29929	chr1	63833261	63904233	3371	+	NM_013339	protein_coding	.	P7488	ALG6, alpha-1,3-glucosyltransferase	ALG6
637	ALG8	1.02655	1.01453	0.98829	0.530146	0.667357	0.682434	5.65138	5.68919	5.6722	5.77683	5.61245	5.60949	5.59909	5.70211	5.70517	5.58436	5.75952	5.66423	5.71623	5.64965	5.65773	53.3844	47.5246	47.8281	47.6754	50.9883	51.0172	47.2385	53.1478	50.0517	51.3486	49.4151	49.7305	79053	chr11	77811988	77850699	1743	-	NM_024079	protein_coding	CDG1H|MGC2840	P21107	ALG8, alpha-1,3-glucosyltransferase	ALG8
638	ALG9	0.997602	1.05584	1.05837	0.940712	0.411008	0.436406	3.19435	3.19088	3.27274	3.21677	3.19281	3.17482	3.19269	3.09697	3.22068	3.14278	3.29515	3.14021	3.50445	3.23925	3.17806	8.22746	8.07543	8.03145	8.17829	7.5451	8.29703	7.87625	8.81185	7.87167	10.3062	8.47981	8.09183	79796	chr11	111652919	111742305	6644	-	NM_024740	protein_coding	CDG1L|DIBD1|DKFZp586M2420|FLJ21845|LOH11CR1J	P4320	ALG9, alpha-1,2-mannosyltransferase	ALG9
639	ALK	0.970513	0.972927	1.00249	0.0425832	0.224002	0.888876	0.094792	0.0516109	0.0551955	0.126604	0.115072	0.0820343	0.0543429	0.0466794	0.0519288	0.0596381	0.0481624	0.0476402	0.0163669	0.0301409	0.124203	0.0906133	0.0819929	0.0585201	0.0387134	0.0327862	0.0364251	0.0426504	0.0339122	0.0340582	0.0112457	0.0213439	0.0905619	238	chr2	29415640	30144477	6265	-	NM_004304	protein_coding	CD246|NBLST3|TFG/ALK	P25637	anaplastic lymphoma receptor tyrosine kinase	ALK
640	ALKBH1	0.96175	0.878676	0.913622	0.355748	0.0354564	0.160444	2.8798	2.82353	2.6932	2.88212	2.80045	2.93883	2.89436	2.87413	2.81785	2.91008	2.68177	2.53741	2.61544	2.8011	2.80046	6.31998	5.91653	6.66857	6.4621	6.32276	6.03279	6.55151	5.41365	4.84163	5.10416	5.99596	5.99679	8846	chr14	78138749	78174356	2585	-	NM_006020	protein_coding	ABH|ABH1|ALKBH|alkB|hABH	P18609	alkB homolog 1, histone H2A dioxygenase	ALKBH1
641	ALKBH2	1.08645	0.993347	0.914308	0.203316	0.931609	0.261299	4.43189	4.55151	4.42226	4.23909	4.49932	4.46634	4.50651	4.65209	4.60397	4.55588	4.3797	4.55028	4.1543	4.40312	4.54646	17.7295	21.4381	21.1079	21.8219	24.1099	23.2494	22.6428	19.8073	22.5821	16.7289	20.2464	22.4785	121642	chr12	109525993	109531293	1186	-	NM_001205180	protein_coding	ABH2|FLJ99103|MGC90512	P8894	alkB homolog 2, alpha-ketoglutarate-dependent dioxygenase	ALKBH2
642	ALKBH3	1.00544	0.957335	0.952156	0.928726	0.432191	0.260065	4.15515	4.16297	4.09224	3.96178	4.12534	4.24999	4.26341	4.21655	4.06785	4.26887	4.08869	4.1694	4.07138	4.08063	4.04449	14.4562	16.3153	18.0291	18.281	17.5666	15.7223	18.3757	16.0065	17.1096	15.7416	15.9897	15.58	221120	chr11	43902357	43941825	1569	+	NM_139178	protein_coding	ABH3|DEPC-1|DEPC1|FLJ43614|MGC118790|MGC118792|MGC118793|PCA1	P18624	alkB homolog 3, alpha-ketoglutarate-dependent dioxygenase	ALKBH3
643	ALKBH3-AS1	1.01647	1.02139	1.00483	0.414388	0.398682	0.843563	0.0504462	0.0740202	0.0809746	0.0418404	0.0818046	0	0.0766598	0.0815162	0.0458514	0.124515	0.0426733	0.0560355	0.161703	0.0529859	0.0500596	0.0288824	0.0575099	0	0.0549828	0.0579882	0.0320836	0.0908623	0.0299882	0.0401444	0.117923	0.0377397	0.0356737	100507300	chr11	43930839	43942494	1927	-	NR_038907	lncRNA	.	.	ALKBH3 antisense RNA 1	ALKBH3-AS1
644	ALKBH4	1.00918	1.00692	0.997757	0.803031	0.896623	0.967442	2.39521	2.40839	2.40515	2.46061	2.40667	2.30315	2.40594	2.46236	2.37666	2.4776	2.31066	2.38539	2.22019	2.46528	2.5313	4.4671	4.26626	3.93578	4.31841	4.50481	4.18039	4.59449	3.95906	4.25451	3.64225	4.54193	4.80421	54784	chr7	102096667	102105321	2121	-	NM_017621	protein_coding	ABH4|FLJ20013	P26589	alkB homolog 4, lysine demethylase	ALKBH4
645	ALKBH5	1.0105	1.01634	1.00577	0.709363	0.473279	0.811589	5.25749	5.27257	5.28087	5.28369	5.19851	5.23213	5.31293	5.3278	5.21239	5.23267	5.31395	5.23899	5.32142	5.2782	5.28369	37.6387	35.4221	36.59	38.9154	39.1083	35.9662	36.8011	38.7606	37.0181	38.817	37.9699	38.143	54890	chr17	18086867	18113267	3433	+	NM_017758	protein_coding	ABH5|FLJ20308|OFOXD|OFOXD1	P10003	alkB homolog 5, RNA demethylase	ALKBH5
646	ALKBH6	0.898734	0.975129	1.085	0.224665	0.727652	0.0830407	4.10406	3.95002	4.06772	4.03224	4.28361	4.21543	3.84524	4.01904	3.97083	4.01671	3.78055	4.05262	4.11797	4.0791	4.01938	15.2333	18.3287	17.5786	13.4318	15.1909	14.6348	15.2701	12.7357	15.7014	16.2928	15.9706	15.293	84964	chr19	36500018	36505141	1885	-	NM_001297701	protein_coding	ABH6|MGC15677	P30186	alkB homolog 6	ALKBH6
647	ALKBH7	1.01993	1.08399	1.06281	0.437543	0.0630604	0.150022	4.31735	4.34582	4.4337	4.3003	4.2977	4.29055	4.37902	4.39326	4.3122	4.38826	4.28654	4.52946	4.34235	4.36924	4.48534	18.545	18.5102	18.5717	19.8916	19.9855	18.8082	20.0498	18.5062	22.2421	19.2005	19.7523	21.5037	84266	chr19	6372444	6375261	1331	+	NM_032306	protein_coding	ABH7|MGC10974|SPATA11|UNQ6002	P22120	alkB homolog 7	ALKBH7
648	ALKBH8	0.936336	0.934948	0.998518	0.025717	0.00169543	0.951102	3.04826	2.95336	2.95122	3.02098	3.03555	3.06121	3.07471	2.96384	2.89712	2.9155	3.03313	2.94497	2.96662	2.91594	2.97661	7.05801	7.14013	7.34747	7.45633	6.7922	6.42931	6.58172	7.1823	6.7475	6.78688	6.57645	6.90608	91801	chr11	107373453	107436461	4173	-	NM_001301010	protein_coding	ABH8|FLJ38204|MGC10235	P4452	alkB homolog 8, tRNA methyltransferase	ALKBH8
649	ALLC	0.980224	0.980224	1	0.355861	0.355856	0.917453	0.0288194	2.93848e-06	2.60859e-06	1.99163e-05	0.111958	0	0	3.37801e-06	7.20314e-06	0	1.17278e-06	0	1.04343e-05	0	0	0	0.079779	0	0	0	0	0	0	0	0	0	0	55821	chr2	3705786	3750260	1444	+	NM_018436	protein_coding	ALC	P29146	allantoicase	ALLC
650	ALMS1	1.00374	0.989059	0.985372	0.89035	0.747127	0.694772	2.46562	2.47101	2.44975	2.48122	2.47971	2.4993	2.40025	2.4536	2.44904	2.42044	2.5572	2.33963	2.5433	2.46781	2.44093	4.54522	4.53952	4.65459	4.29785	4.47136	4.44681	4.37787	4.88327	4.09122	4.80837	4.552	4.45257	7840	chr2	73612886	73837046	12922	+	NM_015120	protein_coding	ALSS|DKFZp686A118|DKFZp686D1828|KIAA0328	P5549	ALMS1, centrosome and basal body associated protein	ALMS1
651	ALMS1-IT1	1.34979	1.34552	0.996839	0.000125919	0.0308178	0.972382	0.648903	1.08164	1.07707	0.718881	0.568639	0.75609	0.539992	1.08781	1.12127	1.07143	1.04498	1.10309	0.688825	1.32132	1.12428	0.638922	0.477094	0.688999	0.456973	1.12392	1.17191	1.10759	1.06281	1.15594	0.608406	1.50467	1.18569	100874291	chr2	73684230	73686604	1761	+	NR_046762	lncRNA	.	.	ALMS1 intronic transcript 1	ALMS1-IT1
652	ALMS1P	0.967803	0.977993	1.01053	0.41788	0.581901	0.78541	0.0998141	0.0525993	0.0677101	0.195025	0.000155916	0.102584	0.0949043	0.0512556	5.65647e-05	0.153566	9.20964e-06	0.13603	8.19382e-05	0.128655	0	0.143255	0	0.0737074	0.0684692	0.0360599	0	0.11315	0	0.099843	0	0.0938643	0	.	chr2	73872046	73912694	1592	+	NR_003683	.	ALMS1L	.	.	ALMS1P
653	ALOX12	0.946894	1.01782	1.07491	0.157941	0.821327	0.382959	0.180538	0.101813	0.206027	0.218683	0.246226	0.16118	0.0911973	0.0331768	0.10753	0.193943	0.0675763	0	0.464172	0.201415	0.117269	0.161871	0.184167	0.11822	0.0657995	0.0231564	0.0769578	0.144983	0.0479015	0	0.377982	0.150718	0.0854199	239	chr17	6899384	6914055	2358	+	NM_000697	protein_coding	12-LOX|12S-LOX|LOG12	P25345	arachidonate 12-lipoxygenase	ALOX12
654	ALOX12-AS1	0.9508	1.0087	1.0609	0.795498	0.954693	0.686639	1.02021	0.94742	1.03271	0.63797	1.21693	0.666571	1.4032	0.937964	0.906238	1.3611	0.438183	1.17358	1.12919	1.02526	0.769812	0.54946	1.31405	0.587383	1.65095	0.91436	0.871111	1.5764	0.354578	1.26411	1.18217	1.04013	0.709567	100506713	chr17	6888442	6915653	651	-	NR_040089	lncRNA	.	.	ALOX12 antisense RNA 1	ALOX12-AS1
655	ALOX12B	0.995175	1.00926	1.01416	0.848308	0.684426	0.392201	0.0467474	0.0397698	0.0600487	0.000102945	0.120841	0.0625282	0	0.0911742	0.0345062	0.0318919	6.06204e-06	0.042112	0.0833844	0.0398189	0.0743662	0	0.0863317	0.0443027	0	0.0650907	0.0240425	0.0226348	0	0.0300446	0.0590758	0.0282442	0.053349	242	chr17	7975954	7991021	2502	-	NM_001139	protein_coding	12R-LOX	P25874	arachidonate 12-lipoxygenase, 12R type	ALOX12B
656	ALOX12P2	1.0066	0.989748	0.983258	0.768392	0.50666	0.42459	0.0270765	0.0365682	0.0122095	5.28724e-05	0.0357296	0.0713086	0	8.96774e-06	1.91225e-05	0.0364914	0.107083	0	0.04823	0	0	0	0.024651	0.050678	0	0	0	0.0259004	0.0769944	0	0.0337204	0	0	245	chr17	6756895	6803668	2995	+	NR_002710	misc_RNA	ALOX12E|MGC43625	.	arachidonate 12-lipoxygenase pseudogene 2	ALOX12P2
657	ALOX15	1	1	1	1	1	1	0	0	0	0	0	0	0	0	0	0	0	0	0	0	0	0	0	0	0	0	0	0	0	0	0	0	0	246	chr17	4534214	4544960	2684	-	NM_001140	protein_coding	15-LOX-1|15LOX-1	P21465	arachidonate 15-lipoxygenase	ALOX15
658	ALOX15B	1.03918	1.09207	1.05089	0.027697	0.0112043	0.105787	0.0080296	0.0634778	0.135095	0.0317088	0.000148141	0	0	0.0915272	0.0346516	0.0943264	0.0321763	0.201092	0.0425588	0.154141	0.138022	0.0217611	0	0	0	0.0653447	0.0241331	0.0681699	0.022526	0.150813	0.0296493	0.11342	0.101102	247	chr17	7942358	7952451	2702	+	NM_001141	protein_coding	15-LOX-2	P15656	arachidonate 15-lipoxygenase, type B	ALOX15B
659	ALOX15P1	1	1	1	1	1	1	0	0	0	0	0	0	0	0	0	0	0	0	0	0	0	0	0	0	0	0	0	0	0	0	0	0	0	100652883	chr17	6561038	6564701	672	+	NR_045985	misc_RNA	ALOX15P	.	arachidonate 15-lipoxygenase pseudogene 1	ALOX15P1
660	ALOX5	0.995063	1.02193	1.027	0.807577	0.368442	0.210302	0.0325874	0.0254464	0.0638801	8.57236e-05	8.54606e-05	0.097431	0.0305397	0.06452	0.0362401	0	5.04792e-06	0.044265	0.129187	0.0418483	0.0381922	0	0	0.0698779	0.0216018	0.0456233	0.0252735	0	0	0.0315856	0.0931145	0.029693	0.0271089	240	chr10	45869624	45941567	2644	+	NM_000698	protein_coding	5-LO|5-LOX|5LPG|LOG5|MGC163204	P5885	arachidonate 5-lipoxygenase	ALOX5
661	ALOX5AP	0.956949	0.931709	0.973624	0.713268	0.486079	0.724962	0.587375	0.523889	0.485326	0.43936	0.580757	0.914578	0.34867	0.365712	0.776559	0.537822	0.376256	0.480224	0.564264	0.456764	0.436753	0.352101	0.491003	0.885099	0.275133	0.287922	0.71099	0.454686	0.297759	0.398357	0.476242	0.374547	0.355891	241	chr13	31287615	31338565	1395	+	NM_001204406	protein_coding	FLAP	P36002	arachidonate 5-lipoxygenase activating protein	ALOX5AP
662	ALOXE3	1.08316	1.06734	0.985394	0.127718	0.185418	0.755297	0.156979	0.272229	0.251002	0.159424	0.0477157	0.264564	0.148034	0.157473	0.329023	0.226522	0.366457	0.18287	0.370948	0.252759	0.189421	0.115229	0.0327704	0.201301	0.10885	0.11506	0.255258	0.171315	0.289025	0.13658	0.291788	0.192591	0.141377	59344	chr17	7999218	8022234	3454	-	NM_021628	protein_coding	E-LOX|MGC119694|MGC119695|MGC119696|eLOX3	P22583	arachidonate lipoxygenase 3	ALOXE3
663	ALPI	1	1	1	1	1	1	0	0	0	0	0	0	0	0	0	0	0	0	0	0	0	0	0	0	0	0	0	0	0	0	0	0	0	248	chr2	233320822	233325455	3274	+	NM_001631	protein_coding	IAP	P1781	alkaline phosphatase, intestinal	ALPI
664	ALPK1	0.94408	0.939744	0.995407	0.07594	0.184064	0.917386	0.535449	0.452431	0.445789	0.564384	0.529115	0.584055	0.461232	0.381238	0.471784	0.438441	0.514958	0.438091	0.309681	0.445686	0.577276	0.474376	0.438856	0.499114	0.378689	0.301876	0.385409	0.357595	0.428709	0.357888	0.237836	0.363932	0.494699	80216	chr4	113218499	113363764	5581	+	NM_025144	protein_coding	8430410J10Rik|FLJ22670|KIAA1527|LAK	P19489	alpha kinase 1	ALPK1
665	ALPK2	0.998928	0.995603	0.996672	0.935367	0.776715	0.837413	0.0831498	0.0816017	0.0767918	0.0507741	0.089421	0.109029	0.0827674	0.0978137	0.0661716	0.0510122	0.11062	0.0407156	0.0682506	0.125042	0.0718618	0.035187	0.0630415	0.078515	0.0594883	0.0699878	0.0466642	0.03641	0.0796308	0.0290818	0.048045	0.091126	0.0515453	115701	chr18	56148482	56296189	7300	-	NM_052947	protein_coding	FLJ34875|FLJ43253|HAK	P31829	alpha kinase 2	ALPK2
666	ALPK3	1.00344	1.02151	1.01801	0.673029	0.0375172	0.12307	0.0228959	0.027847	0.0535927	0.0204746	0.0136638	0.020297	0.0370447	0.00670594	0.0296195	0.054032	0.0206181	0.0626574	0.027582	0.0757466	0.0479412	0.0139894	0.00928257	0.0141721	0.0262411	0.00463285	0.0206023	0.0385462	0.014376	0.0449203	0.0191082	0.0542907	0.0341119	57538	chr15	85359911	85416713	10917	+	NM_020778	protein_coding	FLJ12881|FLJ21176|KIAA1330|MAK|MIDORI	P16118	alpha kinase 3	ALPK3
667	ALPL	1.00594	1.03153	1.02544	0.539659	0.0844203	0.15299	0.00870108	0.0172425	0.0534879	5.6064e-05	5.5892e-05	0.0343845	0	0.0337875	2.02768e-05	0.0347522	3.30136e-06	0.0458588	2.93725e-05	0.08557	0.080874	0	0	0.0241251	0	0.0236262	0	0.0246568	0	0.032717	0	0.0615174	0.0581125	249	chr1	21835858	21904905	2596	+	NM_000478	protein_coding	AP-TNAP|APTNAP|FLJ40094|FLJ93059|HOPS|MGC161443|MGC167935|TNAP|TNSALP	P23651	alkaline phosphatase, liver/bone/kidney	ALPL
668	ALPP	1.21922	1.40366	1.15128	0.0222581	0.00457044	0.0796749	0.718571	1.00452	1.20777	0.743214	0.801542	0.470692	0.831527	1.1426	0.880771	0.964496	1.01763	1.20956	1.00838	1.20597	1.38292	0.666595	0.735309	0.385845	0.783598	1.2061	0.838394	0.957126	1.02406	1.32124	1.00692	1.31235	1.61495	250	chr2	233243244	233247599	2971	+	NM_001632	protein_coding	ALP|FLJ61142|PALP|PLAP	P14545	alkaline phosphatase, placental	ALPP
669	ALPPL2	1.01107	1.02235	1.01116	0.134233	0.168623	0.497961	1.66855e-05	0.0158939	0.0319049	3.3422e-05	3.33195e-05	0	0	0.0311642	1.20878e-05	0.0320512	1.96807e-06	0.0423188	0.0836246	0	0	0	0	0	0	0.0217731	0	0.0227147	0	0.0301502	0.0592808	0	0	251	chr2	233271552	233275424	2494	+	NM_031313	protein_coding	ALPG|ALPPL|GCAP	P23411	alkaline phosphatase, placental like 2	ALPPL2
670	ALS2	0.930643	0.981384	1.05452	0.0537993	0.421794	0.0768178	2.97982	2.87612	2.95271	2.9985	3.04839	2.93309	2.93612	2.86663	2.96391	2.80234	2.86695	2.94337	2.99279	2.92539	2.94842	6.93394	7.2138	6.63815	6.68211	6.28443	6.78185	6.01001	6.29202	6.73831	6.92994	6.62586	6.75284	57679	chr2	202564986	202645895	9279	-	NM_020919	protein_coding	ALS2CR6|ALSJ|FLJ31851|IAHSP|KIAA1563|MGC87187|PLSJ	P3798	ALS2, alsin Rho guanine nucleotide exchange factor	ALS2
671	ALS2CL	0.873545	0.902172	1.03277	0.00752003	0.0440008	0.481826	2.50798	2.31293	2.35945	2.48978	2.55367	2.5641	2.41976	2.38652	2.20915	2.31219	2.33809	2.38659	2.47136	2.23334	2.33626	4.57908	4.83224	4.91435	4.36953	4.22286	3.61219	3.98906	4.05425	4.25881	4.526	3.71952	4.07094	259173	chr3	46710485	46735194	5431	-	NM_182775	protein_coding	DKFZp686P238|MGC129698|RN49018	P5828	ALS2 C-terminal like	ALS2CL
672	ALS2CR11	1.02984	1.0231	0.993455	0.592346	0.459742	0.885881	0.174249	0.216664	0.20719	0.114917	0.102955	0.277811	0.194427	0.143362	0.0997921	0.376766	0.231002	0.230394	0.200992	0.18399	0.212986	0.0816258	0.0727647	0.212382	0.145165	0.104228	0.0711882	0.30017	0.173535	0.174755	0.148552	0.136906	0.160196	151254	chr2	202352144	202483905	7707	-	NM_001168221	protein_coding	DKFZp686H0636|FLJ25351|FLJ40332	P24815	amyotrophic lateral sclerosis 2 chromosome region candidate 11	ALS2CR11
673	ALS2CR12	0.992439	0.968909	0.976291	0.712738	0.133846	0.0240146	0.0455736	0.0346241	7.34809e-06	0.0891388	5.59292e-05	0.0903115	0	0.04503	2.02903e-05	0.0464321	0.0464673	0	2.93921e-05	0	0	0.0629257	0	0.0646104	0	0.0316193	0	0.0330453	0.0327027	0	0	0	0	130540	chr2	202152994	202222121	2405	-	NM_139163	protein_coding	.	P1004	amyotrophic lateral sclerosis 2 chromosome region candidate 12	ALS2CR12
674	ALX1	1.01154	0.999997	0.988585	0.356028	0.288923	0.355915	5.74445e-06	0.0165645	1.50709e-06	1.15065e-05	1.14712e-05	0	0	0.0651421	4.16156e-06	0	6.77563e-07	0	6.02837e-06	0	0	0	0	0	0	0.0460835	0	0	0	0	0	0	0	8092	chr12	85674036	85695561	1293	+	NM_006982	protein_coding	CART1|FND3	P29688	ALX homeobox 1	ALX1
675	ALX3	0.999551	1.08419	1.08468	0.995923	0.321705	0.314993	0.901976	0.901329	1.01859	0.670504	1.04083	1.03208	0.832265	0.930386	0.647892	0.925929	1.06941	0.898605	0.929993	1.18532	1.04272	0.584979	1.04844	1.04509	0.784401	0.904378	0.564519	0.905336	1.09803	0.870925	0.900924	1.27935	1.06552	257	chr1	110602997	110613322	1478	-	NM_006492	protein_coding	MGC138212|MGC141988	P8777	ALX homeobox 3	ALX3
676	ALX4	0.996481	1.00274	1.00628	0.884325	0.922671	0.779815	0.0503799	0.0452947	0.0543276	0.0411984	0.131624	0	0.02525	0.0797019	0.0449748	0	0.0553497	0.0548286	0.125915	0.0174106	0.0163875	0.0284595	0.0944257	0	0.0178467	0.0566659	0.03147	0	0.0390745	0.0392421	0.0906381	0.0122963	0.0115958	60529	chr11	44282278	44331716	5466	-	NM_021926	protein_coding	FND2|KIAA1788	P29516	ALX homeobox 4	ALX4
677	ALYREF	1.09024	1.0781	0.988862	0.0425245	0.251416	0.857196	7.68701	7.81166	7.7955	7.62831	7.64984	7.7071	7.75916	7.88664	7.78017	7.85576	7.71808	7.91222	7.55105	7.81833	7.87361	195.218	198.174	207.984	216.556	235.324	218.161	231.899	209.456	241.524	185.724	225.683	234.689	10189	chr17	79845711	79849462	1097	-	NM_005782	protein_coding	.	P12231	Aly/REF export factor	ALYREF
678	AMACR	1.12437	1.04031	0.925239	0.151515	0.672678	0.291924	1.84689	2.016	1.9039	1.85634	1.79637	1.62099	2.07683	2.01402	1.875	2.07524	2.08992	2.01624	1.7124	1.78486	2.07066	2.59784	2.45123	2.07612	3.23206	3.0348	2.65958	3.23119	3.25571	3.06598	2.26589	2.45742	3.21631	23600	chr5	33987091	34008220	2603	-	NM_001167595	protein_coding	CBAS4|RACE|RM	P32115	alpha-methylacyl-CoA racemase	AMACR
679	AMBN	1	1	1	1	1	1	0	0	0	0	0	0	0	0	0	0	0	0	0	0	0	0	0	0	0	0	0	0	0	0	0	0	0	258	chr4	71457975	71473004	2002	+	NM_016519	protein_coding	.	P27192	ameloblastin	AMBN
680	AMBP	1	1	1	1	1	1	0	0	0	0	0	0	0	0	0	0	0	0	0	0	0	0	0	0	0	0	0	0	0	0	0	0	0	259	chr9	116822408	116840752	1433	-	NM_001633	protein_coding	A1M|EDC1|HCP|HI30|IATIL|ITI|ITIL|ITILC|UTI	P35145	alpha-1-microglobulin/bikunin precursor	AMBP
681	AMBRA1	0.979546	0.998507	1.01936	0.559714	0.961127	0.526552	3.09643	3.06661	3.09427	3.17074	3.08747	3.00329	3.11911	3.13363	3.0936	3.05972	2.97479	3.12866	3.14194	3.05037	3.05367	7.93942	7.43734	7.01905	7.72125	7.76549	7.51338	7.37886	6.8579	7.79919	7.79321	7.31649	7.34035	55626	chr11	46417962	46615619	5546	-	NM_001300731	protein_coding	DCAF3|FLJ20294|KIAA1736|MGC33725|WDR94	P19750	autophagy and beclin 1 regulator 1	AMBRA1
682	AMD1	1.07263	1.01501	0.94628	0.0331403	0.611587	0.0532857	6.06349	6.16464	6.08498	6.10569	6.02347	6.12341	5.99744	6.12975	6.1954	6.12633	6.20525	6.05996	6.14363	6.10766	6.02587	67.3012	63.5167	68.723	63.1559	68.9254	72.0667	69.2323	72.7492	66.1672	69.3971	68.2533	64.4796	262	chr6	111135824	111216915	3618	+	NM_001287215	protein_coding	ADOMETDC|AMD|DKFZp313L1234|FLJ26964|SAMDC	P4387	adenosylmethionine decarboxylase 1	AMD1
683	AMDHD1	1.08513	1.04959	0.967257	0.245179	0.633237	0.655478	0.603724	0.721586	0.673557	0.831565	0.626785	0.39678	0.524301	0.673717	0.75595	0.740181	0.715162	0.474858	0.938128	0.649704	0.590082	0.773121	0.538778	0.316618	0.44069	0.594223	0.686545	0.67432	0.641323	0.393507	0.912321	0.571712	0.508431	144193	chr12	96337071	96362370	2136	+	NM_152435	protein_coding	MGC35366	P22538	amidohydrolase domain containing 1	AMDHD1
684	AMDHD2	1.05108	1.07539	1.02313	0.428514	0.329495	0.77595	2.71105	2.78292	2.8159	2.6803	2.61889	2.83253	2.70397	2.68199	2.97607	2.75073	2.70339	2.97809	2.79642	2.56803	2.88943	5.36314	5.09759	6.12387	5.54017	5.40947	6.84868	5.76246	5.5105	6.9244	5.92111	4.95308	6.44111	51005	chr16	2570363	2580955	2077	+	NM_001145815	protein_coding	.	P2735	amidohydrolase domain containing 2	AMDHD2
685	AMELX	1	1	1	1	1	1	0	0	0	0	0	0	0	0	0	0	0	0	0	0	0	0	0	0	0	0	0	0	0	0	0	0	0	265	chrX	11311533	11318881	835	+	NM_001142	protein_coding	AIH1|ALGN|AMG|AMGL|AMGX	P30519	amelogenin, X-linked	AMELX
686	AMELY	1	1	1	1	1	1	0	0	0	0	0	0	0	0	0	0	0	0	0	0	0	0	0	0	0	0	0	0	0	0	0	0	0	266	chrY	6733959	6742068	802	-	NM_001143	protein_coding	AMGL|AMGY	P20891	amelogenin, Y-linked	AMELY
687	AMER1	1.0656	1.07768	1.01134	0.146582	0.0347233	0.735446	1.73604	1.82771	1.84397	1.67084	1.82277	1.68628	1.75914	1.92144	1.86936	1.76014	1.75269	1.80522	1.89807	1.83281	1.8382	2.16415	2.51606	2.21851	2.39564	2.78413	2.64567	2.40104	2.36864	2.51246	2.71533	2.57364	2.58873	139285	chrX	63404997	63425624	8443	-	NM_152424	protein_coding	.	P2304	APC membrane recruitment protein 1	AMER1
688	AMER2	0.997505	0.997505	1	0.134656	0.134652	0.917452	0.00360429	3.66381e-07	3.25249e-07	0.00754766	2.47563e-06	0	0.00684899	4.21183e-07	8.98116e-07	0	1.46226e-07	0	1.301e-06	0	0	0.00513039	0	0	0.00481305	0	0	0	0	0	0	0	0	219287	chr13	25735817	25746305	9939	-	NM_199138	protein_coding	.	P19600	APC membrane recruitment protein 2	AMER2
689	AMER3	0.99406	0.994737	1.00068	0.29111	0.371386	0.854344	0.0117008	0.00310547	0.00408743	1.31905e-05	1.31501e-05	0.0242827	0.0223055	2.23725e-06	4.77063e-06	0	0.012375	0.0162739	6.91065e-06	0	0	0	0	0.0169777	0.0157235	0	0	0	0.00860411	0.0115247	0	0	0	205147	chr2	131513077	131525707	12576	+	NM_152698	protein_coding	.	P27086	APC membrane recruitment protein 3	AMER3
690	AMFR	1.06874	1.10637	1.03521	0.000208777	0.00405147	0.171089	4.63392	4.72983	4.77975	4.62031	4.63631	4.62723	4.65164	4.75587	4.72124	4.71022	4.73159	4.77431	4.74911	4.72853	4.86335	23.3963	23.6694	23.7161	24.239	25.9818	25.3011	25.3147	25.555	26.5454	25.7797	25.6219	28.2459	267	chr16	56395364	56459450	3600	-	NM_001144	protein_coding	GP78|RNF45	P9112	autocrine motility factor receptor	AMFR
691	AMH	1.09574	1.06561	0.972502	0.321611	0.463775	0.7548	3.15574	3.28764	3.24741	3.36775	3.13263	3.10751	2.98836	3.14235	3.50963	3.32301	3.14306	3.40844	3.35973	3.07983	3.11233	9.24721	7.70376	7.6198	6.96741	7.81819	10.36	9.05599	7.83002	9.68161	9.22608	7.48912	7.68747	268	chr19	2249113	2252072	2018	+	NM_000479	protein_coding	MIF|MIS	P23410	anti-Mullerian hormone	AMH
692	AMHR2	0.973611	0.989984	1.01682	0.50656	0.83925	0.682074	0.0646911	0.0261079	0.0501675	0.196795	9.86446e-05	0.0527308	0	0.101672	3.5787e-05	0	5.82668e-06	0	5.18403e-05	0.190937	0	0.144706	0	0.0372339	0	0.0728599	0	0	0	0	0	0.142242	0	269	chr12	53817639	53825318	1996	+	NM_020547	protein_coding	AMHR|MISR2|MISRII	P23433	anti-Mullerian hormone receptor type 2	AMHR2
693	AMICA1	1	1	1	1	1	1	0	0	0	0	0	0	0	0	0	0	0	0	0	0	0	0	0	0	0	0	0	0	0	0	0	0	0	.	chr11	118064442	118095809	2981	-	NM_153206	.	AMICA|CREA7-1|CREA7-4|FLJ37080|Gm638|JAML|MGC118814|MGC118815	P26401	.	AMICA1
694	AMIGO1	0.938429	0.894612	0.953308	0.299511	0.212305	0.595866	1.54463	1.45295	1.38396	1.43679	1.51267	1.67831	1.54007	1.49992	1.55149	1.4868	1.25613	1.49295	1.59195	1.31128	1.08985	1.69213	1.83768	2.20074	1.91627	1.82561	1.92537	1.81285	1.38774	1.82747	2.00592	1.4889	1.13578	57463	chr1	110049446	110052336	2471	-	NM_020703	protein_coding	AMIGO|AMIGO-1	P27802	adhesion molecule with Ig-like domain 1	AMIGO1
695	AMIGO2	0.536806	0.464717	0.865707	2.70445e-06	4.87986e-07	0.00657914	5.93933	5.0418	4.83375	6.02583	5.93382	5.91891	5.87451	4.97029	5.03951	4.99251	5.15753	4.84442	4.89667	4.78501	4.80638	63.6536	59.6573	59.5081	57.9023	30.3032	31.7893	31.0095	34.6747	27.9298	28.6564	26.6927	27.1244	347902	chr12	47469490	47473734	6417	-	NM_181847	protein_coding	ALI1|DEGA	P5722	adhesion molecule with Ig-like domain 2	AMIGO2
696	AMIGO3	0.981624	1.01461	1.0336	0.738467	0.757081	0.511055	2.7056	2.67884	2.72652	2.73687	2.82599	2.58382	2.66464	2.73128	2.79994	2.629	2.5418	2.78472	2.65582	2.65935	2.79986	5.61899	6.0417	4.9958	5.36399	5.63243	5.94645	5.21537	4.82064	5.93096	5.2783	5.34122	5.99304	386724	chr3	49754267	49757238	2972	-	NM_198722	protein_coding	AMIGO-3|MGC120552	P8795	adhesion molecule with Ig-like domain 3	AMIGO3
697	AMMECR1	1.07828	1.06684	0.989388	0.09472	0.155594	0.58444	2.91717	3.0259	3.01051	2.94963	2.80131	2.85724	3.04823	3.02551	3.06252	2.98822	3.0264	2.96205	3.03768	3.05569	2.98461	6.66849	5.9181	6.24698	7.30269	7.13263	7.33242	6.97321	7.14423	6.83964	7.18042	7.34632	6.95	9949	chrX	109437414	109683461	5604	-	NM_001025580	protein_coding	AMMERC1	P4169	Alport syndrome, mental retardation, midface hypoplasia and elliptocytosis chromosomal region gene 1	AMMECR1
698	AMMECR1L	0.975957	0.938497	0.961617	0.532844	0.0577395	0.293245	3.63557	3.60046	3.54399	3.66914	3.62949	3.69232	3.54712	3.54099	3.65217	3.51122	3.68976	3.58896	3.54639	3.55735	3.48115	11.6247	11.2821	11.9283	10.7355	10.6245	11.5377	10.4603	11.8984	11.1094	10.6361	10.8199	10.2192	83607	chr2	128619207	128643514	4776	-	NM_001199140	protein_coding	FLJ38552|MGC4268	P10705	AMMECR1 like	AMMECR1L
699	AMN	1.01583	1.18959	1.17105	0.887793	0.0603834	0.225207	0.309633	0.332294	0.560094	0.375263	0.199795	0.381297	0.274346	0.0527103	0.691491	0.343652	0.156949	0.543689	0.767056	0.309522	0.58369	0.293878	0.146304	0.302553	0.21081	0.037002	0.613229	0.27096	0.11481	0.461024	0.699105	0.240788	0.50122	81693	chr14	103388993	103397179	1557	+	NM_030943	protein_coding	PRO1028	P16079	amnion associated transmembrane protein	AMN
700	AMN1	1.16722	1.04499	0.895282	0.0172822	0.701815	0.310204	1.11372	1.3368	1.17721	1.2558	1.0715	0.992449	1.12233	1.41647	1.3784	1.2231	1.32194	1.44782	1.30141	1.12968	0.735378	1.37601	1.09106	0.989686	1.18259	1.66706	1.59511	1.34219	1.49929	1.7391	1.45823	1.19386	0.669765	196394	chr12	31824071	31882108	2590	-	NM_001278411	protein_coding	.	P21584	antagonist of mitotic exit network 1 homolog	AMN1
701	AMOT	0.990572	1.0038	1.01336	0.670665	0.874342	0.268472	0.0721127	0.0584465	0.0775862	0.157586	0.0343705	0.0343306	0.0585374	0.0558524	0.0741807	0.0459841	0.0576264	0.060803	0.071724	0.0574875	0.119468	0.114135	0.0236283	0.0240877	0.0417544	0.039362	0.0524791	0.0327679	0.0407127	0.0436154	0.0505696	0.0409999	0.0869763	154796	chrX	112018105	112084043	7386	-	NM_133265	protein_coding	KIAA1071	P12656	angiomotin	AMOT
702	AMOTL1	0.96128	0.959145	0.997779	0.11201	0.263002	0.95381	4.16755	4.11058	4.10737	4.17523	4.20679	4.12461	4.16237	4.18572	4.08413	4.08166	4.0881	3.96373	4.12859	4.1723	4.15549	16.9252	17.3227	16.4452	16.9777	17.1741	15.9122	16.0199	15.9996	14.7063	16.4195	17.1033	16.9046	154810	chr11	94501508	94609918	8999	+	NM_001301007	protein_coding	JEAP	P28832	angiomotin like 1	AMOTL1
703	AMOTL2	0.79314	0.816267	1.02916	0.000359065	9.04465e-05	0.404605	6.28185	5.9475	5.98896	6.32923	6.26359	6.22213	6.31005	6.02487	5.84056	5.91156	6.00541	5.95731	5.97163	5.98144	6.04395	78.7572	75.2093	73.661	78.6724	64.022	56.1318	59.5217	63.2091	61.5562	61.4827	62.4535	65.3049	51421	chr3	134074187	134094259	5229	-	NM_016201	protein_coding	LCCP	P22112	angiomotin like 2	AMOTL2
704	AMPD1	1	1	1	1	1	1	0	0	0	0	0	0	0	0	0	0	0	0	0	0	0	0	0	0	0	0	0	0	0	0	0	0	0	270	chr1	115215720	115238239	2406	-	NM_001172626	protein_coding	MAD|MADA	P32775	adenosine monophosphate deaminase 1	AMPD1
705	AMPD2	0.884406	0.938343	1.06099	0.0113623	0.150417	0.12617	4.57484	4.39762	4.48303	4.65163	4.56776	4.46418	4.60917	4.35104	4.36229	4.40429	4.46985	4.45099	4.5922	4.41707	4.46569	23.939	22.5292	21.0747	23.504	19.3796	19.5073	20.2869	21.149	21.0157	23.0213	20.453	21.2015	271	chr1	110162435	110174677	5263	+	NM_001257360	protein_coding	.	P27896	adenosine monophosphate deaminase 2	AMPD2
706	AMPD3	0.925777	0.974657	1.0528	0.0365246	0.635341	0.391899	1.77244	1.66117	1.7354	1.78219	1.76341	1.71385	1.82798	1.59874	1.60477	1.73942	1.69674	1.61808	1.84695	1.59578	1.85968	2.41902	2.3748	2.2806	2.56114	2.02565	2.03477	2.35216	2.24052	2.08506	2.58626	2.03221	2.64212	272	chr11	10471868	10529126	5659	+	NM_001172431	protein_coding	.	P1116	adenosine monophosphate deaminase 3	AMPD3
707	AMPH	1.01851	0.975277	0.957549	0.727191	0.372818	0.43308	2.75468	2.78115	2.71856	2.71275	2.71071	2.79833	2.79444	2.6623	2.8674	2.91676	2.65913	2.70673	2.77981	2.64422	2.74008	5.50841	5.49934	5.95696	5.96287	5.32257	6.27894	6.58605	5.31382	5.5673	5.84194	5.27545	5.7099	273	chr7	38423297	38671167	3426	-	NM_139316	protein_coding	AMPH1	P28	amphiphysin	AMPH
708	AMT	1.08171	1.07545	0.994214	0.104614	0.384849	0.94719	0.812681	0.925994	0.917623	0.826311	0.807708	0.786148	0.830136	0.748714	0.998395	0.958211	0.984773	1.10329	0.587449	1.02476	0.903306	0.765761	0.743181	0.724555	0.781645	0.67912	0.994713	0.948293	0.978508	1.15597	0.499477	1.03913	0.87507	275	chr3	49454211	49460111	1941	-	NM_001164712	protein_coding	GCE|GCST|GCVT|NKH	P8818	aminomethyltransferase	AMT
709	AMTN	0.955264	0.973737	1.01934	0.168398	0.469418	0.355889	0.0660384	9.68442e-06	0.0276422	0.169871	0.0873198	0	0	1.1133e-05	2.37395e-05	0	3.86514e-06	0	3.43885e-05	0	0.107495	0.123683	0.0615916	0	0	0	0	0	0	0	0	0	0.0779136	401138	chr4	71384289	71398460	1087	+	NM_001286731	protein_coding	MGC148132|MGC148133|UNQ689	P12913	amelotin	AMTN
710	AMY1A	1	1	1	1	1	1	0	0	0	0	0	0	0	0	0	0	0	0	0	0	0	0	0	0	0	0	0	0	0	0	0	0	0	276	chr1	104198141	104292688	2615	+	NM_001008221	protein_coding	AMY1|AMY1B|AMY1C	P29856	amylase, alpha 1A (salivary)	AMY1A
711	AMY1B	1	1	1	1	1	1	0	0	0	0	0	0	0	0	0	0	0	0	0	0	0	0	0	0	0	0	0	0	0	0	0	0	0	277	chr1	104198325	104292688	2510	+	NM_001008218_1	protein_coding	AMY1|AMY1A|AMY1C|MGC177995	P29856	amylase, alpha 1B (salivary)	AMY1B
712	AMY1C	1	1	1	1	1	1	0	0	0	0	0	0	0	0	0	0	0	0	0	0	0	0	0	0	0	0	0	0	0	0	0	0	0	278	chr1	104198303	104301310	2108	+	NM_001008219_2	protein_coding	AMY1|AMY1A|AMY1B	P29856	amylase, alpha 1C (salivary)	AMY1C
713	AMY2A	1	1	1	1	1	1	0	0	0	0	0	0	0	0	0	0	0	0	0	0	0	0	0	0	0	0	0	0	0	0	0	0	0	279	chr1	104159954	104168402	1679	+	NM_000699	protein_coding	AMY2|AMY2B|PA	P9333	amylase, alpha 2A (pancreatic)	AMY2A
714	AMY2B	0.972972	0.943461	0.969669	0.736217	0.482812	0.655862	0.501084	0.461555	0.417119	0.735467	0.345708	0.485392	0.40646	0.425866	0.437047	0.325977	0.639121	0.523388	0.223678	0.397134	0.504986	0.659759	0.267591	0.400016	0.327229	0.342764	0.3525	0.255544	0.557103	0.440717	0.16639	0.3187	0.421525	280	chr1	104097266	104122156	2242	+	NM_020978	protein_coding	AMY2	P18642	amylase, alpha 2B (pancreatic)	AMY2B
715	AMZ1	0.978399	0.993126	1.01505	0.354792	0.827827	0.587153	0.161962	0.130456	0.15201	0.208494	0.105319	0.122894	0.208017	0.0873722	0.133871	0.158044	0.141588	0.248692	0.0958987	0.13303	0.125665	0.153767	0.0746067	0.0889325	0.155975	0.0622613	0.096762	0.116722	0.103039	0.189709	0.0681707	0.0972729	0.0917641	155185	chr7	2719156	2755070	4518	+	NM_133463	protein_coding	KIAA1950	P27299	archaelysin family metallopeptidase 1	AMZ1
716	AMZ2	1.02463	1.01127	0.986959	0.287881	0.717791	0.713077	5.08128	5.11638	5.09744	5.09526	5.0843	5.04719	5.09777	5.07673	5.18319	5.13653	5.06593	5.02349	5.21027	5.07741	5.07183	32.9084	32.6523	32.0675	33.3854	32.7017	35.2272	34.3623	32.4803	31.7433	35.8658	32.9065	32.7972	51321	chr17	66244145	66253305	1461	+	NM_001033572	protein_coding	.	P4533	archaelysin family metallopeptidase 2	AMZ2
717	AMZ2P1	0.988669	1.02096	1.03267	0.830492	0.722831	0.579024	0.608106	0.591665	0.638038	0.552693	0.610069	0.509431	0.748794	0.621899	0.661567	0.638959	0.433001	0.631551	0.591388	0.79684	0.517657	0.462055	0.521272	0.423546	0.683367	0.538026	0.579861	0.560644	0.349796	0.553509	0.504087	0.740469	0.434378	201283	chr17	62962668	62971703	3442	-	NR_026903	misc_RNA	DKFZp686D22101|FLJ32065|MGC90301	.	archaelysin family metallopeptidase 2 pseudogene 1	AMZ2P1
718	ANAPC1	0.986928	0.955306	0.967959	0.555609	0.332183	0.497248	3.93651	3.91753	3.87054	3.97956	3.92042	3.94931	3.89538	3.98023	3.89484	3.86675	3.92582	3.73185	4.02547	3.84894	3.86064	14.6533	14.024	14.4491	13.9402	14.7616	13.8332	13.6636	14.1911	12.3737	15.2196	13.4686	13.5952	64682	chr2	112525214	112641741	7736	-	NM_022662	protein_coding	APC1|MCPR|TSG24	P29574	anaphase promoting complex subunit 1	ANAPC1
719	ANAPC10	0.912262	0.867659	0.951107	0.135833	0.0343618	0.494196	3.58046	3.44798	3.37566	3.57039	3.51325	3.67688	3.55625	3.43988	3.36913	3.32666	3.6363	3.15952	3.44734	3.39142	3.48296	10.7905	10.3321	11.7906	10.8087	9.83786	9.30367	9.08426	11.4293	7.99441	9.8645	9.53573	10.2319	10393	chr4	145915727	146019693	2042	-	NR_046345	protein_coding	APC10|DKFZp564L0562|DOC1	.	anaphase promoting complex subunit 10	ANAPC10
720	ANAPC11	1.05914	1.09966	1.03826	0.182995	0.109728	0.430448	6.17574	6.25863	6.3128	6.05522	6.25006	6.14093	6.24766	6.26824	6.24776	6.33202	6.18256	6.43405	6.16979	6.283	6.35142	64.9468	74.4907	69.5748	75.3045	75.9705	74.7657	79.9941	71.5979	86.0444	70.6827	77.2033	81.0523	51529	chr17	79848666	79858409	1330	+	NM_001289414	protein_coding	APC11|Apc11p|MGC882	P28939	anaphase promoting complex subunit 11	ANAPC11
721	ANAPC13	1.07528	0.97741	0.908985	0.146507	0.533053	0.0247583	4.685	4.78971	4.65204	4.70263	4.60002	4.80527	4.62306	4.89247	4.71151	4.7316	4.81603	4.61447	4.66933	4.64092	4.68247	24.831	23.056	26.9623	23.7441	28.6621	25.1243	25.7072	27.1558	23.6593	24.3381	24.0544	24.8021	25847	chr3	134196546	134204865	2201	-	NM_001242375	protein_coding	APC13|DKFZp566D193|SWM1	P8207	anaphase promoting complex subunit 13	ANAPC13
722	ANAPC15	1.05141	0.980564	0.932616	0.643934	0.873203	0.505232	5.01806	5.09039	4.98975	4.61843	5.01351	5.17305	5.19654	5.12501	5.13589	5.24003	4.82918	5.21224	4.63647	5.06285	4.98754	23.3567	31.0411	35.0818	35.8193	33.849	34.059	36.9891	27.4131	36.314	23.7629	32.5653	30.8791	25906	chr11	71820633	71823822	1400	-	NM_001278494	protein_coding	.	P4368	anaphase promoting complex subunit 15	ANAPC15
723	ANAPC16	1.05415	0.971012	0.921129	0.192702	0.379047	0.0671937	3.90143	3.97751	3.85899	3.93884	3.84412	3.85253	3.96631	3.96102	4.09264	3.94057	3.90895	3.9075	3.76125	3.89369	3.869	14.2169	13.2487	13.4468	14.6925	14.553	16.0142	14.4326	14.0145	14.1028	12.503	13.9241	13.68	119504	chr10	73975758	73995618	3503	+	NR_038391	protein_coding	APC16|C10orf104|FLJ33728|MSAG|bA570G20.3	.	anaphase promoting complex subunit 16	ANAPC16
724	ANAPC1P1	0.983557	1.07238	1.0903	0.773422	0.190157	0.151618	0.223791	0.199872	0.324602	0.329415	0.253134	0.217806	0.083971	0.364697	0.19132	0.0920442	0.136305	0.285623	0.382673	0.412161	0.209023	0.253946	0.189626	0.162989	0.0605353	0.287148	0.141141	0.0666922	0.0989971	0.220865	0.30228	0.332219	0.157071	100286979	chr2	87088948	87122165	1771	+	NR_037931	misc_RNA	.	.	anaphase promoting complex subunit 1 pseudogene 1	ANAPC1P1
725	ANAPC2	1.0142	0.988416	0.974574	0.480132	0.711173	0.454305	4.15623	4.17657	4.13942	4.18695	4.16476	4.11643	4.15588	4.17277	4.23801	4.13142	4.16199	4.16094	4.21502	4.15556	4.01898	17.0709	16.7951	16.3465	16.8974	17.0115	17.8166	16.6169	16.893	17.0043	17.4955	16.895	15.29	29882	chr9	140069236	140083057	2700	-	NM_013366	protein_coding	APC2|RP11-350O14.5	P18007	anaphase promoting complex subunit 2	ANAPC2
726	ANAPC4	1.09671	0.995891	0.908073	0.0104873	0.890578	0.000503913	3.81828	3.95146	3.81234	3.88587	3.73596	3.87219	3.77345	3.95778	3.95635	3.96674	3.92461	3.8065	3.75978	3.83997	3.84159	13.6686	12.2189	13.645	12.73	14.5183	14.4801	14.714	14.1785	13.0821	12.4898	13.3784	13.4033	29945	chr4	25378848	25420120	2672	+	NM_013367	protein_coding	APC4	P6865	anaphase promoting complex subunit 4	ANAPC4
727	ANAPC5	1.00865	0.996554	0.988012	0.425307	0.726748	0.181077	6.0762	6.08861	6.07121	6.04643	6.09317	6.06916	6.09546	6.09872	6.10542	6.06496	6.08503	6.08123	6.05006	6.0805	6.07285	64.5518	66.7133	66.1499	67.6641	67.4373	67.6481	66.3079	66.8528	67.1634	64.975	66.962	66.6457	51433	chr12	121746048	121792012	2693	-	NM_001137559	protein_coding	APC5	P30528	anaphase promoting complex subunit 5	ANAPC5
728	ANAPC7	1.05285	1.01063	0.959898	0.0138915	0.671883	0.16414	5.18178	5.25608	5.19703	5.16274	5.18886	5.20665	5.16846	5.21265	5.30407	5.25537	5.25076	5.2843	5.13796	5.20098	5.16054	34.5302	35.1808	35.9319	35.113	36.0311	38.3932	37.399	37.0567	38.2286	34.0607	35.939	34.9413	51434	chr12	110810705	110841535	3795	-	NM_016238	protein_coding	APC7	P2845	anaphase promoting complex subunit 7	ANAPC7
729	ANG	0.976759	0.975562	0.998775	0.785655	0.763673	0.988834	1.19517	1.16124	1.15947	1.36092	1.19565	0.971617	1.2258	1.03626	0.960713	1.30374	1.31043	1.19128	1.24709	1.2714	0.898326	1.55592	1.27923	0.96116	1.34474	1.04918	0.942802	1.47664	1.47943	1.29284	1.36749	1.42016	0.869399	283	chr14	21152336	21157033	684	+	NM_001145	protein_coding	ALS9|HEL168|MGC22466|MGC71966|RNASE4|RNASE5	P23072	angiogenin	ANG
730	ANGEL1	0.916641	0.937469	1.02272	0.0107857	0.121604	0.574139	1.96305	1.83748	1.86989	1.98604	1.90438	2.0094	1.95021	1.89361	1.78773	1.86796	1.7978	1.83015	1.90589	1.97732	1.75679	2.93708	2.7202	3.02646	2.87656	2.71169	2.44477	2.66522	2.47559	2.57424	2.73514	2.9503	2.3924	23357	chr14	77253586	77279283	4111	-	NM_015305	protein_coding	FLJ60172|KIAA0759	P6219	angel homolog 1 (Drosophila)	ANGEL1
731	ANGEL2	1.02123	1.01292	0.991867	0.743689	0.85161	0.822101	3.07602	3.10633	3.09454	3.27743	2.90045	2.9702	3.12632	3.11902	3.12042	3.02827	3.15458	3.02291	3.20982	3.09405	3.04405	8.62674	6.40959	6.83719	7.76495	7.6771	7.67318	7.19847	7.90094	7.17826	8.21713	7.57194	7.28502	90806	chr1	213165524	213189217	5577	-	NM_144567	protein_coding	FLJ12793|KIAA0759L	P2825	angel homolog 2 (Drosophila)	ANGEL2
732	ANGPT1	0.966835	0.939252	0.971471	0.429913	0.0895057	0.434196	0.329921	0.281263	0.239505	0.227939	0.313852	0.399763	0.372176	0.254507	0.372895	0.168833	0.320781	0.260673	0.179848	0.228031	0.287251	0.169042	0.240464	0.319329	0.295763	0.192544	0.293915	0.125324	0.248853	0.199928	0.131794	0.172343	0.221773	284	chr8	108261710	108510254	4568	-	NM_001146	protein_coding	AGP1|AGPT|ANG1	P215	angiopoietin 1	ANGPT1
733	ANGPT2	1.04205	1.00939	0.968655	0.122253	0.732086	0.052216	0.12356	0.182989	0.137043	0.0868322	0.113931	0.0726539	0.216387	0.165757	0.197664	0.184018	0.184337	0.133733	0.166014	0.160829	0.0862169	0.061028	0.0809938	0.051661	0.162718	0.121502	0.14624	0.137085	0.136201	0.0982027	0.121175	0.118691	0.0621866	285	chr8	6357175	6420784	5264	-	NM_001147	protein_coding	AGPT2|ANG2	P13281	angiopoietin 2	ANGPT2
734	ANGPT4	1.03809	1.02655	0.988879	0.254142	0.342235	0.773962	0.0308724	0.0848072	0.0686738	0.000130602	0.0417837	0.0422448	0.0388966	0.0415042	0.0460033	0.0426994	0.202333	0.163224	0.0562809	0	0.0502434	0	0.028855	0.0297216	0.0275887	0.0290962	0.0321959	0.0303947	0.150469	0.120857	0.039444	0	0.0357997	51378	chr20	853297	896960	1921	-	NM_015985	protein_coding	AGP4|ANG-3|ANG4|MGC138181|MGC138183	P10669	angiopoietin 4	ANGPT4
735	ANGPTL1	1.01735	1.0239	1.00644	0.586957	0.41447	0.863822	0.0536046	0.0784241	0.0876834	0.0848216	0.0638936	0.064303	0	0.021416	0.15851	0.12745	9.17102e-06	0.0575439	0.0293992	0.182654	0.0764231	0.0596947	0.0445664	0.0455888	0	0.0148919	0.115664	0.0930994	0	0.0412477	0.020353	0.135713	0.0548849	9068	chr1	178818670	178840215	3546	-	NM_004673	protein_coding	ANG3|ANGPT3|ARP1|AngY|KIAA0351|UNQ162|dJ595C2.2	P11131	angiopoietin like 1	ANGPTL1
736	ANGPTL2	0.917208	0.97179	1.05951	0.317149	0.668754	0.259035	1.17392	1.04925	1.13264	1.31777	0.909711	1.14152	1.29124	1.13664	1.11628	0.831585	1.09193	1.12319	1.10879	1.15419	1.14396	1.48088	0.869723	1.20627	1.45338	1.19689	1.1641	0.785195	1.13099	1.18691	1.15121	1.23119	1.21625	23452	chr9	129849628	129885044	3572	-	NM_012098	protein_coding	ARP2|HARP|MGC8889	P23793	angiopoietin like 2	ANGPTL2
737	ANGPTL3	0.99908	0.966936	0.967827	0.962771	0.0315527	0.150899	0.0819812	0.0806531	0.0334738	0.0523257	0.101935	0.0780141	0.0951429	0.101304	0.138763	0.0266875	0.053268	0	0.0356135	0.0661078	0.0314134	0.0363145	0.0722583	0.0555742	0.0686391	0.072581	0.100536	0.0189403	0.0375756	0	0.0247369	0.0472655	0.0222847	27329	chr1	63063158	63071976	2951	+	NM_014495	protein_coding	ANGPT5	P14223	angiopoietin like 3	ANGPTL3
738	ANGPTL4	7.73979	7.76525	1.00329	5.4078e-10	6.47456e-08	0.91141	3.28871	6.241	6.24574	3.20953	3.32454	3.11019	3.48359	6.21237	6.25289	6.22268	6.2752	6.32006	6.1771	6.17993	6.2998	8.15169	8.91335	7.63615	10.2445	73.0501	75.0438	74.0703	76.4142	79.4154	71.0579	71.8016	78.1553	51129	chr19	8429011	8439259	2088	+	NR_104213	protein_coding	ANGPTL2|ARP4|FIAF|HFARP|NL2|PGAR|pp1158	.	angiopoietin like 4	ANGPTL4
739	ANGPTL5	0.994147	1.0094	1.01534	0.35534	0.408452	0.134307	0.00847193	3.12669e-06	0.0219661	2.11919e-05	2.11269e-05	0.0335519	0	3.59436e-06	7.66449e-06	0	1.24789e-06	0	0.0448881	0.0423164	0	0	0	0.0235338	0	0	0	0	0	0	0.031354	0.0300035	0	253935	chr11	101761405	101787253	2368	-	NM_178127	protein_coding	.	P27661	angiopoietin like 5	ANGPTL5
740	ANGPTL6	0.931089	1.06792	1.14696	0.593737	0.629475	0.156348	0.933861	0.830852	1.02866	0.739186	1.30986	0.57925	0.999317	0.762623	1.02859	0.73009	0.782076	1.08578	0.800014	1.24602	0.944881	0.662192	1.46841	0.494149	1.0035	0.695351	1.03681	0.663339	0.719172	1.13015	0.737226	1.37726	0.930039	83854	chr19	10203013	10213425	1857	-	NM_031917	protein_coding	AGF|ARP5	P7371	angiopoietin like 6	ANGPTL6
741	ANGPTL7	1.03737	1.02377	0.986889	0.580197	0.655523	0.859865	0.176856	0.229782	0.210742	0.0686497	0.194554	0.227645	0.211189	0.132121	0.45624	0.168303	0.136231	0.336728	0.177531	0.0436503	0.268528	0.0477508	0.142612	0.170947	0.158591	0.0956646	0.370865	0.1248	0.0989459	0.264932	0.130071	0.0311322	0.205869	10218	chr1	11249346	11256038	2290	+	NM_021146	protein_coding	AngX|CDT6|RP4-647M16.2|dJ647M16.1	P17879	angiopoietin like 7	ANGPTL7
742	ANHX	1	1	1	1	1	1	0	0	0	0	0	0	0	0	0	0	0	0	0	0	0	0	0	0	0	0	0	0	0	0	0	0	0	647589	chr12	133794898	133812422	1765	-	NM_001191054	protein_coding	.	P17548	anomalous homeobox	ANHX
743	ANK1	1.01378	1.0395	1.02537	0.567483	0.407068	0.576288	1.3019	1.32164	1.35778	1.29701	1.26178	1.27508	1.37122	1.28014	1.29348	1.3733	1.33776	1.39454	1.3202	1.21723	1.48573	1.4442	1.38526	1.42029	1.59385	1.42644	1.4465	1.59959	1.5268	1.64043	1.4901	1.33145	1.80935	286	chr8	41510744	41754280	8861	-	NM_020476	protein_coding	ANK|SPH1|SPH2	P22053	ankyrin 1	ANK1
744	ANK2	0.976591	1.00136	1.02536	0.497934	0.964808	0.488313	2.06566	2.03149	2.06762	2.01274	2.09621	2.13014	2.02009	2.10314	2.04334	1.92185	2.05156	2.07253	2.00103	2.04402	2.14887	3.00921	3.24847	3.37795	3.06959	3.29176	3.11231	2.80554	3.14395	3.22861	2.98915	3.13789	3.45177	287	chr4	113739239	114304896	14521	+	NM_001127493	protein_coding	DKFZp686M09125|DKFZp686P0948|FLJ38277|LQT4	P17124	ankyrin 2, neuronal	ANK2
745	ANK3	1.04292	1.02317	0.981066	0.263422	0.400216	0.65269	0.589322	0.649951	0.622373	0.58039	0.621016	0.587518	0.567823	0.592041	0.573406	0.648711	0.776765	0.669715	0.575814	0.549697	0.68936	0.49031	0.532811	0.502723	0.484781	0.506527	0.486256	0.57126	0.71293	0.595231	0.487939	0.466274	0.615891	288	chr10	61786056	62493284	18843	-	NM_001149	protein_coding	ANKYRIN-G|FLJ45464	P30511	ankyrin 3, node of Ranvier (ankyrin G)	ANK3
746	ANKAR	1.03674	1.00242	0.966897	0.502985	0.93945	0.532292	0.337051	0.389099	0.340533	0.296013	0.280753	0.352749	0.414808	0.235712	0.395856	0.35707	0.550179	0.369408	0.29595	0.279591	0.413087	0.225092	0.212263	0.277029	0.334789	0.177092	0.314577	0.282775	0.464037	0.294322	0.226301	0.215193	0.333484	150709	chr2	190540711	190611376	4416	+	NM_144708	protein_coding	FLJ25415	P1782	ankyrin and armadillo repeat containing	ANKAR
747	ANKDD1A	0.938308	1.0218	1.08898	0.417314	0.798637	0.40233	0.852716	0.760849	0.88383	0.788281	0.960984	0.719476	0.928543	0.515024	0.922545	0.696491	0.874143	1.1388	0.688009	0.773844	0.893919	0.720086	0.938683	0.646667	0.907334	0.428116	0.892653	0.624757	0.83248	1.20947	0.607738	0.713396	0.862763	348094	chr15	65204101	65251041	3112	+	NM_182703	protein_coding	FLJ25870|MGC120305|MGC120306|MGC120307	P22455	ankyrin repeat and death domain containing 1A	ANKDD1A
748	ANKDD1B	1.01098	1.00725	0.99631	0.356084	0.356171	0.786491	9.13854e-06	0.0157699	0.0104367	1.83051e-05	1.82489e-05	0	0	3.10473e-06	6.62041e-06	0	0.0620618	0.041292	9.59021e-06	0	0	0	0	0	0	0	0	0	0.0439213	0.0294014	0	0	0	728780	chr5	74907301	74967671	2552	+	NM_001276713	protein_coding	.	P25713	ankyrin repeat and death domain containing 1B	ANKDD1B
749	ANKEF1	0.877879	0.854599	0.973481	0.0442817	0.00472087	0.657867	1.29448	1.10658	1.0678	1.38382	1.27587	1.2547	1.25963	1.01142	1.30242	1.06607	1.02669	0.958286	1.15109	1.11783	1.03629	1.59692	1.40965	1.38633	1.40034	1.01421	1.46206	1.10047	1.03676	0.95084	1.2151	1.17576	1.05699	63926	chr20	10015647	10037410	3922	+	NM_198798	protein_coding	.	P2620	ankyrin repeat and EF-hand domain containing 1	ANKEF1
750	ANKFN1	1.02771	0.979862	0.953441	0.471169	0.622255	0.215871	0.310842	0.350277	0.281492	0.212931	0.34553	0.401377	0.276554	0.394762	0.321504	0.406859	0.273891	0.387693	0.281059	0.231605	0.219437	0.156935	0.267824	0.320807	0.212552	0.314209	0.248662	0.327836	0.208921	0.310781	0.213789	0.175295	0.165567	162282	chr17	54230836	54560007	2426	+	NM_153228	protein_coding	FLJ38335	P5252	ankyrin repeat and fibronectin type III domain containing 1	ANKFN1
751	ANKFY1	0.977032	0.969469	0.992259	0.465888	0.269769	0.807069	3.7309	3.69738	3.68617	3.75892	3.7368	3.76966	3.65546	3.68063	3.79212	3.62813	3.68365	3.62694	3.72982	3.7314	3.65356	12.4343	12.2298	12.6403	11.6511	11.8059	12.8148	11.4279	11.8437	11.4338	12.214	12.3353	11.6431	51479	chr17	4066665	4167274	8209	-	NR_047571	protein_coding	ANKHZN|DKFZp686M19106|KIAA1255|ZFYVE14	.	ankyrin repeat and FYVE domain containing 1	ANKFY1
752	ANKH	0.97343	0.975205	1.00182	0.494537	0.633962	0.964434	2.93608	2.89723	2.89986	3.05931	2.89885	2.82754	2.9487	2.91265	2.9072	2.83896	2.9285	2.7458	3.00175	2.93426	2.90559	7.27657	6.40404	6.0993	6.74913	6.52068	6.48179	6.18977	6.6099	5.74911	6.97959	6.6726	6.52605	56172	chr5	14704909	14871887	8207	-	NM_054027	protein_coding	ANK|CCAL2|CMDJ|CPPDD|FLJ27166|HANK|MANK	P30348	ANKH inorganic pyrophosphate transport regulator	ANKH
753	ANKHD1	0.959777	0.945237	0.98485	0.435644	0.259418	0.713992	3.89709	3.83786	3.81584	3.89258	3.77176	4.0335	3.87845	3.96529	3.81068	3.7669	3.80032	3.75721	3.89824	3.75775	3.84513	13.7373	12.5518	15.3775	13.7654	14.5994	12.9926	12.6833	12.9255	12.6096	13.85	12.5825	13.4385	54882	chr5	139781399	139919441	1321	+	NM_024668	protein_coding	MASK|VBARP	P14734	ankyrin repeat and KH domain containing 1	ANKHD1
754	ANKHD1-EIF4EBP3	0.994832	0.993778	0.99894	0.938357	0.92965	0.987375	3.44324	3.43576	3.43423	3.33263	3.62239	3.34271	3.45601	3.26459	3.55967	3.48588	3.41667	3.345	3.29082	3.59366	3.4877	8.99663	11.2249	9.1461	10.0165	8.59761	10.7597	10.259	9.67391	9.22584	8.74679	11.1193	10.2684	404734	chr5	139781399	139929163	8349	+	NM_020690	protein_coding	MASK-BP3|MASK-BP3arf	P32939	ANKHD1-EIF4EBP3 readthrough	ANKHD1-EIF4EBP3
755	ANKIB1	0.968659	0.995125	1.02732	0.415035	0.91096	0.576215	3.71783	3.67189	3.71078	3.74638	3.63936	3.78962	3.69153	3.74713	3.59777	3.59933	3.73622	3.59461	3.825	3.75423	3.65848	12.3179	11.3644	12.8303	11.971	12.4101	11.0727	11.1825	12.3204	11.1586	13.1161	12.5478	11.6862	54467	chr7	91875548	92030698	6081	+	NM_019004	protein_coding	DKFZp434A0225|FLJ33123|KIAA1386	P15916	ankyrin repeat and IBR domain containing 1	ANKIB1
756	ANKK1	0.978913	0.978913	1	0.205638	0.205634	0.917453	0.0307499	3.1446e-06	2.79156e-06	2.13133e-05	0.0900425	0.0310502	0	3.61495e-06	7.70839e-06	0	1.25504e-06	0	1.11662e-05	0	0	0	0.0636173	0.0217602	0	0	0	0	0	0	0	0	0	255239	chr11	113258513	113271140	2543	+	NM_178510	protein_coding	PKK2	P20657	ankyrin repeat and kinase domain containing 1	ANKK1
757	ANKLE1	0.881037	0.99172	1.12563	0.0733652	0.921664	0.213519	0.766101	0.583376	0.754106	0.82017	0.600117	0.87306	0.756745	0.654788	0.625469	0.649374	0.387165	0.696331	1.02635	0.664311	0.58908	0.759034	0.510515	0.831631	0.692858	0.573425	0.540727	0.572182	0.307577	0.625228	1.03279	0.58779	0.50746	126549	chr19	17392454	17398455	3255	+	NM_001278443	protein_coding	ANKRD41|FLJ39369|LEM3|LEMD6	P35647	ankyrin repeat and LEM domain containing 1	ANKLE1
758	ANKLE2	1.1034	1.06755	0.967508	0.0121497	0.00683445	0.266038	4.79264	4.9346	4.88695	4.8282	4.81217	4.77514	4.75386	4.86346	5.02426	4.90052	4.94515	4.86729	4.91366	4.91439	4.85136	27.1783	26.8673	26.3845	26.0931	28.0706	31.4495	29.0251	29.7918	28.3812	29.0147	29.2825	28.0068	23141	chr12	133302253	133338474	4482	-	NM_015114	protein_coding	FLJ22280|FLJ36132|KIAA0692|LEMD7	P33915	ankyrin repeat and LEM domain containing 2	ANKLE2
759	ANKMY1	0.963542	1.04476	1.08429	0.537932	0.424225	0.148858	2.10029	2.0467	2.16345	2.01189	2.11737	2.00306	2.25434	1.95558	2.19608	1.97385	2.04867	2.0858	2.26352	2.2046	2.09196	3.00638	3.31084	3.00882	3.78671	2.87432	3.57166	2.94537	3.13564	3.26804	3.78559	3.62493	3.28003	51281	chr2	241418839	241500527	3524	-	NM_001282771	protein_coding	DKFZp686D20155|DKFZp686L21237|FLJ20499|ZMYND13	P6699	ankyrin repeat and MYND domain containing 1	ANKMY1
760	ANKMY2	1.13072	1.11679	0.987682	0.0360238	0.030913	0.752585	2.71577	2.89301	2.87513	2.67057	2.60597	2.83306	2.74351	2.95861	2.7653	2.95507	2.88469	2.885	2.95009	2.86125	2.80019	5.3195	5.04239	6.12648	5.72216	6.76439	5.7809	6.79075	6.38235	6.43065	6.69931	6.29372	5.99572	57037	chr7	16639401	16685442	2555	-	NM_020319	protein_coding	DKFZp564O043|ZMYND20	P33391	ankyrin repeat and MYND domain containing 2	ANKMY2
761	ANKRA2	0.882702	0.956799	1.08394	0.128832	0.519633	0.16464	1.61868	1.43867	1.55496	1.62766	1.36801	1.71122	1.73902	1.32429	1.53135	1.34011	1.54424	1.53227	1.65613	1.44279	1.58039	2.07272	1.56626	2.27461	2.34758	1.50162	1.88461	1.54136	1.91552	1.90597	2.14242	1.72662	2.00067	57763	chr5	72848025	72861511	2198	-	NM_023039	protein_coding	ANKRA	P24349	ankyrin repeat family A member 2	ANKRA2
762	ANKRD1	1.38138	1.34992	0.977229	6.78341e-06	8.24753e-05	0.375739	9.16429	9.6304	9.59717	9.06799	9.19942	9.21306	9.17225	9.6386	9.5866	9.64706	9.64844	9.63418	9.49935	9.63484	9.61595	531.25	582.035	592.544	578.381	794.968	765.568	805.142	801.154	799.077	719.61	797.452	787.574	27063	chr10	92671857	92681032	1974	-	NM_014391	protein_coding	ALRP|C-193|CARP|CVARP|MCARP|bA320F15.2	P27869	ankyrin repeat domain 1	ANKRD1
763	ANKRD10	0.999887	0.929174	0.92928	0.998357	0.115218	0.171227	3.887	3.88683	3.78102	3.83786	3.91788	3.78259	4.00024	3.76023	4.03998	3.88231	3.85052	3.69023	3.82584	3.78731	3.81673	13.1879	13.9988	12.7631	15.0649	12.532	15.4046	13.8216	13.4186	11.9931	13.1225	12.8634	13.1574	55608	chr13	111530887	111567454	3395	-	NR_104587	protein_coding	DKFZp686B07190|FLJ20093	.	ankyrin repeat domain 10	ANKRD10
764	ANKRD11	1.03822	1.03767	0.999469	0.160092	0.250513	0.985276	5.53689	5.591	5.59023	5.49907	5.56267	5.59456	5.48856	5.5533	5.65312	5.56793	5.58762	5.60445	5.49741	5.65782	5.59664	43.8559	45.8805	47.3252	44.0857	45.893	49.1746	46.6906	47.0656	47.9784	43.98	49.6994	47.6263	29123	chr16	89334029	89556969	10204	-	NM_001256183	protein_coding	ANCO-1|ANCO1|LZ16|T13	P9638	ankyrin repeat domain 11	ANKRD11
765	ANKRD12	1.13673	1.16272	1.02286	0.00915813	0.00219643	0.195284	2.99167	3.17655	3.20917	2.95369	2.98929	3.1131	2.9021	3.14337	3.19385	3.13673	3.23021	3.19998	3.21711	3.21601	3.20348	6.68798	6.88063	7.65324	6.50471	7.82472	8.12618	7.83818	8.38003	8.24502	8.26358	8.32767	8.25239	23253	chr18	9136751	9285983	11623	+	NM_015208	protein_coding	ANCO-2|ANCO1|FLJ20053|GAC-1|KIAA0874|Nbla00144	P4847	ankyrin repeat domain 12	ANKRD12
766	ANKRD13A	0.956351	0.947847	0.991109	0.00523331	0.0317122	0.684867	5.3085	5.24411	5.23123	5.29388	5.32042	5.32285	5.29661	5.24799	5.25438	5.20606	5.2673	5.18423	5.1834	5.26623	5.28796	37.9132	38.6375	39.0297	38.4666	36.9492	37.0585	36.1106	37.4953	35.6031	35.1826	37.6479	38.2587	88455	chr12	110437235	110477235	3908	+	NM_033121	protein_coding	ANKRD13|NY-REN-25	P33190	ankyrin repeat domain 13A	ANKRD13A
767	ANKRD13B	1.0898	1.07894	0.99003	0.0902713	0.0975395	0.76339	2.99147	3.11553	3.10108	2.9684	3.11598	2.87427	2.99686	3.12248	3.20886	3.09218	3.03301	3.04711	3.16292	3.12753	3.06369	6.76781	7.60632	6.33305	7.01321	7.69799	8.22204	7.56913	7.18158	7.31612	7.92228	7.77277	7.39824	124930	chr17	27920527	27941779	3173	+	NM_152345	protein_coding	FLJ20418|FLJ25555	P20780	ankyrin repeat domain 13B	ANKRD13B
768	ANKRD13C	0.960583	0.904291	0.941398	0.0352167	0.00913645	0.0673099	4.11285	4.05483	3.96771	4.12866	4.07766	4.09946	4.14468	4.02303	4.04312	4.05659	4.0956	3.8689	3.95382	3.99984	4.04256	16.357	15.7536	16.1437	16.7577	15.2358	15.4386	15.7257	16.0883	13.707	14.4315	15.0641	15.5566	81573	chr1	70724685	70820417	5667	-	NM_030816	protein_coding	DKFZp566D1346|FLJ14998|RP4-677H15.5|dJ677H15.3	P315	ankyrin repeat domain 13C	ANKRD13C
769	ANKRD13D	0.977839	0.939401	0.960691	0.638768	0.162745	0.387657	3.81336	3.78103	3.72317	3.9255	3.7277	3.77507	3.8177	3.6972	3.91369	3.78369	3.71956	3.78143	3.74837	3.61174	3.74537	14.0798	12.1451	12.6915	13.1562	11.9536	14.0295	12.8422	12.1674	12.8383	12.3844	11.2755	12.4739	338692	chr11	67056762	67069955	2483	+	NM_207354	protein_coding	MGC50828	P29860	ankyrin repeat domain 13 family member D	ANKRD13D
770	ANKRD16	0.991015	0.988607	0.99757	0.848721	0.800299	0.964068	2.66677	2.65375	2.65024	2.56526	2.66867	2.74064	2.68695	2.75504	2.49158	2.67836	2.67719	2.77538	2.68168	2.56671	2.56649	4.87596	5.31358	5.68427	5.46278	5.74271	4.60907	5.431	5.39344	5.88578	5.39227	4.94688	4.94932	54522	chr10	5903689	5931860	2829	-	NM_019046	protein_coding	.	P5367	ankyrin repeat domain 16	ANKRD16
771	ANKRD17	0.983267	0.99001	1.00686	0.468562	0.737512	0.837309	4.68562	4.66128	4.67114	4.73515	4.67321	4.67632	4.65658	4.65824	4.69218	4.5862	4.70556	4.60809	4.77508	4.63226	4.6634	25.4217	24.3105	24.5716	24.3249	24.2162	24.7769	23.1481	25.0801	23.5498	26.267	23.904	24.4628	26057	chr4	73940502	74124502	9516	-	NM_198889	protein_coding	FLJ22206|GTAR|KIAA0697|NY-BR-16	P34770	ankyrin repeat domain 17	ANKRD17
772	ANKRD18A	1.04279	1.04827	1.00526	0.441448	0.529234	0.949373	2.83859	2.89904	2.9066	2.84078	2.9129	2.84627	2.74978	2.81164	3.06974	2.7972	2.90095	2.66942	2.92479	3.12769	2.86756	6.11167	6.47708	6.19204	5.75173	6.01205	7.37487	5.98463	6.466	5.40133	6.56495	7.7721	6.33025	253650	chr9	38571361	38620360	3738	-	NM_147195	protein_coding	FLJ35740|FLJ40632|KIAA2015|MGC176674	P4103	ankyrin repeat domain 18A	ANKRD18A
773	ANKRD18B	1.07114	1.01056	0.943447	0.00454264	0.620866	0.0327329	0.170189	0.269334	0.185347	0.191952	0.155062	0.137663	0.195253	0.241966	0.266684	0.318141	0.24931	0.182074	0.182809	0.125053	0.24879	0.140552	0.111926	0.10014	0.145833	0.18226	0.202262	0.248299	0.188517	0.135917	0.134197	0.0912633	0.189445	441459	chr9	33524411	33573001	3753	+	NM_001244752	protein_coding	bA255A11.3|bA255A11.5	P17518	ankyrin repeat domain 18B	ANKRD18B
774	ANKRD18DP	0.986076	0.99163	1.00563	0.167659	0.454423	0.355888	0.0202316	2.89854e-06	0.00810541	0.0532279	1.95853e-05	0.0270007	0	3.33209e-06	7.10523e-06	0	1.15684e-06	0	1.02925e-05	0	0.0321419	0.0370468	0	0.0188958	0	0	0	0	0	0	0	0	0.0227517	348840	chr3	197784404	197807542	2895	-	NR_003291	misc_RNA	.	.	ankyrin repeat domain 18D, pseudogene	ANKRD18DP
775	ANKRD19P	1.06145	1.02376	0.964495	0.0526138	0.281995	0.0787276	0.114555	0.200585	0.14843	0.10052	0.192958	0.0682343	0.0933805	0.162028	0.211993	0.259116	0.167056	0.134161	0.134171	0.16701	0.158085	0.0710493	0.141463	0.048444	0.0674123	0.118608	0.157655	0.198049	0.122676	0.0985415	0.0967705	0.123516	0.11668	138649	chr9	95571893	95600739	2307	+	NR_026868	misc_RNA	.	.	ankyrin repeat domain 19, pseudogene	ANKRD19P
776	ANKRD2	1.01768	1.02551	1.0077	0.698386	0.625793	0.90091	0.073489	0.0987694	0.109837	0.115644	0.115161	0.060018	0	0.206367	7.28252e-05	0.175813	1.18571e-05	0.286902	0.000105493	0.0697437	0.0659902	0.0823663	0.0820096	0.042488	0	0.153509	0	0.130541	0	0.221645	0	0.0499463	0.0472657	26287	chr10	99332198	99343641	1509	+	NM_001129981	protein_coding	ARPP|MGC104314	P27456	ankyrin repeat domain 2	ANKRD2
777	ANKRD20A1	0.99704	1.06161	1.06477	0.896659	0.109436	0.0435993	0.038069	0.0337918	0.124327	0.12643	0.0219988	0	0	0.0429154	0.0476755	0.0220884	0.0222988	0.0865233	0.220784	0.108147	0.0772136	0.0904854	0.0150007	0	0	0.0301003	0.033386	0.0156704	0.0155546	0.0625173	0.164528	0.0783629	0.0554583	84210	chr9	67926761	67969840	2217	+	NM_032250	protein_coding	ANKRD20A|DKFZp434A171	P24220	ankyrin repeat domain 20 family member A1	ANKRD20A1
778	ANKRD20A11P	0.976244	0.946514	0.969547	0.639013	0.207062	0.355965	0.0793152	0.0446288	1.13922e-05	0.22594	0.0793297	0	0	1.47523e-05	0.170768	0	5.12171e-06	0	4.55682e-05	0	0	0.167965	0.0557586	0	0	0	0.125187	0	0	0	0	0	0	391267	chr21	15316096	15352765	1089	-	NR_027270	misc_RNA	.	.	ankyrin repeat domain 20 family member A11, pseudogene	ANKRD20A11P
779	ANKRD20A12P	1.14256	0.992979	0.869086	0.052184	0.933691	0.162457	0.42096	0.613224	0.410796	0.442588	0.508047	0.376888	0.351142	0.406325	0.720872	0.684922	0.620678	0.180094	0.482829	0.6682	0.260806	0.355266	0.418024	0.298581	0.277255	0.324697	0.646298	0.610908	0.537321	0.134862	0.395393	0.591661	0.199824	100874392	chr1	142697421	142713605	1744	-	NR_046228	misc_RNA	.	.	ankyrin repeat domain 20 family member A12, pseudogene	ANKRD20A12P
780	ANKRD20A19P	0.997416	0.997415	1	0.355758	0.355752	0.917452	0.00373383	3.81902e-07	3.39028e-07	2.58845e-06	2.58051e-06	0.0148726	0	4.39026e-07	9.36163e-07	0	1.52421e-07	0	1.35611e-06	0	0	0	0	0.0103647	0	0	0	0	0	0	0	0	0	400110	chr13	24481423	24523454	5096	-	NR_073430	misc_RNA	.	.	ankyrin repeat domain 20 family member A19, pseudogene	ANKRD20A19P
781	ANKRD20A2	0.992437	1.00566	1.01332	0.482175	0.714002	0.402682	0.0273257	0.0163737	0.0354659	0.043543	0.0433456	0.0219662	0	0.042884	2.00149e-05	0.0221461	3.25873e-06	0.0865999	2.89932e-05	0.0277133	0.0261217	0.0301514	0.0300135	0.0153462	0	0.0300887	0	0.015671	0	0.0625173	0	0.0195823	0.0184778	441430	chr9	42368303	43129917	5413	+	NM_001012421	protein_coding	MGC176486	P32217	ankyrin repeat domain 20 family member A2	ANKRD20A2
782	ANKRD20A3	0.999997	1	1	0.486286	0.924796	0.531731	1.12601e-05	7.12597e-06	1.07492e-05	1.49716e-05	1.507e-05	1.49986e-05	0	1.49174e-05	7.31011e-09	1.35779e-05	1.19019e-09	1.41864e-05	1.05893e-08	1.39471e-05	1.48527e-05	9.8738e-06	9.94062e-06	1.04027e-05	0	1.02546e-05	0	9.71592e-06	0	1.02301e-05	0	9.91506e-06	1.05963e-05	441425	chr9	42368337	67966773	5786	+	NM_001012419_2	protein_coding	MGC176486|MGC198508	P32217	ankyrin repeat domain 20 family member A3	ANKRD20A3
783	ANKRD20A4	1.03631	1.03576	0.999472	0.0577224	0.336455	0.98747	0.0524898	0.103947	0.103185	0.0855689	0.0220228	0.0219415	0.0791554	0.10472	0.116008	0.128506	0.0657925	0	0.168519	0.184145	0.0517482	0.060216	0.0149852	0.01533	0.0568334	0.0751138	0.083341	0.0939199	0.0466152	0	0.123182	0.136905	0.0369121	728747	chr9	69381981	69425109	3517	+	NM_001098805	protein_coding	.	P34687	ankyrin repeat domain 20 family member A4	ANKRD20A4
784	ANKRD20A5P	1.00225	1.00321	1.00096	0.91446	0.957835	0.986993	0.595991	0.599238	0.600617	0.655206	0.544219	0.563896	0.617972	0.610163	0.560342	0.599027	0.6266	0.784898	0.610721	0.392182	0.587932	0.569573	0.453572	0.478316	0.537311	0.525578	0.472895	0.51796	0.54362	0.727884	0.524385	0.314385	0.506039	440482	chr18	14179096	14227049	3707	+	NR_040113	misc_RNA	.	.	ankyrin repeat domain 20 family member A5, pseudogene	ANKRD20A5P
785	ANKRD20A8P	1.01357	1.02907	1.01529	0.602181	0.11519	0.486637	0.0764295	0.0958809	0.117775	0.120982	0.0815837	0.0821419	0.019173	0.0206626	0.153152	0.123	0.0833185	0.109241	0.1359	0.128089	0.0975509	0.086346	0.0573005	0.0585997	0.0135771	0.014357	0.111521	0.0897472	0.0593995	0.0795333	0.0981404	0.0934568	0.0705477	729171	chr2	95426673	95522820	3509	-	NR_003366	misc_RNA	.	.	ankyrin repeat domain 20 family member A8, pseudogene	ANKRD20A8P
786	ANKRD20A9P	0.99351	0.987385	0.993835	0.785656	0.51659	0.787609	0.262263	0.25287	0.243948	0.27939	0.308147	0.241993	0.217865	0.231693	0.32584	0.246347	0.204759	0.265697	0.281091	0.211594	0.216136	0.211366	0.235664	0.182652	0.164032	0.173861	0.252472	0.18761	0.15238	0.204068	0.213895	0.158991	0.162811	284232	chr13	19408543	19446109	37567	-	NR_027995	misc_RNA	.	.	ankyrin repeat domain 20 family member A9, pseudogene	ANKRD20A9P
787	ANKRD22	0.991743	0.988436	0.996665	0.741181	0.656343	0.833168	0.0650699	0.0531079	0.0482891	0.0752916	0.145764	0	0.0351341	0.0376077	0.0211021	0.0763362	0.0765703	0.075952	6.14132e-05	0.0482034	0.0677438	0.0528061	0.105127	0	0.0248918	0.0263274	0.0146107	0.0548465	0.0544624	0.054693	0	0.0342761	0.0485066	118932	chr10	90579659	90611732	3983	-	NM_144590	protein_coding	MGC22805	P491	ankyrin repeat domain 22	ANKRD22
788	ANKRD23	0.963154	0.989239	1.02708	0.0723725	0.795483	0.544401	1.0511	0.996935	1.03549	1.01077	1.08079	1.06441	1.04748	0.97513	0.950459	1.03099	1.02948	1.00606	1.1404	1.09829	0.883915	1.00576	1.10553	1.09144	1.07177	0.964292	0.929294	1.04958	1.04074	1.016	1.19912	1.14614	0.850411	200539	chr2	97503651	97509758	2582	-	NM_144994	protein_coding	DARP|FLJ32449|MARP3|MGC129593	P27676	ankyrin repeat domain 23	ANKRD23
789	ANKRD24	1.03132	0.989633	0.959582	0.000480813	0.614162	0.071744	0.0820921	0.12658	0.0670577	0.0924935	0.0742235	0.0927276	0.0687642	0.126049	0.120461	0.129777	0.130011	0.146793	0.0257937	0.0476224	0.0448933	0.0652666	0.0519735	0.0663964	0.0492202	0.0911055	0.0866772	0.0948951	0.0942332	0.108151	0.0178072	0.0338891	0.0319722	170961	chr19	4183351	4224811	4026	+	NM_133475	protein_coding	KIAA1981	P3677	ankyrin repeat domain 24	ANKRD24
790	ANKRD26	0.920941	0.925037	1.00445	0.0102072	0.00498686	0.85227	2.3723	2.25349	2.25989	2.3435	2.34678	2.37629	2.42129	2.23744	2.18468	2.27706	2.31166	2.22276	2.27028	2.30671	2.23836	4.04136	4.05295	4.19244	4.3746	3.71015	3.53495	3.86849	3.96258	3.69415	3.80702	3.96496	3.73794	22852	chr10	27293045	27389427	6776	-	NM_014915	protein_coding	MGC163325|bA145E8.1	P7009	ankyrin repeat domain 26	ANKRD26
791	ANKRD26P1	1.00016	1.00111	1.00095	0.965993	0.789928	0.822032	0.00618392	0.00641223	0.00778081	0.0123736	1.40994e-05	0.0122953	0	0.0121016	0.0134894	0	8.32799e-07	0.0164154	7.40952e-06	0	0.0146164	0.00843493	0	0.00856115	0	0.00839364	0.00932489	0	0	0.0116257	0	0	0.0103046	124149	chr16	46503249	46603009	6123	-	NR_026556	misc_RNA	DKFZp781D1722|FLJ43980|MGC87661	.	ankyrin repeat domain 26 pseudogene 1	ANKRD26P1
792	ANKRD26P3	1	1	1	1	1	1	0	0	0	0	0	0	0	0	0	0	0	0	0	0	0	0	0	0	0	0	0	0	0	0	0	0	0	100101938	chr13	19836940	19919113	3726	-	NR_027248	misc_RNA	.	.	ankyrin repeat domain 26 pseudogene 3	ANKRD26P3
793	ANKRD27	1.04562	1.06301	1.01663	0.0921934	0.0226711	0.432824	4.12354	4.1879	4.21169	4.06942	4.09924	4.15453	4.16872	4.17596	4.23679	4.20492	4.13186	4.24294	4.21651	4.16065	4.22537	15.6547	16.0034	16.8107	17.0575	17.0513	17.8006	17.537	16.5231	18.0562	17.5144	16.9584	17.7931	84079	chr19	33087907	33166102	4453	-	NM_032139	protein_coding	DKFZp434L0718|FLJ00040|VARP	P5327	ankyrin repeat domain 27	ANKRD27
794	ANKRD28	1.07007	1.02891	0.961536	0.0324524	0.245145	0.227595	5.03493	5.13264	5.07605	5.07194	5.02315	5.0407	5.00304	5.18808	5.10609	5.05473	5.17755	5.00562	5.13954	5.09384	5.06191	32.3645	31.2547	31.9189	31.2009	35.4063	33.3414	32.4141	35.1738	31.3402	34.1014	33.2944	32.5653	23243	chr3	15708744	15901053	6620	-	NM_001195099	protein_coding	KIAA0379|PITK	P28327	ankyrin repeat domain 28	ANKRD28
795	ANKRD29	0.997385	0.949469	0.951959	0.973795	0.275099	0.568432	1.39251	1.38874	1.31771	1.30105	1.36509	1.46919	1.42908	1.27974	1.42472	1.16642	1.64009	1.43516	1.30003	1.33715	1.18764	1.45083	1.56217	1.76885	1.7001	1.42573	1.67944	1.25254	2.11589	1.716	1.4554	1.5336	1.28521	147463	chr18	21178890	21242849	3361	-	NM_173505	protein_coding	FLJ25053	P33738	ankyrin repeat domain 29	ANKRD29
796	ANKRD30A	0.999998	1.0079	1.00791	0.284072	0.134463	0.134385	3.94156e-06	1.16487e-06	0.0113618	7.89522e-06	7.87099e-06	0	0	1.33911e-06	2.85546e-06	0	4.64911e-07	0	0.0234055	0.0218637	0	0	0	0	0	0	0	0	0	0	0.0162065	0.0154113	0	91074	chr10	37414785	37521495	4405	+	NM_052997	protein_coding	NY-BR-1	P859	ankyrin repeat domain 30A	ANKRD30A
797	ANKRD30B	0.99951	0.982704	0.983185	0.9843	0.589073	0.673716	0.193201	0.192495	0.16803	0.200072	0.199208	0.200881	0.172446	0.124802	0.264128	0.232312	0.144004	0.107051	0.168993	0.101289	0.286956	0.147008	0.14633	0.149422	0.127785	0.0901342	0.200158	0.175976	0.104883	0.0780219	0.123446	0.0733439	0.221378	374860	chr18	14748239	14852737	4617	+	NM_001145029	protein_coding	NY-BR-1.1	P2497	ankyrin repeat domain 30B	ANKRD30B
798	ANKRD30BL	1.01836	1.14161	1.12102	0.637627	0.0695562	0.0849386	0.292987	0.319239	0.484055	0.364915	0.219444	0.371523	0.207753	0.318178	0.398756	0.278756	0.277883	0.357969	0.353777	0.615377	0.588033	0.284763	0.162026	0.293757	0.156015	0.246279	0.317207	0.214855	0.212262	0.2841	0.276336	0.534185	0.505678	554226	chr2	132905164	133015542	2168	-	NR_027019	misc_RNA	ANKRD30BP3|NCRNA00164	.	ankyrin repeat domain 30B-like	ANKRD30BL
799	ANKRD30BP2	1.20197	1.11958	0.931454	0.0909589	0.0556961	0.422108	0.407614	0.67301	0.570567	0.524955	0.426202	0.231206	0.432493	0.406951	0.935871	0.672398	0.627551	0.674696	0.553767	0.527331	0.521045	0.434464	0.339807	0.173851	0.351577	0.325236	0.910658	0.597137	0.544647	0.600555	0.465514	0.443579	0.43764	149992	chr21	14410487	14490571	3418	+	NR_026916	misc_RNA	C21orf99|CT85|CTSP-1|CTSP1	.	ankyrin repeat domain 30B pseudogene 2	ANKRD30BP2
800	ANKRD30BP3	0.999996	1.01527	1.01528	0.284072	0.356071	0.355963	7.56811e-06	2.23665e-06	0.0218752	1.51594e-05	1.51129e-05	0	0	2.57119e-06	5.48272e-06	0	8.92667e-07	0	0.0855785	0	0	0	0	0	0	0	0	0	0	0	0.0607182	0	0	338579	chr10	45650110	45681489	1314	+	NR_033891	misc_RNA	.	.	ankyrin repeat domain 30B pseudogene 3	ANKRD30BP3
801	ANKRD31	0.992091	0.98844	0.99632	0.198409	0.0478558	0.493747	0.021028	0.00957211	0.00425279	0.0125663	0.0248163	0.0124784	0.0341362	0.0244477	0.0136931	0	1.42027e-06	0	0.0169364	0	0	0.00856059	0.0170417	0.00868923	0.0241436	0.0170383	0.00946408	0	0	0	0.0116861	0	0	256006	chr5	74364122	74532703	6036	-	NM_001164443	protein_coding	FLJ40191	P1451	ankyrin repeat domain 31	ANKRD31
802	ANKRD32	0.976445	0.929688	0.952115	0.248786	0.0638136	0.142057	2.82182	2.78743	2.71664	2.82027	2.87293	2.75846	2.83328	2.78845	2.81372	2.75303	2.79385	2.66148	2.7564	2.80827	2.63349	6.01258	6.27396	5.76735	6.15289	5.90044	6.01278	5.77332	5.93187	5.36506	5.73151	6.03058	5.23275	.	chr5	93954391	94031573	3813	+	NM_032290	.	BRCTD1|BRCTx|DKFZp564C0469|DKFZp761C121	P17873	.	ANKRD32
803	ANKRD33	1	1	1	1	1	1	0	0	0	0	0	0	0	0	0	0	0	0	0	0	0	0	0	0	0	0	0	0	0	0	0	0	0	341405	chr12	52281793	52285505	1942	+	NM_001304460	protein_coding	C12orf7|DKFZp686O1689	P18799	ankyrin repeat domain 33	ANKRD33
804	ANKRD33B	0.975888	1.0004	1.02512	0.32017	0.989611	0.465193	3.30971	3.2745	3.31029	3.34072	3.27789	3.2713	3.34725	3.32215	3.30573	3.20703	3.26032	3.20003	3.30876	3.35651	3.36978	9.05543	8.6264	8.65609	9.21595	8.98883	8.86146	8.2809	8.57765	8.24773	8.87011	9.28245	9.38338	651746	chr5	10564435	10657928	9333	+	NM_001164440	protein_coding	.	P17558	ankyrin repeat domain 33B	ANKRD33B
805	ANKRD34A	0.976391	0.962413	0.985684	0.590849	0.184575	0.73198	0.46162	0.42715	0.406348	0.374074	0.512433	0.472348	0.483904	0.480179	0.296196	0.380853	0.539401	0.44469	0.357405	0.381247	0.440099	0.292742	0.422496	0.387413	0.400481	0.39427	0.22687	0.304282	0.453127	0.364013	0.279453	0.304193	0.358863	284615	chr1	145470508	145475647	3612	+	NM_001039888	protein_coding	ANKRD34|DKFZp761F202	P9586	ankyrin repeat domain 34A	ANKRD34A
806	ANKRD34B	0.996606	1.00089	1.0043	0.355789	0.875611	0.355903	0.00490542	1.13218e-06	0.00619307	0.0195149	7.6501e-06	0	0	1.30152e-06	2.77533e-06	0	4.51863e-07	0	4.02029e-06	0.0246104	0	0.013371	0	0	0	0	0	0	0	0	0	0.0173593	0	340120	chr5	79852574	79866304	3935	-	NM_001004441	protein_coding	DP58	P22489	ankyrin repeat domain 34B	ANKRD34B
807	ANKRD34C	0.999999	1.00329	1.00329	0.284073	0.356071	0.355963	1.62729e-06	4.8092e-07	0.00474483	3.25957e-06	3.24957e-06	0	0	5.52854e-07	1.17889e-06	0	1.9194e-07	0	0.0188864	0	0	0	0	0	0	0	0	0	0	0	0.0130522	0	0	390616	chr15	79575146	79590581	5424	+	NM_001146341	protein_coding	FLJ33346|FLJ45093	P5584	ankyrin repeat domain 34C	ANKRD34C
808	ANKRD34C-AS1	1	1	1	1	1	1	0	0	0	0	0	0	0	0	0	0	0	0	0	0	0	0	0	0	0	0	0	0	0	0	0	0	0	729911	chr15	79484049	79576287	693	-	NR_038997	lncRNA	.	.	ANKRD34C antisense RNA 1	ANKRD34C-AS1
809	ANKRD35	1.0282	1.02611	0.99797	0.102966	0.0814561	0.911552	0.0121536	0.0522728	0.0493409	8.00685e-05	7.98228e-05	0.0251544	0.0230988	0.0247528	0.106807	0.0504219	0.0255582	0.0665154	0.0668356	0.0629055	0	0	0	0.0175931	0.0163108	0.017246	0.0765026	0.0359373	0.0178524	0.0477435	0.0470598	0.0449085	0	148741	chr1	145549209	145568526	3378	+	NM_001280799	protein_coding	FLJ25124|MGC126667|MGC126669	P24471	ankyrin repeat domain 35	ANKRD35
810	ANKRD36	1.07273	1.06159	0.989613	0.151203	0.22956	0.778679	1.54852	1.64981	1.63475	1.67449	1.47849	1.58344	1.44638	1.61322	1.7464	1.6015	1.63346	1.56566	1.72866	1.578	1.66058	2.17365	1.77017	1.99705	1.7335	2.05631	2.34826	2.0462	2.10151	1.9744	2.30423	1.99467	2.17241	375248	chr2	97779233	97930257	6268	+	NM_001164315	protein_coding	FLJ33607|KIAA1641|MGC167812|UNQ2430	P7124	ankyrin repeat domain 36	ANKRD36
811	ANKRD36B	1.08679	1.08892	1.00196	0.132162	0.00632554	0.966378	1.16613	1.2862	1.28902	1.17862	1.147	1.10889	1.22738	1.16307	1.45038	1.24446	1.27139	1.25962	1.33756	1.27835	1.27936	1.25201	1.20322	1.15693	1.34754	1.23739	1.72782	1.37726	1.41321	1.4044	1.52051	1.43207	1.43474	57730	chr2	98121261	98206428	5986	-	NM_025190	protein_coding	FLJ21281|FLJ90089|KIAA1641|MGC149864|MGC149865|MGC167812	P12229	ankyrin repeat domain 36B	ANKRD36B
812	ANKRD36BP1	1.02285	1.07755	1.05347	0.72884	0.20298	0.415228	3.34589	3.37849	3.45364	3.48274	3.21065	3.33443	3.34283	3.40706	3.42893	3.16157	3.49487	3.30614	3.53796	3.51452	3.44481	10.0958	8.18561	9.08798	9.18562	9.59425	9.74049	7.99438	10.2686	8.95383	10.5703	10.4725	9.93818	84832	chr1	168214819	168216668	1850	-	NR_026844	misc_RNA	ANKRD26L1|ANKRD36BL1|MGC12538	.	ankyrin repeat domain 36B pseudogene 1	ANKRD36BP1
813	ANKRD36BP2	0.999997	1.01058	1.01059	0.284072	0.356019	0.355909	5.31685e-06	1.57132e-06	0.015196	1.065e-05	1.06173e-05	0	0	1.80635e-06	3.85179e-06	0	6.27128e-07	0	5.57964e-06	0.0598412	0	0	0	0	0	0	0	0	0	0	0	0.0426525	0	645784	chr2	89065419	89106109	1730	+	NR_015424	misc_RNA	.	.	ankyrin repeat domain 36B pseudogene 2	ANKRD36BP2
814	ANKRD36C	0.895917	0.870487	0.971616	0.000987351	0.00473925	0.480157	2.37689	2.21832	2.17678	2.38684	2.36012	2.38801	2.37239	2.16634	2.28998	2.19041	2.22355	2.05891	2.26969	2.23944	2.12918	4.19576	4.10036	4.2348	4.19544	3.48362	3.87868	3.58474	3.66855	3.19056	3.80526	3.73875	3.39273	400986	chr2	96515296	96658068	8072	-	NM_001310154	protein_coding	.	P34683	ankyrin repeat domain 36C	ANKRD36C
815	ANKRD37	0.942989	0.720905	0.764489	0.493933	0.0051356	0.0244151	1.29096	1.20627	0.818838	1.47229	1.23938	1.14051	1.29126	0.92661	1.29122	1.3747	1.19429	0.890699	0.547765	0.85232	0.952068	1.76149	1.34968	1.20473	1.45342	0.89926	1.44311	1.60126	1.28767	0.86137	0.458382	0.809889	0.940212	353322	chr4	186317840	186321390	934	+	NM_181726	protein_coding	Lrp2bp|MGC111507	P14322	ankyrin repeat domain 37	ANKRD37
816	ANKRD39	1.02201	0.961938	0.94122	0.812211	0.566675	0.509831	4.04552	4.07693	3.98953	3.90768	4.07728	3.96586	4.21233	4.28711	4.17569	4.00899	3.78765	3.82838	4.09247	4.0825	3.93839	13.8885	15.7494	14.6274	17.6095	18.498	17.0218	15.1833	12.8035	13.3001	15.9896	16.0105	14.4043	51239	chr2	97513724	97523756	898	-	NM_016466	protein_coding	MGC41816	P17925	ankyrin repeat domain 39	ANKRD39
817	ANKRD40	1.00041	1.00125	1.00084	0.97989	0.95751	0.974698	4.69642	4.69701	4.69822	4.69466	4.72034	4.66987	4.70036	4.63839	4.70124	4.72476	4.72198	4.62478	4.72048	4.76797	4.67573	24.6888	25.1515	24.4575	25.105	23.8714	24.9391	25.5808	25.3786	23.8358	25.2533	26.359	24.6817	91369	chr17	48770551	48785270	4169	-	NM_052855	protein_coding	DKFZp451K241|MGC15396	P16602	ankyrin repeat domain 40	ANKRD40
818	ANKRD42	0.899149	0.877401	0.975813	0.0631898	0.0159568	0.600022	2.74461	2.59124	2.55592	2.84136	2.77891	2.64253	2.70791	2.72936	2.59432	2.48927	2.5408	2.65537	2.5342	2.53632	2.49261	6.11814	5.81622	5.2448	5.55709	5.62378	5.02346	4.64172	4.81663	5.33667	4.77069	4.82286	4.65248	338699	chr11	82904781	82967141	6894	+	NR_125355	protein_coding	FLJ37874|SARP	.	ankyrin repeat domain 42	ANKRD42
819	ANKRD44	0.969242	0.929352	0.958844	0.549751	0.345729	0.61251	1.42179	1.37672	1.31609	1.51878	1.35813	1.35298	1.45065	1.45236	1.27341	1.49643	1.2701	1.16217	1.28787	1.20068	1.57604	1.8503	1.54979	1.55457	1.74077	1.73407	1.41259	1.83129	1.41101	1.24796	1.43476	1.30499	1.99095	91526	chr2	197851386	198175521	6564	-	NM_001195144	protein_coding	FLJ11570|MGC21968|MGC70444|PP6-ARS-B	P32905	ankyrin repeat domain 44	ANKRD44
820	ANKRD44-IT1	1.00441	0.973136	0.968863	0.91827	0.35556	0.355949	0.0392944	0.0456433	7.80987e-06	5.96269e-05	5.9444e-05	0	0.15103	1.01134e-05	0.174488	0	3.51117e-06	0	3.12392e-05	0	0	0	0	0	0.11096	0	0.128096	0	0	0	0	0	0	101927547	chr2	198115582	198167243	1069	-	NR_046837	lncRNA	.	.	ANKRD44 intronic transcript 1	ANKRD44-IT1
821	ANKRD45	0.989813	0.996267	1.00652	0.133849	0.683918	0.355896	0.0147748	2.47248e-06	0.00937986	0.029339	1.67064e-05	0.0294444	0	2.8423e-06	6.06082e-06	0	9.86789e-07	0	8.77959e-06	0.0371504	0	0.0201999	0	0.0206234	0	0	0	0	0	0	0	0.0262994	0	339416	chr1	173577475	173639001	2671	-	NM_198493	protein_coding	CT117|FLJ45235|MGC161631|MGC161633|RP3-436N22.4	P28961	ankyrin repeat domain 45	ANKRD45
822	ANKRD46	0.961655	0.882008	0.917178	0.0234921	0.00305718	0.0116662	2.34579	2.28938	2.16466	2.37358	2.35858	2.2958	2.35401	2.29417	2.27374	2.28196	2.30743	2.20217	2.13185	2.07999	2.23934	4.14804	4.09481	3.91067	4.12978	3.89914	3.82401	3.88483	3.94806	3.6275	3.36699	3.24338	3.74098	157567	chr8	101521980	101572014	4509	-	NM_001270379	protein_coding	.	P26193	ankyrin repeat domain 46	ANKRD46
823	ANKRD49	0.971666	0.892915	0.918952	0.495347	0.0324313	0.102422	3.13866	3.09719	2.97525	3.2107	3.09062	3.19065	3.0568	3.20719	3.09257	2.99772	3.08355	2.9975	3.07	2.97983	2.84457	8.19118	7.45607	8.13109	7.35284	8.22418	7.50737	7.02672	7.47326	7.03547	7.36516	6.91989	6.21611	54851	chr11	94227153	94232744	1905	+	NM_017704	protein_coding	FGIF|FLJ20189|FLJ20441|GBIF	P33233	ankyrin repeat domain 49	ANKRD49
824	ANKRD50	1.01339	0.975207	0.962319	0.612969	0.595443	0.427875	3.76577	3.78496	3.72955	3.80792	3.73823	3.8045	3.70994	3.80563	3.77904	3.71318	3.83905	3.60459	3.86163	3.7906	3.64621	12.898	12.2418	12.9737	12.1381	12.965	12.6896	12.1825	13.3045	11.2438	13.4787	12.894	11.5796	57182	chr4	125585204	125633887	12260	-	NM_020337	protein_coding	KIAA1223	P34930	ankyrin repeat domain 50	ANKRD50
825	ANKRD52	1.00431	1.0283	1.02389	0.819321	0.443178	0.45553	4.71994	4.72614	4.76021	4.70861	4.77848	4.65731	4.73272	4.71606	4.74075	4.73357	4.71401	4.67745	4.86455	4.71143	4.78026	24.9377	26.2271	24.2368	25.6974	25.2472	25.6593	25.7442	25.2333	24.759	28.0117	25.3087	26.6106	283373	chr12	56631591	56652143	8656	-	NM_173595	protein_coding	ANKRD33|FLJ34236	P20943	ankyrin repeat domain 52	ANKRD52
826	ANKRD53	0.981998	0.988479	1.0066	0.613232	0.605362	0.83371	0.105679	0.0794706	0.0889621	0.0792869	0.0402051	0.155795	0.144324	0.188821	7.06635e-05	0.0809808	0.0411078	0.106284	0.106047	0.0476561	0.0950561	0.0556391	0.0276943	0.114052	0.105854	0.139578	0	0.0583079	0.0288696	0.0773019	0.0757357	0.0339128	0.0686838	79998	chr2	71205575	71212629	2120	+	NM_001115116	protein_coding	FLJ12056|FLJ36160	P28843	ankyrin repeat domain 53	ANKRD53
827	ANKRD54	0.934531	0.912543	0.976472	0.22654	0.135234	0.63071	3.46465	3.36696	3.33261	3.29631	3.50987	3.47475	3.56395	3.38543	3.46422	3.24576	3.364	3.44542	3.36586	3.20072	3.30746	8.74851	10.3071	10.1185	10.871	9.43654	10.0067	8.53412	9.2913	9.96107	9.26809	8.2317	8.94588	129138	chr22	38226862	38240353	2094	-	NM_138797	protein_coding	LIAR	P12149	ankyrin repeat domain 54	ANKRD54
828	ANKRD55	1.00605	1.00742	1.00137	0.35621	0.356101	0.890532	6.74773e-06	0.00870396	0.0106747	1.35162e-05	1.34747e-05	0	0	2.29247e-06	0.0345021	0	7.95901e-07	0.0422261	7.08124e-06	0	0	0	0	0	0	0	0.0240635	0	0	0.030071	0	0	0	79722	chr5	55395507	55529186	2500	-	NM_024669	protein_coding	FLJ11795|MGC126013|MGC126014	P29465	ankyrin repeat domain 55	ANKRD55
829	ANKRD6	1.02385	1.06246	1.03772	0.623838	0.246023	0.246826	0.947313	0.981312	1.03473	0.866203	0.904076	0.885592	1.11862	0.978436	0.935797	0.955516	1.05276	1.0712	1.02649	0.944305	1.09248	0.814777	0.863044	0.847627	1.17638	0.968831	0.909857	0.94497	1.07394	1.10895	1.03227	0.92875	1.13816	22881	chr6	90142897	90343553	6180	+	NM_001242809	protein_coding	.	P33953	ankyrin repeat domain 6	ANKRD6
830	ANKRD60	1	1	1	1	1	1	0	0	0	0	0	0	0	0	0	0	0	0	0	0	0	0	0	0	0	0	0	0	0	0	0	0	0	140731	chr20	56791182	56803709	3407	-	NM_001304369	protein_coding	C20orf86|bA196N14.3	P23795	ankyrin repeat domain 60	ANKRD60
831	ANKRD61	0.923234	0.854107	0.925125	0.415704	0.308841	0.564483	1.01841	0.903174	0.790894	0.898095	1.3052	0.812734	1.00819	0.765665	0.82728	1.04979	0.953071	1.20218	0.355217	0.664656	0.811754	0.855683	1.46061	0.756631	1.0158	0.698947	0.771628	1.07607	0.935502	1.30903	0.276784	0.588577	0.759781	100310846	chr7	6071007	6076183	1423	+	NM_001271700	protein_coding	.	P18182	ankyrin repeat domain 61	ANKRD61
832	ANKRD62	0.997208	0.997208	1	0.355758	0.355752	0.917452	0.0040338	4.12623e-07	3.66299e-07	2.79667e-06	2.78808e-06	0.0160624	0	4.74341e-07	1.01147e-06	0	1.64682e-07	0	1.4652e-06	0	0	0	0	0.0111985	0	0	0	0	0	0	0	0	0	342850	chr18	12093848	12129748	4733	+	NM_001277333	protein_coding	DKFZp686E2239|DKFZp779B1634	P26453	ankyrin repeat domain 62	ANKRD62
833	ANKRD62P1-PARP4P3	1	1	1	1	1	1	0	0	0	0	0	0	0	0	0	0	0	0	0	0	0	0	0	0	0	0	0	0	0	0	0	0	0	23783	chr22	17134599	17156430	1538	-	NR_040115	misc_RNA	.	.	ANKRD62P1-PARP4P3 readthrough, transcribed pseudogene	ANKRD62P1-PARP4P3
834	ANKRD63	1.05678	1.0503	0.993871	0.363233	0.465441	0.928109	0.091414	0.171088	0.162219	0.21427	0.000306927	0	0.139241	0.280427	0.235855	0.152455	1.81301e-05	0	0.194146	0.0964318	0.33669	0.158386	0	0	0.102003	0.214205	0.176938	0.112379	0	0	0.143194	0.0696803	0.264248	100131244	chr15	40573645	40574787	1143	-	NM_001190479	protein_coding	.	P29228	ankyrin repeat domain 63	ANKRD63
835	ANKRD65	0.937689	0.948485	1.01151	0.282794	0.516585	0.857328	0.236167	0.143348	0.159864	0.106129	0.432388	0.193821	0.191368	0.189559	0.159247	0.072821	0.149222	0.0957073	0.000207258	0.133979	0.381481	0.075143	0.346622	0.143811	0.142712	0.140129	0.116156	0.0524096	0.108885	0.0695191	0	0.0980302	0.304252	441869	chr1	1353800	1356824	2382	-	NM_001145210	protein_coding	.	P13645	ankyrin repeat domain 65	ANKRD65
836	ANKRD66	1	1	1	1	1	1	0	0	0	0	0	0	0	0	0	0	0	0	0	0	0	0	0	0	0	0	0	0	0	0	0	0	0	100287718	chr6	46714654	46726954	1057	+	NM_001162435	protein_coding	.	P34163	ankyrin repeat domain 66	ANKRD66
837	ANKRD7	0.973365	0.924514	0.949812	0.757352	0.418727	0.39888	0.251206	0.212259	0.137973	0.0621082	0.176696	0.180669	0.539148	0.177304	0.132907	0.346734	0.182762	0.309066	0.000233166	0.0786847	0.145754	0.0430633	0.128641	0.133431	0.454844	0.130487	0.0959932	0.273332	0.134955	0.240831	0	0.0566039	0.107198	56311	chr7	117864712	117882784	1357	+	NM_019644	protein_coding	TSA806	P20763	ankyrin repeat domain 7	ANKRD7
838	ANKRD9	1.0559	1.15179	1.09081	0.262326	0.0113526	0.0196484	3.74984	3.82831	3.95372	3.79387	3.69354	3.87421	3.62523	3.80045	3.85774	3.74873	3.90172	3.96031	3.97313	3.99217	3.88707	12.7612	11.8355	13.6655	11.3904	12.9146	13.4569	12.5122	13.9395	14.6639	14.642	14.9766	13.864	122416	chr14	102973198	102976128	1626	-	NM_152326	protein_coding	MGC21990	P21316	ankyrin repeat domain 9	ANKRD9
839	ANKS1A	0.962046	1.00935	1.04917	0.144103	0.853503	0.355587	3.1547	3.09888	3.16813	3.1872	3.17342	3.07624	3.17916	3.05175	3.07407	3.13262	3.13525	3.0842	3.34702	3.08758	3.13725	8.04125	7.95536	7.43494	8.09201	7.28155	7.39853	7.81317	7.7824	7.53328	9.13714	7.534	7.83776	23294	chr6	34857038	35059190	6351	+	NM_015245	protein_coding	ANKS1|KIAA0229|MGC42354	P34117	ankyrin repeat and sterile alpha motif domain containing 1A	ANKS1A
840	ANKS1B	1.19031	1.00804	0.846871	0.0714447	0.893879	0.0422984	1.36734	1.61868	1.37889	1.54565	1.4093	1.31621	1.17262	1.80684	1.66143	1.56455	1.4135	1.35656	1.32892	1.45836	1.36842	1.90332	1.64135	1.49029	1.26073	2.49558	2.15709	1.96851	1.66295	1.57254	1.50477	1.75592	1.59054	56899	chr12	99128569	100378432	7326	-	NM_152788	protein_coding	AIDA|AIDA-1|ANKS2|EB-1|EB1|MGC26087|cajalin-2	P6829	ankyrin repeat and sterile alpha motif domain containing 1B	ANKS1B
841	ANKS3	1.13119	1.16106	1.0264	0.0346938	0.0577411	0.730888	2.63655	2.81439	2.85199	2.6529	2.62594	2.60156	2.66498	2.97141	2.73858	2.82473	2.70818	2.96768	2.63729	2.76992	3.00266	5.2432	5.12751	5.06998	5.36596	6.8338	5.65666	6.11797	5.53215	6.86751	5.19763	5.84632	7.04795	124401	chr16	4746511	4784378	3272	-	NM_133450	protein_coding	FLJ32345|FLJ32767|KIAA1977	P4937	ankyrin repeat and sterile alpha motif domain containing 3	ANKS3
842	ANKS4B	0.986484	0.981945	0.995399	0.174389	0.0529707	0.355904	0.0262883	0.00665646	2.9949e-06	0.0530201	2.27955e-05	0.026891	0.0247316	0.0264341	8.26985e-06	0	1.34645e-06	0	1.19795e-05	0	0	0.0368964	0	0.0188184	0.0174479	0.0184367	0	0	0	0	0	0	0	257629	chr16	21245016	21263750	2906	+	NM_145865	protein_coding	FLJ38819|HARP|MGC133380|MGC133381	P15382	ankyrin repeat and sterile alpha motif domain containing 4B	ANKS4B
843	ANKS6	0.962305	0.954608	0.992002	0.0891017	0.2904	0.841297	2.99168	2.93625	2.92466	3.03199	3.01197	2.92354	2.99693	2.90777	2.96807	2.9488	2.91957	2.77041	3.03385	2.93696	2.94503	7.12039	7.00847	6.58775	7.01266	6.4952	6.80421	6.75823	6.56291	5.86551	7.15898	6.68729	6.73481	203286	chr9	101494291	101558794	7147	-	NM_173551	protein_coding	ANKRD14|DKFZp686D24121|DKFZp781I0117|MGC70366|SAMD6	P31617	ankyrin repeat and sterile alpha motif domain containing 6	ANKS6
844	ANKUB1	1	1	1	1	1	1	0	0	0	0	0	0	0	0	0	0	0	0	0	0	0	0	0	0	0	0	0	0	0	0	0	0	0	389161	chr3	149478890	149510610	2473	-	NM_001144960	protein_coding	.	P18506	ankyrin repeat and ubiquitin domain containing 1	ANKUB1
845	ANKZF1	0.999043	1.02659	1.02758	0.975877	0.627905	0.616808	3.00729	3.0059	3.04515	3.01708	2.91681	3.06119	3.03005	2.95912	2.99998	3.09332	2.96721	3.09827	2.8601	3.02318	3.18001	7.0357	6.49534	7.3474	7.19907	6.76665	6.97853	7.57534	6.81682	7.61514	6.23187	7.16083	8.10209	55139	chr2	220094479	220101391	2650	+	NM_018089	protein_coding	FLJ10415|FLJ13144|ZNF744	P15010	ankyrin repeat and zinc finger domain containing 1	ANKZF1
846	ANLN	1.02589	1.01275	0.987187	0.267539	0.496354	0.483447	6.94005	6.97693	6.95832	6.94393	6.88946	6.99412	6.93074	6.9634	6.93078	6.9804	7.03129	6.92015	6.96272	6.98145	6.96825	121.107	116.584	126.493	121.515	123.619	120.64	125.956	129.743	120.931	123.196	125.908	124.833	54443	chr7	36429412	36493401	5024	+	NM_001284302	protein_coding	DKFZp779A055|Scraps|scra	P34291	anillin actin binding protein	ANLN
847	ANO1	0.995294	0.996349	1.00106	0.773799	0.849407	0.938649	0.0933448	0.0865398	0.0880684	0.106898	0.0314917	0.107187	0.125993	0.0623318	0.0844379	0.105386	0.0936585	0.0418504	0.0835647	0.116077	0.109607	0.0758799	0.0215801	0.0771389	0.0918443	0.0440272	0.0599532	0.0764539	0.0670168	0.0299108	0.0591707	0.0843514	0.0795629	55107	chr11	69924408	70035652	4098	+	NM_018043	protein_coding	DOG1|FLJ10261|ORAOV2|TAOS2|TMEM16A	P21960	anoctamin 1	ANO1
848	ANO1-AS2	1	1	1	1	1	1	0	0	0	0	0	0	0	0	0	0	0	0	0	0	0	0	0	0	0	0	0	0	0	0	0	0	0	100009613	chr11	69918540	69921454	804	-	NR_103835	lncRNA	.	.	ANO1 antisense RNA 2 (head to head)	ANO1-AS2
849	ANO10	1.01759	1.01275	0.995236	0.556089	0.717321	0.863523	4.38746	4.41262	4.40573	4.4558	4.30624	4.34819	4.43442	4.41324	4.3551	4.44665	4.43379	4.3882	4.43137	4.47688	4.32197	20.7717	18.6253	19.3694	20.7094	20.2781	19.4061	20.9191	20.6024	20.0774	20.4868	21.3591	19.0969	55129	chr3	43407818	43663560	2854	-	NM_001204834	protein_coding	FLJ10375|MGC47890|TMEM16K	P9544	anoctamin 10	ANO10
850	ANO2	1.0674	1.03493	0.969585	0.101386	0.584647	0.589879	0.374444	0.468543	0.423982	0.333041	0.471909	0.284114	0.401727	0.439576	0.513604	0.513147	0.404758	0.370525	0.234273	0.58281	0.485017	0.256641	0.383216	0.217697	0.32282	0.355598	0.426183	0.429753	0.323666	0.29548	0.175012	0.500003	0.401887	57101	chr12	5671817	6055398	3784	-	NM_001278596	protein_coding	C12orf3|DKFZp434P102|TMEM16B	P740	anoctamin 2	ANO2
851	ANO3	1	1	1	1	1	1	0	0	0	0	0	0	0	0	0	0	0	0	0	0	0	0	0	0	0	0	0	0	0	0	0	0	0	63982	chr11	26353678	26684836	5936	+	NM_031418	protein_coding	C11orf25|TMEM16C	P29961	anoctamin 3	ANO3
852	ANO4	1	1	1	1	1	1	0	0	0	0	0	0	0	0	0	0	0	0	0	0	0	0	0	0	0	0	0	0	0	0	0	0	0	121601	chr12	101188374	101522419	4225	+	NM_178826	protein_coding	FLJ34221|FLJ34272|FLJ35277|MGC130026|TMEM16D	P6789	anoctamin 4	ANO4
853	ANO5	0.992772	0.991265	0.998482	0.0609826	0.0386252	0.682852	0.0164358	0.00596989	0.00377888	0.0113598	0.0224457	0.0112747	0.0206263	3.07761e-06	0.0123759	0	0.0114513	0.0150471	9.50645e-06	0	0	0.00773479	0.0153976	0.00784778	0.0145358	0	0.00854947	0	0.00795889	0.0106576	0	0	0	203859	chr11	22214722	22304913	6709	+	NM_001142649	protein_coding	GDD1|LGMD2L|TMEM16E	P4866	anoctamin 5	ANO5
854	ANO6	0.975275	0.981609	1.0065	0.551728	0.744169	0.926513	3.79155	3.75544	3.76478	3.7857	3.78972	3.81893	3.77144	3.75244	3.66345	3.68364	3.90909	3.51947	3.89363	3.79221	3.82654	12.685	12.7236	13.1142	12.7099	12.4594	11.6348	11.9158	14.0162	10.5435	13.8036	12.9096	13.2528	196527	chr12	45609770	45834187	7153	+	NM_001142679	protein_coding	MGC104751|TMEM16F	P1322	anoctamin 6	ANO6
855	ANO7	0.961226	0.994218	1.03432	0.674575	0.921793	0.660485	0.613027	0.555975	0.604662	0.657562	0.788554	0.418134	0.562577	0.355554	0.817221	0.436992	0.570834	0.55592	0.671349	0.593609	0.595318	0.572161	0.721407	0.336248	0.479335	0.278863	0.759797	0.356455	0.485099	0.47399	0.589768	0.511583	0.513762	50636	chr2	242127924	242164791	4588	+	NM_001001666	protein_coding	D-TMPP|DTMPP|IPCA-5|IPCA5|NGEP|PCANAP5|PCANAP5L|TMEM16G	P32765	anoctamin 7	ANO7
856	ANO8	1.03361	1.0547	1.0204	0.218633	0.188122	0.555493	2.99965	3.04735	3.07649	3.07544	2.94713	3.01004	2.96249	3.09923	3.01756	3.05219	3.01887	3.06732	3.1133	2.95911	3.15867	7.3677	6.65454	7.05665	6.82449	7.55897	7.07626	7.33483	7.10179	7.4329	7.62055	6.80685	7.96883	57719	chr19	17434032	17445638	4152	-	NM_020959	protein_coding	KIAA1623|TMEM16H	P28528	anoctamin 8	ANO8
857	ANO9	1.02849	1.01805	0.989849	0.134174	0.0244222	0.573254	2.32755e-05	0.0405458	0.0258263	4.66221e-05	4.64791e-05	0	0	0.0787192	1.68619e-05	0	0.0812301	0.0362971	2.44258e-05	0.0343109	0.0323654	0	0	0	0	0.0559553	0	0	0.0578754	0.0258292	0	0.0242812	0.0229233	338440	chr11	417930	442011	2875	-	NM_001012302	protein_coding	PIG5|TMEM16J|TP53I5	P9337	anoctamin 9	ANO9
858	ANOS1	0.935959	0.97083	1.03726	0.229331	0.585421	0.589554	2.58992	2.49444	2.54721	2.6529	2.61679	2.59292	2.49218	2.61577	2.45325	2.323	2.56819	2.43735	2.72764	2.47593	2.53026	5.24617	5.09164	5.03372	4.64662	5.12233	4.46241	4.02764	4.92821	4.4483	5.60018	4.58382	4.80109	3730	chrX	8496915	8700227	6314	-	NM_000216	protein_coding	.	P24272	anosmin 1	ANOS1
859	ANP32A	0.980182	0.968289	0.987867	0.719637	0.66809	0.859188	5.6502	5.62132	5.60371	5.46093	5.70903	5.74456	5.6699	5.64598	5.56167	5.73522	5.53378	5.69697	5.33171	5.70527	5.64933	42.6829	50.8886	52.6203	50.1222	49.0044	46.0914	52.5519	45.3046	51.2217	39.0963	51.395	49.4351	8125	chr15	69070875	69113261	2466	-	NM_006305	protein_coding	C15orf1|I1PP2A|LANP|MAPM|MGC119787|MGC150373|PHAP1|PHAPI|PP32	P20520	acidic nuclear phosphoprotein 32 family member A	ANP32A
860	ANP32A-IT1	0.936781	1.03753	1.10755	0.322986	0.225539	0.152298	0.746961	0.652745	0.800114	0.754433	0.751748	0.687847	0.791888	0.422807	0.841727	0.710861	0.603234	0.812583	0.864927	0.811332	0.707105	0.680638	0.677536	0.610953	0.734689	0.33978	0.78972	0.64078	0.518795	0.761847	0.817594	0.758309	0.636166	80035	chr15	69096160	69099440	3281	-	NR_026808	lncRNA	.	.	ANP32A intronic transcript 1	ANP32A-IT1
861	ANP32AP1	0.938136	0.915274	0.975631	0.507192	0.355839	0.355823	0.127739	0.0356077	1.52807e-05	0.000116664	0.454428	0	0	1.97877e-05	4.21944e-05	0.137381	6.86991e-06	0	6.11218e-05	0	0	0	0.367645	0	0	0	0	0.100659	0	0	0	0	0	723972	chr15	35529527	35530264	738	+	NR_003144	misc_RNA	.	.	acidic nuclear phosphoprotein 32 family member A pseudogene 1	ANP32AP1
862	ANP32B	1.02745	1.00385	0.97703	0.544388	0.958337	0.719436	8.09218	8.13125	8.09772	7.9231	8.16294	8.16307	8.10648	8.12963	8.06628	8.19931	8.1267	8.22377	7.83013	8.19866	8.10568	239.699	283.249	285.664	275.775	278.674	266.232	294.521	278.363	299.986	225.573	294.061	275.824	10541	chr9	100745489	100778224	1616	+	NM_006401	protein_coding	APRIL|PHAPI2|SSP29	P14765	acidic nuclear phosphoprotein 32 family member B	ANP32B
863	ANP32C	1	1	1	1	1	1	0	0	0	0	0	0	0	0	0	0	0	0	0	0	0	0	0	0	0	0	0	0	0	0	0	0	0	23520	chr4	165118159	165118863	705	-	NM_012403	protein_coding	PP32R1	P19926	acidic nuclear phosphoprotein 32 family member C	ANP32C
864	ANP32D	1	1	1	1	1	1	0	0	0	0	0	0	0	0	0	0	0	0	0	0	0	0	0	0	0	0	0	0	0	0	0	0	0	23519	chr12	48866448	48866843	396	+	NM_012404	protein_coding	PP32R2	P35076	acidic nuclear phosphoprotein 32 family member D	ANP32D
865	ANP32E	1.05204	0.995049	0.945829	0.253545	0.925874	0.272227	6.25503	6.32821	6.24787	6.13155	6.23689	6.35399	6.28856	6.29598	6.35051	6.41197	6.24926	6.32239	6.08519	6.34236	6.22742	68.5311	73.8032	80.8062	77.4989	77.4649	80.3596	84.6078	75.0335	79.5652	66.5983	80.4872	74.2974	81611	chr1	150190717	150208504	3550	-	NM_001280559	protein_coding	LANP-L|LANPL|MGC5350	P4777	acidic nuclear phosphoprotein 32 family member E	ANP32E
866	ANPEP	1.00366	1.00623	1.00256	0.53821	0.576906	0.81916	0.00531414	0.0105809	0.0142755	0.0211197	2.07396e-05	0	0	0.0207495	7.524e-06	0	0.0214124	0	0.0562736	0	0	0.0144743	0	0	0	0.0144407	0	0	0.0149364	0	0.039483	0	0	290	chr15	90328126	90358072	3650	-	NM_001150	protein_coding	APN|CD13|GP150|LAP1|P150|PEPN	P32945	alanyl aminopeptidase, membrane	ANPEP
867	ANTXR1	0.94197	0.989409	1.05036	0.073888	0.724572	0.173823	4.63038	4.54414	4.61502	4.61277	4.64828	4.57047	4.68743	4.60373	4.48488	4.49287	4.59096	4.52257	4.67117	4.65827	4.60338	23.2723	23.8785	22.7625	24.8707	23.2813	21.326	21.6354	23.0886	22.1367	24.3722	24.3555	23.4248	84168	chr2	69240276	69476459	7123	+	NM_053034	protein_coding	ATR|FLJ10601|FLJ11298|FLJ21776|TEM8	P28439	anthrax toxin receptor 1	ANTXR1
868	ANTXR2	0.846998	0.802529	0.947498	0.000966041	0.000913908	0.196661	5.77923	5.53966	5.46186	5.69649	5.78305	5.82796	5.80601	5.56224	5.48225	5.5064	5.60459	5.48243	5.33328	5.46129	5.56122	50.4389	53.6236	55.8112	55.1776	46.1844	43.5686	44.701	47.6341	44.0097	39.1404	43.246	46.4479	118429	chr4	80822771	80994626	8929	-	NM_001286780	protein_coding	CMG-2|CMG2|FLJ31074|ISH|JHF|MGC111533|MGC45856	P22434	anthrax toxin receptor 2	ANTXR2
869	ANTXRL	1	1	1	1	1	1	0	0	0	0	0	0	0	0	0	0	0	0	0	0	0	0	0	0	0	0	0	0	0	0	0	0	0	195977	chr10	47658233	47701443	2285	+	NM_001278688	protein_coding	.	P29914	anthrax toxin receptor-like	ANTXRL
870	ANTXRLP1	1	1	1	1	1	1	0	0	0	0	0	0	0	0	0	0	0	0	0	0	0	0	0	0	0	0	0	0	0	0	0	0	0	100996567	chr10	47590261	47640844	1165	-	NR_103827	misc_RNA	.	.	anthrax toxin receptor-like pseudogene 1	ANTXRLP1
871	ANXA1	1.0539	1.00516	0.953747	0.0854553	0.761118	0.110515	8.45813	8.53388	8.46556	8.43463	8.42429	8.4935	8.47895	8.51094	8.45692	8.55521	8.60813	8.50388	8.42457	8.46512	8.46757	342.137	339.695	359.448	357.305	363.282	349.336	377.207	389.026	364.489	341.104	353.918	354.751	301	chr9	75766647	75785310	1536	+	NM_000700	protein_coding	ANX1|LPC1	P24461	annexin A1	ANXA1
872	ANXA10	0.951775	0.936153	0.983587	0.356615	0.134306	0.725842	0.202799	0.131491	0.107616	0.312681	0.164599	0.220115	0.105709	5.44364e-05	0.123628	0.115843	0.273319	0.0772789	0.0769611	0.0731151	0.199096	0.23979	0.119381	0.164849	0.0766019	0	0.0890216	0.0843933	0.208465	0.0558042	0.054301	0.0524633	0.148978	11199	chr4	169013688	169108893	1447	+	NM_007193	protein_coding	ANX14	P4592	annexin A10	ANXA10
873	ANXA11	1.01037	1.03468	1.02406	0.73045	0.371526	0.514579	6.02824	6.04312	6.07742	5.99024	6.07961	5.96117	6.07811	6.09839	5.96762	6.06961	6.03355	6.15649	5.96971	6.05555	6.12095	62.0467	66.0803	61.3068	66.8429	67.4221	61.3934	66.5247	64.4743	70.8109	61.4003	65.7967	68.9377	311	chr10	81914880	81965433	3182	-	NM_145869	protein_coding	ANX11|CAP50	P7583	annexin A11	ANXA11
874	ANXA13	0.989985	1.0034	1.01355	0.355541	0.845736	0.355903	0.0145245	3.5071e-06	0.0194208	2.37702e-05	2.36973e-05	0.057195	0	4.03167e-06	8.59699e-06	0	1.39972e-06	0.0761502	1.24534e-05	0	0	0	0	0.0404481	0	0	0	0	0	0.054777	0	0	0	312	chr8	124693034	124749647	1593	-	NM_001003954	protein_coding	ANX13|ISA|MGC150460	P9491	annexin A13	ANXA13
875	ANXA2	1.07219	1.03717	0.967338	9.56288e-05	0.0456012	0.0737562	9.80369	9.90425	9.85634	9.79663	9.81601	9.80378	9.79824	9.89668	9.92348	9.9163	9.88015	9.91536	9.83958	9.83496	9.83382	880.993	892.944	892.877	893.137	950.891	967.189	970.543	940.909	971.251	911.258	916.261	916.133	302	chr15	60639350	60690185	1856	-	NM_004039	protein_coding	ANX2|ANX2L4|CAL1H|LIP2|LPC2|LPC2D|P36|PAP-IV	P22056	annexin A2	ANXA2
876	ANXA2P1	0.982676	0.979666	0.996937	0.604332	0.606923	0.927672	0.0906761	0.0654643	0.0610381	0.179092	0.0622698	0	0.115297	2.6023e-05	0.0688243	0.0644031	0.125856	0	0.162307	0	0.0755862	0.130767	0.043404	0	0.0837356	0	0.0485893	0.0461264	0.0910891	0	0.118386	0	0.0542689	303	chr4	154228621	154229963	1343	-	NR_001562	misc_RNA	ANX2L1|ANX2P1|LPC2A	.	annexin A2 pseudogene 1	ANXA2P1
877	ANXA2P2	1.24939	1.12989	0.904353	0.00782738	0.164775	0.155034	2.84628	3.16751	3.02247	2.75528	2.6708	2.9585	2.9769	3.21224	3.04055	3.23521	3.17426	3.21682	3.07129	2.87717	2.89774	5.6998	5.31817	6.7739	6.90282	8.25671	7.20623	8.46051	8.0233	8.35182	7.3731	6.37601	6.48625	304	chr9	33624223	33625532	1310	+	NR_003573	misc_RNA	ANX2L2|ANX2P2|LPC2B	.	annexin A2 pseudogene 2	ANXA2P2
878	ANXA2P3	1.01135	1.01498	1.00359	0.356137	0.356096	0.853238	1.3261e-05	0.0162976	0.0214689	2.65627e-05	2.64812e-05	0	0	4.5053e-06	9.60695e-06	0.0640989	1.56415e-06	0.0840098	1.39164e-05	0	0	0	0	0	0	0	0	0.045839	0	0.0605796	0	0	0	305	chr10	66585285	66586634	1350	+	NR_001446	misc_RNA	ANX2L3|ANX2P3|LIP2|LPC2C	.	annexin A2 pseudogene 3	ANXA2P3
879	ANXA2R	1.22411	1.16045	0.947991	0.0391135	0.0631324	0.249044	0.660752	0.952485	0.875431	0.463422	0.60183	0.615204	0.922503	0.995712	0.835502	0.877591	1.08744	0.883134	0.870598	0.844691	0.902688	0.373809	0.511832	0.53185	0.899367	0.992671	0.781863	0.84222	1.12445	0.850568	0.824523	0.799681	0.874128	389289	chr5	43039182	43040447	1266	-	NM_001014279	protein_coding	.	P33956	annexin A2 receptor	ANXA2R
880	ANXA3	1.01481	0.980902	0.966582	0.578797	0.410547	0.170353	6.45945	6.48067	6.43163	6.43012	6.41795	6.53074	6.45632	6.55234	6.43504	6.46701	6.46562	6.48096	6.41714	6.43058	6.39651	84.5219	83.805	91.4684	87.1792	92.7233	85.2675	87.9406	87.3355	88.9266	84.0891	85.6281	83.6612	306	chr4	79472742	79531605	1618	+	NM_005139	protein_coding	ANX3	P20582	annexin A3	ANXA3
881	ANXA4	1.0455	1.09251	1.04496	0.202413	0.0268652	0.0459532	3.43053	3.49473	3.55818	3.32468	3.47056	3.40232	3.51729	3.4434	3.51965	3.4908	3.52366	3.55244	3.54171	3.5296	3.60772	8.94056	10.0006	9.57408	10.4946	9.86426	10.4373	10.2982	10.4956	10.8056	10.5994	10.594	11.2456	307	chr2	69969127	70053596	2142	+	NM_001153	protein_coding	ANX4|DKFZp686H02120|MGC75105|PIG28|ZAP36	P21016	annexin A4	ANXA4
882	ANXA5	1.02816	0.968254	0.941731	0.182617	0.0867536	0.00189231	8.47934	8.51941	8.4328	8.50178	8.41795	8.51907	8.47655	8.4885	8.53215	8.55573	8.50029	8.44436	8.42855	8.42207	8.43613	358.488	338.201	365.895	356.711	357.66	368.089	377.344	360.936	349.718	342.05	343.485	347.083	308	chr4	122589152	122618147	1599	-	NM_001154	protein_coding	ANX5|ENX2|PP4	P19399	annexin A5	ANXA5
883	ANXA6	1.01053	1.01866	1.00804	0.73922	0.695335	0.860764	6.86233	6.87745	6.889	6.76397	6.89883	6.87703	6.90506	6.89424	6.83599	6.95008	6.82603	6.986	6.72752	6.87798	6.95107	106.784	117.353	116.554	119.352	117.786	112.904	123.314	112.404	126.621	104.511	117.125	123.342	309	chr5	150480267	150537443	3115	-	NM_001155	protein_coding	ANX6|CBP68	P15063	annexin A6	ANXA6
884	ANXA7	0.980592	0.972554	0.991803	0.523509	0.506074	0.866986	6.09828	6.07	6.05813	6.09024	6.05951	6.1154	6.12703	6.1358	5.95476	6.11132	6.07153	6.04448	5.8984	6.15068	6.12572	66.5744	65.1506	68.3369	69.1825	69.2194	60.8391	68.505	66.2207	65.4502	58.3892	70.3482	69.1697	310	chr10	75135189	75173841	2204	-	NM_001156	protein_coding	ANX7|SNX|SYNEXIN	P10160	annexin A7	ANXA7
885	ANXA8	1.03061	0.996221	0.966633	0.236481	0.87332	0.230212	0.0315636	0.0750621	0.0261018	0.0845072	9.32573e-05	0	0.0399623	0.124106	3.38326e-05	0.0866524	0.0866022	0	4.90091e-05	0	0.101642	0.0595156	0	0	0.0283381	0.0896541	0	0.0624446	0.0618178	0	0	0	0.0735452	653145	chr10	47157984	48271368	4333	-	NM_001271702	protein_coding	ANX8|FLJ53095	P30948	annexin A8	ANXA8
886	ANXA8L1	1.10296	1.19309	1.08172	0.182056	0.222091	0.539439	0.376517	0.517893	0.631219	0.456002	0.180325	0.528368	0.316894	0.367787	0.554106	0.495569	0.640567	0.546489	0.48024	1.03591	0.36691	0.367806	0.130777	0.442351	0.247274	0.289784	0.466651	0.412596	0.558654	0.464154	0.392849	1.05403	0.291664	728113	chr10	47746850	47763040	2308	+	NM_001278923	protein_coding	bA301J7.3	P5171	annexin A8-like 1	ANXA8L1
887	ANXA9	1.0916	0.93569	0.857175	0.345102	0.169506	0.0990497	0.349015	0.475456	0.253117	0.423446	0.354042	0.171277	0.432364	0.455044	0.692406	0.173325	0.53304	0.225252	0.275316	0.262419	0.249006	0.337808	0.275175	0.12608	0.351164	0.370235	0.614308	0.12896	0.446748	0.170867	0.208917	0.20079	0.189841	8416	chr1	150954499	150968114	1824	+	NM_003568	protein_coding	ANX31	P19680	annexin A9	ANXA9
888	AOAH	0.985055	0.978697	0.993546	0.324276	0.136178	0.355991	0.0310693	0.0093453	3.6794e-06	0.0665727	2.80055e-05	0	0.0563496	4.76465e-06	0.0370171	0	1.65419e-06	0	1.47175e-05	0	0	0.0465875	0	0	0.040121	0	0.0258391	0	0	0	0	0	0	313	chr7	36552549	36764154	2557	-	NM_001177507	protein_coding	.	P5752	acyloxyacyl hydrolase	AOAH
889	AOAH-IT1	1	1	1	1	1	1	0	0	0	0	0	0	0	0	0	0	0	0	0	0	0	0	0	0	0	0	0	0	0	0	0	0	0	100874264	chr7	36637440	36639726	573	-	NR_046764	lncRNA	.	.	AOAH intronic transcript 1	AOAH-IT1
890	AOC1	1	1	1	1	1	1	0	0	0	0	0	0	0	0	0	0	0	0	0	0	0	0	0	0	0	0	0	0	0	0	0	0	0	26	chr7	150549565	150558379	2626	+	NM_001091	protein_coding	.	P32426	amine oxidase, copper containing 1	AOC1
891	AOC2	0.913147	0.929059	1.01743	0.155071	0.313708	0.798649	1.6083	1.47721	1.50214	1.74982	1.62926	1.46048	1.57868	1.34969	1.48395	1.45689	1.6067	1.53282	1.4091	1.35139	1.6914	2.34459	2.07624	1.75219	1.99558	1.54608	1.79137	1.75547	2.04454	1.90703	1.64773	1.55926	2.24049	314	chr17	40996609	41002724	2584	+	NM_009590	protein_coding	DAO2|RAO	P34819	amine oxidase, copper containing 2	AOC2
892	AOC3	1.00376	1.0233	1.01947	0.960595	0.798676	0.850964	0.597022	0.602434	0.630247	0.500609	0.751842	0.566625	0.556363	0.705204	0.647939	0.708108	0.312825	0.849514	0.753924	0.496866	0.369505	0.410337	0.67813	0.481116	0.473002	0.629428	0.56502	0.637337	0.241936	0.807133	0.683311	0.413472	0.294163	8639	chr17	41003201	41010147	4351	+	NM_003734	protein_coding	HPAO|SSAO|VAP-1|VAP1	P10654	amine oxidase, copper containing 3	AOC3
893	AOC4P	0.99331	1.00188	1.00863	0.355787	0.868402	0.355903	0.00968611	2.25766e-06	0.0123953	1.53019e-05	0.0383453	0	0	2.59535e-06	5.53424e-06	0	9.01055e-07	0	8.0168e-06	0.048947	0	0	0.0265175	0	0	0	0	0	0	0	0	0.0347715	0	90586	chr17	41019162	41021234	2073	+	NR_002773	misc_RNA	.	.	amine oxidase, copper containing 4, pseudogene	AOC4P
894	AOX1	1.01116	0.992515	0.981564	0.593247	0.786576	0.58636	5.13602	5.15202	5.12518	5.15243	5.12813	5.1244	5.13895	5.17459	5.06977	5.16402	5.19649	5.0213	5.10808	5.17895	5.18631	34.2792	33.6901	33.8854	34.381	35.0673	32.4867	35.043	35.6517	31.6947	33.3428	35.3782	35.5871	316	chr2	201450731	201536217	4933	+	NM_001159	protein_coding	AO|AOH1	P18489	aldehyde oxidase 1	AOX1
895	AOX2P	1	1	1	1	1	1	0	0	0	0	0	0	0	0	0	0	0	0	0	0	0	0	0	0	0	0	0	0	0	0	0	0	0	344454	chr2	201560446	201658941	3733	+	NR_001557	pseudogene	AOH2|AOX2	.	aldehyde oxidase 2 pseudogene	AOX2P
896	AP1AR	1.01814	0.922542	0.906104	0.627981	0.0482347	0.0149651	4.10039	4.12633	3.98408	4.09262	3.99156	4.13868	4.17234	4.02718	4.17595	4.13639	4.16115	4.02809	3.91261	4.01153	3.9814	15.9275	14.7809	16.6161	17.1016	15.2824	17.0247	16.6763	16.8827	15.4207	13.9963	15.195	14.8704	55435	chr4	113152895	113191211	2908	+	NM_001128426	protein_coding	2C18|C4orf16|GBAR|gamma-BAR	P30951	adaptor related protein complex 1 associated regulatory protein	AP1AR
897	AP1B1	1.01058	1.01834	1.00768	0.576117	0.531822	0.749058	4.797	4.81219	4.82322	4.78137	4.85843	4.74451	4.80135	4.81175	4.81332	4.78789	4.8354	4.82525	4.77324	4.78184	4.90854	26.2789	27.7781	25.8092	26.9983	27.0472	27.0344	26.7709	27.5362	27.5367	26.2302	26.6249	29.1776	162	chr22	29723669	29784572	4118	-	NM_001166019	protein_coding	ADTB1|AP105A|BAM22|CLAPB2	P21592	adaptor related protein complex 1 beta 1 subunit	AP1B1
898	AP1B1P1	1	1	1	1	1	1	0	0	0	0	0	0	0	0	0	0	0	0	0	0	0	0	0	0	0	0	0	0	0	0	0	0	0	23782	chr22	32517964	32529456	827	+	NR_040114	misc_RNA	ADTB1L1|dJ127L4.2	.	adaptor related protein complex 1 beta 1 subunit pseudogene 1	AP1B1P1
899	AP1G1	0.958127	0.991221	1.03454	0.0361177	0.780287	0.324809	4.28754	4.22583	4.27482	4.30937	4.25087	4.31095	4.27813	4.22484	4.25916	4.17491	4.24305	4.16488	4.36543	4.26509	4.2967	18.6711	17.8887	18.8504	18.4802	17.6731	18.0937	17.1572	17.927	17.0555	19.528	18.3067	18.7462	164	chr16	71762905	71842976	6846	-	NM_001128	protein_coding	ADTG|CLAPG1|MGC18255	P33266	adaptor related protein complex 1 gamma 1 subunit	AP1G1
900	AP1G2	1.00147	1.00948	1.00799	0.978788	0.869707	0.810901	3.30307	3.30519	3.31668	3.49701	3.26668	3.24443	3.18412	3.30074	3.33903	3.35314	3.22443	3.33414	3.36101	3.35971	3.2063	10.2079	8.55158	8.47792	8.12478	8.84159	9.0918	9.26892	8.34233	9.14735	9.23438	9.30538	8.27225	8906	chr14	24028772	24037045	2804	-	NM_003917	protein_coding	G2AD	P10471	adaptor related protein complex 1 gamma 2 subunit	AP1G2
901	AP1M1	1.02414	1.07461	1.04928	0.227673	0.0063821	0.0547369	6.50551	6.53991	6.60931	6.50827	6.53447	6.46461	6.51378	6.60077	6.51606	6.51407	6.52697	6.65298	6.56139	6.59102	6.63014	89.281	90.939	87.3254	90.7634	95.9227	90.25	90.8913	91.173	100.313	93.0378	95.8168	98.5413	8907	chr19	16308665	16346156	2391	+	NM_001130524	protein_coding	AP47|CLAPM2|CLTNM|MU-1A	P24736	adaptor related protein complex 1 mu 1 subunit	AP1M1
902	AP1M2	1.05228	1.03463	0.983221	0.412812	0.646098	0.776262	4.7594	4.83292	4.80851	4.6585	4.96084	4.67621	4.72099	4.78859	4.83817	4.94513	4.75242	4.95643	4.65066	4.72148	4.88466	24.0493	29.8981	24.5697	25.4822	26.6005	27.5217	29.9659	25.9411	30.2501	24.0108	25.4935	28.6825	10053	chr19	10683347	10697991	1751	-	NM_005498	protein_coding	AP1-mu2|HSMU1B|MU-1B|MU1B|mu2	P11212	adaptor related protein complex 1 mu 2 subunit	AP1M2
903	AP1S1	1.04622	1.01537	0.970517	0.14476	0.74164	0.476452	5.95404	6.01922	5.97605	5.86513	5.93304	6.00234	6.01086	5.97467	6.05687	6.04912	5.99454	6.01401	5.81498	5.99057	6.07212	56.8082	59.598	63.1104	63.753	61.7986	65.3769	65.5712	62.7274	64.0595	55.0529	62.8544	66.6094	1174	chr7	100797686	100804557	1297	+	NM_001283	protein_coding	AP19|CLAPS1|FLJ92436|SIGMA1A|WUGSC:H_DJ0747G18.2	P31588	adaptor related protein complex 1 sigma 1 subunit	AP1S1
904	AP1S2	1.03001	0.971458	0.943154	0.326538	0.60439	0.286793	4.42989	4.47255	4.38812	4.4783	4.43479	4.46813	4.33389	4.41779	4.46842	4.46867	4.533	4.30046	4.58043	4.35922	4.29299	21.1137	20.4563	21.1352	19.2495	20.3452	21.0741	21.2565	22.1403	18.8357	22.8268	19.6097	18.698	8905	chrX	15843929	15873137	2329	-	NM_003916	protein_coding	MGC:1902|MRX59|SIGMA1B	P20819	adaptor related protein complex 1 sigma 2 subunit	AP1S2
905	AP1S3	0.983197	0.954281	0.97059	0.653611	0.446629	0.63378	3.5286	3.50415	3.46108	3.60617	3.45097	3.49756	3.55493	3.38823	3.55415	3.50493	3.56266	3.34795	3.63961	3.31268	3.51966	11.0865	9.85197	10.2957	10.7982	9.45647	10.7143	10.4093	10.8107	9.24759	11.4146	8.97688	10.5213	130340	chr2	224620047	224702319	4041	-	NM_001039569	protein_coding	.	P34928	adaptor related protein complex 1 sigma 3 subunit	AP1S3
906	AP2A1	0.970063	0.989835	1.02038	0.22191	0.690311	0.358078	5.76341	5.71956	5.74867	5.78135	5.80137	5.68257	5.78534	5.75959	5.71543	5.67343	5.72846	5.78484	5.78206	5.68519	5.74034	53.5523	54.3169	50.3653	54.3815	53.1014	51.3878	50.3105	51.9943	54.5024	53.792	50.6734	52.7202	160	chr19	50270180	50310369	3499	+	NM_014203	protein_coding	ADTAA|AP2-ALPHA|CLAPA1	P384	adaptor related protein complex 2 alpha 1 subunit	AP2A1
907	AP2A2	1.08074	1.05679	0.977842	0.0257134	0.0808689	0.33216	4.40251	4.51453	4.4822	4.39678	4.47296	4.31868	4.41739	4.47717	4.5735	4.51763	4.48786	4.46016	4.5262	4.50826	4.43225	19.8962	21.0314	18.9571	20.4556	21.2422	22.7424	22.0247	21.4273	21.1555	21.9468	21.8514	20.693	161	chr11	925809	1012245	4804	+	NM_012305	protein_coding	ADTAB|CLAPA2|HIP9|HYPJ	P11798	adaptor related protein complex 2 alpha 2 subunit	AP2A2
908	AP2B1	0.968956	0.985819	1.0174	0.1249	0.54687	0.54611	6.95294	6.90745	6.93234	6.95508	6.9768	6.92651	6.95294	6.96386	6.85823	6.88002	6.92537	6.84924	6.99501	6.92309	6.95803	122.056	123.926	120.656	123.414	123.659	114.673	117.424	120.488	115.084	126.009	120.877	123.944	163	chr17	33914282	34053436	5763	+	NM_001282	protein_coding	ADTB2|AP105B|AP2-BETA|CLAPB1|DKFZp781K0743	P14666	adaptor related protein complex 2 beta 1 subunit	AP2B1
909	AP2M1	0.987007	1.01707	1.03046	0.655466	0.591795	0.382566	7.45998	7.44111	7.4844	7.4228	7.51617	7.40772	7.49039	7.49358	7.35458	7.47663	7.4357	7.55785	7.40902	7.44452	7.52137	169.171	180.556	168.821	179.576	178.963	162.172	178.077	172.044	188.705	168.22	173.941	183.63	1173	chr3	183892634	183901879	2076	+	NM_004068	protein_coding	AP50|CLAPM1|mu2	P9542	adaptor related protein complex 2 mu 1 subunit	AP2M1
910	AP2S1	1.05096	1.04118	0.990686	0.23256	0.466035	0.861929	8.09766	8.16938	8.15588	7.9901	8.10846	8.11325	8.1728	8.18961	8.22207	8.20876	8.05066	8.27824	7.97323	8.14557	8.20901	251.142	272.713	275.935	288.796	290.546	296.707	296.464	264.019	311.566	249.201	283.402	296.378	1175	chr19	47341415	47354252	1218	-	NM_001301076	protein_coding	AP17|AP17-DELTA|CLAPS2	P11984	adaptor related protein complex 2 sigma 1 subunit	AP2S1
911	AP3B1	1.00428	0.997229	0.992984	0.895489	0.941613	0.868467	4.96708	4.97324	4.96308	4.91858	4.93385	4.98231	5.03088	5.02878	4.86881	5.02594	4.96363	4.85285	4.92281	5.0618	5.00609	28.9995	29.3198	30.6132	31.8263	31.6004	28.1324	31.7522	30.1886	28.0911	29.2042	32.5398	31.2902	8546	chr5	77298150	77590579	4353	-	NM_001271769	protein_coding	ADTB3|ADTB3A|HPS|HPS2|PE	P17374	adaptor related protein complex 3 beta 1 subunit	AP3B1
912	AP3B2	1	1	1	1	1	1	0	0	0	0	0	0	0	0	0	0	0	0	0	0	0	0	0	0	0	0	0	0	0	0	0	0	0	8120	chr15	83328033	83378660	3787	-	NM_001278511	protein_coding	DKFZp686D17136|NAPTB	P27679	adaptor related protein complex 3 beta 2 subunit	AP3B2
913	AP3D1	1.01633	1.03358	1.01697	0.492311	0.325639	0.568242	5.64594	5.6693	5.69358	5.60023	5.69336	5.59906	5.68822	5.69267	5.70655	5.64718	5.62942	5.72871	5.58279	5.72341	5.73395	47.1137	50.326	47.4763	50.7761	50.6491	51.067	49.3841	48.4783	52.3837	46.7218	52.0587	52.4813	8943	chr19	2100987	2151556	5056	-	NM_001261826	protein_coding	ADTD|hBLVR	P3664	adaptor related protein complex 3 delta 1 subunit	AP3D1
914	AP3M1	0.958241	0.946374	0.987616	0.181726	0.253919	0.747502	4.20481	4.14327	4.12529	4.28389	4.156	4.24741	4.12618	4.17422	4.11656	4.11843	4.16294	4.05398	4.268	4.10982	4.05874	18.3289	16.6873	17.995	16.533	17.0296	16.2967	16.4592	16.9048	15.7193	18.1879	16.337	15.7448	26985	chr10	75880015	75910826	5253	-	NM_207012	protein_coding	MGC22164	P5496	adaptor related protein complex 3 mu 1 subunit	AP3M1
915	AP3M2	0.910512	0.908259	0.997525	0.00452996	0.00212759	0.914382	3.38452	3.24927	3.2457	3.39914	3.41895	3.38637	3.33219	3.18524	3.2835	3.23164	3.29409	3.23834	3.2596	3.28874	3.19447	9.47184	9.61712	9.4578	9.10991	8.08418	8.71062	8.44029	8.80451	8.49614	8.53918	8.81102	8.19653	10947	chr8	42010464	42028701	3670	+	NM_006803	protein_coding	AP47B|CLA20|P47B	P276	adaptor related protein complex 3 mu 2 subunit	AP3M2
916	AP3S1	1.10633	1.04067	0.940653	0.000166619	0.38182	0.179337	6.09959	6.24537	6.15711	6.09186	6.1205	6.11886	6.06648	6.21038	6.26266	6.24632	6.2615	6.11598	6.22341	6.2701	6.00446	66.647	68.0056	68.5032	66.3007	72.945	75.5535	75.3226	75.6816	68.8271	73.3994	76.5057	63.517	1176	chr5	115177619	115249778	1289	+	NM_001284	protein_coding	CLAPS3|Sigma3A	P25625	adaptor related protein complex 3 sigma 1 subunit	AP3S1
917	AP3S2	0.952148	0.937595	0.984716	0.693184	0.313033	0.899829	1.59144	1.5207	1.49848	1.71024	1.43273	1.68846	1.51559	1.33177	1.8968	1.56827	1.18315	1.54253	1.37307	1.46093	1.60676	2.25392	1.68412	2.22336	1.86749	1.51464	2.71653	1.97654	1.26994	1.9267	1.58236	1.76109	2.05599	10239	chr15	90373831	90437617	6049	-	NR_023361	protein_coding	AP3S3|FLJ35955|sigma3b	.	adaptor related protein complex 3 sigma 2 subunit	AP3S2
918	AP4B1	0.931868	0.945524	1.01465	0.0441824	0.184901	0.705358	3.18163	3.07982	3.10081	3.13992	3.2637	3.1374	3.18185	3.10185	3.12238	3.09115	3.00096	3.13025	3.16521	3.13963	2.95914	7.74953	8.5351	7.80017	8.1088	7.57431	7.68483	7.56355	7.00174	7.80937	7.93599	7.84705	6.81226	10717	chr1	114436817	114447746	3221	-	NM_006594	protein_coding	BETA-4	P13807	adaptor related protein complex 4 beta 1 subunit	AP4B1
919	AP4B1-AS1	0.918318	0.928168	1.01073	0.224568	0.00904429	0.874394	0.531391	0.408457	0.423849	0.577228	0.477401	0.520129	0.548923	0.372639	0.557166	0.52751	0.139507	0.393901	0.39103	0.465596	0.443445	0.48761	0.388379	0.434135	0.465156	0.294154	0.46983	0.444147	0.101412	0.316775	0.309536	0.382876	0.362066	100287722	chr1	114355234	114443859	2148	+	NR_125965	lncRNA	.	.	AP4B1 antisense RNA 1	AP4B1-AS1
920	AP4E1	0.990492	0.920105	0.928936	0.773379	0.120647	0.118159	2.35317	2.33939	2.23304	2.42261	2.25384	2.40715	2.32269	2.34124	2.27334	2.35254	2.38805	2.091	2.30576	2.1906	2.33207	4.32585	3.73705	4.30469	4.01992	4.06158	3.8225	4.12976	4.23243	3.2851	3.92673	3.58141	4.05564	23431	chr15	51200869	51298097	6906	+	NM_001252127	protein_coding	DKFZp686L12167	P11758	adaptor related protein complex 4 epsilon 1 subunit	AP4E1
921	AP4M1	1.01415	1.0619	1.04709	0.689116	0.328358	0.410223	3.17298	3.19325	3.25963	3.1095	3.09378	3.22397	3.25769	3.22661	3.17497	3.24133	3.12728	3.42054	3.10474	3.30365	3.1899	7.56526	7.47242	8.34443	8.60082	8.34884	8.00692	8.50287	7.73394	9.77113	7.56811	8.91207	8.16658	9179	chr7	99699130	99704803	1868	+	NM_004722	protein_coding	CPSQ3|MU-4|MU-ARP2	P36087	adaptor related protein complex 4 mu 1 subunit	AP4M1
922	AP4S1	1.01072	1.06669	1.05538	0.893685	0.303173	0.47416	1.85012	1.86551	1.94327	1.80856	2.02364	1.82619	1.72519	1.76695	2.10994	1.76066	1.79379	2.04874	1.9012	1.99921	1.81251	2.4808	3.04129	2.54627	2.31705	2.39967	3.30731	2.40271	2.46594	3.15821	2.72304	3.01063	2.52586	11154	chr14	31494312	31565656	6263	+	NM_001254729	protein_coding	AP47B|CLA20|CLAPS4|FLJ32366	P5669	adaptor related protein complex 4 sigma 1 subunit	AP4S1
923	AP5B1	0.949372	0.984318	1.03681	0.109234	0.660617	0.281845	3.09131	3.01635	3.0685	3.09016	3.1014	3.00552	3.16376	2.9755	3.07587	2.98785	3.02405	3.07566	3.05427	2.97838	3.15989	7.45337	7.51979	7.03142	7.99489	6.85529	7.40952	6.97193	7.13093	7.48195	7.27451	6.91184	7.97656	91056	chr11	65541369	65548062	6595	-	NM_138368	protein_coding	.	P33506	adaptor related protein complex 5 beta 1 subunit	AP5B1
924	AP5M1	1.01839	0.978403	0.960737	0.599093	0.607044	0.339691	4.02606	4.05235	3.99456	4.10483	3.94205	4.05552	3.99665	3.98665	4.11973	4.00967	4.08917	4.00824	4.11244	3.94943	3.89934	16.0727	14.2487	15.6294	15.0271	14.8314	16.3359	15.1907	16.0123	15.1957	16.2268	14.5127	13.9932	55745	chr14	57735606	57756797	3095	+	NM_018229	protein_coding	.	P13811	adaptor related protein complex 5 mu 1 subunit	AP5M1
925	AP5S1	1.00962	1.0441	1.03416	0.810291	0.519149	0.597983	3.83888	3.85269	3.90115	3.9041	3.76942	3.75592	3.91837	3.94008	3.83954	3.77363	3.85262	4.10745	3.90444	3.77414	3.79373	13.8554	12.5295	12.511	14.1795	14.329	13.2754	12.7474	13.4396	16.3438	13.9139	12.7377	12.9339	55317	chr20	3801171	3805954	1808	+	NM_001204447	protein_coding	.	P5442	adaptor related protein complex 5 sigma 1 subunit	AP5S1
926	AP5Z1	1.02975	1.00474	0.975706	0.336495	0.891248	0.558226	2.99428	3.03657	3.00109	3.02191	3.01602	2.94559	2.99234	3.00573	3.12404	3.0562	2.95489	3.11546	2.97985	2.99879	2.90214	7.06283	7.0301	6.70462	6.98769	7.02177	7.69553	7.35768	6.75034	7.71816	6.85846	7.02407	6.50901	9907	chr7	4815262	4834026	5519	+	NM_014855	protein_coding	.	P22425	adaptor related protein complex 5 zeta 1 subunit	AP5Z1
927	APAF1	1.12793	1.18551	1.05104	0.00410957	0.00360987	0.145094	2.83577	3.00945	3.08127	2.89456	2.72933	2.87109	2.84259	3.04546	3.02111	2.96108	3.00885	3.00869	3.17603	3.10404	3.03029	6.38086	5.58085	6.31688	6.20067	7.24591	7.09652	6.82474	7.04578	7.09675	8.00457	7.63047	7.20538	317	chr12	99039078	99129211	7158	+	NM_013229	protein_coding	APAF-1|CED4|DKFZp781B1145	P2576	apoptotic peptidase activating factor 1	APAF1
928	APBA1	1.07549	1.01105	0.940087	0.00906073	0.538908	0.0272095	0.27595	0.380941	0.291806	0.251143	0.296848	0.251631	0.303349	0.365772	0.448402	0.358042	0.34934	0.317112	0.242246	0.276912	0.329322	0.187829	0.225904	0.190582	0.235334	0.288077	0.363329	0.283573	0.273811	0.248032	0.181641	0.212883	0.258061	320	chr9	72042449	72287275	6584	-	NM_001163	protein_coding	D9S411E|MINT1|X11|X11A|X11ALPHA	P26340	amyloid beta precursor protein binding family A member 1	APBA1
929	APBA2	0.993843	0.984448	0.990547	0.871035	0.6666	0.739769	2.8167	2.80779	2.79409	2.77906	2.80103	2.93576	2.74351	2.81045	2.83073	2.86493	2.72119	2.73574	2.82666	2.76773	2.84361	5.81432	5.91927	6.6523	5.72199	6.00643	6.09584	6.31917	5.59134	5.70112	6.06756	5.83617	6.20901	321	chr15	29213840	29410516	3637	+	NM_001130414	protein_coding	D15S1518E|HsT16821|LIN-10|MGC99508|MGC:14091|MINT2|X11L	P22059	amyloid beta precursor protein binding family A member 2	APBA2
930	APBA3	1.01263	1.05744	1.04425	0.759823	0.228917	0.257712	3.26904	3.28715	3.34962	3.35753	3.33721	3.17526	3.19701	3.21933	3.26246	3.36957	3.29305	3.41431	3.28505	3.2789	3.41416	9.17342	9.03113	8.03423	8.20655	8.30144	8.56985	9.3863	8.79749	9.72621	8.70902	8.74449	9.70747	9546	chr19	3750771	3761673	2158	-	NM_004886	protein_coding	MGC:15815|X11L2|mint3	P21898	amyloid beta precursor protein binding family A member 3	APBA3
931	APBB1	1.0565	1.06023	1.00352	0.302214	0.266269	0.95157	3.27186	3.35116	3.35624	3.19458	3.21169	3.32962	3.34522	3.23648	3.32283	3.3273	3.50466	3.27132	3.26929	3.37044	3.50127	8.08459	8.19338	9.05442	9.20186	8.41268	8.97892	9.08705	10.3454	8.71588	8.60325	9.38239	10.3735	322	chr11	6416354	6440702	3202	-	NR_047512	protein_coding	FE65|MGC:9072|RIR	.	amyloid beta precursor protein binding family B member 1	APBB1
932	APBB1IP	0.853138	0.803445	0.941753	7.24812e-05	1.52334e-08	0.0180811	4.8894	4.66025	4.57367	4.8965	4.88717	4.87763	4.89621	4.58486	4.70209	4.67492	4.6764	4.58257	4.58759	4.56364	4.56069	28.5509	28.361	28.4007	28.8983	22.9652	24.9543	24.6792	24.5583	23.1207	22.9414	22.7485	22.7151	54518	chr10	26727266	26856732	2637	+	NM_019043	protein_coding	INAG1|PREL1|RARP1|RIAM	P3434	amyloid beta precursor protein binding family B member 1 interacting protein	APBB1IP
933	APBB2	1.03343	1.08879	1.05357	0.173539	0.0161644	0.0808669	3.9273	3.97474	4.05003	3.97958	3.90282	3.87824	3.94646	3.98608	3.93723	3.94605	4.02782	3.97551	4.11114	4.03564	4.07434	14.6518	13.8398	13.7065	14.4791	14.8253	14.2751	14.4924	15.3041	14.8322	16.2118	15.4667	15.9242	323	chr4	40812044	41216635	9363	-	NM_001166051	protein_coding	DKFZp434E033|FE65L|FE65L1|MGC35575	P33074	amyloid beta precursor protein binding family B member 2	APBB2
934	APBB3	0.958323	1.00808	1.05192	0.529318	0.891704	0.368154	1.87474	1.81332	1.88635	1.96645	1.93496	1.92138	1.65527	1.63787	1.93619	1.84057	1.82275	1.84689	1.92269	1.98659	1.78091	2.8842	2.80031	2.78815	2.16012	2.10867	2.81843	2.59617	2.53624	2.61567	2.77909	2.97558	2.44937	10307	chr5	139937853	139944189	2131	-	NM_006051	protein_coding	FE65L2|MGC150555|MGC87674|SRA	P2237	amyloid beta precursor protein binding family B member 3	APBB3
935	APC	1.00208	0.998044	0.995974	0.941019	0.950287	0.915912	3.21887	3.22187	3.21605	3.23417	3.25958	3.18449	3.19599	3.20521	3.2385	3.13589	3.30284	3.10758	3.28822	3.26387	3.19779	8.33968	8.50613	8.09221	8.19929	8.21111	8.41264	7.83399	8.8643	7.67353	8.73121	8.64278	8.21687	324	chr5	112043202	112181936	11216	+	NM_001127511	protein_coding	BTPS2|DP2|DP2.5|DP3|GS	P18457	adenomatous polyposis coli	APC
936	APC2	1.05454	1.06628	1.01113	0.216501	0.117343	0.722924	0.861508	0.938126	0.954098	0.98754	0.804991	0.830607	0.815065	0.86765	1.00119	0.989644	0.889176	0.961216	1.02395	0.915272	0.91313	0.97426	0.739769	0.778529	0.763193	0.823366	0.998527	0.991319	0.851651	0.953853	1.02887	0.890147	0.887973	10297	chr19	1450148	1473243	10151	+	NM_005883	protein_coding	APCL	P4114	adenomatosis polyposis coli 2	APC2
937	APCDD1	0.974673	0.980945	1.00643	0.15128	0.295579	0.355876	0.0370139	4.76551e-06	0.00925799	0.0897495	3.22002e-05	0	0.0562288	5.47831e-06	1.16817e-05	0	1.90196e-06	0	1.6922e-05	0	0.0366643	0.0633916	0	0	0.0400351	0	0	0	0	0	0	0	0.0259904	147495	chr18	10454625	10488698	2562	+	NM_153000	protein_coding	B7323|DRAPC1	P20091	adenomatosis polyposis coli down-regulated 1	APCDD1
938	APCDD1L	0.987877	0.949473	0.961125	0.884268	0.575629	0.676845	1.98769	1.9701	1.91289	2.09235	2.10543	1.75134	1.97441	1.81737	2.07642	1.81685	2.13969	1.80194	2.15927	1.93811	1.71224	3.23794	3.2767	2.367	2.9424	2.52051	3.20808	2.53812	3.40508	2.50555	3.45251	2.84478	2.28964	164284	chr20	57034160	57089994	4100	-	NM_153360	protein_coding	FLJ90166|MGC126807|MGC126809|RP4-685L9.2	P34778	adenomatosis polyposis coli down-regulated 1 like	APCDD1L
939	APCDD1L-AS1	1.01244	1.01854	1.00603	0.788893	0.813501	0.930481	0.169916	0.187747	0.196416	0.0384655	0.145646	0.313245	0.168931	0.179137	0.269327	0.149563	0.149584	0.194995	0.000212877	0.424366	0.132962	0.0263133	0.104786	0.242529	0.125033	0.131929	0.204484	0.110199	0.109163	0.146139	0	0.343459	0.0973664	149773	chr20	57090435	57194948	2096	+	NR_034147	lncRNA	.	.	APCDD1L antisense RNA 1 (head to head)	APCDD1L-AS1
940	APCS	1	1	1	1	1	1	0	0	0	0	0	0	0	0	0	0	0	0	0	0	0	0	0	0	0	0	0	0	0	0	0	0	0	325	chr1	159557616	159558661	931	+	NM_001639	protein_coding	MGC88159|PTX2|SAP	P32800	amyloid P component, serum	APCS
941	APEH	0.999012	0.997439	0.998425	0.970762	0.940326	0.964848	5.21141	5.20999	5.20771	5.15598	5.2202	5.19481	5.2722	5.28401	5.17487	5.21885	5.15894	5.19835	5.13059	5.17699	5.31821	34.364	35.9765	35.63	37.8038	37.9093	35.0174	36.4398	34.7099	35.9614	33.882	35.3301	39.0892	327	chr3	49711435	49720934	2758	+	NM_001640	protein_coding	ACPH|APH|D3F15S2|D3S48E|DNF15S2|MGC2178|OPH	P13351	acylaminoacyl-peptide hydrolase	APEH
942	APELA	1.00533	0.999999	0.994693	0.356017	0.288923	0.355903	2.65813e-06	0.00767767	6.97378e-07	5.32442e-06	5.30809e-06	0	0	9.03074e-07	1.92568e-06	0	0.0304657	0	2.78951e-06	0	0	0	0	0	0	0	0	0	0.0213214	0	0	0	0	100506013	chr4	165798140	165818679	2622	+	NM_001297550	protein_coding	.	P6639	apelin receptor early endogenous ligand	APELA
943	APEX1	0.997284	0.991226	0.993926	0.930418	0.837057	0.890085	6.95719	6.95327	6.94448	6.89364	7.02172	6.92593	6.98404	6.97565	6.98381	6.99486	6.85432	7.0342	6.79146	6.94528	6.99538	116.922	127.878	120.607	126.125	124.682	125.195	127.234	114.65	130.958	109.292	122.766	127.221	328	chr14	20923290	20925931	1487	+	NM_080648	protein_coding	APE|APE1|APEN|APEX|APX|HAP1|REF1	P33288	apurinic/apyrimidinic endodeoxyribonuclease 1	APEX1
944	APEX2	0.987748	0.965821	0.977801	0.233361	0.119345	0.27302	4.87904	4.86126	4.82887	4.85106	4.88733	4.87564	4.90167	4.8422	4.85453	4.86889	4.87914	4.88236	4.78702	4.78108	4.86225	27.6293	28.3599	28.3601	29.0139	27.6454	27.8465	28.3743	28.4145	28.689	26.491	26.6109	28.2263	27301	chrX	55026756	55034306	2095	+	NM_014481	protein_coding	APE2|APEXL2|XTH2	P34174	apurinic/apyrimidinic endodeoxyribonuclease 2	APEX2
945	APH1A	0.981218	1.00847	1.02777	0.490885	0.769592	0.269015	5.95214	5.92478	5.96431	6.01313	5.95942	5.86413	5.96782	5.90253	5.98505	5.90053	5.90928	5.99423	6.01139	5.89905	5.94994	63.0598	60.7183	57.2539	61.8497	58.7358	62.1533	59.0579	59.0704	63.1729	63.2318	58.9305	61.1206	51107	chr1	150237799	150241609	1792	-	NM_001077628	protein_coding	6530402N02Rik|APH-1|APH-1A|CGI-78	P2970	aph-1 homolog A, gamma secretase subunit	APH1A
946	APH1B	1.01082	1.02449	1.01353	0.772119	0.385551	0.643129	1.28566	1.30119	1.32057	1.20657	1.37554	1.27982	1.27569	1.1851	1.32964	1.33441	1.34957	1.30533	1.35606	1.29255	1.32752	1.29578	1.5812	1.42825	1.42763	1.27177	1.50865	1.53036	1.54757	1.48205	1.55287	1.4563	1.51758	83464	chr15	63569749	63601325	4193	+	NM_031301	protein_coding	APH-1B|DKFZp564D0372|FLJ33115|PRO1328|PSFL|TAAV688	P5373	aph-1 homolog B, gamma secretase subunit	APH1B
947	API5	1.00717	0.980061	0.973081	0.634559	0.277328	0.100083	5.92738	5.93769	5.89832	5.92158	5.88939	5.97315	5.92415	5.93435	5.96835	5.93233	5.91522	5.9151	5.91702	5.91362	5.84632	59.1191	57.7931	61.8263	59.976	60.0683	61.4266	60.395	59.3183	59.7492	59.1637	59.538	56.8169	8539	chr11	43333505	43366080	5963	+	NM_006595	protein_coding	AAC-11|AAC11	P24684	apoptosis inhibitor 5	API5
948	APIP	1.03763	0.963652	0.928707	0.419518	0.591565	0.328495	5.28033	5.33362	5.22691	5.17851	5.28668	5.34216	5.30881	5.27291	5.35197	5.46129	5.23799	5.14837	4.99559	5.34055	5.38935	34.9191	37.7195	39.569	38.8019	37.6106	39.7226	43.288	36.7211	34.7058	30.7633	39.6902	41.1159	51074	chr11	34903843	34937958	1277	-	NM_015957	protein_coding	APIP2|CGI29|MMRP19|dJ179L10.2	P15089	APAF1 interacting protein	APIP
949	APITD1	1.0287	0.970755	0.943675	0.545398	0.574069	0.380318	3.98665	4.02746	3.94383	3.90542	4.0011	4.01783	4.01921	4.11815	3.87695	4.116	3.98485	4.06132	3.74361	3.93648	4.01395	13.8663	14.8877	15.2006	15.279	16.3429	13.6497	16.4271	14.8256	15.8012	12.338	14.3738	15.231	378708	chr1	10490159	10490625	467	+	NM_199294	.	CENP-S|CENPS|MGC32686|MHF1	P34624	apoptosis-inducing, TAF9-like domain 1	APITD1
950	APITD1-CORT	1.04148	0.979327	0.940319	0.832953	0.924669	0.579072	1.33573	1.39437	1.30559	0.5223	1.19664	1.4248	1.88091	1.44625	1.23315	1.4589	1.4277	1.35213	1.64432	1.1777	0.960786	0.428979	1.27981	1.68495	2.69254	1.72255	1.34625	1.7585	1.68934	1.56406	2.11753	1.2685	0.952654	100526739	chr1	10490159	10512060	2151	+	NM_001270517	protein_coding	.	P34624	APITD1-CORT readthrough	APITD1-CORT
951	APLF	1.03496	0.999078	0.965327	0.53513	0.991893	0.630752	1.20394	1.25352	1.20261	1.16546	0.993409	1.31617	1.31656	1.20934	1.26185	1.28821	1.25355	0.939824	1.16223	1.43239	1.23324	1.23172	0.98086	1.4902	1.49712	1.31034	1.39366	1.45032	1.38356	0.926273	1.2321	1.70595	1.35807	200558	chr2	68694691	68807294	3849	+	NM_173545	protein_coding	APFL|C2orf13|FLJ16593|MGC47799|PALF|Xip1	P19723	aprataxin and PNKP like factor	APLF
952	APLN	0.914535	0.874129	0.955818	0.234724	0.00845066	0.575219	1.72589	1.597	1.53181	1.65451	1.72399	1.75368	1.76874	1.55182	1.46546	1.86105	1.4722	1.48031	1.59111	1.42613	1.62095	2.12988	2.28454	2.37242	2.41754	1.92895	1.75559	2.64622	1.77347	1.80372	2.00357	1.69561	2.08655	8862	chrX	128779236	128788933	3224	-	NM_017413	protein_coding	APEL|XNPEP2	P17004	apelin	APLN
953	APLNR	1	1	1	1	1	1	0	0	0	0	0	0	0	0	0	0	0	0	0	0	0	0	0	0	0	0	0	0	0	0	0	0	0	187	chr11	57001052	57004927	1943	-	NR_027991	protein_coding	AGTRL1|APJ|APJR|FLJ90771|FLJ96609|HG11|MGC45246	.	apelin receptor	APLNR
954	APLP1	0.960814	0.967049	1.00649	0.415613	0.664096	0.936305	1.43917	1.3815	1.39083	1.37352	1.4421	1.38444	1.54975	1.52111	1.36827	1.28058	1.34508	1.6078	1.14807	1.46341	1.30307	1.57692	1.7025	1.61089	1.9357	1.8675	1.57651	1.43812	1.53963	2.06125	1.20976	1.76538	1.47565	333	chr19	36359401	36370699	2474	+	NM_001024807	protein_coding	APLP	P32201	amyloid beta precursor like protein 1	APLP1
955	APLP2	0.987114	0.955243	0.967713	0.510756	0.242761	0.344475	8.2341	8.21539	8.16804	8.17664	8.21399	8.28877	8.25455	8.22788	8.21103	8.23581	8.18635	8.16766	8.03488	8.21423	8.24653	285.951	293.485	311.762	305.69	298.384	294.436	302.096	290.155	288.509	260.124	297.264	304.213	334	chr11	129939716	130014706	3895	+	NR_024516	protein_coding	APPH|APPL2|CDEBP	.	amyloid beta precursor like protein 2	APLP2
956	APMAP	1.02878	1.03943	1.01035	0.213025	0.389559	0.819006	6.18599	6.22693	6.24178	6.1839	6.15862	6.16908	6.2313	6.2623	6.23052	6.25708	6.15531	6.3208	6.07523	6.32557	6.23155	71.1041	69.8531	70.9652	74.444	75.6542	73.8657	75.8951	70.2398	79.4749	66.134	79.5437	74.5117	57136	chr20	24943580	24973425	2221	-	NM_020531	protein_coding	.	P14777	adipocyte plasma membrane associated protein	APMAP
957	APOA1	1.07234	1.22053	1.13819	0.672259	0.262286	0.3989	0.359303	0.46006	0.646807	0.195437	0.101445	0.200964	0.81872	0.728836	0.311773	0.105151	0.611886	0.679265	0.134278	0.812318	0.854312	0.14265	0.0710597	0.149497	0.766771	0.656407	0.240109	0.0768105	0.52798	0.605458	0.0964805	0.759005	0.811445	335	chr11	116706469	116708338	897	-	NM_000039	protein_coding	MGC117399	P18347	apolipoprotein A1	APOA1
958	APOA1-AS	1.13802	0.989285	0.869302	0.136746	0.867532	0.0783561	0.314053	0.500582	0.298511	0.1869	0.496706	0.198592	0.351515	0.364141	0.553025	0.685506	0.374732	0.258175	0.243413	0.244801	0.438095	0.136225	0.407286	0.147605	0.277431	0.286596	0.465716	0.611301	0.296415	0.198025	0.182523	0.186196	0.356872	104326055	chr11	116706833	116726445	563	+	NR_126362	antisense_RNA	.	.	APOA1 antisense RNA	APOA1-AS
959	APOA1BP	1.05734	1.04599	0.989265	0.160704	0.443764	0.825293	5.47274	5.55318	5.53761	5.36559	5.52854	5.42397	5.56411	5.57402	5.53719	5.6024	5.49694	5.62894	5.42484	5.42145	5.65822	39.8898	44.7851	41.9361	46.5076	46.5719	45.3001	47.8417	44.1373	48.8147	41.7731	42.0401	49.7446	.	chr1	156561558	156564091	1121	+	NM_144772	.	AIBP|MGC119143|MGC119144|MGC119145|YJEFN1	P18527	.	APOA1BP
960	APOA2	1	1	1	1	1	1	0	0	0	0	0	0	0	0	0	0	0	0	0	0	0	0	0	0	0	0	0	0	0	0	0	0	0	336	chr1	161192083	161193418	473	-	NM_001643	protein_coding	Apo-AII|ApoA-II|apoAII	P28395	apolipoprotein A2	APOA2
961	APOA4	1	1	1	1	1	1	0	0	0	0	0	0	0	0	0	0	0	0	0	0	0	0	0	0	0	0	0	0	0	0	0	0	0	337	chr11	116691418	116694011	1460	-	NM_000482	protein_coding	MGC142154|MGC142156	P26722	apolipoprotein A4	APOA4
962	APOA5	1	1	1	1	1	1	0	0	0	0	0	0	0	0	0	0	0	0	0	0	0	0	0	0	0	0	0	0	0	0	0	0	0	116519	chr11	116660086	116663136	1908	-	NM_001166598	protein_coding	APOAV|FLJ97995|MGC126836|MGC126838|RAP3	P9751	apolipoprotein A5	APOA5
963	APOB	1	1	1	1	1	1	0	0	0	0	0	0	0	0	0	0	0	0	0	0	0	0	0	0	0	0	0	0	0	0	0	0	0	338	chr2	21224301	21266945	14121	-	NM_000384	protein_coding	FLDB|LDLCQ4	P25486	apolipoprotein B	APOB
964	APOBEC1	1	1	1	1	1	1	0	0	0	0	0	0	0	0	0	0	0	0	0	0	0	0	0	0	0	0	0	0	0	0	0	0	0	339	chr12	7801996	7823195	882	-	NM_005889	protein_coding	APOBEC-1|BEDP|CDAR1|HEPR	P25356	apolipoprotein B mRNA editing enzyme catalytic subunit 1	APOBEC1
965	APOBEC2	1.04572	1.01424	0.969904	0.411705	0.820447	0.607266	0.313877	0.378368	0.334283	0.276345	0.469112	0.237272	0.260668	0.470398	0.302183	0.447519	0.283674	0.131584	0.362	0.446329	0.378213	0.208606	0.380783	0.178791	0.199279	0.384899	0.232048	0.365914	0.21714	0.0968847	0.283655	0.364331	0.301557	10930	chr6	41020940	41032630	1634	+	NM_006789	protein_coding	ARCD1|ARP1	P24053	apolipoprotein B mRNA editing enzyme catalytic subunit 2	APOBEC2
966	APOBEC3A	0.923131	0.98627	1.0684	0.314633	0.864488	0.347651	0.453665	0.338273	0.433721	0.420523	0.372994	0.6826	0.309853	0.465771	0.357335	0.337525	0.177943	0.550642	0.485534	0.467957	0.207717	0.334972	0.29185	0.60509	0.241049	0.380432	0.279929	0.265568	0.131145	0.468105	0.398129	0.385071	0.15624	200315	chr22	39353527	39359188	1535	+	NM_145699	protein_coding	ARP3|PHRBN|bK150C2.1	P26816	apolipoprotein B mRNA editing enzyme catalytic subunit 3A	APOBEC3A
967	APOBEC3A_B	1	1	1	1	1	1	0	0	0	0	0	0	0	0	0	0	0	0	0	0	0	0	0	0	0	0	0	0	0	0	0	0	0	100913187	chr22	39353527	39388783	547	+	NM_001193289	protein_coding	.	P1236	APOBEC3A and APOBEC3B deletion hybrid	APOBEC3A_B
968	APOBEC3B	0.93651	0.970852	1.03667	0.331125	0.602511	0.445883	4.10522	4.01059	4.06254	4.12615	4.28179	4.01368	3.9797	3.99586	4.06344	3.85514	4.11491	4.04279	4.07573	3.98493	4.14225	16.3264	18.3038	15.1541	14.8405	14.9327	15.6718	13.5483	16.3186	15.5884	15.7931	14.8993	16.7402	9582	chr22	39378404	39388154	1409	+	NM_001270411	protein_coding	APOBEC1L|ARCD3|ARP4|DJ742C19.2|FLJ21201|PHRBNL|bK150C2.2	P19865	apolipoprotein B mRNA editing enzyme catalytic subunit 3B	APOBEC3B
969	APOBEC3B-AS1	1.04151	1.04991	1.00806	0.78119	0.701099	0.932489	0.513686	0.572362	0.583946	0.00137037	0.842981	0.608911	0.476082	0.269113	0.834664	0.516227	0.61269	0.50662	0.618199	0.732979	0.462609	0	0.787663	0.525169	0.393098	0.204553	0.781246	0.433095	0.528819	0.424293	0.532376	0.664954	0.380496	100874530	chr22	39387564	39394225	702	-	NR_104187	lncRNA	.	.	APOBEC3B antisense RNA 1	APOBEC3B-AS1
970	APOBEC3C	1.05676	0.984904	0.932002	0.309926	0.823261	0.342892	3.09831	3.17796	3.07636	3.0515	3.22612	3.04006	3.06749	3.09955	3.1668	3.32997	3.10318	2.96319	2.90482	3.14574	3.26324	7.22854	8.28951	7.22603	7.41525	7.56068	7.95657	9.1032	7.58936	6.84746	6.45901	7.88455	8.64309	27350	chr22	39410265	39414825	1109	+	NM_014508	protein_coding	APOBEC1L|ARDC2|ARDC4|ARP5|MGC19485|PBI|bK150C2.3	P28018	apolipoprotein B mRNA editing enzyme catalytic subunit 3C	APOBEC3C
971	APOBEC3D	1.02608	1.04877	1.02212	0.757073	0.413012	0.748875	0.369942	0.407086	0.438645	0.311788	0.564375	0.339891	0.243123	0.430381	0.613806	0.18186	0.369377	0.408788	0.50117	0.35693	0.48305	0.23838	0.474618	0.265699	0.184827	0.346999	0.528704	0.135749	0.291608	0.330347	0.413352	0.282319	0.399942	140564	chr22	39417118	39429256	2503	+	NM_152426	protein_coding	APOBEC3DE|APOBEC3E|ARP6	P22363	apolipoprotein B mRNA editing enzyme catalytic subunit 3D	APOBEC3D
972	APOBEC3F	1.16944	1.04475	0.893373	0.0186936	0.532731	0.172618	0.224623	0.450446	0.287781	0.225356	0.291616	0.235034	0.14258	0.590653	0.497944	0.344739	0.353665	0.509755	0.0859972	0.25707	0.266355	0.166869	0.221466	0.176963	0.104755	0.505248	0.410908	0.271778	0.277633	0.426793	0.0607218	0.196288	0.204219	200316	chr22	39436673	39451975	5031	+	NM_145298	protein_coding	ARP8|BK150C2.4.MRNA|KA6|MGC74891	P188	apolipoprotein B mRNA editing enzyme catalytic subunit 3F	APOBEC3F
973	APOBEC3G	0.982593	0.971359	0.988567	0.666353	0.41961	0.670688	0.12683	0.101496	0.0849064	0.0867483	0.0440533	0.248444	0.119904	0.0437183	0.140399	0.0449199	0.172408	0.116345	0.0592395	0.110038	0.0528576	0.0610446	0.0303882	0.187948	0.0872449	0.030662	0.101755	0.0320394	0.126853	0.0849051	0.0415295	0.0798195	0.0377326	60489	chr22	39473010	39483748	1834	+	NM_021822	protein_coding	ARCD|ARP-9|ARP9|CEM-15|CEM15|FLJ12740|bK150C2.7|dJ494G10.1	P35977	apolipoprotein B mRNA editing enzyme catalytic subunit 3G	APOBEC3G
974	APOBEC3H	1	1	1	1	1	1	0	0	0	0	0	0	0	0	0	0	0	0	0	0	0	0	0	0	0	0	0	0	0	0	0	0	0	164668	chr22	39493229	39500072	1615	+	NM_181773	protein_coding	ARP10	P10914	apolipoprotein B mRNA editing enzyme catalytic subunit 3H	APOBEC3H
975	APOBEC4	1.04577	1.02096	0.976273	0.0590767	0.369535	0.380181	0.0350353	0.0996067	0.0649632	0.0557195	0.0554666	0.0282227	0	0.027764	0.119327	0.111142	0.137745	0.110482	0.110629	0.0355462	0	0.0387291	0.0385508	0.0197605	0	0.0193593	0.0858428	0.0807497	0.100115	0.0804221	0.0791686	0.0252007	0	403314	chr1	183615411	183622448	2778	-	NM_203454	protein_coding	C1orf169|MGC26594	P26243	apolipoprotein B mRNA editing enzyme catalytic polypeptide like 4	APOBEC4
976	APOBR	1.00725	1.02709	1.0197	0.790086	0.0679198	0.468136	0.0876462	0.0980629	0.126205	0.0792784	0.0978706	0.117539	0.0551617	3.78452e-05	0.168161	0.0997188	0.119191	0.130976	0.131523	0.147495	0.094302	0.055611	0.0691952	0.0848966	0.0393377	0	0.123115	0.0722304	0.0860585	0.0960244	0.0948177	0.108321	0.0681364	55911	chr16	28505970	28510291	3792	+	NM_018690	protein_coding	.	P9968	apolipoprotein B receptor	APOBR
977	APOC1	0.830297	0.782667	0.942635	0.364708	0.275565	0.772495	2.79933	2.53103	2.4458	2.74351	2.65428	2.37265	3.27404	2.33706	2.42176	2.98849	2.25459	2.64776	1.5934	2.5766	2.71002	5.65101	5.25155	4.1794	8.70452	4.04639	4.34415	6.97077	3.76988	5.30302	2.00436	4.98737	5.57047	341	chr19	45417921	45422606	461	+	NM_001645	protein_coding	.	P21243	apolipoprotein C1	APOC1
978	APOC1P1	1	1	1	1	1	1	0	0	0	0	0	0	0	0	0	0	0	0	0	0	0	0	0	0	0	0	0	0	0	0	0	0	0	342	chr19	45430060	45434643	952	+	NR_028414	misc_RNA	DKFZp781C1677	.	apolipoprotein C1 pseudogene 1	APOC1P1
979	APOC2	1	1	1	1	1	1	0	0	0	0	0	0	0	0	0	0	0	0	0	0	0	0	0	0	0	0	0	0	0	0	0	0	0	344	chr19	45449239	45452822	729	+	NM_000483	protein_coding	MGC75082	P33726	apolipoprotein C2	APOC2
980	APOC3	1	1	1	1	1	1	0	0	0	0	0	0	0	0	0	0	0	0	0	0	0	0	0	0	0	0	0	0	0	0	0	0	0	345	chr11	116700624	116703787	533	+	NM_000040	protein_coding	APOCIII|MGC150353	P2369	apolipoprotein C3	APOC3
981	APOC4	0.970832	1.00996	1.0403	0.355784	0.845068	0.355903	0.0427174	1.03354e-05	0.0570098	7.00499e-05	0.163705	0	0	1.18813e-05	2.53351e-05	0	4.12494e-06	0	3.67e-05	0.215621	0	0	0.118917	0	0	0	0	0	0	0	0	0.16199	0	346	chr19	45445495	45448753	473	+	NM_001646	protein_coding	.	P21561	apolipoprotein C4	APOC4
982	APOC4-APOC2	1	1	1	1	1	1	0	0	0	0	0	0	0	0	0	0	0	0	0	0	0	0	0	0	0	0	0	0	0	0	0	0	0	100533990	chr19	45445495	45448147	258	+	NR_037932	lncRNA	.	.	APOC4-APOC2 readthrough (NMD candidate)	APOC4-APOC2
983	APOD	1	1	1	1	1	1	0	0	0	0	0	0	0	0	0	0	0	0	0	0	0	0	0	0	0	0	0	0	0	0	0	0	0	347	chr3	195295573	195311076	1130	-	NM_001647	protein_coding	.	P17011	apolipoprotein D	APOD
984	APOE	1.06827	1.03454	0.968423	0.630178	0.736161	0.783373	0.675789	0.771063	0.724773	0.927492	0.709236	0.678759	0.32448	0.71507	0.437614	1.11538	0.734364	0.863737	0.587271	0.819604	0.607381	0.89468	0.628923	0.600836	0.25417	0.640532	0.352737	1.17204	0.6633	0.825446	0.4996	0.768402	0.526771	348	chr19	45409006	45412652	1444	+	NM_000041	protein_coding	AD2|LDLCQ5|LPG|MGC1571	P29568	apolipoprotein E	APOE
985	APOF	0.991466	1.00225	1.01088	0.355554	0.875143	0.355903	0.0123682	2.8825e-06	0.0156175	1.95369e-05	1.94769e-05	0.0488112	0	3.31365e-06	7.06591e-06	0	1.15043e-06	0	1.02356e-05	0.0614708	0	0	0	0.0344186	0	0	0	0	0	0	0	0.0438402	0	319	chr12	56754355	56756583	1689	-	NM_001638	protein_coding	Apo-F|DKFZp781G18150|LTIP|MGC22520	P2855	apolipoprotein F	APOF
986	APOH	0.987274	0.987274	1	0.355758	0.355752	0.917453	0.0184797	1.89926e-06	1.68604e-06	1.28727e-05	1.28332e-05	0.0725151	0	2.18334e-06	4.65568e-06	0	7.58012e-07	0	6.74414e-06	0	0	0	0	0.0515567	0	0	0	0	0	0	0	0	0	350	chr17	64208147	64225556	1201	-	NM_000042	protein_coding	B2G1|BG	P20922	apolipoprotein H	APOH
987	APOL1	0.981937	1.02662	1.0455	0.771069	0.712207	0.407562	1.51609	1.48979	1.55399	1.66085	1.5193	1.57204	1.28615	1.42405	1.55482	1.42256	1.55187	1.39908	1.5193	1.59364	1.68846	2.14444	1.85036	1.97347	1.44597	1.68078	1.93197	1.69067	1.93099	1.64977	1.85803	2.02695	2.23387	8542	chr22	36649117	36663577	3119	+	NM_001136540	protein_coding	APO-L|APOL|APOL-I	P15785	apolipoprotein L1	APOL1
988	APOL2	1.17498	1.20067	1.02186	0.00894086	0.00869924	0.629252	2.7293	2.96194	2.99314	2.75582	2.82177	2.58495	2.74431	2.88292	2.91331	3.04792	2.9976	2.90158	2.97698	2.9616	3.12308	5.70396	6.01828	5.00054	5.72634	6.36725	6.51364	7.30877	6.98336	6.51725	6.84373	6.81917	7.7491	23780	chr22	36622255	36636000	2686	-	NM_145637	protein_coding	APOL-II|APOL3	P18874	apolipoprotein L2	APOL2
989	APOL3	1.14207	1.08096	0.94649	0.00122294	0.23972	0.379838	0.448332	0.639986	0.560646	0.39692	0.449346	0.468498	0.477226	0.653357	0.709482	0.595789	0.598286	0.321064	0.555476	0.71384	0.623538	0.312964	0.36142	0.38372	0.394196	0.571959	0.633268	0.514447	0.513634	0.251983	0.467253	0.642987	0.543612	80833	chr22	36536371	36562225	5573	-	NM_145641	protein_coding	APOLIII|CG121	P2427	apolipoprotein L3	APOL3
990	APOL4	1.0519	1.06042	1.0081	0.00370997	0.13135	0.808355	0.0685951	0.141586	0.153231	0.0477826	0.0705505	0.0477021	0.107514	0.136279	0.126724	0.162559	0.140543	0.0319059	0.154715	0.253453	0.16428	0.0329966	0.0492713	0.0336259	0.0779302	0.0988516	0.0913733	0.1202	0.102244	0.022814	0.112483	0.193039	0.121462	80832	chr22	36585176	36600879	3415	-	NM_145660	protein_coding	APOL-IV|APOLIV	P13778	apolipoprotein L4	APOL4
991	APOL5	1	1	1	1	1	1	0	0	0	0	0	0	0	0	0	0	0	0	0	0	0	0	0	0	0	0	0	0	0	0	0	0	0	80831	chr22	36113919	36125529	1437	+	NM_030642	protein_coding	APOL-V|APOLV	P9816	apolipoprotein L5	APOL5
992	APOL6	0.907753	0.871252	0.95979	0.014766	0.00656449	0.190072	1.94584	1.80621	1.747	1.89443	1.89534	2.03822	1.95055	1.75135	1.82851	1.79483	1.84828	1.74987	1.83995	1.68738	1.70594	2.69502	2.69741	3.1077	2.87723	2.36317	2.54377	2.4839	2.59939	2.3806	2.56841	2.23131	2.27474	80830	chr22	36044424	36064456	10139	+	NM_030641	protein_coding	APOL-VI|APOLVI|DKFZp667M075|FLJ38562|FLJ90164|MGC57495	P3808	apolipoprotein L6	APOL6
993	APOLD1	0.894081	0.875446	0.979157	0.000770816	0.0617962	0.746893	1.43762	1.2761	1.24571	1.46145	1.43387	1.39779	1.45652	1.3056	1.2514	1.22612	1.31926	0.973478	1.31861	1.25868	1.39772	1.7395	1.68764	1.63516	1.75177	1.46966	1.37616	1.34752	1.49461	0.972171	1.48737	1.39938	1.64313	81575	chr12	12878851	12944399	4825	+	NM_001130415	protein_coding	DKFZp434F0318|FLJ25138|FLJ95166|VERGE	P15983	apolipoprotein L domain containing 1	APOLD1
994	APOM	0.840345	1.08484	1.29095	0.218023	0.741247	0.328992	1.06161	0.810665	1.1791	1.34337	1.23424	0.851248	0.726802	0.676512	0.985756	0.595986	0.945573	0.628222	0.723456	1.19381	1.83716	1.52588	1.34185	0.804164	0.658728	0.597078	0.977077	0.515788	0.925436	0.551199	0.647293	1.29303	2.58242	55937	chr6	31620187	31625987	903	+	NM_001256169	protein_coding	G3a|HSPC336|MGC22400|NG20	P14507	apolipoprotein M	APOM
995	APOO	1.07384	1.05023	0.978011	0.104328	0.453796	0.665268	3.61434	3.71712	3.68505	3.57199	3.65777	3.73154	3.4842	3.68698	3.72034	3.75703	3.7032	3.87504	3.61944	3.57128	3.6552	10.7996	11.5241	12.2846	10.2359	11.8625	12.1441	12.5876	12.019	13.7628	11.2402	10.9353	11.6571	79135	chrX	23851465	23926057	1027	-	NR_026545	protein_coding	FAM121B|MGC4825	.	apolipoprotein O	APOO
996	APOOL	1.09901	1.09491	0.996271	0.0248817	0.140452	0.945119	2.47448	2.61069	2.6053	2.55198	2.4528	2.48815	2.40079	2.59165	2.69791	2.5426	2.60621	2.44047	2.76627	2.56931	2.62615	4.8232	4.43575	4.6111	4.30045	5.02072	5.4725	4.85334	5.0865	4.46026	5.77935	4.95699	5.19951	139322	chrX	84258898	84348323	6467	+	NM_198450	protein_coding	CXorf33|FAM121A|MGC129748|UNQ8193	P31410	apolipoprotein O like	APOOL
997	APOOP5	0.970851	0.97085	1	0.133957	0.133953	0.917453	0.042683	4.39507e-06	3.90165e-06	0.0830101	2.96972e-05	0.0852396	0	5.05246e-06	1.07737e-05	0	1.75411e-06	0	1.56066e-05	0	0	0.0584768	0	0.0608736	0	0	0	0	0	0	0	0	0	644649	chr16	59788045	59789095	1051	-	NR_028471	misc_RNA	.	.	apolipoprotein O pseudogene 5	APOOP5
998	APOPT1	1.0948	1.06569	0.973408	0.000367237	0.108087	0.418518	4.56047	4.69114	4.65226	4.53466	4.55559	4.54295	4.60757	4.67995	4.68885	4.67943	4.71604	4.74369	4.63865	4.68694	4.5314	21.9904	22.3274	22.3135	23.479	24.5988	24.7178	24.758	25.2704	25.9657	23.8056	24.8647	22.2376	84334	chr14	104029294	104057236	2553	+	NM_001302654	protein_coding	.	P22503	apoptogenic 1, mitochondrial	APOPT1
999	APP	0.959285	0.959212	0.999924	0.0471244	0.136418	0.997276	7.58465	7.52468	7.52457	7.55151	7.56077	7.6428	7.58177	7.54635	7.49853	7.54221	7.51107	7.54073	7.44515	7.52704	7.58198	185.052	186.254	198.874	191.384	185.668	179.294	186.405	181.325	186.47	172.51	184.24	191.553	351	chr21	27252861	27543446	4015	-	NM_001136129	protein_coding	AAA|ABETA|ABPP|AD1|APPI|CTFgamma|CVAP|PN2	P23283	amyloid beta precursor protein	APP
1000	APPBP2	0.995587	0.987134	0.99151	0.909581	0.761976	0.800262	3.11109	3.10471	3.09241	3.05701	3.02268	3.12871	3.22739	3.14648	3.11286	3.02013	3.13596	3.03106	3.18724	3.10851	3.03723	7.26033	7.0659	7.74732	8.40049	7.84387	7.62779	7.15254	7.78678	7.22466	8.0738	7.65827	7.24608	10513	chr17	58520510	58603601	6499	-	NM_006380	protein_coding	HS.84084|KIAA0228|PAT1	P11404	amyloid beta precursor protein binding protein 2	APPBP2
1001	APPL1	1.06215	1.07806	1.01497	0.0868257	0.0434716	0.603452	4.01365	4.10064	4.12208	4.01115	3.92515	4.08293	4.03089	4.18081	4.08148	4.06644	4.07071	4.04321	4.17048	4.12004	4.15136	14.9965	14.0697	15.9484	15.4124	17.1125	15.8816	15.8407	15.7959	15.5936	16.9338	16.4591	16.8528	26060	chr3	57261765	57307498	6060	+	NM_012096	protein_coding	APPL|DIP13alpha	P6144	adaptor protein, phosphotyrosine interacting with PH domain and leucine zipper 1	APPL1
1002	APPL2	1.07946	1.06409	0.985763	0.0310016	0.152152	0.67599	3.88817	3.99847	3.97779	3.97338	3.8809	3.88534	3.8083	4.04881	3.94677	4.00729	3.98916	3.89415	4.03344	3.91318	4.06292	14.5852	13.6163	13.7791	13.0664	15.5289	14.3768	15.163	14.873	13.9647	15.3089	14.1274	15.7904	55198	chr12	105567075	105630008	3545	-	NM_001251904	protein_coding	DIP13B|FLJ10659	P19335	adaptor protein, phosphotyrosine interacting with PH domain and leucine zipper 2	APPL2
1003	APRT	1.03288	1.05196	1.01847	0.276519	0.348183	0.741194	6.93808	6.98476	7.01115	6.95267	6.89758	6.91976	6.98091	7.0597	6.99262	6.98883	6.89302	7.16216	6.85959	6.93421	7.06957	121.848	117.247	120.088	125.85	132.222	125.967	126.7	117.794	143.194	114.626	121.821	133.986	353	chr16	88875877	88878342	673	-	NM_001030018	protein_coding	AMP|DKFZp686D13177|MGC125856|MGC125857|MGC129961	P23513	adenine phosphoribosyltransferase	APRT
1004	APTR	0.974383	0.920466	0.944665	0.765217	0.0367452	0.555241	1.99824	1.9608	1.87867	1.98943	2.03491	1.98612	1.98184	1.89019	1.95439	2.25533	1.68452	1.76497	1.85156	1.91557	1.97427	2.94585	3.07249	2.96202	2.9627	2.70281	2.86665	3.79333	2.21309	2.41689	2.59675	2.78516	2.94416	100505854	chr7	77313168	77326662	1978	-	NR_038361	lncRNA	.	.	Alu-mediated CDKN1A/p21 transcriptional regulator (non-protein coding)	APTR
1005	APTX	0.96481	0.940025	0.974312	0.193296	0.128067	0.477149	4.43491	4.38323	4.34568	4.4002	4.48688	4.4706	4.37909	4.40149	4.43922	4.35363	4.33629	4.44734	4.38524	4.27045	4.27169	19.9478	21.2475	21.1732	19.8929	20.1055	20.632	19.5515	19.1906	20.958	19.8103	18.3801	18.409	54840	chr9	32972604	33001639	2461	-	NM_001195248	protein_coding	AOA|AOA1|AXA1|EAOH|EOAHA|FHA-HIT|FLJ20157|MGC1072	P27297	aprataxin	APTX
1006	AQP1	1.05734	1.01063	0.955816	0.535112	0.809219	0.59256	0.24798	0.328423	0.263228	0.370962	0.277433	0.134459	0.198166	0.526932	0.457669	0.24514	0.0330432	0.280698	0.280085	0.168221	0.319529	0.290378	0.209673	0.0977011	0.148236	0.440256	0.372145	0.186656	0.0231193	0.216751	0.213016	0.1246	0.249475	358	chr7	30951415	30965131	3451	+	NM_198098	protein_coding	AQP-CHIP|CHIP28|CO|MGC26324	P27558	aquaporin 1 (Colton blood group)	AQP1
1007	AQP10	1	1	1	1	1	1	0	0	0	0	0	0	0	0	0	0	0	0	0	0	0	0	0	0	0	0	0	0	0	0	0	0	0	89872	chr1	154293592	154297801	1791	+	NM_080429	protein_coding	AQPA_HUMAN	P2587	aquaporin 10	AQP10
1008	AQP11	0.942061	1.00403	1.06578	0.380278	0.947878	0.362696	1.11979	1.03368	1.1256	1.2103	1.15791	0.937517	1.15846	1.01862	1.18899	0.845194	1.06112	1.28943	1.12971	1.04377	1.02404	1.30289	1.22079	0.915344	1.23761	1.02435	1.27602	0.802045	1.08597	1.45383	1.18271	1.06672	1.0394	282679	chr11	77300680	77321401	2153	+	NM_173039	protein_coding	AQPX1	P13025	aquaporin 11	AQP11
1009	AQP12A	1	1	1	1	1	1	0	0	0	0	0	0	0	0	0	0	0	0	0	0	0	0	0	0	0	0	0	0	0	0	0	0	0	375318	chr2	241631262	241637900	1084	+	NM_198998	protein_coding	AQP12|AQPX2	P12291	aquaporin 12A	AQP12A
1010	AQP12B	1	1	1	1	1	1	0	0	0	0	0	0	0	0	0	0	0	0	0	0	0	0	0	0	0	0	0	0	0	0	0	0	0	653437	chr2	241615835	241622317	1114	-	NM_001102467	protein_coding	INSSA3|MGC149473	P19994	aquaporin 12B	AQP12B
1011	AQP2	0.996819	0.996819	1	0.355758	0.355752	0.917453	0.00459756	4.70376e-07	4.17568e-07	3.1881e-06	3.17832e-06	0.0182967	0	5.40732e-07	1.15304e-06	0	1.87731e-07	0	1.67027e-06	0	0	0	0	0.012766	0	0	0	0	0	0	0	0	0	359	chr12	50344524	50352664	4179	+	NM_000486	protein_coding	AQP-CD|MGC34501|WCH-CD	P21290	aquaporin 2	AQP2
1012	AQP3	0.882459	1.02896	1.16602	0.0700312	0.743671	0.109487	1.68905	1.50865	1.73024	1.73013	1.51573	1.82432	1.66875	1.60474	1.50087	1.37126	1.54758	1.59405	1.97671	1.76925	1.53986	2.2983	1.84244	2.54165	2.18891	2.03837	1.82401	1.59725	1.92223	2.03366	2.92437	2.41906	1.91805	360	chr9	33441152	33447631	1871	-	NM_004925	protein_coding	GIL	P10553	aquaporin 3 (Gill blood group)	AQP3
1013	AQP4	1.00564	1.00349	0.997864	0.356128	0.356318	0.757184	4.52386e-06	0.00811919	0.0050338	9.06161e-06	9.0338e-06	0	0	1.53694e-06	0.0322041	0	5.33594e-07	0	0.0200307	0	0	0	0	0	0	0	0.0224416	0	0	0	0.0138481	0	0	361	chr18	24432008	24445716	5202	-	NM_001650	protein_coding	HMIWC2|MGC22454|MIWC	P26554	aquaporin 4	AQP4
1014	AQP4-AS1	1.01255	0.989686	0.977422	0.46165	0.454133	0.140634	0.0249391	0.0429284	0.00998205	0.0330462	5.41635e-05	0.0656261	0	0.0326121	0.0714293	0	0.0665256	0	2.84642e-05	0	0.0394927	0.0227664	0	0.0465473	0	0.0227944	0.0505066	0	0.0471529	0	0	0	0.0280271	147429	chr18	24445272	24515910	2392	+	NR_026908	lncRNA	.	.	AQP4 antisense RNA 1	AQP4-AS1
1015	AQP5	0.979211	1.01606	1.03763	0.385522	0.622954	0.233253	0.0753138	0.0450054	0.0982931	0.128561	0.000155076	0.0881275	0.0814228	0.0439468	5.62599e-05	0.0893	0.045338	0.172412	8.14967e-05	0.110672	0.104733	0.0920729	0	0.0630008	0.0584907	0.0308337	0	0.0644396	0.0318907	0.12807	0	0.0802662	0.075889	362	chr12	50355279	50359465	1825	+	NM_001651	protein_coding	.	P14904	aquaporin 5	AQP5
1016	AQP6	1.02845	1.05008	1.02103	0.428579	0.117645	0.617446	0.0785572	0.119036	0.149061	0.114344	0.0863591	0.058698	0.0540151	0.0291779	0.154758	0.0592678	0.224575	0.223558	0.188264	0.109529	0.0697198	0.0813584	0.0607437	0.0415349	0.038518	0.0203434	0.112743	0.0424354	0.168331	0.169027	0.138584	0.0794485	0.0500138	363	chr12	50366620	50370922	2654	+	NM_001652	protein_coding	AQP2L|KID	P3890	aquaporin 6	AQP6
1017	AQP7	1.03711	1.01633	0.979966	0.159956	0.356246	0.490998	2.66676e-05	0.0525936	0.0233977	5.34168e-05	5.32528e-05	0	0	0.131761	0.0743392	0	3.14548e-06	0.0913702	2.79856e-05	0	0	0	0	0	0	0.0954503	0.0526213	0	0	0.0660577	0	0	0	364	chr9	33384948	33402517	1256	-	NM_001170	protein_coding	AQP7L|AQP9|AQPap|MGC149555|MGC149556	P27161	aquaporin 7	AQP7
1018	AQP7P1	1.2823	1.34279	1.04718	0.0354893	0.00373481	0.640904	0.227068	0.585802	0.652306	0.267735	0.286619	0.118167	0.229916	0.470408	0.892113	0.483827	0.447472	0.796453	0.654119	0.703972	0.430016	0.20105	0.216813	0.0853793	0.174123	0.384827	0.853672	0.401103	0.363422	0.74147	0.57108	0.63168	0.349505	375719	chr9	67270215	67289492	3180	-	NR_002817	misc_RNA	bA251O17.3	.	aquaporin 7 pseudogene 1	AQP7P1
1019	AQP7P3	1.2685	1.23942	0.977076	0.173094	0.310928	0.855414	0.426967	0.770095	0.736638	0.541166	0.0016485	0	0.942102	0.84412	0.755795	0.88335	0.578353	0.725272	1.143	0.495869	0.478586	0.45031	0	0	0.924936	0.794064	0.686383	0.849074	0.492846	0.658034	1.20408	0.412568	0.396077	441432	chr9	42858152	42893137	529	+	NR_026558	misc_RNA	AQPap-3	.	aquaporin 7 pseudogene 3	AQP7P3
1020	AQP8	1	1	1	1	1	1	0	0	0	0	0	0	0	0	0	0	0	0	0	0	0	0	0	0	0	0	0	0	0	0	0	0	0	343	chr16	25228285	25240253	1308	+	NM_001169	protein_coding	.	P10371	aquaporin 8	AQP8
1021	AQP9	0.999999	1.00571	1.00571	0.284073	0.356019	0.355909	2.8695e-06	8.4804e-07	0.00821045	5.74782e-06	5.73018e-06	0	0	9.74886e-07	2.07881e-06	0	3.38461e-07	0	3.01133e-06	0.0325622	0	0	0	0	0	0	0	0	0	0	0	0.0230171	0	366	chr15	58430408	58478110	3021	+	NM_020980	protein_coding	AQP-9|HsT17287|SSC1	P27790	aquaporin 9	AQP9
1022	AQR	0.970801	0.964681	0.993695	0.162645	0.465817	0.894366	3.78406	3.74131	3.73219	3.81	3.76405	3.82728	3.733	3.75547	3.73314	3.70044	3.77513	3.54791	3.86186	3.76205	3.7393	12.9182	12.4815	13.1961	12.3495	12.4877	12.2607	12.0666	12.6845	10.7727	13.4811	12.6219	12.4171	9716	chr15	35148552	35261995	5080	-	NM_014691	protein_coding	DKFZp686B23123|IBP160|KIAA0560|fSAP164	P32370	aquarius intron-binding spliceosomal factor	AQR
1023	AR	0.960865	0.958223	0.99725	0.328543	0.122409	0.943037	0.486605	0.429011	0.425039	0.49338	0.546821	0.482412	0.421044	0.393958	0.339253	0.412751	0.560643	0.378355	0.444644	0.397931	0.477139	0.403818	0.456686	0.397126	0.340714	0.313414	0.26397	0.333529	0.474675	0.302605	0.359052	0.31941	0.394286	367	chrX	66763874	66950461	10838	+	NM_000044	protein_coding	AIS|DHTR|HUMARA|HYSP1|KD|NR3C4|SBMA|SMAX1|TFM	P24784	androgen receptor	AR
1024	ARAF	0.981355	1.03463	1.05429	0.58514	0.281299	0.153507	4.96545	4.93829	5.01457	5.01563	4.96451	4.88051	4.99744	5.04416	4.90263	4.8913	4.90962	5.03227	5.08153	4.99833	4.9426	31.0892	29.9717	28.4594	31.0747	31.9499	28.8238	28.836	29.0424	31.9399	32.719	31.0971	29.901	369	chrX	47420499	47431320	2604	+	NM_001654	protein_coding	A-RAF|ARAF1|PKS2|RAFA1	P11928	A-Raf proto-oncogene, serine/threonine kinase	ARAF
1025	ARAP1	0.99575	0.967828	0.971959	0.839024	0.136986	0.240657	5.10389	5.09775	5.05671	5.14377	5.11977	5.06578	5.08498	5.1587	5.08988	5.09291	5.04729	5.06634	5.01969	5.02699	5.11197	34.0696	33.4911	32.4963	33.0817	34.6724	32.9575	33.3096	32.0506	32.7292	31.3015	31.7425	33.7497	116985	chr11	72396114	72463434	5646	-	NM_015242	protein_coding	CENTD2|KIAA0782	P613	ArfGAP with RhoGAP domain, ankyrin repeat and PH domain 1	ARAP1
1026	ARAP2	0.893218	0.850815	0.952527	0.00962796	0.00904826	0.38591	2.42823	2.26532	2.19515	2.4092	2.39991	2.42366	2.47885	2.31246	2.16621	2.22495	2.35041	2.01504	2.17082	2.28042	2.29707	4.27661	4.24278	4.36574	4.59322	3.96162	3.47719	3.69599	4.09769	3.06554	3.4865	3.87538	3.93452	116984	chr4	36067620	36245979	7362	-	NM_015230	protein_coding	CENTD1|FLJ13675|FLJ44916|KIAA0580|PARX	P34257	ArfGAP with RhoGAP domain, ankyrin repeat and PH domain 2	ARAP2
1027	ARAP3	1.05699	1.04848	0.991948	0.166562	0.200383	0.829181	3.36924	3.4492	3.43754	3.44908	3.38413	3.29567	3.3437	3.43962	3.52043	3.3412	3.48923	3.47393	3.4304	3.34089	3.49993	9.83892	9.36118	8.82057	9.19199	9.83605	10.4441	9.18571	10.2246	10.18	9.73805	9.17295	10.364	64411	chr5	141032968	141061800	5262	-	NM_022481	protein_coding	CENTD3|DRAG1|FLJ21065	P25742	ArfGAP with RhoGAP domain, ankyrin repeat and PH domain 3	ARAP3
1028	ARC	1.10507	1.09088	0.987157	0.241832	0.18827	0.886772	0.318354	0.46249	0.443842	0.30921	0.349741	0.222467	0.386857	0.428142	0.336593	0.730436	0.315288	0.535251	0.558439	0.219326	0.438109	0.236166	0.271264	0.166757	0.309216	0.344909	0.261681	0.662402	0.244089	0.452501	0.470511	0.165426	0.356948	23237	chr8	143692405	143695833	2948	-	NM_015193	protein_coding	Arg3.1|KIAA0278	P14667	activity-regulated cytoskeleton-associated protein	ARC
1029	ARCN1	0.941157	0.951788	1.0113	0.0806544	0.167781	0.783787	6.52904	6.44155	6.45776	6.58218	6.51034	6.52818	6.49394	6.47565	6.35822	6.3998	6.52661	6.35388	6.55565	6.47703	6.43713	94.0325	89.4158	91.3044	89.5089	87.8707	80.793	83.8941	91.15	81.3486	92.666	88.462	86.0782	372	chr11	118443102	118473747	4015	+	NM_001655	protein_coding	COPD	P2488	archain 1	ARCN1
1030	AREG	1.55282	1.60914	1.03627	7.77752e-05	0.00119505	0.615807	2.32704	2.96193	3.01333	2.41859	2.15286	2.32838	2.39369	2.95454	2.851	3.0053	3.03042	2.83086	2.9779	2.97391	3.23987	4.30528	3.41127	4.02291	4.27584	6.74259	6.19633	7.06614	7.16713	6.15702	6.84956	6.88531	8.48495	374	chr4	75310815	75490485	2552	+	NM_001657	protein_coding	AR|AREGB|CRDGF|MGC13647|SDGF	P21318	amphiregulin	AREG
1031	AREL1	0.979104	0.998154	1.01946	0.414267	0.95948	0.519325	4.16073	4.13026	4.15806	4.15909	4.24492	4.0896	4.14499	4.16284	4.13111	4.11064	4.11588	4.15594	4.25123	4.06249	4.15641	16.725	17.8136	16.0269	16.7628	16.8879	16.4722	16.3651	16.3301	16.9419	17.966	15.7778	16.9164	9870	chr14	75127955	75179807	5445	-	NM_001039479	protein_coding	.	P13746	apoptosis resistant E3 ubiquitin protein ligase 1	AREL1
1032	ARF1	1.01458	0.997274	0.982947	0.322951	0.854598	0.336447	8.11776	8.13863	8.11382	8.14229	8.1099	8.09202	8.12634	8.1534	8.09551	8.17054	8.13401	8.13569	8.06972	8.1011	8.14749	279.202	272.986	271.89	279.611	283.32	271.703	288.688	279.782	282.164	266.509	274.769	283.964	375	chr1	228270361	228286913	2091	+	NM_001658	protein_coding	.	P1970	ADP ribosylation factor 1	ARF1
1033	ARF3	0.998499	1.01302	1.01455	0.938815	0.494311	0.350761	5.91547	5.91331	5.93414	5.8901	5.97521	5.87675	5.91784	5.89258	5.95391	5.88483	5.92087	5.96662	5.90716	5.91841	5.94363	57.8205	61.3992	57.7654	59.71	58.3254	60.8048	58.4076	59.5552	61.9565	58.7538	59.7393	60.8492	377	chr12	49329992	49351252	3537	-	NM_001659	protein_coding	.	P16661	ADP ribosylation factor 3	ARF3
1034	ARF4	1.03253	0.983015	0.952049	0.410951	0.680126	0.106375	7.52306	7.56924	7.49834	7.63516	7.40868	7.55064	7.48818	7.5357	7.56592	7.54226	7.63109	7.4772	7.58078	7.49362	7.43797	196.162	167.514	186.506	179.302	184.294	187.916	186.411	197.142	178.395	189.617	179.998	173.263	378	chr3	57557090	57583215	1740	-	NM_001660	protein_coding	ARF2	P2289	ADP ribosylation factor 4	ARF4
[truncated: 23,390 more rows]

## Sheet: Group
index	No_treat	Beta21	Dexa
[truncated: 4 more rows]

[truncated: 1 more sheets: info]
